# Supplementary material
Source: publisher figshare collection journal article supplement (https://acs.figshare.com/ndownloader/files/7253927)
Supplement: Supplementary file 1 [file 7253927]

 
data_hartwig133 
  
_audit_creation_method            'SHELXL-2016/4' 
_shelx_SHELXL_version_number      '2016/4' 
_chemical_name_systematic         hartwig133 
_chemical_name_common             xj-04-076 
_chemical_melting_point           ? 
_chemical_formula_moiety          ? 
_chemical_formula_sum 
 'C21 H14 F5 N O3 S' 
_chemical_formula_weight          455.39 
  
loop_ 
 _atom_type_symbol 
 _atom_type_description 
 _atom_type_scat_dispersion_real 
 _atom_type_scat_dispersion_imag 
 _atom_type_scat_source 
 'C'  'C'   0.0181   0.0091 
 'International Tables Vol C Tables 4.2.6.8 and 6.1.1.4' 
 'H'  'H'   0.0000   0.0000 
 'International Tables Vol C Tables 4.2.6.8 and 6.1.1.4' 
 'N'  'N'   0.0311   0.0180 
 'International Tables Vol C Tables 4.2.6.8 and 6.1.1.4' 
 'O'  'O'   0.0492   0.0322 
 'International Tables Vol C Tables 4.2.6.8 and 6.1.1.4' 
 'F'  'F'   0.0727   0.0534 
 'International Tables Vol C Tables 4.2.6.8 and 6.1.1.4' 
 'S'  'S'   0.3331   0.5567 
 'International Tables Vol C Tables 4.2.6.8 and 6.1.1.4' 
  
_space_group_crystal_system       monoclinic 
_space_group_IT_number            4 
_space_group_name_H-M_alt         'P 21' 
_space_group_name_Hall            'P 2yb' 

_diffrn_refln_scan_width          2.0 
_diffrn_refln_scan_rate           10 
_space_group.centring_type        primitive 
  
_shelx_space_group_comment 
; 
The symmetry employed for this shelxl refinement is uniquely defined 
by the following loop, which should always be used as a source of 
symmetry information in preference to the above space-group names. 
They are only intended as comments. 
; 
  
loop_ 
 _space_group_symop_operation_xyz 
 'x, y, z' 
 '-x, y+1/2, -z' 
  
_cell_length_a                    5.9674(3) 
_cell_length_b                    26.9049(15) 
_cell_length_c                    12.1120(7) 
_cell_angle_alpha                 90 
_cell_angle_beta                  90.059(4) 
_cell_angle_gamma                 90 
_cell_volume                      1944.61(18) 
_cell_formula_units_Z             4 
_cell_measurement_temperature     100(2) 
_cell_measurement_reflns_used     9516 
_cell_measurement_theta_min       3.28 
_cell_measurement_theta_max       68.24 
  
_exptl_crystal_description        rod 
_exptl_crystal_colour             colorless 
_exptl_crystal_density_meas       ? 
_exptl_crystal_density_method     ? 
_exptl_crystal_density_diffrn     1.555 
_exptl_crystal_F_000              928 
_exptl_transmission_factor_min    ? 
_exptl_transmission_factor_max    ? 
_exptl_crystal_size_max           0.060 
_exptl_crystal_size_mid           0.030 
_exptl_crystal_size_min           0.030 
_exptl_absorpt_coefficient_mu     2.148 
_shelx_estimated_absorpt_T_min    0.882 
_shelx_estimated_absorpt_T_max    0.938 
_exptl_absorpt_correction_type    multi-scan 
_exptl_absorpt_correction_T_min   0.729 
_exptl_absorpt_correction_T_max   0.929 
_exptl_absorpt_process_details    SADABS 
_exptl_absorpt_special_details    ? 
_diffrn_ambient_temperature       100(2) 
_diffrn_radiation_wavelength      1.54178 
_diffrn_radiation_type            CuK\a 
_diffrn_source                    'microfocus rotating anode' 
_diffrn_measurement_device_type   'Bruker APEX-II CCD' 
_diffrn_measurement_method        '\f and \w scans' 
_diffrn_detector_area_resol_mean  8.366 
_diffrn_reflns_number             45422 
_diffrn_reflns_av_unetI/netI      0.0382 
_diffrn_reflns_av_R_equivalents   0.0498 
_diffrn_reflns_limit_h_min        -5 
_diffrn_reflns_limit_h_max        7 
_diffrn_reflns_limit_k_min        -32 
_diffrn_reflns_limit_k_max        32 
_diffrn_reflns_limit_l_min        -14 
_diffrn_reflns_limit_l_max        14 
_diffrn_reflns_theta_min          3.285 
_diffrn_reflns_theta_max          68.579 
_diffrn_reflns_theta_full         67.000 
_diffrn_measured_fraction_theta_max   0.994 
_diffrn_measured_fraction_theta_full  0.999 
_diffrn_reflns_Laue_measured_fraction_max    0.994 
_diffrn_reflns_Laue_measured_fraction_full   0.999 
_diffrn_reflns_point_group_measured_fraction_max   0.991 
_diffrn_reflns_point_group_measured_fraction_full  0.999 
_reflns_number_total              6869 
_reflns_number_gt                 6612 
_reflns_threshold_expression      'I > 2\s(I)' 
_reflns_Friedel_coverage          0.949 
_reflns_Friedel_fraction_max      0.988 
_reflns_Friedel_fraction_full     0.999 
  
_reflns_special_details 
; 
 Reflections were merged by SHELXL according to the crystal 
 class for the calculation of statistics and refinement. 
  
 _reflns_Friedel_fraction is defined as the number of unique 
 Friedel pairs measured divided by the number that would be 
 possible theoretically, ignoring centric projections and 
 systematic absences. 
; 
  
_computing_data_collection        'Bruker APEX2' 
_computing_cell_refinement        'Bruker SAINT' 
_computing_data_reduction         'Bruker SAINT' 
_computing_structure_solution     'SHELXT-2014' 
_computing_structure_refinement   'SHELXL-2016' 
_computing_molecular_graphics     'ORTEP-32' 
_computing_publication_material   'WinGX' 
_refine_special_details 
; 
 Refined as a 2-component twin. 
; 
_refine_ls_structure_factor_coef  Fsqd 
_refine_ls_matrix_type            full 
_refine_ls_weighting_scheme       calc 
_refine_ls_weighting_details 
'w=1/[\s^2^(Fo^2^)+(0.0354P)^2^+3.2226P] where P=(Fo^2^+2Fc^2^)/3' 
_atom_sites_solution_primary      iterative 
_atom_sites_solution_secondary    difmap 
_atom_sites_solution_hydrogens    geom 
_refine_ls_hydrogen_treatment     constr 
_refine_ls_extinction_method      none 
_refine_ls_extinction_coef        . 
_refine_ls_abs_structure_details 
; 
 Flack x determined using 2827 quotients [(I+)-(I-)]/[(I+)+(I-)] 
 (Parsons, Flack and Wagner, Acta Cryst. B69 (2013) 249-259). 
; 
_refine_ls_abs_structure_Flack    0.038(9) 
_chemical_absolute_configuration  ad 
_refine_ls_number_reflns          6869 
_refine_ls_number_parameters      551 
_refine_ls_number_restraints      13 
_refine_ls_R_factor_all           0.0548 
_refine_ls_R_factor_gt            0.0526 
_refine_ls_wR_factor_ref          0.1207 
_refine_ls_wR_factor_gt           0.1194 
_refine_ls_goodness_of_fit_ref    1.056 
_refine_ls_restrained_S_all       1.065 
_refine_ls_shift/su_max           0.000 
_refine_ls_shift/su_mean          0.000 
  
loop_ 
 _atom_site_label 
 _atom_site_type_symbol 
 _atom_site_fract_x 
 _atom_site_fract_y 
 _atom_site_fract_z 
 _atom_site_U_iso_or_equiv 
 _atom_site_adp_type 
 _atom_site_occupancy 
 _atom_site_site_symmetry_order 
 _atom_site_calc_flag 
 _atom_site_refinement_flags_posn 
 _atom_site_refinement_flags_adp 
 _atom_site_refinement_flags_occupancy 
 _atom_site_disorder_assembly 
 _atom_site_disorder_group 
C1 C 0.3828(13) 0.6148(3) -0.0046(6) 0.0274(16) Uani 1 1 d . . . . . 
H1 H 0.229046 0.629411 -0.009435 0.033 Uiso 1 1 calc R U . . . 
C2 C 0.5513(14) 0.6558(3) -0.0169(6) 0.0317(17) Uani 1 1 d . . . . . 
C3 C 0.7795(15) 0.6517(4) -0.0292(9) 0.049(2) Uani 1 1 d . . . . . 
H3 H 0.851484 0.620185 -0.028901 0.058 Uiso 1 1 calc R U . . . 
C4 C 0.7636(17) 0.7317(4) -0.0352(8) 0.047(2) Uani 1 1 d . . . . . 
H4 H 0.816010 0.764953 -0.039799 0.057 Uiso 1 1 calc R U . . . 
C5 C 0.4092(16) 0.5775(3) -0.0947(7) 0.039(2) Uani 1 1 d . . . . . 
H5 H 0.553448 0.563003 -0.103062 0.047 Uiso 1 1 calc R U . . . 
C6 C 0.2519(18) 0.5625(4) -0.1639(9) 0.049(2) Uani 1 1 d . . . . . 
H6A H 0.104864 0.575892 -0.158898 0.059 Uiso 1 1 calc R U . . . 
H6B H 0.285706 0.538435 -0.218761 0.059 Uiso 1 1 calc R U . . . 
C7 C 0.4089(13) 0.5877(3) 0.1120(7) 0.0291(17) Uani 1 1 d . . . . . 
H7 H 0.549203 0.567426 0.110143 0.035 Uiso 1 1 calc R U . . . 
C8 C 0.4265(13) 0.6238(3) 0.2070(6) 0.0278(17) Uani 1 1 d . . . . . 
C9 C 0.6229(13) 0.6272(3) 0.2659(7) 0.0280(17) Uani 1 1 d . . . . . 
H9 H 0.740909 0.604722 0.249200 0.034 Uiso 1 1 calc R U . . . 
C10 C 0.6559(13) 0.6619(3) 0.3484(6) 0.0287(17) Uani 1 1 d . . . . . 
H10 H 0.793888 0.663196 0.387410 0.034 Uiso 1 1 calc R U . . . 
C11 C 0.4823(14) 0.6952(3) 0.3736(7) 0.0329(18) Uani 1 1 d . . . . . 
C12 C 0.2828(14) 0.6918(3) 0.3148(7) 0.0308(18) Uani 1 1 d . . . . . 
H12 H 0.162096 0.713307 0.332849 0.037 Uiso 1 1 calc R U . . . 
C13 C 0.2568(13) 0.6572(3) 0.2297(6) 0.0300(17) Uani 1 1 d . . . . . 
H13 H 0.122545 0.656659 0.187522 0.036 Uiso 1 1 calc R U . . . 
C14 C 0.7019(16) 0.7390(3) 0.5046(8) 0.045(2) Uani 1 1 d . . . . . 
H14A H 0.750150 0.708448 0.541610 0.068 Uiso 1 1 calc R U . . . 
H14B H 0.686299 0.765676 0.559137 0.068 Uiso 1 1 calc R U . . . 
H14C H 0.813708 0.748591 0.449306 0.068 Uiso 1 1 calc R U . . . 
C15 C 0.2131(15) 0.5528(3) 0.1235(7) 0.0317(19) Uani 1 1 d . . . . . 
C16 C 0.1188(15) 0.4711(3) 0.1707(7) 0.0337(19) Uani 1 1 d . . . . . 
C17 C 0.1582(14) 0.4290(3) 0.1053(7) 0.0328(18) Uani 1 1 d . . . . . 
C18 C 0.0054(15) 0.3904(3) 0.1002(8) 0.0339(19) Uani 1 1 d . . . . . 
C19 C -0.1876(15) 0.3938(3) 0.1608(7) 0.0338(19) Uani 1 1 d . . . . . 
C20 C -0.2307(13) 0.4344(3) 0.2246(7) 0.0312(17) Uani 1 1 d . . . . . 
C21 C -0.0766(13) 0.4726(3) 0.2305(7) 0.0287(17) Uani 1 1 d . . . . . 
C22 C 0.8988(14) 0.4131(3) 0.7451(6) 0.0292(17) Uani 1 1 d . . . . . 
H22 H 0.740368 0.401176 0.749819 0.035 Uiso 1 1 calc R U . . . 
C23 C 1.0443(10) 0.3693(2) 0.7512(6) 0.040(2) Uiso 1 1 d D . . . . 
C24 C 1.247(4) 0.2902(6) 0.7857(9) 0.037(3) Uiso 0.470(9) 1 d D . P A 1 
H24 H 1.291338 0.256989 0.800289 0.044 Uiso 0.470(9) 1 calc R U P A 1 
C25 C 1.2749(15) 0.3695(6) 0.7503(9) 0.0495(15) Uiso 0.470(9) 1 d D . P A 1 
H25 H 1.354229 0.399526 0.736645 0.059 Uiso 0.470(9) 1 calc R U P A 1 
C24A C 1.327(3) 0.3008(7) 0.7711(9) 0.037(3) Uiso 0.530(9) 1 d D . P A 2 
H24A H 1.456726 0.280483 0.779548 0.044 Uiso 0.530(9) 1 calc R U P A 2 
C25A C 0.975(2) 0.3198(3) 0.7504(9) 0.0392(14) Uiso 0.530(9) 1 d D . P A 2 
H25A H 0.819945 0.312383 0.742110 0.047 Uiso 0.530(9) 1 calc R U P A 2 
C26 C 0.9350(16) 0.4495(3) 0.8386(8) 0.040(2) Uani 1 1 d . . . . . 
H26 H 1.083688 0.460618 0.851809 0.048 Uiso 1 1 calc R U . . . 
C27 C 0.7774(18) 0.4666(3) 0.9024(7) 0.043(2) Uani 1 1 d . . . . . 
H27A H 0.626689 0.456318 0.891665 0.052 Uiso 1 1 calc R U . . . 
H27B H 0.813176 0.489446 0.959577 0.052 Uiso 1 1 calc R U . . . 
C28 C 0.9258(14) 0.4400(3) 0.6330(7) 0.0310(18) Uani 1 1 d . . . . . 
H28 H 1.066940 0.459986 0.635265 0.037 Uiso 1 1 calc R U . . . 
C29 C 0.9384(12) 0.4045(3) 0.5357(6) 0.0241(15) Uani 1 1 d . . . . . 
C30 C 1.1304(15) 0.4025(3) 0.4693(6) 0.0295(18) Uani 1 1 d . . . . . 
H30 H 1.249805 0.425117 0.482109 0.035 Uiso 1 1 calc R U . . . 
C31 C 1.1483(13) 0.3673(3) 0.3838(6) 0.0295(17) Uani 1 1 d . . . . . 
H31 H 1.275233 0.367318 0.336517 0.035 Uiso 1 1 calc R U . . . 
C32 C 0.9820(15) 0.3330(3) 0.3693(6) 0.0274(17) Uani 1 1 d . . . . . 
C33 C 0.7872(14) 0.3344(3) 0.4340(7) 0.0330(18) Uani 1 1 d . . . . . 
H33 H 0.669876 0.311104 0.422123 0.040 Uiso 1 1 calc R U . . . 
C34 C 0.7690(14) 0.3706(3) 0.5160(8) 0.038(2) Uani 1 1 d . . . . . 
H34 H 0.636741 0.371889 0.559466 0.045 Uiso 1 1 calc R U . . . 
C35 C 0.8566(17) 0.2595(3) 0.2744(8) 0.043(2) Uani 1 1 d . . . . . 
H35A H 0.834136 0.244081 0.346774 0.065 Uiso 1 1 calc R U . . . 
H35B H 0.911678 0.234567 0.222107 0.065 Uiso 1 1 calc R U . . . 
H35C H 0.714024 0.273072 0.247675 0.065 Uiso 1 1 calc R U . . . 
C36 C 0.7306(15) 0.4751(3) 0.6195(6) 0.0314(18) Uani 1 1 d . . . . . 
C37 C 0.6219(14) 0.5550(3) 0.5654(6) 0.0286(17) Uani 1 1 d . . . . . 
C38 C 0.6334(15) 0.5955(3) 0.6313(6) 0.0308(18) Uani 1 1 d . . . . . 
C39 C 0.4629(15) 0.6305(3) 0.6296(6) 0.0331(18) Uani 1 1 d . . . . . 
C40 C 0.2836(13) 0.6247(3) 0.5619(7) 0.0306(17) Uani 1 1 d . . . . . 
C41 C 0.2737(13) 0.5844(3) 0.4924(7) 0.0282(17) Uani 1 1 d . . . . . 
C42 C 0.4405(13) 0.5493(3) 0.4928(6) 0.0256(16) Uani 1 1 d . . . . . 
N1 N 0.8961(14) 0.6936(3) -0.0417(8) 0.052(2) Uani 1 1 d . . . . . 
N2 N 1.386(2) 0.3273(5) 0.7687(11) 0.037(4) Uiso 0.470(9) 1 d D . P A 1 
N2A N 1.115(4) 0.2843(3) 0.7605(11) 0.070(5) Uiso 0.530(9) 1 d D . P A 2 
O1 O 0.4898(10) 0.7307(2) 0.4511(5) 0.0393(14) Uani 1 1 d . . . . . 
O2 O 0.0217(10) 0.56030(19) 0.0973(5) 0.0341(13) Uani 1 1 d . . . . . 
O3 O 0.2786(9) 0.50827(19) 0.1687(4) 0.0295(12) Uani 1 1 d . . . . . 
O4 O 1.0192(11) 0.2993(2) 0.2840(5) 0.0368(14) Uani 1 1 d . . . . . 
O5 O 0.5402(10) 0.4668(2) 0.6446(5) 0.0356(13) Uani 1 1 d . . . . . 
O6 O 0.7928(9) 0.51919(19) 0.5698(5) 0.0368(14) Uani 1 1 d . . . . . 
F1 F 0.3432(9) 0.42710(18) 0.0434(4) 0.0439(12) Uani 1 1 d . . . . . 
F2 F 0.0462(10) 0.35154(16) 0.0358(4) 0.0471(13) Uani 1 1 d . . . . . 
F3 F -0.3410(8) 0.35727(17) 0.1528(4) 0.0416(12) Uani 1 1 d . . . . . 
F4 F -0.4174(7) 0.43648(15) 0.2839(4) 0.0333(10) Uani 1 1 d . . . . . 
F5 F -0.1168(8) 0.51150(16) 0.2967(4) 0.0346(10) Uani 1 1 d . . . . . 
F6 F 0.8060(9) 0.60080(17) 0.7024(4) 0.0419(12) Uani 1 1 d . . . . . 
F7 F 0.4755(9) 0.66990(17) 0.7000(4) 0.0442(13) Uani 1 1 d . . . . . 
F8 F 0.1182(8) 0.65828(17) 0.5600(4) 0.0392(11) Uani 1 1 d . . . . . 
F9 F 0.0969(8) 0.57925(18) 0.4248(4) 0.0392(11) Uani 1 1 d . . . . . 
F10 F 0.4291(8) 0.51018(16) 0.4255(4) 0.0383(11) Uani 1 1 d . . . . . 
S1 S 0.4837(4) 0.71710(8) -0.0175(3) 0.0556(8) Uani 1 1 d . . . . . 
S2 S 0.9631(9) 0.31076(16) 0.7775(4) 0.0392(14) Uiso 0.470(9) 1 d D . P A 1 
S2A S 1.3246(8) 0.36328(19) 0.7671(4) 0.0495(15) Uiso 0.530(9) 1 d D . P A 2 
  
loop_ 
 _atom_site_aniso_label 
 _atom_site_aniso_U_11 
 _atom_site_aniso_U_22 
 _atom_site_aniso_U_33 
 _atom_site_aniso_U_23 
 _atom_site_aniso_U_13 
 _atom_site_aniso_U_12 
C1 0.030(4) 0.028(4) 0.024(4) 0.001(3) -0.005(3) -0.003(3) 
C2 0.032(4) 0.041(4) 0.022(4) 0.004(3) -0.003(3) -0.008(3) 
C3 0.024(4) 0.045(5) 0.077(7) 0.023(5) 0.005(5) 0.004(4) 
C4 0.047(6) 0.050(5) 0.044(5) 0.001(4) 0.006(5) -0.025(4) 
C5 0.039(5) 0.039(4) 0.039(5) 0.006(4) 0.001(4) -0.010(4) 
C6 0.047(6) 0.054(6) 0.046(6) -0.005(4) 0.001(5) -0.016(5) 
C7 0.021(4) 0.028(4) 0.039(4) 0.003(3) 0.003(4) 0.002(3) 
C8 0.022(4) 0.027(4) 0.035(4) 0.003(3) 0.003(3) 0.002(3) 
C9 0.020(4) 0.024(3) 0.040(4) -0.002(3) 0.010(4) 0.000(3) 
C10 0.019(4) 0.040(4) 0.027(4) 0.000(3) 0.003(3) 0.002(3) 
C11 0.018(4) 0.028(4) 0.052(5) 0.002(4) 0.002(4) -0.004(3) 
C12 0.022(4) 0.036(4) 0.034(4) -0.001(3) -0.002(4) 0.006(3) 
C13 0.018(4) 0.047(5) 0.025(4) 0.002(4) 0.001(3) 0.005(3) 
C14 0.034(5) 0.044(5) 0.058(6) -0.025(4) 0.005(5) -0.004(4) 
C15 0.031(5) 0.024(4) 0.040(5) -0.003(3) 0.009(4) -0.005(3) 
C16 0.039(5) 0.019(3) 0.042(5) 0.002(3) -0.002(4) -0.002(3) 
C17 0.027(4) 0.036(4) 0.036(4) 0.006(3) 0.009(4) 0.005(3) 
C18 0.035(5) 0.016(3) 0.050(5) -0.001(3) -0.004(4) 0.005(3) 
C19 0.031(5) 0.028(4) 0.043(5) 0.007(3) -0.006(4) -0.002(3) 
C20 0.019(4) 0.034(4) 0.041(5) 0.006(4) -0.008(4) 0.000(3) 
C21 0.027(4) 0.025(3) 0.034(4) 0.001(3) -0.006(4) 0.000(3) 
C22 0.024(4) 0.027(4) 0.037(4) 0.004(3) -0.010(4) 0.002(3) 
C26 0.042(5) 0.031(4) 0.047(5) -0.005(4) 0.009(4) -0.009(4) 
C27 0.058(6) 0.040(5) 0.030(5) -0.003(4) -0.003(4) 0.008(4) 
C28 0.021(4) 0.026(4) 0.045(5) -0.002(3) -0.003(4) -0.002(3) 
C29 0.018(4) 0.031(4) 0.023(4) 0.005(3) -0.003(3) 0.003(3) 
C30 0.041(5) 0.030(4) 0.018(3) 0.002(3) 0.002(4) -0.004(3) 
C31 0.018(4) 0.042(4) 0.029(4) 0.006(3) 0.004(3) 0.001(3) 
C32 0.043(5) 0.029(4) 0.011(3) -0.001(3) -0.004(3) 0.000(3) 
C33 0.030(4) 0.027(4) 0.042(5) 0.000(3) 0.002(4) -0.005(3) 
C34 0.021(4) 0.040(4) 0.052(5) 0.004(4) 0.003(4) -0.002(3) 
C35 0.055(6) 0.029(4) 0.045(5) 0.001(4) 0.004(5) -0.003(4) 
C36 0.036(5) 0.036(4) 0.022(4) 0.002(3) -0.002(4) -0.008(4) 
C37 0.027(4) 0.035(4) 0.024(4) 0.006(3) 0.004(3) 0.004(3) 
C38 0.034(5) 0.040(4) 0.018(4) 0.004(3) 0.005(3) -0.006(4) 
C39 0.038(5) 0.035(4) 0.026(4) -0.005(3) 0.002(4) 0.000(4) 
C40 0.023(4) 0.030(4) 0.039(4) 0.003(3) -0.003(4) 0.002(3) 
C41 0.029(4) 0.027(4) 0.028(4) 0.007(3) -0.014(3) -0.005(3) 
C42 0.023(4) 0.026(3) 0.028(4) 0.002(3) 0.002(3) -0.003(3) 
N1 0.037(5) 0.058(5) 0.061(5) 0.021(4) 0.001(4) -0.010(4) 
O1 0.024(3) 0.042(3) 0.052(4) -0.012(3) 0.008(3) -0.003(2) 
O2 0.025(3) 0.031(3) 0.046(3) 0.002(2) -0.002(3) -0.003(2) 
O3 0.025(3) 0.033(3) 0.031(3) 0.008(2) -0.005(2) -0.002(2) 
O4 0.043(4) 0.036(3) 0.032(3) -0.001(2) 0.005(3) -0.001(3) 
O5 0.029(3) 0.035(3) 0.043(3) 0.006(3) 0.004(3) -0.005(2) 
O6 0.028(3) 0.027(3) 0.056(4) -0.003(3) 0.007(3) 0.002(2) 
F1 0.034(3) 0.044(3) 0.053(3) 0.003(2) 0.012(2) 0.007(2) 
F2 0.063(4) 0.029(2) 0.049(3) -0.004(2) 0.008(3) 0.005(2) 
F3 0.040(3) 0.029(2) 0.055(3) 0.005(2) -0.004(3) -0.010(2) 
F4 0.022(2) 0.035(2) 0.044(3) 0.004(2) 0.007(2) -0.0007(18) 
F5 0.033(3) 0.032(2) 0.039(3) -0.005(2) 0.005(2) -0.001(2) 
F6 0.041(3) 0.038(3) 0.047(3) 0.000(2) -0.008(3) -0.001(2) 
F7 0.052(3) 0.036(2) 0.044(3) -0.009(2) -0.004(3) 0.002(2) 
F8 0.036(3) 0.040(3) 0.042(3) -0.001(2) -0.008(2) 0.008(2) 
F9 0.035(3) 0.044(3) 0.039(3) 0.003(2) -0.004(2) -0.006(2) 
F10 0.042(3) 0.032(2) 0.041(3) -0.001(2) -0.002(2) -0.002(2) 
S1 0.0452(14) 0.0290(10) 0.093(2) -0.0010(11) 0.0190(14) -0.0068(10) 
  
_geom_special_details 
; 
 All esds (except the esd in the dihedral angle between two l.s. planes) 
 are estimated using the full covariance matrix.  The cell esds are taken 
 into account individually in the estimation of esds in distances, angles 
 and torsion angles; correlations between esds in cell parameters are only 
 used when they are defined by crystal symmetry.  An approximate (isotropic) 
 treatment of cell esds is used for estimating esds involving l.s. planes. 
; 
  
loop_ 
 _geom_bond_atom_site_label_1 
 _geom_bond_atom_site_label_2 
 _geom_bond_distance 
 _geom_bond_site_symmetry_2 
 _geom_bond_publ_flag 
C1 C5 1.491(12) . ? 
C1 C2 1.500(10) . ? 
C1 C7 1.596(10) . ? 
C1 H1 1.0000 . ? 
C2 C3 1.375(12) . ? 
C2 S1 1.698(8) . ? 
C3 N1 1.335(12) . ? 
C3 H3 0.9500 . ? 
C4 N1 1.296(13) . ? 
C4 S1 1.729(10) . ? 
C4 H4 0.9500 . ? 
C5 C6 1.321(13) . ? 
C5 H5 0.9500 . ? 
C6 H6A 0.9500 . ? 
C6 H6B 0.9500 . ? 
C7 C15 1.506(11) . ? 
C7 C8 1.508(11) . ? 
C7 H7 1.0000 . ? 
C8 C9 1.374(11) . ? 
C8 C13 1.383(10) . ? 
C9 C10 1.381(11) . ? 
C9 H9 0.9500 . ? 
C10 C11 1.403(11) . ? 
C10 H10 0.9500 . ? 
C11 O1 1.340(10) . ? 
C11 C12 1.389(12) . ? 
C12 C13 1.397(11) . ? 
C12 H12 0.9500 . ? 
C13 H13 0.9500 . ? 
C14 O1 1.438(11) . ? 
C14 H14A 0.9800 . ? 
C14 H14B 0.9800 . ? 
C14 H14C 0.9800 . ? 
C15 O2 1.202(10) . ? 
C15 O3 1.374(9) . ? 
C16 C21 1.374(12) . ? 
C16 O3 1.383(10) . ? 
C16 C17 1.401(11) . ? 
C17 F1 1.336(9) . ? 
C17 C18 1.384(11) . ? 
C18 F2 1.326(9) . ? 
C18 C19 1.370(12) . ? 
C19 F3 1.347(9) . ? 
C19 C20 1.363(12) . ? 
C20 F4 1.327(9) . ? 
C20 C21 1.380(11) . ? 
C21 F5 1.341(9) . ? 
C22 C23 1.466(9) . ? 
C22 C26 1.512(11) . ? 
C22 C28 1.547(11) . ? 
C22 H22 1.0000 . ? 
C23 C25 1.376(7) . ? 
C23 C25A 1.395(7) . ? 
C23 S2 1.679(6) . ? 
C23 S2A 1.691(6) . ? 
C24a N2 1.315(7) . ? 
C24a S2 1.78(2) . ? 
C24a H24 0.9500 . ? 
C25a N2 1.334(7) . ? 
C25a H25 0.9500 . ? 
C24Ab N2A 1.35(3) . ? 
C24Ab S2A 1.683(19) . ? 
C24Ab H24A 0.9500 . ? 
C25Ab N2A 1.276(19) . ? 
C25Ab H25A 0.9500 . ? 
C26 C27 1.302(13) . ? 
C26 H26 0.9500 . ? 
C27 H27A 0.9500 . ? 
C27 H27B 0.9500 . ? 
C28 C36 1.508(11) . ? 
C28 C29 1.519(10) . ? 
C28 H28 1.0000 . ? 
C29 C34 1.384(11) . ? 
C29 C30 1.402(11) . ? 
C30 C31 1.408(11) . ? 
C30 H30 0.9500 . ? 
C31 C32 1.366(11) . ? 
C31 H31 0.9500 . ? 
C32 O4 1.392(9) . ? 
C32 C33 1.403(11) . ? 
C33 C34 1.395(12) . ? 
C33 H33 0.9500 . ? 
C34 H34 0.9500 . ? 
C35 O4 1.449(10) . ? 
C35 H35A 0.9800 . ? 
C35 H35B 0.9800 . ? 
C35 H35C 0.9800 . ? 
C36 O5 1.198(10) . ? 
C36 O6 1.381(9) . ? 
C37 C38 1.354(11) . ? 
C37 O6 1.403(9) . ? 
C37 C42 1.403(11) . ? 
C38 F6 1.350(10) . ? 
C38 C39 1.386(12) . ? 
C39 C40 1.357(12) . ? 
C39 F7 1.362(9) . ? 
C40 F8 1.338(9) . ? 
C40 C41 1.373(11) . ? 
C41 F9 1.342(9) . ? 
C41 C42 1.373(11) . ? 
C42 F10 1.332(8) . ? 
  
loop_ 
 _geom_angle_atom_site_label_1 
 _geom_angle_atom_site_label_2 
 _geom_angle_atom_site_label_3 
 _geom_angle 
 _geom_angle_site_symmetry_1 
 _geom_angle_site_symmetry_3 
 _geom_angle_publ_flag 
C5 C1 C2 110.5(7) . . ? 
C5 C1 C7 109.3(6) . . ? 
C2 C1 C7 111.0(6) . . ? 
C5 C1 H1 108.7 . . ? 
C2 C1 H1 108.7 . . ? 
C7 C1 H1 108.7 . . ? 
C3 C2 C1 128.0(8) . . ? 
C3 C2 S1 108.2(6) . . ? 
C1 C2 S1 123.8(6) . . ? 
N1 C3 C2 117.5(9) . . ? 
N1 C3 H3 121.3 . . ? 
C2 C3 H3 121.3 . . ? 
N1 C4 S1 114.7(7) . . ? 
N1 C4 H4 122.6 . . ? 
S1 C4 H4 122.6 . . ? 
C6 C5 C1 126.4(9) . . ? 
C6 C5 H5 116.8 . . ? 
C1 C5 H5 116.8 . . ? 
C5 C6 H6A 120.0 . . ? 
C5 C6 H6B 120.0 . . ? 
H6A C6 H6B 120.0 . . ? 
C15 C7 C8 112.6(7) . . ? 
C15 C7 C1 107.0(7) . . ? 
C8 C7 C1 112.9(6) . . ? 
C15 C7 H7 108.1 . . ? 
C8 C7 H7 108.1 . . ? 
C1 C7 H7 108.1 . . ? 
C9 C8 C13 118.5(7) . . ? 
C9 C8 C7 119.9(7) . . ? 
C13 C8 C7 121.3(7) . . ? 
C8 C9 C10 122.8(7) . . ? 
C8 C9 H9 118.6 . . ? 
C10 C9 H9 118.6 . . ? 
C9 C10 C11 119.0(8) . . ? 
C9 C10 H10 120.5 . . ? 
C11 C10 H10 120.5 . . ? 
O1 C11 C12 115.7(7) . . ? 
O1 C11 C10 125.7(8) . . ? 
C12 C11 C10 118.6(8) . . ? 
C11 C12 C13 121.1(7) . . ? 
C11 C12 H12 119.5 . . ? 
C13 C12 H12 119.5 . . ? 
C8 C13 C12 120.0(7) . . ? 
C8 C13 H13 120.0 . . ? 
C12 C13 H13 120.0 . . ? 
O1 C14 H14A 109.5 . . ? 
O1 C14 H14B 109.5 . . ? 
H14A C14 H14B 109.5 . . ? 
O1 C14 H14C 109.5 . . ? 
H14A C14 H14C 109.5 . . ? 
H14B C14 H14C 109.5 . . ? 
O2 C15 O3 121.5(7) . . ? 
O2 C15 C7 127.4(7) . . ? 
O3 C15 C7 111.1(7) . . ? 
C21 C16 O3 125.0(7) . . ? 
C21 C16 C17 117.7(7) . . ? 
O3 C16 C17 117.3(7) . . ? 
F1 C17 C18 119.4(7) . . ? 
F1 C17 C16 119.2(7) . . ? 
C18 C17 C16 121.4(7) . . ? 
F2 C18 C19 121.5(7) . . ? 
F2 C18 C17 119.8(8) . . ? 
C19 C18 C17 118.7(7) . . ? 
F3 C19 C20 119.8(8) . . ? 
F3 C19 C18 119.0(7) . . ? 
C20 C19 C18 121.2(8) . . ? 
F4 C20 C19 120.0(7) . . ? 
F4 C20 C21 120.0(7) . . ? 
C19 C20 C21 120.0(8) . . ? 
F5 C21 C16 119.4(7) . . ? 
F5 C21 C20 119.5(7) . . ? 
C16 C21 C20 121.1(7) . . ? 
C23 C22 C26 113.5(7) . . ? 
C23 C22 C28 111.0(6) . . ? 
C26 C22 C28 109.9(6) . . ? 
C23 C22 H22 107.4 . . ? 
C26 C22 H22 107.4 . . ? 
C28 C22 H22 107.4 . . ? 
C25a C23 C22 126.0(8) . . ? 
C25Ab C23 C22 126.2(8) . . ? 
C25a C23 S2 107.1(8) . . ? 
C22 C23 S2 126.4(5) . . ? 
C25Ab C23 S2A 101.8(8) . . ? 
C22 C23 S2A 132.0(5) . . ? 
N2a C24a S2 110.9(14) . . ? 
N2a C24a H24 124.6 . . ? 
S2a C24a H24 124.6 . . ? 
N2a C25a C23 119.5(13) . . ? 
N2a C25a H25 120.3 . . ? 
C23 C25a H25 120.3 . . ? 
N2Ab C24Ab S2A 108.3(11) . . ? 
N2Ab C24Ab H24A 125.8 . . ? 
S2Ab C24Ab H24A 125.8 . . ? 
N2Ab C25Ab C23 121.2(14) . . ? 
N2Ab C25Ab H25A 119.4 . . ? 
C23 C25Ab H25A 119.4 . . ? 
C27 C26 C22 124.8(9) . . ? 
C27 C26 H26 117.6 . . ? 
C22 C26 H26 117.6 . . ? 
C26 C27 H27A 120.0 . . ? 
C26 C27 H27B 120.0 . . ? 
H27A C27 H27B 120.0 . . ? 
C36 C28 C29 110.3(6) . . ? 
C36 C28 C22 107.9(7) . . ? 
C29 C28 C22 113.1(6) . . ? 
C36 C28 H28 108.4 . . ? 
C29 C28 H28 108.4 . . ? 
C22 C28 H28 108.4 . . ? 
C34 C29 C30 118.2(7) . . ? 
C34 C29 C28 120.8(7) . . ? 
C30 C29 C28 120.8(7) . . ? 
C29 C30 C31 120.7(7) . . ? 
C29 C30 H30 119.6 . . ? 
C31 C30 H30 119.6 . . ? 
C32 C31 C30 119.6(7) . . ? 
C32 C31 H31 120.2 . . ? 
C30 C31 H31 120.2 . . ? 
C31 C32 O4 114.7(7) . . ? 
C31 C32 C33 120.8(7) . . ? 
O4 C32 C33 124.4(7) . . ? 
C34 C33 C32 118.8(7) . . ? 
C34 C33 H33 120.6 . . ? 
C32 C33 H33 120.6 . . ? 
C29 C34 C33 121.8(8) . . ? 
C29 C34 H34 119.1 . . ? 
C33 C34 H34 119.1 . . ? 
O4 C35 H35A 109.5 . . ? 
O4 C35 H35B 109.5 . . ? 
H35A C35 H35B 109.5 . . ? 
O4 C35 H35C 109.5 . . ? 
H35A C35 H35C 109.5 . . ? 
H35B C35 H35C 109.5 . . ? 
O5 C36 O6 121.7(8) . . ? 
O5 C36 C28 126.0(7) . . ? 
O6 C36 C28 112.2(7) . . ? 
C38 C37 O6 119.6(8) . . ? 
C38 C37 C42 119.7(7) . . ? 
O6 C37 C42 120.6(7) . . ? 
F6 C38 C37 119.9(7) . . ? 
F6 C38 C39 119.9(7) . . ? 
C37 C38 C39 120.1(8) . . ? 
C40 C39 F7 120.7(7) . . ? 
C40 C39 C38 120.6(7) . . ? 
F7 C39 C38 118.6(8) . . ? 
F8 C40 C39 120.9(7) . . ? 
F8 C40 C41 119.4(7) . . ? 
C39 C40 C41 119.6(7) . . ? 
F9 C41 C42 120.0(7) . . ? 
F9 C41 C40 119.3(7) . . ? 
C42 C41 C40 120.7(7) . . ? 
F10 C42 C41 120.4(7) . . ? 
F10 C42 C37 120.5(7) . . ? 
C41 C42 C37 119.1(7) . . ? 
C4 N1 C3 110.0(8) . . ? 
C24a N2a C25 111.0(15) . . ? 
C25Ab N2Ab C24A 112.4(11) . . ? 
C11 O1 C14 117.1(6) . . ? 
C15 O3 C16 116.2(6) . . ? 
C32 O4 C35 115.7(7) . . ? 
C36 O6 C37 114.2(6) . . ? 
C2 S1 C4 89.5(4) . . ? 
C23 S2a C24 91.5(6) . . ? 
C24Ab S2Ab C23 96.3(6) . . ? 
  
_refine_diff_density_max    0.449 
_refine_diff_density_min   -0.331 
_refine_diff_density_rms    0.062 
  
_shelx_res_file 
; 
TITL hartwig133_0ma_a.res in P2(1) 
 shelx.res created by SHELXL-2016/4 at 09:11:52 on 10-Aug-2016 
CELL  1.54178   5.9674  26.9049  12.1120   90.000   90.059   90.000 
ZERR     4.00   0.0003   0.0015   0.0007    0.000    0.004    0.000 
LATT  -1 
SYMM  - X, 1/2 + Y, - Z 
SFAC  C    H    N    O    F    S 
UNIT  84 56 4 12 20 4 
MERG   2 
TWIN    1.00  0.00  0.00  0.00 -1.00  0.00  0.00  0.00 -1.00   2 
EADP C25 S2A 
EADP C25A S2 
DFIX     1.370   0.005 C23 C25 
DFIX     1.330   0.005 C25 N2 
DFIX     1.320   0.005 N2 C24 
DFIX     1.380   0.005 C23 C25A 
DFIX     1.720   0.005 C23 S2 
DFIX     1.720   0.005 C23 S2A 
DANG     2.310   0.005 C23 N2A 
EADP C24 C24A 
DANG     2.190   0.005 C25A C24A 
FLAT     0.005 C23 C24A C25A N2A S2A 
FLAT     0.005 C23 C24 C25 N2 S2 
FMAP   2 
PLAN   20 
SIZE     0.030   0.030   0.060 
ACTA   134.00 
BOND   $H 
LIST   4 
WPDB  -2 
L.S.  10 
TEMP  -173.00 
WGHT    0.035400    3.222600 
BASF   0.33198 
FVAR       0.19739   0.47023 
C1    1    0.382802    0.614787   -0.004601    11.00000    0.03024    0.02827 = 
         0.02359    0.00087   -0.00519   -0.00326 
AFIX  13 
H1    2    0.229046    0.629411   -0.009435    11.00000   -1.20000 
AFIX   0 
C2    1    0.551287    0.655780   -0.016930    11.00000    0.03215    0.04079 = 
         0.02222    0.00414   -0.00285   -0.00775 
C3    1    0.779507    0.651679   -0.029241    11.00000    0.02405    0.04470 = 
         0.07680    0.02308    0.00467    0.00415 
AFIX  43 
H3    2    0.851484    0.620185   -0.028901    11.00000   -1.20000 
AFIX   0 
C4    1    0.763558    0.731680   -0.035206    11.00000    0.04749    0.04998 = 
         0.04449    0.00118    0.00650   -0.02530 
AFIX  43 
H4    2    0.816010    0.764953   -0.039799    11.00000   -1.20000 
AFIX   0 
C5    1    0.409241    0.577467   -0.094660    11.00000    0.03940    0.03852 = 
         0.03937    0.00606    0.00079   -0.00960 
AFIX  43 
H5    2    0.553448    0.563003   -0.103062    11.00000   -1.20000 
AFIX   0 
C6    1    0.251864    0.562532   -0.163927    11.00000    0.04711    0.05357 = 
         0.04639   -0.00506    0.00139   -0.01552 
AFIX  93 
H6A   2    0.104864    0.575892   -0.158898    11.00000   -1.20000 
H6B   2    0.285706    0.538435   -0.218761    11.00000   -1.20000 
AFIX   0 
C7    1    0.408892    0.587730    0.111979    11.00000    0.02053    0.02797 = 
         0.03892    0.00315    0.00294    0.00242 
AFIX  13 
H7    2    0.549203    0.567426    0.110143    11.00000   -1.20000 
AFIX   0 
C8    1    0.426518    0.623763    0.206964    11.00000    0.02169    0.02682 = 
         0.03487    0.00291    0.00284    0.00200 
C9    1    0.622871    0.627183    0.265894    11.00000    0.02006    0.02395 = 
         0.03990   -0.00216    0.01046   -0.00032 
AFIX  43 
H9    2    0.740909    0.604722    0.249200    11.00000   -1.20000 
AFIX   0 
C10   1    0.655865    0.661892    0.348361    11.00000    0.01924    0.04020 = 
         0.02669    0.00027    0.00268    0.00176 
AFIX  43 
H10   2    0.793888    0.663196    0.387410    11.00000   -1.20000 
AFIX   0 
C11   1    0.482304    0.695198    0.373556    11.00000    0.01816    0.02840 = 
         0.05224    0.00236    0.00227   -0.00408 
C12   1    0.282825    0.691777    0.314837    11.00000    0.02245    0.03641 = 
         0.03366   -0.00143   -0.00218    0.00583 
AFIX  43 
H12   2    0.162096    0.713307    0.332849    11.00000   -1.20000 
AFIX   0 
C13   1    0.256794    0.657198    0.229729    11.00000    0.01805    0.04692 = 
         0.02507    0.00230    0.00103    0.00521 
AFIX  43 
H13   2    0.122545    0.656659    0.187522    11.00000   -1.20000 
AFIX   0 
C14   1    0.701883    0.739014    0.504555    11.00000    0.03384    0.04420 = 
         0.05776   -0.02494    0.00464   -0.00375 
AFIX 137 
H14A  2    0.750150    0.708448    0.541610    11.00000   -1.50000 
H14B  2    0.686299    0.765676    0.559137    11.00000   -1.50000 
H14C  2    0.813708    0.748591    0.449306    11.00000   -1.50000 
AFIX   0 
C15   1    0.213117    0.552769    0.123475    11.00000    0.03101    0.02389 = 
         0.04014   -0.00263    0.00896   -0.00537 
C16   1    0.118810    0.471067    0.170708    11.00000    0.03914    0.01939 = 
         0.04247    0.00180   -0.00208   -0.00208 
C17   1    0.158225    0.429009    0.105347    11.00000    0.02682    0.03579 = 
         0.03588    0.00597    0.00928    0.00482 
C18   1    0.005421    0.390372    0.100217    11.00000    0.03537    0.01638 = 
         0.04995   -0.00075   -0.00419    0.00475 
C19   1   -0.187643    0.393816    0.160775    11.00000    0.03058    0.02795 = 
         0.04295    0.00669   -0.00649   -0.00224 
C20   1   -0.230741    0.434407    0.224624    11.00000    0.01889    0.03350 = 
         0.04129    0.00565   -0.00759   -0.00008 
C21   1   -0.076628    0.472561    0.230510    11.00000    0.02695    0.02491 = 
         0.03421    0.00137   -0.00609   -0.00009 
C22   1    0.898787    0.413101    0.745110    11.00000    0.02367    0.02697 = 
         0.03700    0.00390   -0.00967    0.00186 
AFIX  13 
H22   2    0.740368    0.401176    0.749819    11.00000   -1.20000 
AFIX   0 
C23   1    1.044321    0.369304    0.751192    11.00000    0.04042 
PART    1 
C24   1    1.246809    0.290246    0.785661    21.00000    0.03668 
AFIX  43 
H24   2    1.291338    0.256989    0.800289    21.00000   -1.20000 
AFIX   0 
C25   1    1.274885    0.369540    0.750278    21.00000    0.04952 
AFIX  43 
H25   2    1.354229    0.399526    0.736645    21.00000   -1.20000 
AFIX   0 
PART    2 
C24A  1    1.327480    0.300755    0.771149   -21.00000    0.03668 
AFIX  43 
H24A  2    1.456726    0.280483    0.779548   -21.00000   -1.20000 
AFIX   0 
C25A  1    0.974696    0.319810    0.750355   -21.00000    0.03919 
AFIX  43 
H25A  2    0.819945    0.312383    0.742110   -21.00000   -1.20000 
AFIX   0 
PART    0 
C26   1    0.935006    0.449466    0.838609    11.00000    0.04159    0.03135 = 
         0.04714   -0.00525    0.00947   -0.00885 
AFIX  43 
H26   2    1.083688    0.460618    0.851809    11.00000   -1.20000 
AFIX   0 
C27   1    0.777424    0.466623    0.902362    11.00000    0.05810    0.04022 = 
         0.03044   -0.00284   -0.00335    0.00839 
AFIX  93 
H27A  2    0.626689    0.456318    0.891665    11.00000   -1.20000 
H27B  2    0.813176    0.489446    0.959577    11.00000   -1.20000 
AFIX   0 
C28   1    0.925751    0.439989    0.633037    11.00000    0.02116    0.02637 = 
         0.04532   -0.00214   -0.00310   -0.00231 
AFIX  13 
H28   2    1.066940    0.459986    0.635265    11.00000   -1.20000 
AFIX   0 
C29   1    0.938374    0.404539    0.535659    11.00000    0.01800    0.03089 = 
         0.02326    0.00474   -0.00345    0.00330 
C30   1    1.130400    0.402482    0.469278    11.00000    0.04050    0.03006 = 
         0.01805    0.00207    0.00244   -0.00423 
AFIX  43 
H30   2    1.249805    0.425117    0.482109    11.00000   -1.20000 
AFIX   0 
C31   1    1.148324    0.367252    0.383807    11.00000    0.01783    0.04185 = 
         0.02877    0.00565    0.00428    0.00096 
AFIX  43 
H31   2    1.275233    0.367318    0.336517    11.00000   -1.20000 
AFIX   0 
C32   1    0.982040    0.332976    0.369325    11.00000    0.04299    0.02876 = 
         0.01056   -0.00145   -0.00433    0.00029 
C33   1    0.787221    0.334368    0.433968    11.00000    0.02985    0.02706 = 
         0.04215   -0.00007    0.00192   -0.00500 
AFIX  43 
H33   2    0.669876    0.311104    0.422123    11.00000   -1.20000 
AFIX   0 
C34   1    0.768996    0.370552    0.515975    11.00000    0.02108    0.04018 = 
         0.05165    0.00402    0.00332   -0.00225 
AFIX  43 
H34   2    0.636741    0.371889    0.559466    11.00000   -1.20000 
AFIX   0 
C35   1    0.856603    0.259538    0.274362    11.00000    0.05542    0.02861 = 
         0.04531    0.00097    0.00443   -0.00274 
AFIX 137 
H35A  2    0.834136    0.244081    0.346774    11.00000   -1.50000 
H35B  2    0.911678    0.234567    0.222107    11.00000   -1.50000 
H35C  2    0.714024    0.273072    0.247675    11.00000   -1.50000 
AFIX   0 
C36   1    0.730611    0.475097    0.619455    11.00000    0.03637    0.03604 = 
         0.02179    0.00153   -0.00154   -0.00799 
C37   1    0.621905    0.554958    0.565431    11.00000    0.02689    0.03481 = 
         0.02401    0.00634    0.00427    0.00376 
C38   1    0.633444    0.595534    0.631280    11.00000    0.03382    0.04027 = 
         0.01841    0.00370    0.00531   -0.00561 
C39   1    0.462939    0.630499    0.629624    11.00000    0.03818    0.03527 = 
         0.02585   -0.00498    0.00165    0.00002 
C40   1    0.283579    0.624712    0.561853    11.00000    0.02302    0.02963 = 
         0.03927    0.00250   -0.00298    0.00228 
C41   1    0.273674    0.584415    0.492418    11.00000    0.02900    0.02720 = 
         0.02826    0.00696   -0.01394   -0.00457 
C42   1    0.440451    0.549277    0.492801    11.00000    0.02299    0.02630 = 
         0.02755    0.00202    0.00167   -0.00269 
N1    3    0.896139    0.693644   -0.041692    11.00000    0.03698    0.05775 = 
         0.06117    0.02144    0.00058   -0.01014 
PART    1 
N2    3    1.386114    0.327345    0.768681    21.00000    0.03714 
PART    2 
N2A   3    1.115092    0.284347    0.760463   -21.00000    0.07044 
PART    0 
O1    4    0.489782    0.730687    0.451145    11.00000    0.02399    0.04185 = 
         0.05206   -0.01168    0.00785   -0.00303 
O2    4    0.021703    0.560298    0.097334    11.00000    0.02545    0.03129 = 
         0.04566    0.00231   -0.00206   -0.00321 
O3    4    0.278623    0.508268    0.168748    11.00000    0.02472    0.03292 = 
         0.03074    0.00802   -0.00538   -0.00244 
O4    4    1.019212    0.299307    0.284016    11.00000    0.04301    0.03597 = 
         0.03155   -0.00138    0.00504   -0.00084 
O5    4    0.540199    0.466825    0.644631    11.00000    0.02889    0.03490 = 
         0.04287    0.00620    0.00386   -0.00489 
O6    4    0.792772    0.519189    0.569758    11.00000    0.02768    0.02674 = 
         0.05599   -0.00283    0.00684    0.00193 
F1    5    0.343175    0.427099    0.043388    11.00000    0.03389    0.04432 = 
         0.05349    0.00297    0.01204    0.00676 
F2    5    0.046248    0.351536    0.035849    11.00000    0.06261    0.02949 = 
         0.04929   -0.00373    0.00763    0.00475 
F3    5   -0.341016    0.357270    0.152770    11.00000    0.03999    0.02940 = 
         0.05548    0.00457   -0.00373   -0.01026 
F4    5   -0.417409    0.436484    0.283939    11.00000    0.02151    0.03476 = 
         0.04369    0.00380    0.00659   -0.00070 
F5    5   -0.116781    0.511503    0.296697    11.00000    0.03299    0.03181 = 
         0.03908   -0.00522    0.00458   -0.00080 
F6    5    0.806046    0.600805    0.702408    11.00000    0.04102    0.03787 = 
         0.04683    0.00010   -0.00798   -0.00114 
F7    5    0.475522    0.669902    0.699969    11.00000    0.05248    0.03648 = 
         0.04368   -0.00908   -0.00379    0.00163 
F8    5    0.118155    0.658284    0.560047    11.00000    0.03594    0.03966 = 
         0.04188   -0.00135   -0.00818    0.00780 
F9    5    0.096858    0.579245    0.424795    11.00000    0.03474    0.04369 = 
         0.03924    0.00344   -0.00440   -0.00628 
F10   5    0.429108    0.510179    0.425548    11.00000    0.04209    0.03236 = 
         0.04052   -0.00142   -0.00218   -0.00156 
S1    6    0.483732    0.717104   -0.017539    11.00000    0.04518    0.02897 = 
         0.09283   -0.00101    0.01902   -0.00678 
PART    1 
S2    6    0.963141    0.310763    0.777535    21.00000    0.03919 
PART    2 
S2A   6    1.324572    0.363281    0.767070   -21.00000    0.04952 
HKLF    4 
  
  
  
  
REM  hartwig133_0ma_a.res in P2(1) 
REM R1 =  0.0526 for    6612 Fo > 4sig(Fo)  and  0.0548 for all    6869 data 
REM    551 parameters refined using     13 restraints 
  
END 
  
WGHT      0.0327      3.3040 
  
REM Highest difference peak  0.449,  deepest hole -0.331,  1-sigma level  0.062 
Q1    1   0.9917  0.3116  0.7253  11.00000  0.05    0.45 
Q2    1   1.0982  0.2761  0.7922  11.00000  0.05    0.38 
Q3    1   0.9732  0.3117  0.8315  11.00000  0.05    0.38 
Q4    1   1.0082  0.2975  0.3695  11.00000  0.05    0.32 
Q5    1   0.4494  0.5107  0.4994  11.00000  0.05    0.32 
Q6    1   1.0148  0.3522  0.7555  11.00000  0.05    0.29 
Q7    1   1.0808  0.3688  0.7753  11.00000  0.05    0.29 
Q8    1   0.4781  0.7520 -0.0070  11.00000  0.05    0.29 
Q9    1   0.5063  0.6830 -0.0036  11.00000  0.05    0.28 
Q10   1   1.3036  0.3563  0.7166  11.00000  0.05    0.27 
Q11   1   0.6358  0.6597  0.2679  11.00000  0.05    0.26 
Q12   1   0.3447  0.3772 -0.0179  11.00000  0.05    0.26 
Q13   1   0.3803  0.6146 -0.0747  11.00000  0.05    0.26 
Q14   1   0.4122  0.6194  0.1273  11.00000  0.05    0.24 
Q15   1   0.9364  0.4096  0.6261  11.00000  0.05    0.24 
Q16   1   0.9192  0.5761  0.7028  11.00000  0.05    0.23 
Q17   1   0.2973  0.5916  0.5662  11.00000  0.05    0.23 
Q18   1   0.9485  0.4015  0.4616  11.00000  0.05    0.23 
Q19   1  -0.0809  0.4438  0.2436  11.00000  0.05    0.22 
Q20   1   0.0182  0.5833  0.0192  11.00000  0.05    0.22 
; 
_shelx_res_checksum   77028 
  
_shelx_hkl_file 
; 
   1   0   0    1.04    0.22 
   1   0   0    0.65    0.17 
  -1   0   0    0.55    0.19 
  -1   0   0    0.32    0.11 
  -1   0   0    0.91    0.13 
  -1   0   0    0.80    0.12 
  -1   0   0    0.75    0.16 
  -1   0   0    0.61    0.18 
   1   0   0    0.73    0.24 
   1   0   0    0.87    0.23 
   1   0   0    0.80    0.23 
   2   0   0   24.13    1.88 
   2   0   0   26.25    1.68 
  -2   0   0   25.33    1.68 
   2   0   0   28.21    1.70 
  -2   0   0   27.70    1.70 
  -2   0   0   27.69    1.65 
  -2   0   0   26.03    1.64 
  -2   0   0   25.18    1.62 
  -3   0   0    7.72    0.75 
  -3   0   0    7.90    0.75 
  -3   0   0    7.81    0.60 
  -3   0   0    7.87    0.82 
   3   0   0    8.49    1.14 
   3   0   0    8.10    0.73 
  -4   0   0   17.22    1.20 
   4   0   0   14.27    1.73 
   4   0   0   16.74    1.43 
   5   0   0    5.00    0.93 
   5   0   0    4.59    0.42 
  -5   0   0    5.07    0.78 
   5   0   0    6.26    0.50 
   6   0   0    8.11    1.47 
   6   0   0    5.52    1.31 
   6   0   0    6.07    1.06 
   6   0   0    4.59    0.49 
   7   0   0    0.46    1.00 
  -1  -1   0    6.34    0.46 
   1  -1   0    6.85    0.46 
   1  -1   0    7.56    0.55 
   1  -1   0    7.88    0.55 
  -1  -1   0    5.86    0.51 
   1  -1   0    7.58    0.46 
  -1  -1   0    6.56    0.46 
   1  -1   0    7.15    0.53 
   1  -1   0    7.10    0.53 
   1  -1   0    7.37    0.53 
  -1  -1   0    6.20    0.52 
  -1  -1   0    6.43    0.50 
   1  -1   0    7.24    0.52 
   1   1   0    6.96    0.52 
  -1   1   0    7.83    0.48 
  -1   1   0    6.98    0.48 
   1   1   0    7.36    0.50 
   1   1   0    7.09    0.53 
   1   1   0    7.98    0.56 
  -1   1   0    7.14    0.51 
  -1   1   0    7.31    0.52 
  -1   1   0    7.17    0.47 
  -1   1   0    7.73    0.47 
  -1   1   0    6.63    0.54 
  -1   1   0    7.11    0.53 
   1   1   0    7.28    0.55 
   2  -1   0   46.92    2.87 
  -2  -1   0   45.42    2.81 
   2  -1   0   48.12    2.87 
   2  -1   0   42.26    2.85 
  -2  -1   0   45.57    2.85 
   2  -1   0   49.23    2.87 
  -2  -1   0   45.39    2.79 
  -2  -1   0   46.21    2.80 
   2  -1   0   41.05    2.99 
  -2  -1   0   44.78    2.85 
  -2   1   0   48.17    2.82 
  -2   1   0   45.80    2.82 
  -2   1   0   46.75    2.87 
   2   1   0   46.08    3.02 
   2   1   0   43.68    2.93 
  -2   1   0   47.93    2.82 
   2   1   0   49.69    2.86 
   2   1   0   46.00    2.84 
  -2   1   0   45.91    2.85 
  -3  -1   0   24.51    1.57 
  -3  -1   0   21.69    1.68 
  -3  -1   0   23.11    1.60 
   3  -1   0   21.65    1.55 
   3  -1   0   22.09    1.84 
  -3  -1   0   22.86    1.44 
  -3  -1   0   24.26    1.56 
  -3   1   0   21.60    1.62 
  -3   1   0   21.86    1.45 
  -3   1   0   20.83    1.57 
  -3   1   0   22.78    1.57 
   3   1   0   24.42    1.86 
   3   1   0   25.02    1.53 
   4  -1   0   19.43    1.58 
   4  -1   0   18.22    1.81 
  -4  -1   0   18.69    1.32 
  -4   1   0   18.80    1.32 
   4   1   0   20.44    1.62 
   4   1   0   17.36    1.82 
   5  -1   0   37.41    2.30 
   5  -1   0   39.81    2.53 
  -5  -1   0   37.27    2.49 
   5  -1   0   33.09    2.88 
   5  -1   0   39.05    2.34 
  -5   1   0   35.59    2.47 
   5   1   0   35.68    2.29 
   5   1   0   41.09    2.55 
   5   1   0   39.43    2.32 
   6  -1   0   28.45    2.32 
   6  -1   0   27.67    2.38 
   6  -1   0   28.31    2.07 
   6  -1   0   27.76    1.74 
   6   1   0   28.11    2.33 
   6   1   0   28.25    1.75 
   6   1   0   27.39    2.34 
   6   1   0   27.61    2.08 
   7  -1   0   -0.89    0.94 
   0  -2   0  157.29    9.71 
   0  -2   0  160.84    9.72 
   0  -2   0  157.08    9.69 
   0  -2   0  156.07    9.69 
   0  -2   0  165.20    9.69 
   0  -2   0  163.05    9.69 
   0  -2   0  153.30    9.70 
   0  -2   0  165.22    9.69 
   0  -2   0  158.36    9.71 
   0  -2   0  157.40    9.71 
   0  -2   0  163.67    9.69 
   0  -2   0  156.35    9.69 
   0   2   0  156.88    9.69 
   0   2   0  172.14    9.71 
   0   2   0  162.43    9.70 
   0   2   0  162.44    9.70 
   0   2   0  170.35    9.69 
   0   2   0  166.94    9.72 
   0   2   0  166.01    9.69 
   0   2   0  166.18    9.69 
   0   2   0  156.25    9.69 
  -1  -2   0  934.06   57.75 
  -1  -2   0  970.26   57.73 
  -1  -2   0  962.40   57.73 
  -1  -2   0  951.07   57.73 
   1  -2   0  959.43   57.77 
   1  -2   0  959.15   57.73 
  -1  -2   0  943.66   57.75 
   1  -2   0  951.82   57.80 
  -1  -2   0  922.66   57.76 
   1  -2   0  950.41   57.78 
   1  -2   0  968.40   57.77 
   1  -2   0  989.10   57.79 
   1  -2   0  976.61   57.73 
  -1  -2   0  978.43   57.75 
  -1  -2   0  993.36   57.74 
   1   2   0  946.84   57.77 
  -1   2   0  992.31   57.75 
   1   2   0  971.08   57.73 
  -1   2   0  961.49   57.74 
  -1   2   0  956.83   57.77 
  -1   2   0  947.56   57.76 
  -1   2   0 1000.00   57.74 
  -1   2   0  971.73   57.74 
   1   2   0  993.67   57.77 
   1   2   0  963.17   57.75 
   1   2   0  995.33   57.77 
   1   2   0  915.23   57.76 
  -1   2   0  957.65   57.78 
  -1   2   0  973.21   57.78 
   1   2   0  941.91   57.75 
  -1   2   0  990.21   57.74 
   1   2   0  959.19   57.73 
  -1   2   0  971.66   57.74 
   1   2   0  972.21   57.76 
   2  -2   0   45.63    2.96 
  -2  -2   0   45.77    2.89 
  -2  -2   0   46.64    2.90 
   2  -2   0   45.33    3.07 
  -2  -2   0   46.12    2.94 
   2  -2   0   49.39    2.96 
   2  -2   0   48.81    2.96 
  -2  -2   0   45.03    2.94 
  -2   2   0   46.89    2.91 
  -2   2   0   49.89    3.00 
   2   2   0   45.36    3.02 
   2   2   0   51.63    2.95 
  -2   2   0   47.94    2.97 
   2   2   0   46.81    2.93 
   2   2   0   47.62    3.07 
  -2   2   0   47.33    2.91 
  -2   2   0   50.32    2.95 
  -3  -2   0  111.97    6.80 
  -3  -2   0  112.07    6.82 
   3  -2   0  114.86    6.97 
   3  -2   0  112.47    6.78 
  -3  -2   0  108.98    6.70 
  -3  -2   0  114.67    6.80 
  -3  -2   0   98.61    6.86 
   3   2   0  109.62    6.96 
  -3   2   0  119.88    6.83 
  -3   2   0  103.97    6.85 
  -3   2   0  112.97    6.71 
  -3   2   0  112.37    6.80 
   3   2   0  110.08    6.77 
   4  -2   0   41.79    3.22 
  -4  -2   0   46.10    2.86 
   4  -2   0   44.67    2.99 
  -4   2   0   46.66    2.86 
   4   2   0   46.63    3.03 
   4   2   0   43.88    3.28 
   5  -2   0   16.96    1.49 
   5  -2   0   14.20    1.01 
  -5  -2   0   14.35    1.23 
   5  -2   0   16.33    1.35 
   5   2   0   17.65    1.03 
   5   2   0   15.07    1.01 
  -5   2   0   14.66    1.27 
   5   2   0   15.85    1.41 
   6  -2   0   37.60    2.70 
   6  -2   0   34.85    2.89 
   6  -2   0   41.60    2.45 
   6  -2   0   43.13    2.96 
   6   2   0   40.71    2.46 
   6   2   0   41.32    3.03 
   6   2   0   42.37    3.11 
   6   2   0   37.87    2.75 
   7  -2   0   -0.15    0.91 
   0  -3   0   -0.13    0.18 
   0  -3   0   -0.18    0.13 
   0  -3   0    0.12    0.18 
   0  -3   0    0.01    0.11 
   0  -3   0    0.14    0.17 
   0  -3   0    0.17    0.19 
   0  -3   0   -0.20    0.13 
   0  -3   0   -0.07    0.18 
   0  -3   0    0.20    0.12 
   0  -3   0   -0.05    0.15 
   0  -3   0   -0.05    0.20 
   0  -3   0   -0.09    0.16 
   0  -3   0    0.23    0.19 
   0   3   0    0.11    0.18 
   0   3   0    0.06    0.15 
   0   3   0    0.12    0.12 
   0   3   0   -0.02    0.21 
   0   3   0    0.07    0.12 
   0   3   0    0.21    0.14 
   0   3   0   -0.12    0.22 
   0   3   0    0.17    0.20 
   0   3   0    0.02    0.19 
   0   3   0   -0.03    0.14 
  -1  -3   0  209.23   12.14 
  -1  -3   0  207.90   12.15 
   1  -3   0  205.66   12.14 
   1  -3   0  206.87   12.21 
  -1  -3   0  201.31   12.14 
   1  -3   0  200.96   12.13 
   1  -3   0  202.85   12.14 
   1  -3   0  190.41   12.14 
  -1  -3   0  197.09   12.17 
   1  -3   0  205.50   12.14 
  -1  -3   0  197.89   12.18 
   1  -3   0  191.03   12.13 
   1  -3   0  195.80   12.14 
   1  -3   0  200.69   12.14 
  -1  -3   0  201.04   12.13 
   1  -3   0  208.10   12.20 
  -1  -3   0  201.58   12.18 
   1  -3   0  204.18   12.18 
   1  -3   0  201.53   12.14 
  -1  -3   0  203.68   12.18 
  -1  -3   0  201.89   12.14 
   1  -3   0  191.71   12.23 
  -1  -3   0  204.45   12.14 
  -1   3   0  199.12   12.16 
  -1   3   0  194.14   12.20 
  -1   3   0  202.24   12.14 
  -1   3   0  207.21   12.15 
  -1   3   0  195.91   12.18 
   1   3   0  205.97   12.13 
   1   3   0  209.21   12.19 
   1   3   0  208.31   12.20 
  -1   3   0  199.74   12.19 
   1   3   0  204.62   12.20 
  -1   3   0  207.23   12.22 
   1   3   0  208.27   12.17 
  -1   3   0  203.91   12.15 
   1   3   0  213.03   12.20 
  -1   3   0  200.51   12.16 
   1   3   0  202.58   12.17 
   1   3   0  197.72   12.13 
  -1   3   0  206.51   12.15 
   2  -3   0   21.43    1.48 
  -2  -3   0   21.23    1.38 
   2  -3   0   19.92    1.59 
   2  -3   0   22.93    1.49 
   2  -3   0   21.76    1.48 
  -2  -3   0   20.83    1.37 
  -2  -3   0   22.36    1.44 
  -2  -3   0   21.45    1.43 
   2  -3   0   22.98    1.47 
  -2  -3   0   21.04    1.45 
  -2   3   0   21.63    1.48 
   2   3   0   24.01    1.45 
  -2   3   0   21.94    1.41 
  -2   3   0   20.19    1.63 
  -2   3   0   23.57    1.47 
   2   3   0   21.73    1.43 
   2   3   0   22.94    1.46 
  -2   3   0   21.95    1.41 
  -2   3   0   23.40    1.55 
   2   3   0   19.31    1.63 
  -2   3   0   20.07    1.37 
   2   3   0   21.96    1.57 
  -3  -3   0   27.00    2.06 
   3  -3   0   27.41    1.99 
   3  -3   0   30.01    2.27 
  -3  -3   0   30.73    2.01 
  -3  -3   0   29.72    1.89 
  -3  -3   0   28.64    2.00 
   3   3   0   32.57    1.99 
  -3   3   0   30.23    2.04 
  -3   3   0   29.72    1.90 
   3   3   0   35.17    2.33 
  -3   3   0   30.70    2.04 
   3   3   0   31.63    2.26 
   4  -3   0    2.84    1.17 
   4  -3   0    1.27    0.62 
  -4  -3   0    1.42    0.53 
  -4   3   0    2.13    0.55 
   4   3   0    1.87    1.15 
   4   3   0    2.91    0.69 
   5  -3   0   63.00    3.82 
   5  -3   0   56.07    4.12 
   5  -3   0   60.76    4.00 
  -5  -3   0   64.35    4.01 
   5   3   0   65.17    4.04 
  -5   3   0   62.09    4.02 
   5   3   0   64.02    4.21 
   5   3   0   67.21    3.83 
   5   3   0   65.06    3.83 
   6  -3   0   16.49    1.07 
   6  -3   0   15.66    1.46 
   6  -3   0   16.62    1.69 
   6  -3   0   13.41    1.68 
   6   3   0   16.73    1.87 
   6   3   0   18.65    1.83 
   6   3   0   16.56    1.08 
   6   3   0   15.74    1.57 
   0  -4   0  349.42   21.27 
   0  -4   0  376.22   21.26 
   0  -4   0  368.60   21.27 
   0  -4   0  340.47   21.28 
   0  -4   0  341.99   21.30 
   0  -4   0  363.83   21.33 
   0  -4   0  339.51   21.31 
   0  -4   0  377.39   21.26 
   0  -4   0  358.21   21.30 
   0  -4   0  336.49   21.30 
   0  -4   0  366.85   21.27 
   0  -4   0  334.63   21.25 
   0  -4   0  389.82   21.27 
   0  -4   0  334.40   21.27 
   0   4   0  364.74   21.27 
   0   4   0  318.25   21.27 
   0   4   0  355.04   21.28 
   0   4   0  379.28   21.26 
   0   4   0  359.89   21.27 
   0   4   0  348.10   21.27 
   0   4   0  371.47   21.27 
   0   4   0  319.05   21.28 
   0   4   0  337.41   21.28 
   0   4   0  350.38   21.26 
   0   4   0  359.49   21.30 
   0   4   0  380.64   21.26 
  -1  -4   0  134.37    8.25 
   1  -4   0  133.56    8.17 
  -1  -4   0  137.34    8.23 
   1  -4   0  143.05    8.24 
   1  -4   0  133.81    8.19 
   1  -4   0  136.76    8.18 
   1  -4   0  133.06    8.19 
   1  -4   0  135.63    8.18 
   1  -4   0  132.44    8.18 
   1  -4   0  132.90    8.25 
   1  -4   0  137.32    8.18 
   1  -4   0  136.44    8.27 
  -1  -4   0  135.70    8.19 
   1  -4   0  134.38    8.18 
   1  -4   0  134.70    8.19 
  -1  -4   0  134.14    8.18 
  -1  -4   0  142.22    8.18 
   1  -4   0  137.05    8.19 
  -1  -4   0  131.24    8.22 
   1  -4   0  136.88    8.30 
   1  -4   0  127.48    8.30 
   1  -4   0  136.75    8.23 
  -1  -4   0  135.51    8.18 
  -1  -4   0  137.87    8.18 
  -1   4   0  132.94    8.22 
  -1   4   0  139.37    8.37 
  -1   4   0  135.22    8.20 
  -1   4   0  132.62    8.25 
   1   4   0  142.00    8.22 
   1   4   0  137.39    8.24 
  -1   4   0  138.97    8.19 
  -1   4   0  143.87    8.25 
  -1   4   0  132.32    8.21 
   1   4   0  138.18    8.27 
   1   4   0  136.50    8.25 
  -1   4   0  136.94    8.19 
   1   4   0  134.28    8.22 
   1   4   0  136.63    8.16 
  -1   4   0  137.06    8.20 
   1   4   0  141.49    8.17 
   1   4   0  132.54    8.17 
   1   4   0  135.00    8.22 
   1   4   0  131.42    8.25 
  -1   4   0  137.59    8.18 
  -2  -4   0   16.65    1.14 
   2  -4   0   17.43    1.16 
  -2  -4   0   15.96    1.03 
  -2  -4   0   15.15    1.16 
   2  -4   0   17.13    1.20 
  -2  -4   0   16.52    1.15 
  -2  -4   0   16.54    1.07 
   2  -4   0   15.87    1.22 
  -2  -4   0   15.34    1.05 
   2  -4   0   14.95    1.26 
   2   4   0   16.48    1.14 
  -2   4   0   16.31    1.26 
   2   4   0   15.30    1.35 
  -2   4   0   14.21    1.36 
   2   4   0   15.65    1.15 
   2   4   0   14.83    1.11 
  -2   4   0   16.30    1.05 
   2   4   0   15.43    1.26 
  -2   4   0   15.60    1.09 
  -2   4   0   15.48    1.17 
  -2   4   0   15.83    1.18 
   3  -4   0  251.35   15.20 
  -3  -4   0  244.63   15.07 
   3  -4   0  245.40   15.06 
  -3  -4   0  254.26   15.08 
  -3  -4   0  245.76   15.09 
  -3  -4   0  244.04   14.98 
   3  -4   0  240.40   15.04 
   3   4   0  244.32   15.05 
   3   4   0  256.58   15.23 
  -3   4   0  266.38   15.00 
  -3   4   0  247.99   15.11 
   3   4   0  245.02   15.21 
  -3   4   0  251.38   15.10 
  -4  -4   0   22.46    1.50 
   4  -4   0   23.32    1.98 
   4  -4   0   20.14    1.68 
  -4  -4   0   20.09    1.64 
   4   4   0   22.90    1.81 
   4   4   0   20.95    1.60 
  -4   4   0   23.17    1.50 
   4   4   0   20.54    1.97 
   5  -4   0   74.94    4.44 
   5  -4   0   73.03    4.60 
   5  -4   0   73.51    4.73 
  -5  -4   0   76.57    4.64 
   5   4   0   75.05    4.43 
   5   4   0   74.87    4.58 
   5   4   0   66.61    4.89 
   5   4   0   74.44    4.43 
  -5   4   0   70.07    4.62 
   6  -4   0    1.67    1.05 
   6  -4   0    1.78    0.99 
   6  -4   0    2.72    1.16 
   6  -4   0    1.18    0.32 
   6   4   0    0.17    0.24 
   6   4   0    0.40    0.88 
   6   4   0    1.17    1.24 
   0  -5   0    0.01    0.23 
   0  -5   0    0.06    0.20 
   0  -5   0   -0.11    0.26 
   0  -5   0    0.35    0.25 
   0  -5   0    0.04    0.34 
   0  -5   0   -0.13    0.31 
   0  -5   0    0.10    0.26 
   0  -5   0    0.26    0.30 
   0  -5   0    0.34    0.30 
   0  -5   0    0.22    0.25 
   0  -5   0    0.43    0.31 
   0  -5   0    0.21    0.23 
   0  -5   0    0.15    0.34 
   0  -5   0    0.75    0.40 
   0  -5   0   -0.08    0.18 
   0   5   0   -0.18    0.32 
   0   5   0    0.03    0.31 
   0   5   0    0.04    0.19 
   0   5   0   -0.08    0.30 
   0   5   0   -0.17    0.39 
   0   5   0    0.27    0.34 
   0   5   0    0.11    0.30 
   0   5   0    0.09    0.21 
   0   5   0    0.27    0.24 
   0   5   0   -0.14    0.24 
   0   5   0   -0.23    0.34 
   0   5   0    0.13    0.25 
   0   5   0    0.17    0.23 
   1  -5   0   45.16    2.85 
   1  -5   0   43.66    2.96 
   1  -5   0   46.36    2.78 
   1  -5   0   43.02    2.75 
  -1  -5   0   44.44    2.77 
   1  -5   0   47.01    2.79 
   1  -5   0   47.37    2.78 
   1  -5   0   45.44    2.77 
   1  -5   0   45.46    2.77 
   1  -5   0   47.02    2.86 
  -1  -5   0   45.61    2.89 
   1  -5   0   47.29    2.90 
  -1  -5   0   46.94    2.79 
   1  -5   0   45.98    2.80 
   1  -5   0   44.04    2.78 
  -1  -5   0   47.13    2.78 
   1  -5   0   39.81    2.75 
  -1  -5   0   46.64    2.85 
   1  -5   0   45.59    2.79 
  -1  -5   0   44.98    2.77 
   1  -5   0   44.61    2.85 
   1  -5   0   44.51    2.88 
   1  -5   0   44.29    2.80 
  -1  -5   0   46.21    2.79 
  -1  -5   0   46.41    2.85 
   1   5   0   43.15    2.78 
   1   5   0   42.81    2.75 
   1   5   0   44.80    2.76 
  -1   5   0   47.20    2.78 
  -1   5   0   43.99    2.83 
  -1   5   0   45.68    2.87 
   1   5   0   44.86    2.76 
   1   5   0   44.15    2.75 
   1   5   0   44.87    2.74 
  -1   5   0   44.13    2.98 
   1   5   0   45.50    2.77 
   1   5   0   43.45    2.76 
  -1   5   0   45.70    2.84 
   1   5   0   44.31    2.76 
  -1   5   0   46.57    2.78 
  -1   5   0   45.62    2.81 
  -1   5   0   44.85    2.89 
   1   5   0   48.91    2.90 
  -1   5   0   48.49    2.80 
   1   5   0   48.43    2.88 
   1   5   0   41.11    2.89 
   1   5   0   46.17    2.84 
   1   5   0   44.24    2.84 
  -1   5   0   47.27    2.79 
   1   5   0   43.66    2.74 
   1   5   0   45.81    2.83 
  -2  -5   0   30.05    1.94 
  -2  -5   0   31.43    1.98 
   2  -5   0   28.78    2.02 
   2  -5   0   30.68    2.02 
  -2  -5   0   28.25    1.86 
  -2  -5   0   29.73    1.87 
   2  -5   0   32.89    1.97 
   2  -5   0   29.63    2.05 
  -2  -5   0   30.03    1.98 
  -2   5   0   29.00    1.96 
  -2   5   0   29.01    1.87 
   2   5   0   29.08    1.93 
   2   5   0   29.80    1.95 
   2   5   0   28.69    2.15 
  -2   5   0   31.09    2.00 
   2   5   0   28.56    2.08 
  -2   5   0   28.51    2.14 
  -2   5   0   29.56    2.17 
  -2   5   0   29.87    1.90 
   2   5   0   27.48    1.92 
   2   5   0   30.39    1.96 
   2   5   0   29.40    2.04 
  -3  -5   0   53.77    3.31 
   3  -5   0   47.77    3.40 
   3  -5   0   54.56    3.41 
  -3  -5   0   54.29    3.42 
  -3  -5   0   52.17    3.40 
   3  -5   0   54.91    3.58 
  -3  -5   0   55.01    3.45 
   3   5   0   53.52    3.59 
  -3   5   0   55.98    3.31 
   3   5   0   50.37    3.59 
  -3   5   0   55.81    3.44 
   3   5   0   49.46    3.38 
  -3   5   0   54.37    3.45 
   3   5   0   55.73    3.55 
  -4  -5   0   10.21    1.23 
   4  -5   0   11.38    1.29 
   4  -5   0   12.77    1.20 
  -4  -5   0   10.99    0.99 
   4   5   0   12.20    1.16 
   4   5   0   11.99    1.23 
  -4   5   0   12.42    0.97 
   4   5   0   14.16    1.58 
   5  -5   0   28.78    1.76 
   5  -5   0   32.61    2.26 
  -5  -5   0   28.02    2.02 
   5  -5   0   31.90    2.03 
   5  -5   0   24.25    2.32 
   5   5   0   27.53    1.99 
   5   5   0   26.56    1.74 
  -5   5   0   28.65    2.01 
   5   5   0   27.99    1.76 
   6  -5   0    0.47    1.03 
   6  -5   0    0.37    0.25 
   6  -5   0    0.15    0.75 
   6  -5   0    0.15    0.98 
   6   5   0    0.88    1.11 
   6   5   0    0.64    0.91 
   6   5   0    0.49    0.22 
   7  -5   0    2.09    0.87 
   0  -6   0   14.15    1.07 
   0  -6   0   13.84    0.99 
   0  -6   0   13.28    1.30 
   0  -6   0   12.23    1.01 
   0  -6   0   14.09    1.16 
   0  -6   0   13.61    1.10 
   0  -6   0   14.23    1.00 
   0  -6   0   12.99    1.37 
   0  -6   0   12.61    1.12 
   0  -6   0   14.35    0.96 
   0  -6   0   15.49    0.98 
   0  -6   0   13.94    1.01 
   0  -6   0   14.41    1.04 
   0  -6   0   13.91    1.14 
   0  -6   0   14.37    1.01 
   0  -6   0   13.57    1.06 
   0  -6   0   14.66    0.98 
   0   6   0   15.99    0.98 
   0   6   0   14.53    0.97 
   0   6   0   14.45    1.04 
   0   6   0   15.01    1.08 
   0   6   0   15.38    1.00 
   0   6   0   15.83    0.99 
   0   6   0   14.37    1.05 
   0   6   0   14.55    0.98 
   0   6   0   14.85    1.12 
   0   6   0   14.39    1.15 
   0   6   0   13.67    1.07 
   0   6   0   13.97    1.05 
   0   6   0   14.49    1.10 
  -1  -6   0    7.98    0.77 
  -1  -6   0    7.85    0.59 
  -1  -6   0    7.80    0.86 
   1  -6   0    7.90    0.63 
   1  -6   0    8.67    0.76 
   1  -6   0    8.28    0.89 
   1  -6   0    7.95    0.70 
   1  -6   0    7.95    0.70 
  -1  -6   0    7.38    0.67 
   1  -6   0    7.79    0.65 
  -1  -6   0    7.74    0.64 
   1  -6   0    8.54    0.70 
   1  -6   0    7.98    0.76 
   1  -6   0    7.34    0.76 
  -1  -6   0    7.68    0.66 
   1  -6   0    8.28    0.84 
  -1  -6   0    7.79    0.60 
   1  -6   0    6.79    0.67 
   1  -6   0    7.72    0.62 
   1  -6   0    7.71    0.61 
  -1  -6   0    6.98    0.79 
   1  -6   0    6.90    1.00 
   1  -6   0    7.97    0.68 
   1  -6   0    7.91    0.61 
   1   6   0    7.20    0.61 
   1   6   0    6.89    0.77 
  -1   6   0    7.23    0.63 
  -1   6   0    7.24    0.80 
  -1   6   0    8.05    0.63 
   1   6   0    6.88    0.56 
   1   6   0    7.02    0.56 
   1   6   0    8.11    0.63 
   1   6   0    6.77    0.60 
  -1   6   0    6.98    1.02 
   1   6   0    7.63    0.67 
   1   6   0    7.53    0.71 
   1   6   0    7.93    0.60 
   1   6   0    6.31    0.86 
  -1   6   0    7.82    0.82 
   1   6   0    7.71    0.62 
   1   6   0    7.62    0.82 
   1   6   0    8.53    0.75 
   1   6   0    8.27    0.85 
   1   6   0    7.98    0.61 
  -1   6   0    6.60    0.69 
  -1   6   0    8.12    0.67 
  -1   6   0    7.56    0.77 
  -1   6   0    6.85    1.03 
  -1   6   0    7.82    0.88 
  -2  -6   0    2.48    0.48 
   2  -6   0    2.06    0.63 
   2  -6   0    2.61    0.58 
   2  -6   0    2.89    0.67 
  -2  -6   0    2.14    0.65 
  -2  -6   0    2.49    0.45 
  -2  -6   0    2.45    0.64 
   2  -6   0    2.41    0.76 
  -2  -6   0    2.22    0.58 
   2   6   0    3.61    0.91 
   2   6   0    2.00    0.56 
  -2   6   0    2.76    0.88 
   2   6   0    2.24    0.81 
   2   6   0    2.84    0.76 
  -2   6   0    2.26    0.61 
   2   6   0    2.36    0.61 
  -2   6   0    2.06    0.45 
  -2   6   0    2.04    0.49 
   2   6   0    1.90    0.58 
   2   6   0    2.46    0.48 
  -2   6   0    2.28    0.60 
  -3  -6   0   12.96    0.96 
  -3  -6   0   12.64    1.10 
   3  -6   0   11.13    1.06 
   3  -6   0   12.76    1.15 
  -3  -6   0   13.81    1.14 
  -3  -6   0   11.37    1.06 
   3  -6   0   12.64    1.06 
   3   6   0   12.88    1.26 
  -3   6   0   13.06    0.94 
   3   6   0   11.29    1.42 
   3   6   0   10.07    1.03 
   3   6   0   12.49    1.34 
  -3   6   0   12.62    1.10 
  -3   6   0   12.04    1.14 
   4  -6   0   26.52    2.20 
   4  -6   0   29.76    2.14 
  -4  -6   0   31.87    2.04 
   4   6   0   28.99    2.15 
   4   6   0   28.32    2.17 
   4   6   0   31.34    2.48 
  -4   6   0   32.52    2.04 
   5  -6   0   11.36    1.38 
   5  -6   0   16.65    1.54 
   5  -6   0   12.89    0.87 
   5  -6   0   13.75    1.27 
   5   6   0   12.95    1.24 
   5   6   0   12.11    0.87 
   5   6   0   11.45    0.83 
   6  -6   0   14.17    0.98 
   6  -6   0   17.88    1.90 
   6  -6   0   13.86    1.54 
   6   6   0   13.28    0.94 
   6   6   0   13.48    1.47 
   6   6   0   15.25    1.80 
   7  -6   0    1.16    0.60 
   0  -7   0    0.92    0.37 
   0  -7   0    0.79    0.46 
   0  -7   0    0.54    0.45 
   0  -7   0    0.75    0.43 
   0  -7   0    0.85    0.45 
   0  -7   0    0.25    0.46 
   0  -7   0    0.82    0.55 
   0  -7   0    0.34    0.75 
   0  -7   0    1.58    0.54 
   0  -7   0    0.66    0.42 
   0  -7   0    0.45    0.29 
   0  -7   0    0.35    0.58 
   0  -7   0    0.33    0.33 
   0  -7   0    0.53    0.41 
   0  -7   0    0.49    0.34 
   0  -7   0    0.79    0.32 
   0  -7   0    0.37    0.33 
   0  -7   0    0.33    0.45 
   0   7   0    0.81    0.59 
   0   7   0    0.65    0.41 
   0   7   0    0.09    0.30 
   0   7   0    0.36    0.43 
   0   7   0    1.00    0.33 
   0   7   0    0.48    0.36 
   0   7   0    0.41    0.28 
   0   7   0    1.98    0.57 
   0   7   0    0.59    0.46 
   0   7   0    0.52    0.31 
   0   7   0    0.60    0.59 
   0   7   0    0.37    0.46 
   0   7   0    0.58    0.48 
   0   7   0    0.17    0.36 
  -1  -7   0   70.65    4.38 
   1  -7   0   71.39    4.37 
   1  -7   0   70.13    4.30 
   1  -7   0   67.80    4.49 
   1  -7   0   72.42    4.30 
  -1  -7   0   70.08    4.37 
   1  -7   0   68.44    4.55 
  -1  -7   0   72.17    4.41 
   1  -7   0   65.86    4.29 
   1  -7   0   66.83    4.30 
   1  -7   0   72.17    4.57 
   1  -7   0   68.26    4.27 
  -1  -7   0   72.17    4.31 
   1  -7   0   67.65    4.45 
   1  -7   0   73.18    4.43 
   1  -7   0   72.08    4.28 
   1  -7   0   74.53    4.30 
  -1  -7   0   72.46    4.30 
  -1   7   0   69.52    4.30 
   1   7   0   65.55    4.38 
   1   7   0   65.97    4.33 
   1   7   0   70.07    4.36 
  -1   7   0   69.26    4.28 
   1   7   0   71.17    4.42 
   1   7   0   68.26    4.27 
   1   7   0   70.54    4.28 
   1   7   0   74.21    4.29 
   1   7   0   66.85    4.27 
   1   7   0   73.22    4.40 
   1   7   0   69.13    4.25 
  -1   7   0   71.44    4.42 
  -1   7   0   67.78    4.36 
  -1   7   0   70.09    4.38 
  -1   7   0   68.52    4.49 
   1   7   0   74.30    4.27 
   1   7   0   69.52    4.36 
   1   7   0   66.54    4.27 
   1   7   0   65.86    4.26 
  -1   7   0   75.80    4.29 
  -2  -7   0    1.56    0.50 
  -2  -7   0    2.85    0.52 
   2  -7   0    2.07    0.82 
   2  -7   0    1.30    0.50 
  -2  -7   0    1.92    0.48 
   2  -7   0    1.72    0.53 
  -2  -7   0    1.70    0.62 
  -2  -7   0    1.72    0.66 
   2   7   0    1.90    0.59 
   2   7   0    1.53    0.63 
   2   7   0    2.45    0.69 
   2   7   0    2.15    0.84 
   2   7   0    2.51    0.82 
  -2   7   0    1.52    0.60 
  -2   7   0    2.07    0.52 
   2   7   0    1.15    0.50 
  -2   7   0    0.63    0.46 
  -2   7   0    1.79    0.84 
  -2   7   0    1.90    0.46 
   3  -7   0   18.81    1.42 
  -3  -7   0   16.62    1.40 
  -3  -7   0   17.82    1.44 
   3  -7   0   17.79    1.33 
  -3  -7   0   17.33    1.37 
  -3  -7   0   16.87    1.25 
   3  -7   0   17.27    1.37 
   3  -7   0   14.95    1.35 
   3  -7   0   15.64    1.38 
  -3   7   0   17.39    1.41 
   3   7   0   19.57    1.15 
  -3   7   0   17.17    1.43 
   3   7   0   15.48    1.33 
   3   7   0   17.28    1.58 
  -3   7   0   17.47    1.23 
   3   7   0   15.71    1.51 
   3   7   0   17.45    1.68 
  -3   7   0   16.31    1.55 
   4  -7   0    4.12    0.97 
  -4  -7   0    5.96    0.76 
   4  -7   0    4.53    1.06 
  -4   7   0    5.70    0.69 
   4   7   0    4.14    0.98 
   4   7   0    3.45    0.96 
   4   7   0    4.90    1.30 
   5  -7   0   17.51    1.72 
   5  -7   0   20.78    1.21 
   5  -7   0   16.98    1.48 
   5  -7   0   12.49    1.78 
   5   7   0   15.79    1.09 
   5   7   0   17.39    1.49 
   5   7   0   16.50    1.14 
   5   7   0   17.58    1.66 
   6  -7   0    0.27    0.80 
   6  -7   0    0.61    0.29 
   6  -7   0    0.14    0.93 
   6   7   0    0.27    0.24 
   6   7   0    0.16    0.83 
   6   7   0    0.75    1.28 
   7  -7   0    2.45    0.81 
   0  -8   0   85.94    5.31 
   0  -8   0   85.78    5.43 
   0  -8   0   91.42    5.62 
   0  -8   0   86.36    5.44 
   0  -8   0   81.05    5.34 
   0  -8   0   87.25    5.32 
   0  -8   0   89.98    5.35 
   0  -8   0   91.46    5.33 
   0  -8   0   87.80    5.48 
   0  -8   0   88.43    5.31 
   0  -8   0   84.35    5.56 
   0  -8   0   88.04    5.36 
   0   8   0   91.19    5.36 
   0   8   0   89.56    5.32 
   0   8   0   87.73    5.33 
   0   8   0   86.95    5.48 
   0   8   0   85.58    5.36 
   0   8   0   78.89    5.37 
   0   8   0   86.86    5.41 
   0   8   0   81.45    5.31 
   0   8   0   86.61    5.38 
   0   8   0   88.45    5.37 
   0   8   0   87.43    5.46 
   0   8   0   87.65    5.31 
   0   8   0   87.40    5.44 
   0   8   0   94.20    5.38 
   0   8   0   90.39    5.44 
   1  -8   0   78.33    4.66 
   1  -8   0   79.81    4.66 
   1  -8   0   72.99    4.94 
   1  -8   0   79.69    4.64 
  -1  -8   0   74.53    4.65 
   1  -8   0   78.27    4.65 
   1  -8   0   72.51    4.64 
   1  -8   0   72.85    4.62 
   1  -8   0   74.43    4.87 
  -1  -8   0   73.54    4.73 
   1  -8   0   73.61    4.73 
   1  -8   0   74.84    4.79 
  -1  -8   0   73.79    4.76 
   1   8   0   73.52    4.73 
   1   8   0   77.40    4.64 
  -1   8   0   78.16    4.78 
  -1   8   0   75.81    4.63 
   1   8   0   73.96    4.71 
   1   8   0   73.64    4.63 
   1   8   0   83.04    4.63 
   1   8   0   75.08    4.62 
  -1   8   0   75.15    4.62 
   1   8   0   77.16    4.76 
  -1   8   0   75.67    4.70 
  -1   8   0   72.51    4.85 
   1   8   0   76.67    4.72 
   1   8   0   78.81    4.79 
   1   8   0   72.11    4.60 
   1   8   0   79.65    4.65 
   1   8   0   70.82    4.68 
  -1   8   0   75.42    4.65 
   2  -8   0  131.03    8.21 
  -2  -8   0  128.90    8.17 
  -2  -8   0  135.19    8.21 
   2  -8   0  138.49    8.28 
  -2  -8   0  134.27    8.26 
  -2  -8   0  129.14    8.11 
  -2  -8   0  138.83    8.12 
  -2  -8   0  138.93    8.23 
   2  -8   0  135.53    8.31 
   2   8   0  133.35    8.23 
  -2   8   0  134.11    8.38 
   2   8   0  143.70    8.27 
  -2   8   0  136.92    8.26 
  -2   8   0  124.76    8.17 
   2   8   0  132.20    8.29 
  -2   8   0  127.67    8.13 
   2   8   0  127.42    8.23 
   2   8   0  134.89    8.22 
  -2   8   0  126.88    8.09 
   2   8   0  133.32    8.24 
  -2   8   0  139.19    8.20 
  -3  -8   0    5.91    0.87 
   3  -8   0    6.06    0.83 
   3  -8   0    5.98    0.86 
   3  -8   0    6.37    0.70 
  -3  -8   0    6.85    0.95 
   3  -8   0    5.11    0.82 
   3  -8   0    5.62    0.82 
  -3  -8   0    6.06    0.76 
  -3  -8   0    5.87    0.92 
   3  -8   0    5.52    0.89 
  -3   8   0    7.09    0.92 
  -3   8   0    7.60    0.69 
   3   8   0    5.90    0.59 
  -3   8   0    6.48    0.86 
  -3   8   0    6.34    0.90 
   3   8   0    6.11    1.30 
   3   8   0    6.51    1.06 
   3   8   0    5.85    0.72 
   3   8   0    5.43    0.81 
   3   8   0    6.34    0.73 
   3   8   0    6.81    1.09 
   4  -8   0   12.03    1.31 
   4  -8   0   10.55    1.18 
  -4  -8   0   11.78    1.06 
  -4   8   0   11.44    0.97 
   4   8   0    9.19    1.52 
   4   8   0    9.46    1.22 
   4   8   0   11.41    1.22 
   5  -8   0    5.30    1.32 
   5  -8   0    5.08    1.07 
   5  -8   0    5.36    1.57 
   5   8   0    4.28    0.46 
   5   8   0    5.01    0.91 
   5   8   0    3.98    1.30 
   6  -8   0    1.32    0.37 
   6  -8   0    0.75    0.92 
   6  -8   0    1.12    0.29 
   6  -8   0    1.25    0.77 
   6   8   0    2.22    1.33 
   6   8   0    1.84    0.90 
   6   8   0    1.24    0.33 
   0  -9   0   -0.07    0.53 
   0  -9   0   -0.16    0.32 
   0  -9   0    0.28    0.48 
   0  -9   0    0.21    0.77 
   0  -9   0   -0.25    0.54 
   0  -9   0    0.12    0.42 
   0  -9   0   -0.02    0.28 
   0  -9   0    0.14    0.36 
   0  -9   0    0.01    0.48 
   0  -9   0    0.16    0.34 
   0   9   0   -0.10    0.30 
   0   9   0    0.27    0.59 
   0   9   0    0.23    0.59 
   0   9   0    0.09    0.36 
   0   9   0   -0.44    0.43 
   0   9   0   -0.20    0.68 
   0   9   0    0.00    0.29 
   0   9   0    0.19    0.52 
   0   9   0    0.15    0.50 
   0   9   0    0.80    0.50 
   0   9   0    0.65    0.47 
   0   9   0    0.85    0.40 
   0   9   0    0.13    0.30 
   1  -9   0    3.75    1.22 
   1  -9   0    3.26    0.60 
   1  -9   0    4.31    0.61 
  -1  -9   0    4.14    0.73 
   1  -9   0    4.63    0.56 
   1  -9   0    4.51    0.65 
   1  -9   0    3.50    1.02 
   1  -9   0    3.98    0.62 
   1  -9   0    4.20    0.61 
  -1  -9   0    3.94    0.59 
   1  -9   0    4.54    0.81 
   1   9   0    3.94    0.48 
   1   9   0    4.07    0.84 
   1   9   0    3.44    0.64 
  -1   9   0    3.59    0.94 
   1   9   0    3.79    0.64 
  -1   9   0    3.52    0.84 
   1   9   0    3.64    0.71 
   1   9   0    2.67    0.71 
   1   9   0    3.24    0.87 
   1   9   0    4.64    0.78 
   1   9   0    3.55    0.77 
   1   9   0    4.24    0.60 
  -1   9   0    3.43    0.72 
   1   9   0    3.76    0.61 
   2  -9   0  128.20    8.25 
   2  -9   0  128.41    8.07 
  -2  -9   0  135.88    8.25 
  -2  -9   0  140.91    8.16 
   2  -9   0  138.96    8.36 
   2  -9   0  136.17    8.32 
  -2  -9   0  129.23    8.18 
   2  -9   0  141.97    8.12 
  -2  -9   0  141.55    8.26 
   2  -9   0  127.26    8.18 
  -2  -9   0  130.40    8.40 
  -2   9   0  132.01    8.42 
   2   9   0  135.30    8.23 
   2   9   0  137.23    8.34 
  -2   9   0  131.39    8.29 
   2   9   0  134.28    8.23 
  -2   9   0  131.32    8.12 
  -2   9   0  130.19    8.21 
   2   9   0  134.62    8.30 
   2   9   0  127.98    8.26 
  -2   9   0  134.01    8.23 
   2   9   0  139.33    8.30 
   2   9   0  128.57    8.28 
   3  -9   0   23.52    1.84 
   3  -9   0   23.46    1.80 
   3  -9   0   25.59    1.84 
  -3  -9   0   26.26    1.75 
   3  -9   0   24.74    1.67 
   3  -9   0   23.49    1.76 
   3   9   0   25.78    2.17 
   3   9   0   19.91    1.84 
  -3   9   0   26.21    1.92 
   3   9   0   27.43    2.01 
  -3   9   0   24.94    1.81 
   3   9   0   23.27    1.68 
   3   9   0   23.03    1.97 
  -3   9   0   25.68    1.69 
   3   9   0   25.08    1.61 
  -4  -9   0    9.63    0.97 
   4  -9   0    7.43    0.79 
   4  -9   0    7.70    1.08 
   4  -9   0    9.77    1.30 
   4   9   0    7.16    1.13 
   4   9   0    8.46    1.10 
  -4   9   0    7.97    0.89 
   4   9   0    8.14    1.60 
   5  -9   0   14.14    1.13 
   5  -9   0   13.61    1.07 
   5  -9   0   13.42    1.56 
   5  -9   0   12.58    1.35 
   5  -9   0   14.46    1.56 
   5  -9   0   12.91    1.13 
   5  -9   0   14.51    1.81 
   5   9   0   13.23    1.04 
   5   9   0   13.08    1.24 
   5   9   0   14.71    1.27 
   5   9   0   14.28    1.63 
   5   9   0   15.26    1.39 
   5   9   0   12.60    0.91 
   5   9   0   13.06    1.48 
   6  -9   0    0.64    0.69 
   6  -9   0    1.09    0.93 
   6  -9   0    1.75    0.49 
   6  -9   0    1.73    0.53 
   6   9   0    1.66    0.34 
   6   9   0    1.12    1.26 
   6   9   0    2.21    0.91 
   0 -10   0   28.81    2.23 
   0 -10   0   25.88    2.22 
   0 -10   0   26.33    1.80 
   0 -10   0   24.74    2.10 
   0 -10   0   26.23    1.76 
   0 -10   0   24.18    1.75 
   0 -10   0   25.10    1.93 
   0 -10   0   26.23    1.96 
   0  10   0   28.38    2.02 
   0  10   0   28.04    1.87 
   0  10   0   28.96    1.85 
   0  10   0   26.40    1.83 
   0  10   0   28.47    1.87 
   0  10   0   28.29    1.98 
   0  10   0   25.66    1.87 
   0  10   0   28.38    1.92 
   0  10   0   25.12    1.75 
   0  10   0   27.31    1.94 
  -1 -10   0   67.39    4.61 
   1 -10   0   74.99    4.55 
   1 -10   0   72.08    4.82 
  -1 -10   0   69.10    4.70 
  -1 -10   0   76.87    4.67 
   1 -10   0   67.02    4.53 
   1 -10   0   74.20    4.53 
   1 -10   0   76.22    4.73 
   1 -10   0   72.24    4.54 
  -1 -10   0   73.98    4.67 
   1 -10   0   73.66    4.54 
   1  10   0   73.81    4.52 
   1  10   0   70.60    4.67 
   1  10   0   72.01    4.44 
   1  10   0   76.68    4.53 
  -1  10   0   63.56    4.67 
  -1  10   0   74.67    4.70 
   1  10   0   80.62    4.52 
  -1  10   0   74.60    4.62 
  -1  10   0   74.17    4.78 
   1  10   0   73.97    4.52 
   1  10   0   74.98    4.72 
   1  10   0   74.35    4.63 
   2 -10   0   11.29    0.83 
   2 -10   0   10.16    1.10 
  -2 -10   0   11.50    1.05 
  -2 -10   0   10.80    1.19 
  -2 -10   0   10.81    1.08 
   2 -10   0   10.80    1.15 
   2 -10   0   11.91    1.33 
   2 -10   0   12.63    1.22 
  -2  10   0   12.65    1.12 
  -2  10   0   10.36    0.96 
  -2  10   0   11.97    1.41 
   2  10   0   10.32    1.18 
   2  10   0   12.72    1.16 
   2  10   0    8.68    1.08 
   2  10   0   12.41    1.24 
  -2  10   0   11.75    1.19 
   2  10   0   11.85    1.28 
   2  10   0    9.92    1.13 
   2  10   0   11.03    1.38 
  -2  10   0   11.15    1.15 
   3 -10   0    5.71    0.92 
   3 -10   0    5.46    0.87 
  -3 -10   0    5.57    0.82 
   3 -10   0    5.93    0.93 
   3 -10   0    5.75    0.77 
   3  10   0    6.41    1.22 
  -3  10   0    6.31    0.72 
   3  10   0    5.17    0.86 
   3  10   0    5.95    1.01 
   3  10   0    5.85    0.66 
  -3  10   0    7.45    0.99 
   3  10   0    5.62    1.10 
   3  10   0    5.05    1.40 
   3  10   0    3.64    0.79 
  -3  10   0    5.86    1.25 
  -3  10   0    5.63    0.91 
   4 -10   0    2.75    0.48 
   4 -10   0    1.72    0.72 
   4 -10   0    2.71    0.65 
  -4 -10   0    2.63    0.80 
   4 -10   0    2.39    0.85 
   4  10   0    3.48    0.98 
  -4  10   0    2.10    0.74 
   4  10   0    3.44    1.01 
   4  10   0    2.83    1.40 
   5 -10   0    4.42    0.79 
   5 -10   0    4.58    1.08 
   5 -10   0    5.05    0.73 
   5 -10   0    3.25    1.48 
   5 -10   0    4.14    0.68 
   5 -10   0    4.61    1.20 
   5 -10   0    4.98    0.97 
   5  10   0    5.73    0.99 
   5  10   0    5.14    1.07 
   5  10   0    5.18    0.61 
   5  10   0    4.62    0.62 
   5  10   0    4.86    0.48 
   5  10   0    5.57    1.08 
   5  10   0    4.28    1.40 
   6 -10   0    0.85    0.21 
   6 -10   0    0.62    0.90 
   6 -10   0    1.05    0.36 
   6 -10   0    1.15    0.30 
   6 -10   0    0.51    0.70 
   6  10   0    1.13    0.83 
   6  10   0    1.19    0.34 
   0 -11   0   -0.21    0.85 
   0 -11   0    0.07    0.67 
   0 -11   0   -0.22    0.47 
   0 -11   0    0.56    0.37 
   0 -11   0   -0.29    0.46 
   0  11   0    0.18    0.50 
   0  11   0   -0.17    0.52 
   0  11   0    0.26    0.47 
   0  11   0   -0.48    0.66 
   0  11   0    0.16    0.76 
   0  11   0   -0.13    0.66 
   0  11   0   -0.12    0.29 
   0  11   0    0.01    0.52 
   0  11   0    0.05    0.66 
   0  11   0    0.16    0.61 
  -1 -11   0   19.06    1.58 
   1 -11   0   17.23    1.35 
   1 -11   0   17.70    1.56 
  -1 -11   0   17.50    1.57 
   1 -11   0   17.54    1.36 
   1 -11   0   18.90    1.75 
   1 -11   0   18.06    1.37 
   1 -11   0   18.91    1.38 
  -1 -11   0   13.95    1.64 
   1 -11   0   18.30    1.38 
  -1  11   0   18.60    1.70 
   1  11   0   18.39    1.34 
   1  11   0   18.72    1.50 
  -1  11   0   16.87    1.48 
   1  11   0   18.04    1.59 
   1  11   0   18.04    1.36 
   1  11   0   19.05    1.36 
  -1  11   0   18.32    1.48 
   1  11   0   19.60    1.34 
   1  11   0   18.98    1.23 
  -1  11   0   17.88    1.59 
   2 -11   0  257.18   16.17 
   2 -11   0  262.26   16.19 
   2 -11   0  256.89   16.08 
   2 -11   0  258.75   16.22 
  -2 -11   0  272.10   16.20 
   2 -11   0  265.10   16.07 
   2 -11   0  267.44   16.40 
  -2 -11   0  266.15   16.27 
  -2 -11   0  279.75   16.17 
  -2  11   0  286.47   16.24 
   2  11   0  274.28   16.37 
   2  11   0  278.50   16.36 
   2  11   0  257.39   16.16 
   2  11   0  246.06   16.28 
   2  11   0  286.72   16.25 
   2  11   0  260.21   16.15 
   2  11   0  269.03   16.30 
  -2  11   0  272.71   16.22 
   2  11   0  234.58   16.30 
   2  11   0  268.19   16.23 
  -2  11   0  287.15   16.35 
   3 -11   0    9.53    1.10 
   3 -11   0   10.23    1.13 
   3 -11   0   10.10    0.97 
   3 -11   0   10.28    1.19 
  -3 -11   0   10.34    1.06 
   3 -11   0    8.79    1.15 
   3  11   0   11.52    0.91 
  -3  11   0   10.23    1.14 
   3  11   0   11.82    1.70 
   3  11   0    8.95    1.28 
  -3  11   0    8.60    1.46 
   3  11   0    9.14    1.18 
  -3  11   0    9.40    0.96 
   3  11   0    9.48    1.04 
   3  11   0   10.08    1.13 
  -3  11   0   11.02    1.23 
   3  11   0    9.83    1.03 
   3  11   0   10.67    1.30 
   4 -11   0    1.83    0.53 
   4 -11   0    1.32    0.90 
  -4 -11   0    1.70    0.80 
   4 -11   0    0.98    0.75 
   4 -11   0    1.60    0.59 
   4  11   0    2.99    0.93 
   4  11   0    1.04    0.75 
  -4  11   0    0.91    0.75 
   4  11   0    1.16    1.81 
   5 -11   0   -0.35    0.83 
   5 -11   0    1.14    0.47 
   5 -11   0    1.35    1.06 
   5 -11   0    1.14    0.82 
   5 -11   0    0.13    0.67 
   5 -11   0    0.52    0.41 
   5 -11   0    0.91    0.49 
   5  11   0    1.28    0.28 
   5  11   0    0.95    0.39 
   5  11   0    1.46    0.68 
   5  11   0    1.09    0.89 
   5  11   0    0.52    0.64 
   5  11   0    0.90    0.33 
   5  11   0    1.45    1.05 
   6 -11   0    0.64    0.22 
   6 -11   0    0.50    0.36 
   6 -11   0    0.72    0.28 
   6 -11   0    0.69    0.75 
   6 -11   0    0.66    0.20 
   6 -11   0    0.06    0.84 
   6  11   0    0.35    0.76 
   6  11   0    0.46    0.20 
   6  11   0    0.59    0.58 
   0 -12   0    4.17    0.93 
   0 -12   0    5.19    1.05 
   0 -12   0    4.28    1.32 
   0 -12   0    4.86    1.01 
   0 -12   0    5.04    0.72 
   0  12   0    4.16    0.92 
   0  12   0    4.92    0.85 
   0  12   0    5.31    1.06 
   0  12   0    4.66    1.07 
   0  12   0    5.47    0.86 
   0  12   0    3.40    0.81 
   0  12   0    5.48    1.10 
   0  12   0    5.13    0.97 
  -1 -12   0   26.49    1.91 
   1 -12   0   22.95    1.91 
   1 -12   0   25.15    2.08 
   1 -12   0   24.75    1.69 
  -1 -12   0   22.44    1.87 
  -1 -12   0   22.80    1.80 
   1 -12   0   21.74    1.83 
   1 -12   0   24.32    1.69 
   1 -12   0   23.83    1.78 
   1 -12   0   24.59    1.70 
   1 -12   0   23.64    1.67 
   1  12   0   24.40    1.65 
   1  12   0   23.97    1.66 
  -1  12   0   24.84    2.03 
  -1  12   0   24.58    1.92 
   1  12   0   23.13    1.81 
   1  12   0   21.84    1.91 
  -1  12   0   24.14    1.80 
   1  12   0   20.61    1.94 
   1  12   0   26.14    1.69 
   1  12   0   23.35    1.81 
   1  12   0   25.25    1.66 
  -1  12   0   21.11    1.80 
   1  12   0   23.68    1.53 
   1  12   0   21.23    1.69 
   1  12   0   19.36    1.76 
  -2 -12   0   77.01    4.86 
  -2 -12   0   80.15    4.89 
  -2 -12   0   76.26    4.71 
   2 -12   0   74.92    4.49 
   2 -12   0   70.30    4.61 
   2 -12   0   75.09    4.73 
   2 -12   0   78.33    4.60 
   2 -12   0   71.44    4.76 
   2 -12   0   73.70    4.81 
   2 -12   0   76.43    5.01 
   2 -12   0   68.83    4.90 
  -2  12   0   71.54    4.80 
  -2  12   0   75.66    4.89 
  -2  12   0   77.32    4.79 
   2  12   0   73.61    4.71 
  -2  12   0   78.06    5.07 
   2  12   0   76.73    4.98 
   2  12   0   66.52    4.88 
   2  12   0   75.52    4.76 
   2  12   0   74.11    4.86 
   2  12   0   71.68    4.67 
   2  12   0   80.20    4.98 
   3 -12   0    4.21    1.23 
   3 -12   0    3.09    1.27 
   3 -12   0    2.40    0.90 
   3 -12   0    2.31    0.88 
   3 -12   0    2.40    0.72 
   3 -12   0    2.48    0.83 
   3 -12   0    2.94    0.94 
  -3 -12   0    1.58    0.93 
  -3 -12   0    2.60    0.82 
   3 -12   0    2.53    0.87 
   3  12   0    3.24    0.86 
   3  12   0    1.48    0.90 
   3  12   0    2.93    0.82 
   3  12   0    3.89    1.05 
   3  12   0    3.45    0.86 
   3  12   0    2.04    0.69 
   3  12   0    2.96    1.42 
   3  12   0    2.25    0.70 
   3  12   0    1.60    0.97 
  -3  12   0    3.53    0.95 
   3  12   0    2.02    0.76 
  -3  12   0    2.75    1.01 
  -3  12   0    3.14    1.24 
  -3  12   0    2.35    0.93 
   4 -12   0   48.33    3.51 
  -4 -12   0   45.69    3.31 
   4 -12   0   57.20    3.91 
   4 -12   0   52.16    3.13 
   4 -12   0   52.63    3.42 
   4 -12   0   48.69    3.21 
  -4  12   0   47.68    3.41 
   4  12   0   48.64    3.39 
   4  12   0   49.00    3.40 
   5 -12   0   -0.20    0.45 
   5 -12   0    0.03    0.45 
   5 -12   0   -0.41    0.67 
   5 -12   0   -0.85    0.79 
   5 -12   0    0.12    0.77 
   5 -12   0   -0.42    0.97 
   5 -12   0    0.04    0.47 
   5  12   0   -0.45    0.43 
   5  12   0    0.21    0.32 
   5  12   0    0.68    0.71 
   5  12   0    0.52    1.00 
   5  12   0    0.33    0.65 
   5  12   0    0.31    1.03 
   6 -12   0    2.43    1.00 
   6 -12   0    2.85    0.45 
   6 -12   0    2.84    1.25 
   6 -12   0    3.07    0.34 
   6 -12   0    2.51    0.31 
   6 -12   0    1.83    0.52 
   6  12   0    3.47    0.36 
   6  12   0    1.69    0.65 
   0 -13   0   -0.02    0.75 
   0 -13   0    0.63    0.66 
   0 -13   0    0.31    0.54 
   0 -13   0    0.30    0.69 
   0  13   0    0.58    0.72 
   0  13   0    0.37    0.68 
   0  13   0    0.22    0.61 
   0  13   0   -0.18    0.85 
   0  13   0    0.26    0.88 
   0  13   0   -0.99    0.70 
   1 -13   0   10.83    1.05 
   1 -13   0   10.10    1.16 
   1 -13   0   11.87    1.07 
   1 -13   0   12.59    1.06 
   1 -13   0   11.79    1.50 
   1 -13   0    9.75    1.05 
  -1 -13   0   11.37    1.26 
   1 -13   0    9.43    1.25 
  -1 -13   0   13.48    1.34 
   1 -13   0   10.86    1.25 
  -1 -13   0   10.82    1.27 
   1  13   0   12.15    1.23 
   1  13   0   10.17    1.09 
   1  13   0   10.56    1.31 
   1  13   0   11.74    1.03 
  -1  13   0   11.36    1.22 
   1  13   0    9.98    1.19 
   1  13   0   11.93    0.86 
  -1  13   0   12.39    1.37 
  -1  13   0   12.00    1.43 
   1  13   0   11.37    1.44 
   1  13   0   13.04    1.11 
   1  13   0   12.00    1.05 
  -1  13   0   11.77    1.26 
   1  13   0   11.46    1.04 
   1  13   0   11.02    1.06 
   1  13   0   11.30    1.27 
   2 -13   0   13.16    1.33 
   2 -13   0   12.01    1.40 
   2 -13   0   13.30    1.00 
   2 -13   0   10.43    0.93 
   2 -13   0   10.59    1.33 
   2 -13   0   12.67    1.29 
   2 -13   0   10.97    1.00 
   2 -13   0   12.78    0.81 
  -2 -13   0   11.53    1.38 
   2 -13   0   13.29    1.52 
   2 -13   0   13.70    1.26 
  -2 -13   0   13.19    1.20 
   2 -13   0   12.42    1.17 
   2  13   0   11.60    2.09 
   2  13   0   11.74    1.52 
  -2  13   0   14.05    1.62 
   2  13   0   13.69    1.18 
  -2  13   0   10.92    1.33 
   2  13   0   14.99    1.41 
   2  13   0   14.02    1.34 
  -2  13   0   12.55    1.31 
  -2  13   0   14.30    1.54 
   2  13   0   14.40    1.27 
   2  13   0   13.65    1.65 
  -3 -13   0   15.70    1.35 
   3 -13   0   13.66    1.43 
  -3 -13   0   15.00    1.61 
   3 -13   0   14.99    1.47 
   3 -13   0   13.31    1.53 
   3 -13   0   14.23    1.26 
   3 -13   0   14.45    1.44 
   3 -13   0   14.80    1.38 
   3 -13   0   12.03    1.63 
  -3  13   0   13.46    1.58 
   3  13   0   11.58    1.67 
   3  13   0   15.55    1.31 
   3  13   0   15.02    1.54 
  -3  13   0   15.81    1.49 
   3  13   0   16.47    2.07 
  -3  13   0   13.88    1.89 
  -3  13   0   15.19    1.86 
   3  13   0   15.46    1.58 
   3  13   0   14.71    1.30 
   3  13   0   16.24    1.49 
   3  13   0   16.70    1.25 
   3  13   0   13.12    1.37 
   4 -13   0   12.64    1.60 
   4 -13   0   12.49    1.02 
   4 -13   0   12.41    1.53 
   4 -13   0   12.05    1.67 
  -4 -13   0   12.54    1.30 
   4 -13   0   12.52    1.18 
   4  13   0   13.12    1.53 
   4  13   0   10.92    1.47 
   5 -13   0    1.57    0.86 
   5 -13   0    0.94    1.00 
   5 -13   0    2.16    0.51 
   5 -13   0    1.50    0.48 
   5 -13   0    1.69    0.77 
   5 -13   0    1.62    0.71 
   5  13   0    1.36    0.47 
   5  13   0    2.03    0.74 
   5  13   0    1.68    0.41 
   5  13   0    1.55    1.01 
   5  13   0    1.86    0.78 
   5  13   0    2.30    0.68 
   6 -13   0    0.01    0.35 
   6 -13   0    0.05    0.18 
   6 -13   0   -0.76    0.79 
   6 -13   0   -0.73    0.63 
   6 -13   0    0.08    0.27 
   6 -13   0   -0.05    0.20 
   6  13   0    0.02    0.20 
   6  13   0    0.09    0.55 
   0 -14   0  185.13   11.64 
   0 -14   0  189.97   11.65 
   0 -14   0  192.46   11.58 
   0 -14   0  187.21   11.76 
   0 -14   0  184.94   12.08 
   0  14   0  197.30   11.63 
   0  14   0  202.30   11.85 
   0  14   0  178.86   11.65 
   0  14   0  178.62   11.68 
   0  14   0  194.64   11.54 
   0  14   0  182.55   11.52 
   0  14   0  206.99   11.59 
   0  14   0  188.08   11.64 
   1 -14   0   24.91    1.90 
   1 -14   0   24.67    1.77 
  -1 -14   0   23.82    1.93 
   1 -14   0   23.94    2.12 
   1 -14   0   23.38    1.76 
   1 -14   0   23.56    1.95 
  -1 -14   0   26.66    2.02 
  -1 -14   0   26.47    2.01 
   1 -14   0   23.76    1.78 
   1 -14   0   20.89    1.76 
   1 -14   0   25.68    2.21 
   1  14   0   25.43    1.76 
   1  14   0   25.38    1.92 
   1  14   0   21.93    1.88 
   1  14   0   24.19    2.05 
   1  14   0   22.79    2.07 
   1  14   0   26.15    1.77 
   1  14   0   23.76    1.77 
  -1  14   0   25.62    2.17 
  -1  14   0   25.63    1.94 
  -1  14   0   27.41    2.11 
   1  14   0   25.66    1.94 
   1  14   0   23.02    1.74 
   1  14   0   25.11    1.73 
  -1  14   0   25.51    1.96 
   2 -14   0    1.36    0.71 
   2 -14   0    1.85    0.82 
   2 -14   0    0.92    0.73 
   2 -14   0    0.88    0.93 
   2 -14   0    1.11    0.88 
   2 -14   0    0.38    0.34 
  -2 -14   0    1.14    0.82 
   2 -14   0    0.78    0.69 
   2 -14   0    0.32    0.50 
   2 -14   0    1.14    0.25 
   2 -14   0    0.52    0.40 
  -2 -14   0    1.38    0.82 
   2 -14   0    1.24    0.83 
   2  14   0    0.33    0.62 
   2  14   0    0.76    0.72 
  -2  14   0    0.72    1.05 
  -2  14   0    1.08    0.72 
  -2  14   0    0.67    0.76 
   2  14   0    0.43    0.78 
  -2  14   0    0.81    1.11 
   2  14   0    1.39    0.71 
   2  14   0    0.15    1.15 
   2  14   0    0.72    0.73 
   2  14   0    0.50    0.70 
   3 -14   0    2.92    1.13 
   3 -14   0    3.78    1.01 
  -3 -14   0    3.07    0.92 
   3 -14   0    3.28    0.88 
   3 -14   0    3.28    0.97 
   3 -14   0    2.59    1.06 
  -3 -14   0    3.86    1.14 
   3 -14   0    4.03    1.24 
   3  14   0    4.41    0.98 
  -3  14   0    3.63    1.23 
   3  14   0    3.25    1.00 
   3  14   0    3.85    1.18 
   3  14   0    4.46    0.97 
   3  14   0    4.74    0.88 
  -3  14   0    2.87    1.14 
   3  14   0    4.03    1.12 
  -3  14   0    4.77    1.10 
  -3  14   0    0.42    1.13 
   3  14   0    4.67    0.95 
   3  14   0    3.79    1.68 
   4 -14   0    2.75    0.84 
   4 -14   0    1.94    1.05 
   4 -14   0    2.81    1.04 
   4 -14   0    2.14    0.68 
   4 -14   0    3.00    1.16 
  -4 -14   0    2.07    0.94 
   4 -14   0    2.25    0.83 
   4  14   0    3.80    1.27 
   4  14   0    2.17    1.05 
   4  14   0    1.24    0.97 
   5 -14   0    6.20    0.71 
   5 -14   0    4.98    0.73 
   5 -14   0    5.74    1.09 
   5 -14   0    4.77    1.12 
   5 -14   0    4.45    1.47 
   5 -14   0    4.69    1.28 
   5  14   0    4.82    1.37 
   5  14   0    5.84    0.74 
   5  14   0    7.12    1.04 
   5  14   0    5.32    0.72 
   5  14   0    6.02    0.67 
   5  14   0    4.63    1.12 
   5  14   0    6.49    0.81 
   5  14   0    4.85    0.55 
   6 -14   0    0.07    0.31 
   6 -14   0   -0.14    0.58 
   6 -14   0   -0.03    0.26 
   6 -14   0    0.03    0.33 
   6 -14   0    0.53    0.78 
   6 -14   0    0.03    0.20 
   6 -14   0    0.13    0.19 
   6  14   0   -0.20    0.48 
   6  14   0    0.12    0.24 
   0 -15   0    0.62    0.74 
   0 -15   0    0.95    0.82 
   0 -15   0    0.05    0.61 
   0 -15   0   -0.21    0.83 
   0  15   0   -0.11    0.70 
   0  15   0    0.06    0.90 
   0  15   0   -0.26    0.89 
   0  15   0   -0.64    0.90 
   0  15   0   -0.17    0.99 
   0  15   0    0.89    1.08 
   0  15   0    0.26    0.63 
   0  15   0   -0.08    0.62 
   0  15   0    0.17    0.68 
   1 -15   0   95.69    6.00 
   1 -15   0   93.55    5.90 
  -1 -15   0   94.94    6.10 
   1 -15   0  101.62    5.89 
   1 -15   0   99.38    5.96 
   1 -15   0   96.22    6.09 
  -1 -15   0   85.08    6.04 
   1 -15   0   91.14    5.86 
   1 -15   0   91.42    5.89 
   1 -15   0   89.73    6.28 
  -1 -15   0   97.36    5.98 
  -1  15   0   98.08    5.98 
   1  15   0   86.65    5.84 
   1  15   0   90.67    5.84 
   1  15   0   84.92    6.16 
   1  15   0   96.21    5.83 
   1  15   0   95.83    5.86 
  -1  15   0   89.25    6.07 
   1  15   0   91.49    5.95 
   1  15   0  100.78    5.88 
   1  15   0   93.49    6.00 
   1  15   0  100.86    6.03 
   1  15   0   96.15    5.83 
  -1  15   0   98.19    6.27 
   2 -15   0   13.06    1.50 
   2 -15   0   12.36    0.81 
  -2 -15   0    9.70    1.39 
   2 -15   0    9.38    0.97 
   2 -15   0   11.47    1.22 
   2 -15   0   11.70    1.36 
   2 -15   0   13.45    1.38 
   2 -15   0   14.42    1.35 
   2 -15   0   13.04    1.62 
   2 -15   0   13.22    1.43 
  -2 -15   0   14.17    1.47 
  -2  15   0   13.29    1.48 
  -2  15   0   13.40    1.38 
   2  15   0   11.92    1.42 
  -2  15   0    8.45    1.38 
   2  15   0   11.76    1.61 
   2  15   0   12.34    1.37 
   2  15   0   13.02    1.20 
   2  15   0   12.30    1.26 
   2  15   0   12.63    1.16 
   2  15   0   12.45    1.82 
   2  15   0   12.53    1.27 
  -2  15   0   11.18    1.66 
   2  15   0   13.21    1.23 
   3 -15   0   18.48    1.65 
   3 -15   0   16.96    1.61 
  -3 -15   0   11.16    1.64 
   3 -15   0   16.33    1.69 
   3 -15   0   18.51    1.58 
  -3 -15   0   18.45    1.73 
   3 -15   0   16.77    1.56 
   3 -15   0   15.59    2.03 
   3  15   0   17.01    1.53 
   3  15   0   17.31    1.46 
  -3  15   0   15.35    2.06 
   3  15   0   17.47    1.53 
  -3  15   0   17.23    1.83 
   3  15   0   15.16    1.72 
   3  15   0   17.10    2.22 
  -3  15   0   14.62    2.01 
   3  15   0   17.27    1.98 
   3  15   0   17.33    1.62 
  -3  15   0   18.27    1.67 
   3  15   0   19.48    1.54 
   4 -15   0    2.11    0.68 
   4 -15   0    1.03    0.88 
   4 -15   0    2.88    0.94 
   4 -15   0    1.50    1.01 
   4 -15   0    1.64    0.83 
   4 -15   0    2.19    1.10 
   4  15   0    2.10    0.98 
   4  15   0    1.93    0.99 
   4  15   0    1.31    1.05 
   5 -15   0    3.07    1.04 
   5 -15   0    2.21    0.64 
   5 -15   0    2.24    0.76 
   5 -15   0    1.53    0.85 
   5 -15   0    2.55    1.05 
   5 -15   0    2.95    0.65 
   5  15   0    3.01    0.45 
   5  15   0    3.20    0.60 
   5  15   0    2.98    0.70 
   5  15   0    3.74    1.08 
   5  15   0    3.32    0.62 
   5  15   0    2.79    1.05 
   5  15   0    2.53    0.60 
   5  15   0    3.71    0.79 
   6 -15   0    5.00    0.55 
   6 -15   0    3.65    0.95 
   6 -15   0    3.98    0.46 
   6 -15   0    3.56    0.47 
   6 -15   0    3.28    0.78 
   6  15   0    2.90    0.72 
   6  15   0    4.38    0.43 
   0 -16   0    7.39    1.17 
   0 -16   0    7.47    1.26 
   0 -16   0    8.93    0.96 
   0  16   0    7.01    1.24 
   0  16   0    9.86    1.81 
   0  16   0    7.97    1.32 
   0  16   0    8.62    1.02 
   0  16   0    7.66    1.20 
   0  16   0    6.83    1.22 
   0  16   0    8.04    1.47 
   0  16   0    8.20    1.15 
   0  16   0    7.76    1.02 
  -1 -16   0   16.39    1.64 
   1 -16   0   15.05    1.87 
   1 -16   0   13.37    1.34 
   1 -16   0   17.10    1.37 
  -1 -16   0   14.12    1.66 
   1 -16   0   17.48    1.82 
   1 -16   0   16.87    1.61 
   1 -16   0   18.09    1.60 
   1 -16   0   15.72    1.53 
   1 -16   0   17.61    1.39 
   1  16   0   12.89    1.62 
   1  16   0   16.24    1.52 
   1  16   0   16.26    1.54 
  -1  16   0   16.02    2.09 
   1  16   0   19.97    1.37 
   1  16   0   17.26    1.41 
  -1  16   0   12.20    1.57 
  -1  16   0   18.46    1.59 
   1  16   0   14.73    1.31 
  -1  16   0   16.87    1.82 
   1  16   0   15.72    1.36 
   1  16   0   15.59    1.39 
   1  16   0   18.20    1.75 
   1  16   0   16.85    1.34 
   1  16   0   17.43    1.37 
  -1  16   0   17.19    1.99 
  -2 -16   0    2.73    1.14 
   2 -16   0    3.63    1.16 
   2 -16   0    3.09    1.47 
  -2 -16   0    4.01    1.15 
   2 -16   0    2.88    1.01 
   2 -16   0    3.38    0.98 
   2 -16   0    4.16    1.12 
   2 -16   0    3.88    1.08 
   2 -16   0    3.86    0.39 
   2 -16   0    2.71    0.62 
   2 -16   0    3.70    0.97 
   2  16   0    2.97    1.10 
   2  16   0    3.18    0.98 
   2  16   0    1.74    1.34 
   2  16   0    3.72    0.88 
  -2  16   0    3.19    1.08 
   2  16   0    2.84    1.04 
  -2  16   0    4.43    1.22 
   2  16   0    3.36    1.47 
  -2  16   0    2.90    1.13 
   2  16   0    3.61    1.07 
   2  16   0    2.37    0.80 
  -2  16   0    1.10    0.90 
   2  16   0    3.17    0.96 
  -2  16   0    2.74    1.29 
   3 -16   0   56.91    3.92 
   3 -16   0   58.10    3.90 
   3 -16   0   59.01    4.05 
  -3 -16   0   61.39    4.11 
   3 -16   0   59.61    3.95 
   3 -16   0   60.21    3.89 
  -3  16   0   52.26    4.22 
   3  16   0   56.93    3.85 
  -3  16   0   60.12    4.01 
   3  16   0   57.06    3.80 
   3  16   0   62.28    3.92 
   3  16   0   57.01    3.90 
  -3  16   0   56.12    4.10 
   3  16   0   56.03    3.96 
  -3  16   0   59.02    4.48 
   3  16   0   58.32    4.52 
   3  16   0   63.01    3.81 
   3  16   0   64.57    4.10 
   4 -16   0    0.97    0.80 
   4 -16   0    1.32    0.56 
   4 -16   0    0.68    0.82 
   4 -16   0    0.26    0.84 
   4 -16   0    0.26    0.74 
   4 -16   0    0.48    0.97 
   4 -16   0    0.28    0.49 
   4 -16   0    0.65    0.63 
   4 -16   0    0.19    1.05 
   4 -16   0    0.70    0.65 
   4  16   0    0.49    0.61 
   4  16   0    0.49    0.64 
   4  16   0    0.91    0.59 
  -4  16   0    2.02    1.48 
   4  16   0    1.89    1.04 
   4  16   0    2.04    0.98 
   4  16   0    0.33    0.99 
   5 -16   0    5.84    0.97 
   5 -16   0    4.94    0.72 
   5 -16   0    4.57    1.37 
   5 -16   0    4.00    1.11 
   5 -16   0    5.04    1.40 
   5 -16   0    5.49    0.72 
   5  16   0    4.81    0.55 
   5  16   0    4.95    0.91 
   5  16   0    5.75    0.73 
   5  16   0    5.39    0.65 
   5  16   0    4.96    0.66 
   5  16   0    5.51    0.66 
   5  16   0    5.41    1.08 
   5  16   0    5.89    1.36 
   6 -16   0    5.18    0.54 
   6 -16   0    4.56    0.47 
   6 -16   0    4.92    0.47 
   6 -16   0    2.87    0.69 
   6 -16   0    6.85    0.98 
   6  16   0    5.31    0.70 
   6  16   0    4.84    0.42 
   0 -17   0    0.67    0.89 
   0 -17   0    0.42    0.84 
   0 -17   0    0.04    0.73 
   0  17   0    1.26    0.99 
   0  17   0   -0.50    0.64 
   0  17   0    0.46    1.06 
   0  17   0    0.76    0.79 
   0  17   0    0.85    1.04 
   0  17   0    0.08    0.84 
   0  17   0    0.84    0.70 
   0  17   0   -0.18    1.03 
   1 -17   0   -0.31    0.75 
   1 -17   0   -0.75    0.78 
  -1 -17   0    0.87    0.98 
   1 -17   0    0.21    0.96 
   1 -17   0   -1.11    0.85 
   1 -17   0   -0.03    0.71 
   1 -17   0   -0.25    0.91 
   1 -17   0   -0.53    0.60 
  -1 -17   0    0.89    0.83 
   1  17   0    0.85    0.65 
   1  17   0    0.91    0.75 
  -1  17   0   -0.35    1.00 
   1  17   0    0.34    0.66 
   1  17   0   -0.63    0.71 
   1  17   0    0.55    0.89 
   1  17   0    0.08    0.95 
   1  17   0   -0.02    0.72 
  -1  17   0    0.01    0.78 
   1  17   0    0.03    0.71 
   1  17   0    1.52    0.87 
  -1  17   0    0.63    1.07 
  -1  17   0    0.14    1.24 
  -1  17   0   -0.30    0.79 
   1  17   0    0.31    0.65 
   2 -17   0   27.70    2.27 
   2 -17   0   26.68    2.14 
  -2 -17   0   27.63    2.28 
   2 -17   0   27.62    1.63 
   2 -17   0   23.86    1.96 
   2 -17   0   29.22    2.17 
   2 -17   0   23.55    2.15 
   2 -17   0   26.46    2.21 
   2  17   0   28.74    2.06 
   2  17   0   28.32    2.11 
  -2  17   0   19.95    2.43 
  -2  17   0   24.14    2.23 
   2  17   0   27.27    1.98 
   2  17   0   26.93    2.16 
  -2  17   0   25.18    2.48 
   2  17   0   25.06    2.20 
  -2  17   0   27.27    2.19 
   2  17   0   24.80    1.95 
   2  17   0   27.17    2.50 
   3 -17   0    2.81    1.14 
  -3 -17   0    3.79    1.30 
   3 -17   0    4.30    1.16 
   3 -17   0    5.57    1.17 
   3 -17   0    4.72    1.50 
   3 -17   0    6.23    1.09 
   3 -17   0    3.70    1.41 
   3  17   0    4.98    1.62 
   3  17   0    3.78    1.11 
  -3  17   0    5.58    1.64 
   3  17   0    4.36    1.42 
  -3  17   0    1.26    1.40 
  -3  17   0    3.92    1.22 
   3  17   0    3.78    1.06 
   3  17   0    5.06    1.13 
   3  17   0    3.29    1.14 
   3  17   0    5.71    1.17 
   3  17   0    1.54    1.71 
   4 -17   0    3.47    0.79 
   4 -17   0    3.23    0.99 
   4 -17   0    4.07    1.19 
   4 -17   0    3.48    1.07 
   4 -17   0    4.34    0.80 
   4 -17   0    4.27    0.65 
   4 -17   0    4.63    1.45 
   4 -17   0    3.60    0.74 
   4 -17   0    4.90    1.28 
   4 -17   0    4.01    1.48 
   4 -17   0    3.81    0.75 
   4 -17   0    3.91    0.99 
   4  17   0    4.30    0.73 
   4  17   0    4.44    0.81 
   4  17   0    4.70    0.80 
   4  17   0    4.33    0.94 
   4  17   0    6.55    1.43 
   4  17   0    4.33    1.26 
   4  17   0    4.35    1.09 
   5 -17   0    3.50    1.21 
   5 -17   0    2.65    1.27 
   5 -17   0    3.79    0.97 
   5 -17   0    4.45    0.66 
   5 -17   0    4.08    0.64 
   5 -17   0    3.99    0.96 
   5  17   0    4.22    0.66 
   5  17   0    4.31    0.64 
   5  17   0    3.42    1.01 
   5  17   0    4.23    0.61 
   5  17   0    4.06    0.66 
   5  17   0    3.41    0.48 
   5  17   0    3.08    0.83 
   5  17   0    3.86    1.27 
   6 -17   0    0.14    0.26 
   6 -17   0    0.31    0.38 
   6 -17   0   -0.05    0.21 
   6 -17   0    0.13    0.26 
   6  17   0   -0.25    0.37 
   6  17   0    0.16    0.18 
   0 -18   0   10.09    1.38 
   0 -18   0    9.85    1.42 
   0  18   0   11.39    1.45 
   0  18   0    9.52    1.25 
   0  18   0   10.01    1.62 
   0  18   0    9.92    1.44 
   0  18   0   10.52    1.37 
   0  18   0    9.65    1.17 
   0  18   0   10.69    1.58 
   0  18   0    9.56    1.48 
   1 -18   0   18.24    1.70 
   1 -18   0   22.11    1.65 
   1 -18   0   18.57    2.05 
   1 -18   0   21.95    1.82 
  -1 -18   0   20.29    1.90 
   1 -18   0   20.62    1.78 
  -1 -18   0   20.75    2.02 
   1 -18   0   20.52    1.89 
   1  18   0   21.69    1.71 
  -1  18   0   18.95    1.94 
   1  18   0   20.55    1.71 
   1  18   0   22.10    1.64 
   1  18   0   18.34    1.59 
   1  18   0   21.33    1.86 
  -1  18   0   20.06    2.10 
   1  18   0   18.41    1.73 
   1  18   0   20.19    1.55 
  -1  18   0   22.40    1.91 
   1  18   0   20.80    2.34 
  -1  18   0   20.88    1.61 
  -1  18   0   20.31    1.89 
   1  18   0   20.86    1.99 
   1  18   0   19.73    1.59 
  -1  18   0   16.78    2.08 
   2 -18   0   15.68    1.69 
   2 -18   0   14.22    1.76 
   2 -18   0   13.50    1.42 
  -2 -18   0   15.72    1.75 
   2 -18   0   14.64    0.93 
   2 -18   0   13.70    1.58 
   2 -18   0   11.59    1.66 
   2  18   0   13.89    1.96 
   2  18   0   14.57    1.53 
  -2  18   0   10.50    1.84 
   2  18   0   15.54    1.48 
   2  18   0   15.19    1.82 
   2  18   0   15.23    1.62 
   2  18   0   14.98    1.32 
   2  18   0   13.93    1.69 
  -2  18   0   17.54    1.86 
  -2  18   0   13.32    1.59 
  -2  18   0   13.36    1.74 
   3 -18   0   14.14    1.81 
   3 -18   0   16.47    1.59 
   3 -18   0   14.33    1.65 
   3 -18   0   15.78    1.09 
   3 -18   0   16.90    1.62 
  -3 -18   0   18.32    1.86 
   3 -18   0   16.47    1.77 
   3 -18   0   16.69    1.75 
   3  18   0   17.71    1.74 
   3  18   0   15.60    2.48 
  -3  18   0   16.29    1.95 
   3  18   0   15.59    1.51 
   3  18   0   12.53    1.62 
  -3  18   0   16.51    1.76 
   3  18   0   18.05    1.60 
   3  18   0   15.87    1.74 
   3  18   0   16.40    1.61 
  -3  18   0   14.22    2.21 
   3  18   0   18.22    2.14 
   4 -18   0    6.41    1.52 
   4 -18   0    6.04    0.87 
   4 -18   0    6.24    1.12 
   4 -18   0    5.43    1.53 
   4 -18   0    6.73    0.81 
   4 -18   0    6.32    0.86 
   4 -18   0    5.87    1.22 
   4 -18   0    6.72    1.30 
   4 -18   0    5.66    0.70 
   4 -18   0    4.63    1.11 
   4 -18   0    6.35    0.79 
   4  18   0    5.54    1.00 
   4  18   0    9.84    1.54 
   4  18   0    6.28    0.82 
   4  18   0    7.76    1.23 
   4  18   0    5.46    1.27 
   4  18   0    6.33    0.92 
   4  18   0    6.54    0.79 
   5 -18   0    9.73    1.12 
   5 -18   0   10.28    0.91 
   5 -18   0   11.11    1.27 
   5 -18   0   10.11    1.13 
   5 -18   0   11.69    0.87 
   5 -18   0   10.36    1.46 
   5  18   0    9.66    0.87 
   5  18   0   10.45    1.07 
   5  18   0   10.98    0.89 
   5  18   0   10.88    0.92 
   5  18   0   10.24    0.83 
   5  18   0    8.52    0.78 
   5  18   0   10.27    1.23 
   0 -19   0   -0.57    0.86 
   0 -19   0    0.22    0.97 
   0  19   0   -0.36    1.04 
   0  19   0   -0.05    0.86 
   0  19   0    0.13    1.07 
   0  19   0    2.64    0.98 
   0  19   0   -0.35    0.69 
   0  19   0   -0.17    1.05 
   0  19   0    0.78    0.98 
  -1 -19   0    3.28    1.28 
   1 -19   0    3.35    1.14 
   1 -19   0    3.28    0.91 
   1 -19   0    3.45    1.49 
   1 -19   0    3.17    1.26 
   1 -19   0    3.46    1.14 
   1 -19   0    4.53    1.15 
  -1  19   0    2.96    1.00 
  -1  19   0    1.00    1.19 
   1  19   0    2.31    0.93 
   1  19   0    2.74    0.86 
   1  19   0    3.25    1.00 
   1  19   0    3.85    0.93 
  -1  19   0    3.16    1.31 
  -1  19   0    3.11    1.15 
   1  19   0    4.13    1.23 
   1  19   0    3.08    1.23 
   1  19   0    3.15    0.76 
   1  19   0    3.68    0.86 
  -1  19   0    3.39    1.03 
  -1  19   0    1.85    1.18 
   1  19   0    3.00    1.09 
  -2 -19   0    5.46    1.37 
   2 -19   0    3.74    1.32 
   2 -19   0    4.88    1.07 
   2 -19   0    4.84    1.46 
   2 -19   0    3.82    1.24 
   2 -19   0    3.99    1.38 
   2  19   0    4.95    1.10 
   2  19   0    6.49    1.37 
  -2  19   0    4.59    1.52 
  -2  19   0    6.68    1.78 
   2  19   0    6.23    1.76 
   2  19   0    5.50    1.16 
   2  19   0    4.33    1.59 
   2  19   0    5.36    1.30 
   2  19   0    2.88    0.90 
  -2  19   0    5.37    1.31 
   3 -19   0    1.23    1.15 
   3 -19   0    2.41    1.16 
   3 -19   0    1.90    0.54 
   3 -19   0    0.46    0.94 
   3 -19   0    2.53    1.12 
   3 -19   0    2.64    1.15 
   3 -19   0    1.27    1.00 
  -3 -19   0    2.23    1.20 
   3  19   0    2.76    1.02 
   3  19   0    2.49    2.11 
  -3  19   0    1.82    1.02 
  -3  19   0    2.99    1.27 
   3  19   0    3.21    1.04 
   3  19   0    2.35    0.74 
   3  19   0    1.37    1.02 
   3  19   0    1.66    1.03 
  -3  19   0    3.25    1.53 
   3  19   0    1.59    0.92 
   4 -19   0    2.02    0.57 
   4 -19   0    2.54    1.38 
   4 -19   0    0.44    0.80 
   4 -19   0    1.32    0.85 
   4 -19   0    2.15    0.75 
   4 -19   0    2.54    1.10 
   4 -19   0    2.25    0.95 
   4 -19   0    2.38    0.67 
   4 -19   0   -0.45    1.00 
   4 -19   0    0.61    0.51 
   4 -19   0    2.03    0.55 
   4  19   0    0.70    1.17 
   4  19   0    0.49    0.91 
   4  19   0    0.57    0.58 
   4  19   0    1.14    0.60 
   4  19   0    1.35    0.54 
   4  19   0    2.34    0.99 
   4  19   0    2.61    0.62 
   5 -19   0   13.09    0.96 
   5 -19   0   13.18    0.97 
   5 -19   0    9.66    1.41 
   5 -19   0   10.19    1.14 
   5  19   0   12.32    1.01 
   5  19   0   12.55    1.07 
   5  19   0   11.61    0.93 
   5  19   0   13.27    0.91 
   5  19   0   11.63    0.84 
   5  19   0   12.55    0.98 
   0 -20   0   85.78    5.68 
   0 -20   0   86.46    5.67 
   0 -20   0   85.66    5.72 
   0  20   0   84.90    5.57 
   0  20   0   84.05    5.76 
   0  20   0   89.93    5.71 
   0  20   0   79.37    5.59 
   0  20   0   82.94    5.74 
   0  20   0   89.01    5.53 
   0  20   0   91.71    5.46 
   1 -20   0   27.01    2.57 
   1 -20   0   29.27    2.42 
   1 -20   0   28.21    2.23 
  -1 -20   0   26.33    2.42 
   1 -20   0   25.26    2.28 
   1 -20   0   27.81    2.30 
  -1  20   0   29.10    2.55 
   1  20   0   29.69    2.19 
  -1  20   0   27.42    2.41 
  -1  20   0   29.93    2.74 
   1  20   0   29.70    2.12 
   1  20   0   29.08    2.19 
   1  20   0   30.60    2.40 
   1  20   0   28.77    2.11 
   1  20   0   28.68    2.54 
   1  20   0   29.15    2.11 
   1  20   0   29.06    2.35 
  -1  20   0   30.24    2.38 
  -1  20   0   28.49    2.21 
   2 -20   0    2.52    0.84 
   2 -20   0    3.96    1.23 
  -2 -20   0    2.94    1.27 
   2 -20   0    3.28    1.19 
   2 -20   0    3.36    0.83 
   2 -20   0    2.84    1.04 
   2 -20   0    1.03    1.16 
   2  20   0    2.12    0.89 
  -2  20   0    2.37    1.23 
  -2  20   0    2.03    1.06 
  -2  20   0    1.74    0.86 
  -2  20   0    2.69    1.25 
   2  20   0    3.60    1.65 
   2  20   0    3.77    1.05 
   2  20   0    2.76    1.31 
   2  20   0    2.41    1.52 
   2  20   0    4.56    1.16 
   2  20   0    2.13    1.05 
   3 -20   0    5.93    1.28 
   3 -20   0    7.21    0.88 
   3 -20   0    7.31    1.32 
   3 -20   0    8.19    1.43 
   3 -20   0    8.06    2.32 
   3 -20   0    8.79    1.38 
   3 -20   0    8.73    1.58 
   3 -20   0    4.96    1.19 
  -3 -20   0    7.42    1.62 
  -3  20   0    7.13    1.48 
   3  20   0    7.91    1.38 
   3  20   0    7.00    0.87 
  -3  20   0    7.47    1.71 
  -3  20   0    9.66    2.41 
   3  20   0    6.94    0.99 
   3  20   0    6.52    0.65 
   3  20   0    7.23    0.88 
   3  20   0    6.70    1.25 
   3  20   0    7.28    1.03 
   3  20   0    7.44    1.15 
   3  20   0    6.69    0.90 
   3  20   0    8.29    1.29 
   3  20   0    7.38    1.59 
   4 -20   0    0.92    0.66 
   4 -20   0    1.43    0.54 
   4 -20   0    1.44    0.91 
   4 -20   0    1.39    0.54 
   4 -20   0    0.80    0.79 
   4 -20   0    0.72    0.49 
   4 -20   0    1.80    1.07 
   4 -20   0    1.01    0.39 
   4 -20   0    0.79    0.51 
   4  20   0    1.78    0.90 
   4  20   0    0.40    0.55 
   4  20   0    0.39    0.58 
   4  20   0    0.24    0.53 
   4  20   0    1.10    0.56 
   4  20   0    1.38    0.94 
   4  20   0   -0.20    1.10 
   5 -20   0    4.45    0.82 
   5 -20   0    5.36    0.67 
   5 -20   0    3.00    1.01 
   5 -20   0    5.61    0.62 
   5  20   0    4.85    0.80 
   5  20   0    4.32    0.45 
   5  20   0    4.16    0.53 
   5  20   0    4.37    0.56 
   5  20   0    4.89    0.64 
   5  20   0    4.68    0.71 
   0 -21   0    0.47    1.15 
   0 -21   0    0.57    0.93 
   0 -21   0    1.07    1.08 
   0  21   0   -0.52    1.12 
   0  21   0   -0.21    0.80 
   0  21   0    0.42    0.92 
   0  21   0    0.23    1.20 
   0  21   0    0.46    1.12 
   0  21   0    0.33    1.18 
   1 -21   0    5.29    1.34 
   1 -21   0    7.69    1.63 
   1 -21   0    4.88    1.22 
   1 -21   0    4.45    1.26 
  -1 -21   0    3.26    1.26 
   1 -21   0    5.24    1.48 
  -1  21   0    5.16    1.15 
  -1  21   0    5.18    1.59 
   1  21   0    4.93    1.41 
  -1  21   0    4.55    1.27 
   1  21   0    4.33    1.36 
  -1  21   0    3.13    1.39 
   1  21   0    3.19    0.96 
   1  21   0    2.43    1.24 
  -1  21   0    7.18    1.72 
   1  21   0    3.52    0.98 
   1  21   0    3.66    0.95 
   1  21   0    3.57    1.17 
  -2 -21   0    0.55    1.20 
   2 -21   0    0.33    1.12 
   2 -21   0    0.44    1.13 
   2 -21   0   -0.05    1.06 
   2 -21   0   -0.01    0.77 
   2 -21   0    1.09    1.13 
   2 -21   0    0.36    0.96 
   2 -21   0    0.98    0.55 
  -2  21   0    0.14    1.13 
   2  21   0    0.32    0.98 
  -2  21   0    0.84    1.36 
  -2  21   0    0.17    1.07 
   2  21   0    1.36    1.05 
  -2  21   0    1.05    0.97 
   2  21   0   -0.03    1.00 
   2  21   0    0.04    0.87 
   2  21   0    1.11    1.50 
   2  21   0    0.25    1.32 
   3 -21   0   12.07    1.23 
   3 -21   0   11.66    1.68 
   3 -21   0   10.50    1.49 
   3 -21   0   13.64    1.73 
   3 -21   0   11.67    1.02 
   3 -21   0   10.91    1.54 
   3 -21   0   10.09    1.52 
   3  21   0    9.54    1.39 
  -3  21   0   13.51    1.86 
   3  21   0   11.60    1.50 
   3  21   0   11.11    0.92 
   3  21   0    8.70    1.83 
  -3  21   0   12.04    2.46 
   3  21   0   10.94    1.42 
   3  21   0    8.88    1.22 
   3  21   0   10.79    1.07 
   3  21   0   10.83    0.82 
   3  21   0    9.08    1.06 
   3  21   0   10.68    1.09 
   3  21   0   10.67    1.08 
   4 -21   0    2.60    0.68 
   4 -21   0    2.69    1.36 
   4 -21   0    2.99    0.52 
   4 -21   0    1.69    0.92 
   4 -21   0    2.16    0.71 
   4 -21   0    2.69    0.97 
   4 -21   0    2.14    0.68 
   4  21   0    2.45    0.70 
   4  21   0    2.77    0.74 
   4  21   0    1.67    0.99 
   4  21   0    3.34    0.79 
   4  21   0    1.73    0.84 
   4  21   0    3.94    1.31 
   4  21   0    1.90    0.59 
   5 -21   0    3.77    0.55 
   5 -21   0    2.56    0.89 
   5 -21   0    3.11    0.59 
   5  21   0    3.71    0.51 
   5  21   0    4.14    0.67 
   5  21   0    3.79    0.60 
   5  21   0    4.14    0.48 
   5  21   0    4.15    0.58 
   0 -22   0    3.33    1.28 
   0 -22   0    4.29    1.43 
   0 -22   0    4.26    1.41 
   0  22   0    3.20    1.38 
   0  22   0    2.16    0.92 
   0  22   0    2.88    1.37 
   0  22   0    3.37    1.28 
   0  22   0    1.66    1.28 
   0  22   0    3.54    1.08 
   1 -22   0    4.97    1.44 
   1 -22   0    5.88    1.57 
   1 -22   0    5.08    1.28 
  -1 -22   0    6.34    1.52 
   1 -22   0    5.68    1.71 
   1 -22   0    6.24    1.51 
   1 -22   0    7.18    0.92 
  -1  22   0    6.80    1.93 
  -1  22   0    5.57    1.42 
  -1  22   0    6.93    1.75 
   1  22   0    8.24    1.15 
   1  22   0    6.97    1.47 
   1  22   0    9.05    1.31 
  -1  22   0    3.78    1.34 
   1  22   0    7.13    1.42 
   1  22   0    7.52    1.74 
   1  22   0    7.36    1.10 
  -1  22   0    7.07    1.54 
   1  22   0    7.39    1.24 
  -1  22   0    9.22    1.24 
   2 -22   0   32.20    2.61 
   2 -22   0   33.90    2.79 
   2 -22   0   33.50    2.58 
   2 -22   0   33.94    2.65 
   2 -22   0   31.10    2.60 
  -2 -22   0   36.37    2.82 
   2 -22   0   27.97    2.59 
   2 -22   0   31.85    2.22 
  -2  22   0   31.88    2.70 
   2  22   0   30.62    2.55 
  -2  22   0   30.91    2.45 
   2  22   0   35.17    2.38 
   2  22   0   33.21    2.57 
  -2  22   0   33.40    2.79 
  -2  22   0   32.77    2.83 
   2  22   0   28.21    2.54 
   3 -22   0    2.40    1.10 
   3 -22   0    2.15    0.88 
   3 -22   0    1.29    1.05 
   3 -22   0    2.46    1.01 
   3  22   0    0.48    0.57 
   3  22   0    1.93    0.64 
   3  22   0    1.51    0.37 
   3  22   0    1.87    0.56 
   3  22   0    2.23    0.70 
   3  22   0    1.65    0.89 
   3  22   0    1.47    0.57 
   3  22   0    1.42    0.63 
  -3  22   0    2.65    1.25 
   3  22   0    2.60    1.03 
   4 -22   0    1.52    0.57 
   4 -22   0    0.15    0.85 
   4 -22   0    0.66    0.48 
   4 -22   0    0.51    0.59 
   4 -22   0    0.07    0.44 
   4 -22   0    0.26    0.32 
   4 -22   0    0.62    0.90 
   4  22   0    1.36    0.51 
   4  22   0    1.09    0.47 
   4  22   0    0.16    0.50 
   4  22   0    0.84    0.56 
   5 -22   0    3.73    0.49 
   5 -22   0    3.02    0.48 
   5  22   0    3.28    0.56 
   5  22   0    3.33    0.41 
   5  22   0    3.32    0.46 
   5  22   0    3.37    0.47 
   5  22   0    3.44    0.59 
   0 -23   0   -0.01    1.20 
   0 -23   0   -0.16    0.99 
   0 -23   0    1.30    1.21 
   0  23   0    0.40    1.23 
   0  23   0    0.65    1.30 
   0  23   0   -0.27    0.80 
   0  23   0    0.48    1.28 
   0  23   0   -0.07    1.25 
   0  23   0    0.12    0.99 
   1 -23   0   24.31    2.31 
   1 -23   0   23.30    1.97 
  -1 -23   0   24.38    2.39 
   1 -23   0   22.51    1.52 
   1 -23   0   24.19    2.19 
   1 -23   0   24.51    2.43 
   1  23   0   21.01    2.04 
   1  23   0   24.24    2.29 
   1  23   0   21.89    1.74 
  -1  23   0   22.45    2.15 
   1  23   0   22.74    2.05 
   1  23   0   21.32    2.36 
  -1  23   0   24.27    1.97 
   1  23   0   21.75    1.93 
  -1  23   0   22.73    2.31 
  -1  23   0   24.53    2.59 
  -1  23   0   24.04    2.28 
   1  23   0   21.27    2.11 
  -1  23   0   23.78    2.44 
   2 -23   0    8.87    1.43 
   2 -23   0    7.61    1.47 
   2 -23   0    8.29    0.92 
   2 -23   0    7.35    1.01 
   2 -23   0    5.84    0.99 
   2 -23   0    7.90    1.62 
   2 -23   0    7.44    1.51 
   2 -23   0    5.66    1.36 
   2 -23   0    6.69    1.12 
   2  23   0    5.45    1.32 
   2  23   0    7.25    1.21 
   2  23   0    6.59    0.70 
  -2  23   0    7.53    1.14 
  -2  23   0    7.17    1.05 
  -2  23   0    9.77    1.27 
   2  23   0    6.14    0.83 
  -2  23   0    7.77    1.96 
   2  23   0    7.25    1.34 
   2  23   0    7.52    1.19 
   2  23   0    6.37    1.18 
  -2  23   0    7.92    1.69 
   2  23   0    6.71    1.39 
   3 -23   0   -0.97    0.66 
   3 -23   0   -0.20    0.49 
   3 -23   0   -0.40    0.87 
   3 -23   0    0.16    0.94 
   3 -23   0    0.56    0.98 
   3 -23   0    0.17    0.64 
   3  23   0   -1.18    0.87 
   3  23   0   -0.49    0.59 
   3  23   0   -0.10    0.58 
  -3  23   0    0.14    1.08 
   3  23   0   -0.07    0.39 
   3  23   0    0.16    0.52 
   3  23   0    0.39    0.32 
   3  23   0   -0.50    0.54 
   3  23   0   -0.01    0.56 
   3  23   0   -0.40    0.80 
   4 -23   0    8.71    0.85 
   4 -23   0    8.49    1.01 
   4 -23   0    8.05    0.74 
   4 -23   0    8.36    1.28 
   4 -23   0    8.21    0.64 
   4  23   0    7.22    0.87 
   4  23   0    7.66    0.84 
   4  23   0    7.85    0.79 
   4  23   0    9.16    0.87 
   5 -23   0    4.77    0.46 
   5 -23   0    4.84    0.45 
   5  23   0    4.30    0.52 
   5  23   0    3.73    0.43 
   5  23   0    4.48    0.58 
   5  23   0    4.15    0.45 
   5  23   0    4.31    0.49 
   0 -24   0   23.59    2.36 
   0 -24   0   21.52    2.14 
   0 -24   0   24.38    1.81 
   0  24   0   30.97    2.23 
   0  24   0   23.29    2.32 
   0  24   0   24.70    2.03 
   0  24   0   22.34    1.95 
   0  24   0   23.70    2.52 
   0  24   0   24.73    2.24 
   0  24   0   21.88    2.14 
   0  24   0   25.05    2.07 
   1 -24   0   21.83    1.44 
   1 -24   0   18.68    1.30 
   1 -24   0   18.91    2.16 
   1 -24   0   19.71    1.84 
   1 -24   0   20.73    2.14 
   1 -24   0   18.51    1.70 
   1 -24   0   19.49    1.56 
   1 -24   0   20.06    2.05 
  -1  24   0   18.81    1.70 
   1  24   0   21.13    2.08 
  -1  24   0   22.11    2.02 
  -1  24   0   20.76    1.78 
   1  24   0   21.52    2.01 
   1  24   0   17.30    1.64 
  -1  24   0   18.56    1.56 
   1  24   0   21.67    2.11 
  -1  24   0   22.82    2.40 
  -1  24   0   19.55    2.10 
  -1  24   0   19.00    1.31 
   1  24   0   18.29    2.15 
  -1  24   0   17.02    1.58 
  -1  24   0   19.15    2.34 
   1  24   0   18.13    1.42 
   1  24   0   21.02    1.85 
   2 -24   0    5.18    1.05 
   2 -24   0    5.15    1.42 
   2 -24   0    6.98    1.42 
   2 -24   0    7.02    1.37 
   2 -24   0    5.51    0.92 
   2 -24   0    5.63    0.80 
   2 -24   0    6.03    0.78 
  -2  24   0    5.64    1.77 
   2  24   0    6.72    1.14 
   2  24   0    5.18    1.34 
  -2  24   0    4.48    1.57 
   2  24   0    4.67    0.70 
  -2  24   0    3.77    1.09 
  -2  24   0    5.36    0.75 
  -2  24   0    5.13    1.06 
   2  24   0    4.68    0.62 
   2  24   0    4.86    1.27 
   3 -24   0    4.06    1.14 
   3 -24   0    4.28    1.28 
   3 -24   0    4.82    0.85 
   3 -24   0    4.72    1.00 
   3 -24   0    4.89    0.72 
   3  24   0    5.51    0.84 
   3  24   0    4.73    0.82 
   3  24   0    4.53    1.18 
  -3  24   0    5.01    1.10 
  -3  24   0    7.79    1.56 
   3  24   0    5.37    0.50 
   3  24   0    5.00    0.64 
   3  24   0    5.70    0.82 
   3  24   0    4.74    0.84 
   4 -24   0    5.76    0.87 
   4 -24   0    5.01    1.02 
   4 -24   0    5.49    0.56 
   4 -24   0    4.95    0.65 
   4 -24   0    5.33    0.47 
   4  24   0    4.44    0.73 
   4  24   0    5.95    0.62 
   4  24   0    5.67    0.67 
   4  24   0    5.60    0.69 
   0 -25   0    0.46    1.24 
   0 -25   0    2.52    0.92 
   0 -25   0    0.76    0.41 
   0 -25   0    0.04    0.99 
   0  25   0    0.30    1.34 
   0  25   0   -0.60    1.20 
   0  25   0    1.51    0.81 
   0  25   0   -0.19    0.96 
   0  25   0    0.49    0.58 
   0  25   0    1.01    1.25 
   0  25   0    0.22    0.71 
   0  25   0    0.42    0.65 
   0  25   0    0.75    0.94 
   1 -25   0    8.49    2.15 
   1 -25   0    8.52    0.78 
   1 -25   0    9.12    1.25 
   1 -25   0    9.80    1.84 
   1 -25   0   10.15    1.64 
   1 -25   0    9.90    0.86 
   1 -25   0    9.12    1.04 
  -1 -25   0    9.22    1.11 
   1 -25   0    9.81    1.30 
  -1  25   0   10.08    1.56 
   1  25   0    9.34    1.68 
   1  25   0    9.22    0.88 
   1  25   0    5.46    1.21 
   1  25   0    7.83    1.98 
  -1  25   0    6.96    1.22 
  -1  25   0    8.39    0.70 
  -1  25   0    8.93    1.08 
  -1  25   0   11.41    1.72 
  -1  25   0    9.66    1.12 
  -1  25   0    8.68    1.73 
  -1  25   0   12.18    2.79 
   1  25   0    9.33    1.63 
   1  25   0    8.89    0.89 
  -1  25   0    8.34    1.95 
   2 -25   0    1.26    1.05 
   2 -25   0    0.00    0.39 
   2 -25   0    0.17    0.73 
   2 -25   0   -0.21    0.94 
   2 -25   0   -0.25    0.53 
   2  25   0   -1.50    1.00 
  -2  25   0   -0.39    0.70 
   2  25   0    0.33    0.47 
   2  25   0   -0.18    0.38 
  -2  25   0    0.52    0.37 
   2  25   0    2.21    0.88 
  -2  25   0   -0.22    1.06 
  -2  25   0    0.66    1.27 
  -2  25   0   -0.13    0.72 
   3 -25   0    0.74    0.63 
   3 -25   0    0.15    0.44 
   3 -25   0    1.10    0.86 
   3 -25   0   -0.01    0.60 
  -3  25   0    0.03    0.62 
  -3  25   0    1.96    1.45 
   3  25   0    0.46    0.27 
   3  25   0    0.15    0.35 
   3  25   0    0.53    0.47 
   3  25   0    0.16    0.57 
  -3  25   0    0.48    0.49 
   4 -25   0    2.10    0.81 
   4 -25   0    1.84    0.35 
   4 -25   0    2.18    0.72 
   4 -25   0    1.44    0.50 
   4  25   0    1.78    0.58 
   4  25   0    1.50    0.52 
   4  25   0    1.59    0.57 
   4  25   0    1.46    0.48 
   0 -26   0   73.39    4.74 
   0 -26   0   80.74    4.98 
   0 -26   0   75.07    4.61 
   0  26   0   83.33    4.88 
   0  26   0   71.59    4.80 
   0  26   0   72.58    4.70 
   0  26   0   73.66    4.71 
   0  26   0   76.22    5.25 
   1 -26   0    5.89    1.13 
   1 -26   0    4.75    0.56 
   1 -26   0    9.01    2.53 
   1 -26   0    5.46    0.81 
  -1 -26   0    4.43    0.70 
   1 -26   0    5.26    1.10 
   1 -26   0    4.93    1.41 
   1  26   0    4.83    0.62 
  -1  26   0    3.92    1.05 
   1  26   0    5.00    2.12 
  -1  26   0    4.13    0.91 
  -1  26   0    3.21    1.35 
  -1  26   0    3.71    0.87 
  -1  26   0    3.60    1.48 
  -1  26   0    3.75    0.43 
  -1  26   0    5.42    1.83 
   1  26   0    3.78    0.94 
   1  26   0    2.14    1.22 
   1  26   0    3.05    0.71 
   2 -26   0    0.25    0.90 
   2 -26   0    1.31    1.01 
   2 -26   0    0.50    0.23 
   2 -26   0    0.91    0.50 
   2 -26   0    1.02    0.71 
   2 -26   0    0.51    0.29 
  -2  26   0    1.73    1.18 
  -2  26   0    1.35    0.69 
  -2  26   0    0.24    0.72 
  -2  26   0    1.17    1.09 
  -2  26   0    0.90    0.35 
   2  26   0    0.20    0.84 
   2  26   0    0.66    0.45 
   2  26   0   -0.39    0.99 
   2  26   0    0.96    0.39 
   3 -26   0    3.22    0.87 
   3 -26   0    3.00    0.56 
   3 -26   0    2.96    1.11 
   3 -26   0    3.32    0.72 
  -3  26   0    3.66    0.51 
   3  26   0    2.63    0.67 
  -3  26   0    2.91    0.79 
   3  26   0    2.49    0.63 
   3  26   0    3.24    0.39 
   3  26   0    3.30    0.44 
   4 -26   0    4.01    0.48 
   4 -26   0    3.29    0.68 
  -4  26   0    3.57    0.43 
   4  26   0    3.53    0.55 
   4  26   0    3.47    0.48 
   4  26   0    3.46    0.51 
   4  26   0    3.12    0.49 
   0 -27   0    3.29    0.84 
   0  27   0    2.75    0.74 
   0  27   0   -0.41    1.26 
   0  27   0    0.59    0.84 
   0  27   0    3.07    0.73 
   0  27   0    1.12    0.71 
   1 -27   0    8.09    0.88 
  -1 -27   0    6.99    0.75 
   1 -27   0    7.78    1.38 
   1 -27   0    6.43    1.07 
   1  27   0    4.99    0.99 
  -1  27   0    6.70    1.65 
  -1  27   0    6.56    1.14 
   1  27   0    6.48    0.58 
  -1  27   0    8.18    1.48 
   1  27   0    6.17    1.45 
  -1  27   0    6.65    1.67 
  -1  27   0    7.86    1.89 
  -1  27   0    7.38    0.95 
  -1  27   0    6.45    0.97 
   2 -27   0    0.54    1.07 
   2 -27   0    0.19    0.83 
   2 -27   0    0.34    0.66 
   2 -27   0    0.11    0.38 
  -2 -27   0    0.55    0.57 
   2  27   0    0.59    0.46 
  -2  27   0    0.55    0.65 
  -2  27   0   -0.13    0.55 
  -2  27   0   -1.25    1.27 
   2  27   0    0.09    0.35 
  -2  27   0   -0.31    0.58 
  -2  27   0    1.80    1.20 
  -2  27   0    0.00    0.29 
   3 -27   0    1.64    0.62 
   3 -27   0    1.98    0.77 
   3 -27   0    0.88    0.72 
   3 -27   0    0.79    0.37 
   3  27   0    1.20    0.45 
  -3  27   0    1.67    0.41 
   3  27   0    1.46    0.57 
   3  27   0    1.78    0.35 
  -3  27   0    1.28    0.55 
   4 -27   0    0.84    0.39 
   4  27   0    0.77    0.33 
   0 -28   0   57.18    3.56 
   0 -28   0   55.27    3.58 
   0  28   0   56.05    3.67 
   0  28   0   58.45    3.53 
   0  28   0   55.20    4.01 
  -1 -28   0    2.22    0.54 
   1 -28   0    4.45    0.88 
  -1 -28   0    2.56    0.82 
   1 -28   0    2.63    0.67 
   1 -28   0    1.19    0.92 
   1 -28   0    2.62    0.87 
   1 -28   0    2.22    1.29 
  -1  28   0    1.57    0.60 
  -1  28   0    1.19    0.69 
  -1  28   0    2.53    0.73 
   1  28   0    0.85    1.57 
   1  28   0    1.89    0.73 
   2 -28   0    0.98    0.39 
   2 -28   0    1.14    0.61 
   2 -28   0    0.75    0.73 
  -2 -28   0    1.12    0.43 
   2 -28   0    0.22    0.61 
  -2  28   0    0.22    0.55 
  -2  28   0    0.54    0.55 
   2  28   0    0.64    0.40 
  -2  28   0    0.55    0.57 
   2  28   0    1.08    0.33 
  -2  28   0    1.12    0.24 
   3 -28   0    3.99    1.16 
   3 -28   0    4.49    0.61 
   3 -28   0    4.10    0.48 
   3 -28   0    3.49    0.70 
  -3 -28   0    4.53    0.66 
  -3  28   0    4.16    0.39 
   3  28   0    2.83    0.56 
   3  28   0    3.36    0.58 
  -3  28   0    4.23    0.65 
   0 -29   0   -0.17    0.33 
   0 -29   0    0.88    0.54 
   0  29   0    0.42    0.45 
   0  29   0   -0.04    0.58 
   0  29   0    0.33    0.46 
   1 -29   0    0.04    1.21 
  -1 -29   0    2.80    0.78 
   1 -29   0    2.19    0.59 
   1 -29   0    2.87    0.80 
   1 -29   0    1.13    0.50 
   1 -29   0    2.67    0.85 
  -1 -29   0    1.58    0.43 
  -1  29   0    2.20    0.64 
   1  29   0    3.33    0.62 
  -1  29   0    3.25    0.68 
  -1  29   0    1.44    0.63 
   2 -29   0    4.70    0.77 
   2 -29   0    4.95    0.84 
   2 -29   0    4.87    0.61 
  -2 -29   0    5.67    0.61 
   2 -29   0    3.37    1.00 
  -2  29   0    4.65    0.73 
  -2  29   0    4.56    0.68 
   2  29   0    5.26    0.56 
   2  29   0    5.03    0.46 
   3 -29   0    1.95    0.52 
   3 -29   0    1.55    0.33 
   3 -29   0    1.37    0.54 
  -3 -29   0    1.64    0.43 
  -3  29   0    1.86    0.53 
  -3  29   0    1.30    0.50 
   3  29   0    1.03    0.33 
   0 -30   0    7.85    0.84 
   0  30   0    6.78    0.67 
   0  30   0    6.86    0.68 
   1 -30   0    3.94    0.56 
  -1 -30   0    3.26    0.95 
   1 -30   0    3.94    0.57 
  -1 -30   0    5.00    0.73 
   1 -30   0    4.69    0.78 
   1 -30   0    4.42    0.74 
  -1  30   0    3.58    0.59 
  -1  30   0    4.04    0.63 
   1  30   0    4.25    0.58 
   2 -30   0    4.68    0.55 
  -2 -30   0    5.17    0.49 
   2 -30   0    4.71    0.73 
   2 -30   0    5.03    0.68 
  -2  30   0    5.12    0.64 
   2  30   0    5.27    0.42 
  -2  30   0    3.95    0.62 
   2  30   0    5.37    0.49 
   0 -31   0    0.28    0.40 
  -1 -31   0    3.92    0.63 
   1 -31   0    3.85    0.73 
   1 -31   0    4.69    0.70 
  -1 -31   0    3.74    0.50 
   1 -31   0    4.08    0.58 
  -1  31   0    4.33    0.55 
   1  31   0    4.06    0.50 
  -1  31   0    4.24    0.68 
  -1  31   0    3.01    0.65 
   1  31   0    4.12    0.44 
   2 -31   0    2.86    0.56 
   2 -31   0    3.07    0.51 
   2 -31   0    3.63    0.48 
   2  31   0    2.97    0.34 
   2  31   0    3.93    0.33 
  -2  31   0    3.80    0.51 
  -2  31   0    3.33    0.50 
   0 -32   0    5.01    0.61 
   0 -32   0    5.07    0.56 
  -1 -32   0    0.81    0.36 
   1 -32   0    0.86    0.58 
  -1  32   0    0.44    0.39 
   1  32   0    0.34    0.31 
   1  32   0    0.72    0.31 
   7   0  -1    0.96    0.64 
   7   0  -1    1.33    0.86 
   6   0  -1    4.63    1.25 
   6   0  -1    4.75    0.98 
   6   0  -1    6.59    1.42 
   5   0  -1   35.38    2.55 
   5   0  -1   33.26    2.11 
  -5   0   1   32.37    2.34 
   5   0  -1   35.49    2.63 
  -4   0   1    2.55    0.59 
   4   0  -1    2.95    0.81 
   4   0  -1    1.71    1.09 
   3   0  -1   28.82    2.27 
  -3   0   1   29.78    2.10 
  -3   0   1   31.10    1.94 
  -3   0   1   33.06    2.07 
   3   0  -1   29.90    2.04 
   3   0  -1   27.83    2.00 
   2   0  -1   98.53    5.97 
  -2   0   1   94.91    5.88 
   2   0  -1   94.43    5.90 
  -2   0   1   97.04    5.96 
   2   0  -1   99.85    5.95 
  -2   0   1  100.23    5.96 
   2   0  -1  104.29    5.97 
   2   0  -1   94.01    5.93 
  -2   0   1   94.09    5.97 
  -2   0   1   96.88    5.94 
   2   0  -1   90.31    6.01 
  -2   0   1  100.02    5.90 
  -1   0   1    6.24    0.58 
   1   0  -1    7.07    0.52 
  -1   0   1    6.26    0.49 
  -1   0   1    7.03    0.53 
   1   0  -1    6.61    0.50 
  -1   0   1    6.31    0.52 
   1   0  -1    6.22    0.52 
  -1   0   1    6.60    0.60 
   1   0  -1    6.68    0.49 
  -1   0   1    6.57    0.52 
  -1   0   1    6.40    0.49 
   1   0  -1    6.46    0.51 
   1   0  -1    7.24    0.66 
  -1   0   1    7.01    0.49 
   1   0  -1    6.72    0.62 
  -1   0   1    6.68    0.49 
   1   0  -1    6.96    0.47 
   1   0  -1    6.25    0.51 
   1   0  -1    7.01    0.47 
   1   0  -1    6.48    0.51 
  -1   0   1    5.61    0.59 
   1   0  -1    7.09    0.47 
   1   0  -1    5.73    0.57 
   1   0  -1    6.31    0.72 
  -1   0   1    6.04    0.60 
   1   0  -1    7.07    0.51 
   0   0   1   38.81    2.46 
   0   0  -1   40.90    2.44 
   0   0   1   37.61    2.46 
   0   0   1   41.30    2.44 
   0   0  -1   40.86    2.44 
   0   0   1   41.66    2.44 
   0   0   1   41.93    2.45 
   0   0  -1   38.47    2.44 
   0   0  -1   40.00    2.48 
   0   0  -1   38.13    2.44 
   0   0   1   41.69    2.45 
   0   0   1   42.94    2.44 
   0   0   1   38.79    2.44 
   0   0   1   40.98    2.44 
   0   0  -1   39.15    2.44 
   0   0  -1   41.72    2.45 
   0   0  -1   39.55    2.46 
   0   0  -1   40.69    2.46 
   0   0   1   39.26    2.46 
   0   0   1   42.18    2.44 
   0   0  -1   41.54    2.44 
   0   0   1   40.23    2.47 
   0   0  -1   41.26    2.44 
   2   0   1   64.57    4.08 
   3   0   1   37.15    2.63 
  -4   0  -1    3.70    0.72 
   4   0   1    2.81    1.11 
  -4   0  -1    3.38    0.43 
  -5   0  -1   22.24    1.53 
   5   0   1   21.99    2.19 
   6   0   1    3.77    0.41 
   6   0   1    6.21    1.44 
   6   0   1    3.19    0.45 
   6   0   1    4.74    1.07 
   6   0   1    7.33    1.46 
   7  -1  -1    4.12    1.13 
   7  -1  -1    3.83    0.78 
   7   1  -1    4.61    1.21 
   7   1  -1    4.81    0.82 
   6  -1  -1   18.68    1.56 
   6  -1  -1   19.07    1.90 
   6  -1  -1   20.10    1.82 
   6   1  -1   15.13    1.86 
   6   1  -1   21.73    1.62 
   6   1  -1   21.33    1.70 
  -5  -1   1   12.53    1.12 
   5  -1  -1   11.90    1.38 
   5  -1  -1   11.55    0.82 
   5  -1  -1   11.06    1.54 
   5   1  -1   11.96    0.82 
   5   1  -1   11.33    1.42 
   5   1  -1   12.02    1.31 
  -5   1   1   13.98    1.11 
  -4  -1   1   13.74    1.09 
   4  -1  -1   11.12    1.20 
   4  -1  -1   13.30    1.65 
  -4   1   1   14.54    1.08 
   4   1  -1   14.05    1.25 
   4   1  -1   12.38    1.57 
  -3  -1   1   42.17    2.67 
   3  -1  -1   38.29    2.61 
  -3  -1   1   42.88    2.63 
  -3  -1   1   41.56    2.66 
  -3  -1   1   39.08    2.52 
   3  -1  -1   38.31    2.59 
   3  -1  -1   38.71    2.82 
  -3   1   1   38.46    2.67 
  -3   1   1   39.71    2.67 
   3   1  -1   37.58    2.57 
   3   1  -1   41.43    2.83 
   3   1  -1   43.01    2.63 
  -3   1   1   38.95    2.52 
  -2  -1   1   82.25    4.89 
   2  -1  -1   76.32    4.95 
   2  -1  -1   76.25    4.88 
   2  -1  -1   79.33    4.85 
   2  -1  -1   80.63    4.92 
  -2  -1   1   81.11    4.89 
  -2  -1   1   76.48    4.91 
  -2  -1   1   81.27    4.88 
   2  -1  -1   85.23    4.92 
  -2  -1   1   72.63    4.84 
  -2  -1   1   81.45    4.82 
  -2  -1   1   77.88    4.84 
   2  -1  -1   87.13    4.90 
   2   1  -1   76.40    4.89 
  -2   1   1   85.00    4.90 
  -2   1   1   81.57    4.88 
   2   1  -1   80.71    4.90 
   2   1  -1   73.44    4.90 
   2   1  -1   84.89    4.89 
  -2   1   1   77.40    4.92 
   2   1  -1   77.01    4.87 
   2   1  -1   74.50    4.97 
   2   1  -1   78.44    4.84 
  -2   1   1   80.66    4.82 
  -2   1   1   74.42    4.83 
  -1  -1   1   88.87    5.39 
  -1  -1   1   93.91    5.40 
   1  -1  -1   88.94    5.40 
   1  -1  -1   88.55    5.40 
  -1  -1   1   85.57    5.40 
   1  -1  -1   91.01    5.45 
   1  -1  -1   87.52    5.39 
   1  -1  -1   89.37    5.39 
   1  -1  -1  101.13    5.50 
   1  -1  -1   83.72    5.39 
   1  -1  -1   92.68    5.47 
   1  -1  -1   91.96    5.39 
   1  -1  -1   85.46    5.44 
  -1  -1   1   90.32    5.39 
  -1  -1   1   91.24    5.39 
  -1  -1   1   87.74    5.44 
  -1  -1   1   86.93    5.40 
   1  -1  -1   92.62    5.39 
   1  -1  -1   87.91    5.40 
   1  -1  -1   91.02    5.39 
   1  -1  -1   83.55    5.44 
  -1  -1   1   89.12    5.44 
  -1  -1   1   89.04    5.39 
   1  -1  -1   84.95    5.40 
   1  -1  -1   85.05    5.48 
  -1  -1   1   86.20    5.44 
  -1  -1   1   90.49    5.43 
   1   1  -1   86.53    5.39 
  -1   1   1   90.37    5.41 
   1   1  -1   92.07    5.38 
  -1   1   1   88.45    5.39 
   1   1  -1   94.32    5.39 
   1   1  -1   94.78    5.44 
   1   1  -1   91.20    5.39 
   1   1  -1   86.10    5.43 
   1   1  -1   88.61    5.39 
   1   1  -1   89.74    5.40 
   1   1  -1   88.72    5.38 
   1   1  -1   93.45    5.39 
  -1   1   1   88.30    5.39 
  -1   1   1   89.32    5.39 
   1   1  -1   90.21    5.42 
   1   1  -1   93.61    5.47 
   1   1  -1   91.23    5.39 
   1   1  -1   88.13    5.39 
   1   1  -1   84.47    5.39 
  -1   1   1   88.52    5.41 
  -1   1   1   91.95    5.44 
  -1   1   1   88.87    5.44 
   1   1  -1   84.55    5.48 
  -1   1   1   89.56    5.39 
  -1   1   1   88.81    5.43 
  -1   1   1   94.09    5.40 
   0  -1  -1   46.65    2.77 
   0  -1  -1   44.32    2.78 
   0  -1   1   45.89    2.77 
   0  -1  -1   44.14    2.79 
   0  -1   1   46.04    2.78 
   0  -1  -1   48.02    2.78 
   0  -1  -1   45.92    2.81 
   0  -1  -1   45.32    2.77 
   0  -1   1   47.49    2.77 
   0  -1  -1   47.63    2.77 
   0  -1  -1   43.80    2.77 
   0  -1   1   42.80    2.79 
   0  -1   1   49.96    2.79 
   0  -1   1   47.96    2.77 
   0  -1   1   47.22    2.77 
   0  -1  -1   44.99    2.77 
   0  -1   1   44.54    2.77 
   0  -1   1   44.49    2.77 
   0  -1   1   45.08    2.79 
   0  -1  -1   45.36    2.77 
   0  -1   1   48.66    2.79 
   0  -1   1   48.73    2.78 
   0  -1  -1   46.00    2.80 
   0  -1   1   44.63    2.80 
   0   1  -1   46.96    2.82 
   0   1  -1   49.65    2.77 
   0   1  -1   45.47    2.79 
   0   1  -1   47.46    2.77 
   0   1   1   43.91    2.80 
   0   1   1   46.57    2.79 
   0   1   1   49.44    2.77 
   0   1  -1   44.31    2.78 
   0   1  -1   47.37    2.77 
   0   1   1   46.59    2.77 
   0   1  -1   46.09    2.79 
   0   1   1   46.64    2.78 
   0   1  -1   47.02    2.77 
   0   1   1   46.27    2.77 
   0   1   1   46.11    2.80 
   0   1   1   45.14    2.78 
   0   1   1   42.36    2.77 
   0   1  -1   43.10    2.77 
   0   1  -1   44.38    2.77 
   0   1   1   46.38    2.77 
   0   1  -1   45.41    2.78 
   0   1   1   42.57    2.79 
   0   1   1   42.69    2.78 
   0   1   1   46.24    2.77 
   1  -1   1  136.38    7.95 
   1  -1   1  128.82    7.94 
  -1   1  -1  131.47    7.93 
   2  -1   1   79.77    5.09 
   2   1   1   83.99    5.11 
   3  -1   1   28.52    2.15 
   3   1   1   29.29    2.17 
  -4  -1  -1    9.28    0.70 
   4  -1   1    9.33    1.39 
   4   1   1    8.82    1.40 
  -4   1  -1    8.63    0.71 
  -5  -1  -1   18.45    1.33 
   5  -1   1   19.01    1.64 
  -5   1  -1   17.75    1.34 
   6  -1   1   18.06    1.60 
   6  -1   1   19.73    2.00 
   6  -1   1   17.82    1.15 
   6  -1   1   21.72    2.22 
   6  -1   1   18.13    1.87 
   6   1   1   18.03    1.63 
   6   1   1   16.15    1.87 
   6   1   1   17.51    1.16 
   6   1   1   17.93    1.18 
   6   1   1   19.15    1.90 
   7  -2  -1    1.17    0.61 
   7  -2  -1    1.20    0.85 
   7   2  -1    2.04    1.06 
   7   2  -1    0.97    0.66 
   6  -2  -1    8.38    1.40 
   6  -2  -1    9.78    1.39 
   6  -2  -1   10.14    1.11 
   6   2  -1    9.81    1.22 
   6   2  -1   10.78    1.27 
   6   2  -1   10.40    1.57 
   5  -2  -1   11.27    0.77 
  -5  -2   1   10.61    1.05 
   5  -2  -1   12.01    1.33 
   5  -2  -1    9.39    1.47 
   5   2  -1   10.82    1.48 
   5   2  -1   10.00    0.75 
   5   2  -1   10.29    1.13 
  -5   2   1   11.32    1.08 
   4  -2  -1    6.62    1.33 
  -4  -2   1    7.58    0.81 
   4  -2  -1    6.23    0.93 
   4   2  -1    7.81    1.36 
   4   2  -1    6.67    0.94 
  -4   2   1    8.76    0.81 
  -3  -2   1   73.98    4.49 
  -3  -2   1   73.01    4.52 
  -3  -2   1   75.23    4.50 
   3  -2  -1   70.03    4.63 
   3  -2  -1   73.36    4.48 
   3  -2  -1   67.74    4.47 
  -3  -2   1   69.55    4.37 
  -3   2   1   70.20    4.38 
   3   2  -1   72.95    4.65 
  -3   2   1   68.88    4.50 
  -3   2   1   69.66    4.52 
   3   2  -1   72.99    4.49 
   3   2  -1   69.31    4.44 
   2  -2  -1   61.87    3.95 
  -2  -2   1   62.13    3.97 
   2  -2  -1   65.61    3.99 
  -2  -2   1   65.08    3.88 
  -2  -2   1   56.96    3.87 
  -2  -2   1   64.03    3.95 
  -2  -2   1   63.48    3.96 
   2  -2  -1   63.59    4.03 
   2  -2  -1   62.72    4.01 
  -2  -2   1   62.10    3.95 
  -2   2   1   67.72    3.94 
   2   2  -1   64.54    3.98 
  -2   2   1   62.75    3.87 
   2   2  -1   63.51    3.90 
  -2   2   1   67.86    3.89 
   2   2  -1   60.63    4.03 
   2   2  -1   69.45    3.98 
  -2   2   1   66.17    3.96 
   2   2  -1   58.70    3.92 
   2   2  -1   57.44    3.97 
   2   2  -1   66.98    3.96 
  -2   2   1   62.69    4.00 
   1  -2  -1  264.17   16.38 
   1  -2  -1  275.00   16.39 
  -1  -2   1  276.36   16.38 
   1  -2  -1  263.04   16.39 
   1  -2  -1  265.03   16.48 
   1  -2  -1  267.82   16.40 
   1  -2  -1  272.47   16.38 
   1  -2  -1  278.08   16.46 
  -1  -2   1  264.05   16.42 
  -1  -2   1  279.82   16.39 
  -1  -2   1  266.19   16.44 
   1  -2  -1  273.67   16.43 
   1  -2  -1  275.33   16.38 
   1  -2  -1  265.39   16.39 
   1  -2  -1  255.75   16.37 
   1  -2  -1  288.73   16.44 
  -1  -2   1  273.99   16.38 
   1  -2  -1  288.01   16.38 
  -1  -2   1  260.92   16.39 
  -1  -2   1  269.21   16.38 
  -1  -2   1  259.84   16.43 
   1  -2  -1  239.01   16.38 
  -1  -2   1  268.68   16.43 
   1  -2  -1  271.99   16.43 
   1  -2  -1  248.17   16.40 
  -1  -2   1  274.67   16.40 
   1  -2  -1  252.91   16.43 
   1  -2  -1  267.21   16.39 
   1  -2  -1  273.86   16.39 
  -1  -2   1  279.50   16.38 
   1   2  -1  270.01   16.39 
   1   2  -1  284.63   16.39 
   1   2  -1  288.88   16.46 
  -1   2   1  276.08   16.41 
  -1   2   1  276.99   16.43 
  -1   2   1  288.13   16.40 
  -1   2   1  283.88   16.39 
   1   2  -1  270.92   16.47 
   1   2  -1  268.84   16.37 
   1   2  -1  282.85   16.44 
   1   2  -1  276.31   16.38 
   1   2  -1  279.52   16.38 
   1   2  -1  303.22   16.39 
   1   2  -1  265.85   16.42 
  -1   2   1  283.87   16.38 
   1   2  -1  242.83   16.43 
   1   2  -1  288.84   16.39 
  -1   2   1  278.60   16.39 
   1   2  -1  258.15   16.38 
  -1   2   1  269.76   16.38 
  -1   2   1  287.54   16.43 
  -1   2   1  282.22   16.38 
   1   2  -1  290.19   16.42 
   1   2  -1  282.84   16.38 
  -1   2   1  279.82   16.44 
   1   2  -1  276.83   16.38 
   0  -2  -1   24.09    1.53 
   0  -2   1   24.64    1.57 
   0  -2  -1   22.90    1.57 
   0  -2   1   25.06    1.52 
   0  -2  -1   22.68    1.53 
   0  -2  -1   23.81    1.51 
   0  -2  -1   25.61    1.52 
   0  -2   1   24.43    1.51 
   0  -2   1   24.70    1.52 
   0  -2   1   23.89    1.56 
   0  -2   1   23.94    1.55 
   0  -2  -1   24.02    1.53 
   0  -2  -1   25.10    1.52 
   0  -2   1   23.93    1.51 
   0  -2  -1   24.95    1.58 
   0  -2   1   23.45    1.52 
   0  -2   1   23.15    1.52 
   0  -2   1   23.81    1.52 
   0  -2  -1   24.36    1.52 
   0  -2   1   25.28    1.51 
   0  -2   1   23.98    1.55 
   0  -2   1   23.79    1.53 
   0  -2  -1   24.72    1.51 
   0  -2  -1   23.92    1.55 
   0   2  -1   25.24    1.53 
   0   2  -1   24.35    1.52 
   0   2   1   26.43    1.51 
   0   2   1   25.37    1.53 
   0   2  -1   23.95    1.55 
   0   2   1   23.79    1.55 
   0   2   1   27.32    1.52 
   0   2   1   25.26    1.51 
   0   2  -1   26.07    1.51 
   0   2   1   24.93    1.53 
   0   2  -1   25.03    1.53 
   0   2   1   25.08    1.51 
   0   2   1   23.98    1.53 
   0   2   1   26.88    1.53 
   0   2  -1   27.09    1.53 
   0   2  -1   25.03    1.55 
   0   2  -1   24.54    1.53 
   0   2   1   25.45    1.56 
   0   2  -1   26.53    1.58 
   0   2   1   24.00    1.53 
   0   2   1   25.08    1.55 
   0   2  -1   27.41    1.52 
   0   2  -1   25.88    1.52 
   0   2  -1   23.10    1.66 
   1  -2   1  210.36   12.12 
   1  -2   1  212.09   12.17 
  -1  -2  -1  216.35   12.12 
   1  -2   1  199.59   12.12 
   1  -2   1  210.42   12.16 
  -1   2  -1  198.40   12.13 
   1   2   1  213.07   12.14 
  -1   2  -1  196.49   12.16 
  -1   2  -1  186.35   12.15 
   1   2   1  205.45   12.13 
  -1   2  -1  197.74   12.13 
  -1   2  -1  200.99   12.13 
  -1   2  -1  196.15   12.15 
   1   2   1  205.44   12.15 
  -1   2  -1  186.10   12.16 
   2  -2   1   71.94    4.21 
   2  -2   1   75.10    4.20 
   2  -2   1   68.43    4.33 
   2   2   1   63.75    4.33 
  -2   2  -1   68.32    4.19 
  -2   2  -1   66.35    4.35 
  -2   2  -1   67.96    4.21 
   3  -2   1   47.19    3.14 
   3   2   1   45.77    3.16 
  -4  -2  -1   13.98    0.92 
   4  -2   1   13.50    1.14 
   4  -2   1   12.88    1.46 
   4   2   1   12.19    1.49 
  -4   2  -1   11.32    0.91 
  -5  -2  -1   10.03    0.93 
   5  -2   1   11.55    1.63 
   5  -2   1   10.34    0.70 
   5  -2   1   10.59    0.71 
  -5   2  -1   11.40    0.95 
   5   2   1   13.47    1.54 
   6  -2   1   14.60    1.76 
   6  -2   1   19.41    1.95 
   6  -2   1   15.20    1.00 
   6  -2   1   14.33    1.42 
   6  -2   1   14.18    1.72 
   6   2   1   16.11    1.74 
   6   2   1   14.04    1.01 
   6   2   1   18.70    1.83 
   6   2   1   15.76    1.01 
   6   2   1   14.93    1.54 
   7  -3  -1    4.10    1.19 
   7   3  -1    3.61    1.24 
   7   3  -1    2.90    0.79 
   6  -3  -1   18.27    1.19 
   6  -3  -1   18.15    1.70 
   6  -3  -1   13.21    1.64 
   6  -3  -1   20.23    1.11 
   6  -3  -1   16.77    1.43 
   6   3  -1   17.52    1.54 
   6   3  -1   13.90    1.61 
   6   3  -1   19.06    1.84 
   5  -3  -1   19.57    1.85 
  -5  -3   1   14.89    1.33 
   5  -3  -1   16.37    1.61 
  -5   3   1   17.57    1.33 
   5   3  -1   15.60    1.06 
   5   3  -1   12.81    1.39 
   4  -3  -1   14.41    1.79 
   4  -3  -1   15.78    1.49 
  -4  -3   1   17.78    1.30 
   4   3  -1   15.68    1.71 
   4   3  -1   17.77    1.80 
   4   3  -1   16.79    1.38 
  -4   3   1   18.03    1.28 
  -3  -3   1   21.64    1.64 
  -3  -3   1   21.78    1.62 
   3  -3  -1   21.78    1.83 
  -3  -3   1   18.80    1.56 
   3  -3  -1   21.27    1.62 
   3  -3  -1   22.29    1.62 
  -3  -3   1   21.81    1.51 
   3   3  -1   22.06    1.56 
  -3   3   1   23.74    1.66 
   3   3  -1   24.07    1.87 
   3   3  -1   22.18    1.61 
  -3   3   1   24.07    1.50 
  -3   3   1   24.32    1.65 
  -2  -3   1   67.65    4.16 
   2  -3  -1   71.84    4.33 
   2  -3  -1   69.49    4.28 
   2  -3  -1   65.27    4.31 
  -2  -3   1   69.42    4.24 
   2  -3  -1   72.76    4.26 
  -2  -3   1   68.39    4.24 
  -2  -3   1   70.55    4.16 
  -2  -3   1   70.78    4.26 
   2   3  -1   65.69    4.25 
  -2   3   1   68.21    4.16 
  -2   3   1   63.66    4.33 
   2   3  -1   64.51    4.28 
   2   3  -1   65.90    4.26 
  -2   3   1   70.62    4.18 
   2   3  -1   68.08    4.33 
  -2   3   1   67.58    4.24 
   2   3  -1   67.98    4.23 
  -2   3   1   66.80    4.33 
   2   3  -1   68.27    4.19 
  -2   3   1   68.41    4.26 
   1  -3  -1  101.17    6.09 
   1  -3  -1  107.42    6.19 
  -1  -3   1  103.83    6.14 
   1  -3  -1  100.29    6.15 
  -1  -3   1  102.71    6.08 
   1  -3  -1   96.96    6.21 
   1  -3  -1  102.23    6.09 
  -1  -3   1  101.08    6.09 
   1  -3  -1  103.32    6.10 
   1  -3  -1  103.54    6.10 
   1  -3  -1   95.56    6.15 
  -1  -3   1  100.17    6.10 
   1  -3  -1   94.46    6.10 
   1  -3  -1  108.84    6.10 
   1  -3  -1  100.01    6.11 
   1  -3  -1  105.16    6.11 
   1  -3  -1  102.48    6.09 
  -1  -3   1  100.03    6.15 
   1  -3  -1  103.64    6.15 
  -1  -3   1  103.89    6.10 
   1  -3  -1  102.84    6.09 
  -1  -3   1   94.51    6.15 
  -1  -3   1  102.22    6.16 
   1  -3  -1  100.12    6.10 
   1  -3  -1   99.51    6.14 
  -1  -3   1  108.17    6.09 
   1  -3  -1   99.14    6.09 
  -1  -3   1   99.73    6.08 
  -1   3   1  100.16    6.12 
   1   3  -1  107.35    6.18 
   1   3  -1  101.96    6.09 
  -1   3   1   99.38    6.09 
  -1   3   1  100.31    6.09 
   1   3  -1  102.06    6.08 
  -1   3   1   96.08    6.11 
   1   3  -1   96.81    6.09 
  -1   3   1  101.25    6.10 
   1   3  -1  100.85    6.09 
  -1   3   1   99.19    6.14 
   1   3  -1  104.16    6.07 
  -1   3   1  106.03    6.12 
   1   3  -1   98.43    6.14 
   1   3  -1  103.29    6.08 
   1   3  -1   98.07    6.09 
   1   3  -1   99.36    6.20 
  -1   3   1   98.39    6.14 
  -1   3   1   96.88    6.15 
   1   3  -1   96.73    6.09 
  -1   3   1   98.28    6.09 
   1   3  -1  103.12    6.13 
   1   3  -1   95.90    6.09 
   1   3  -1   98.99    6.13 
   1   3  -1  100.73    6.10 
   1   3  -1  101.58    6.15 
   0  -3  -1   35.74    2.28 
   0  -3  -1   35.88    2.29 
   0  -3  -1   35.27    2.31 
   0  -3  -1   38.82    2.27 
   0  -3  -1   37.32    2.34 
   0  -3   1   39.24    2.27 
   0  -3   1   36.78    2.33 
   0  -3   1   38.77    2.28 
   0  -3  -1   38.92    2.27 
   0  -3  -1   36.22    2.33 
   0  -3   1   38.47    2.27 
   0  -3  -1   40.41    2.27 
   0  -3   1   36.48    2.27 
   0  -3   1   37.65    2.28 
   0  -3   1   37.90    2.31 
   0  -3  -1   37.70    2.29 
   0  -3  -1   37.91    2.28 
   0  -3   1   35.76    2.28 
   0  -3   1   38.34    2.29 
   0  -3   1   37.17    2.27 
   0  -3   1   35.01    2.28 
   0  -3   1   37.42    2.31 
   0  -3   1   36.43    2.32 
   0  -3  -1   37.46    2.27 
   0  -3   1   39.06    2.27 
   0  -3  -1   37.76    2.33 
   0   3   1   34.67    2.28 
   0   3   1   33.39    2.28 
   0   3   1   38.15    2.28 
   0   3  -1   38.93    2.27 
   0   3  -1   36.37    2.29 
   0   3  -1   35.99    2.27 
   0   3   1   37.19    2.30 
   0   3  -1   36.94    2.27 
   0   3   1   38.64    2.32 
   0   3   1   37.61    2.27 
   0   3  -1   33.03    2.29 
   0   3  -1   36.74    2.28 
   0   3  -1   38.12    2.32 
   0   3  -1   37.98    2.27 
   0   3  -1   37.59    2.28 
   0   3  -1   39.60    2.38 
   0   3  -1   35.58    2.33 
   0   3  -1   34.46    2.28 
   0   3   1   40.40    2.28 
   0   3   1   37.17    2.27 
   0   3   1   37.50    2.27 
   0   3   1   36.90    2.28 
   0   3   1   36.17    2.32 
   0   3  -1   37.12    2.31 
   0   3  -1   38.66    2.35 
   1  -3   1  154.15    9.01 
  -1  -3  -1  148.39    8.94 
  -1  -3  -1  150.95    8.94 
   1  -3   1  146.19    8.99 
  -1  -3  -1  129.81    8.96 
   1  -3   1  146.85    8.94 
   1  -3   1  148.49    8.98 
   1  -3   1  140.74    9.01 
   1  -3   1  149.48    8.95 
  -1  -3  -1  147.74    8.97 
  -1  -3  -1  141.93    8.97 
  -1  -3  -1  148.88    8.94 
  -1  -3  -1  148.22    8.94 
  -1   3  -1  146.33    9.00 
  -1   3  -1  136.48    8.98 
  -1   3  -1  155.42    8.95 
  -1   3  -1  156.63    9.00 
   1   3   1  158.14    8.99 
  -1   3  -1  141.04    8.99 
   1   3   1  154.51    8.97 
  -1   3  -1  160.54    8.97 
   1   3   1  154.65    8.97 
   1   3   1  154.52    8.98 
  -1   3  -1  148.12    8.95 
  -1   3  -1  153.77    8.96 
  -1   3  -1  153.24    8.95 
   2  -3   1  101.82    5.77 
   2  -3   1   91.68    5.86 
   2  -3   1   97.72    5.79 
  -2   3  -1   94.92    5.73 
  -2   3  -1   97.31    5.73 
  -2   3  -1   92.08    5.92 
   2   3   1   85.89    5.87 
   2   3   1   94.25    5.73 
   2   3   1   98.53    5.74 
  -2   3  -1   96.36    5.79 
   2   3   1   93.25    5.97 
  -2   3  -1   92.95    5.76 
   3  -3   1   17.63    1.20 
   3  -3   1   18.23    1.56 
   3   3   1   16.99    1.69 
  -3   3  -1   17.79    1.34 
  -3   3  -1   14.71    1.30 
   3   3   1   17.42    1.57 
  -3   3  -1   18.40    1.11 
   4  -3   1   19.17    1.83 
   4  -3   1   16.09    1.28 
  -4  -3  -1   15.15    1.10 
   4   3   1   16.30    1.32 
  -4   3  -1   15.97    1.15 
   4   3   1   17.16    1.72 
   5  -3   1   25.54    2.29 
   5  -3   1   25.15    1.50 
   5  -3   1   24.42    1.50 
  -5   3  -1   24.67    1.71 
   5   3   1   20.97    2.23 
   6  -3   1   15.61    1.78 
   6  -3   1   13.36    1.80 
   6  -3   1   24.07    2.23 
   6  -3   1   16.91    1.15 
   6   3   1   19.14    1.96 
   6   3   1   19.61    1.68 
   6   3   1   18.51    1.15 
   6   3   1   18.09    1.14 
   7  -4  -1    4.19    1.02 
   7  -4  -1    6.13    1.05 
   7   4  -1    5.84    0.84 
   7   4  -1    7.50    1.35 
   6  -4  -1    8.48    1.34 
   6  -4  -1    9.46    0.65 
   6  -4  -1    9.12    0.74 
   6  -4  -1    7.07    1.21 
   6  -4  -1   10.94    1.45 
   6   4  -1   10.99    1.28 
   6   4  -1    9.98    1.65 
   5  -4  -1   10.61    1.41 
   5  -4  -1   11.68    1.52 
  -5  -4   1   12.41    1.15 
   5  -4  -1   14.36    1.69 
   5   4  -1   12.37    0.86 
  -5   4   1   11.78    1.15 
   5   4  -1   10.53    1.21 
   4  -4  -1   12.21    1.60 
  -4  -4   1   13.63    1.14 
   4  -4  -1   12.52    1.38 
  -4  -4   1   15.09    1.73 
   4   4  -1   12.95    1.64 
   4   4  -1   13.83    1.26 
  -4   4   1   15.00    1.11 
   4   4  -1   11.66    1.27 
   3  -4  -1   50.53    3.29 
  -3  -4   1   54.01    3.40 
   3  -4  -1   52.74    3.37 
   3  -4  -1   54.22    3.50 
  -3  -4   1   54.27    3.41 
  -3  -4   1   52.46    3.42 
   3  -4  -1   50.27    3.36 
  -3  -4   1   51.85    3.26 
  -3   4   1   43.03    3.38 
   3   4  -1   52.50    3.52 
  -3   4   1   58.55    3.40 
  -3   4   1   54.64    3.41 
  -3   4   1   52.48    3.26 
   3   4  -1   51.49    3.36 
   3   4  -1   49.93    3.32 
  -2  -4   1  231.98   13.15 
  -2  -4   1  210.84   13.06 
  -2  -4   1  227.42   13.15 
   2  -4  -1  222.21   13.15 
  -2  -4   1  208.36   13.06 
   2  -4  -1  231.15   13.21 
   2  -4  -1  241.39   13.21 
  -2  -4   1  220.71   13.16 
   2  -4  -1  209.20   13.18 
   2   4  -1  225.14   13.14 
   2   4  -1  216.33   13.15 
  -2   4   1  200.62   13.06 
   2   4  -1  211.67   13.09 
   2   4  -1  207.44   13.18 
   2   4  -1  209.32   13.15 
  -2   4   1  213.32   13.13 
   2   4  -1  210.86   13.18 
  -2   4   1  219.37   13.16 
  -2   4   1  215.97   13.08 
  -2   4   1  206.93   13.22 
   1  -4  -1  143.49    8.40 
   1  -4  -1  145.54    8.39 
   1  -4  -1  140.64    8.40 
   1  -4  -1  135.27    8.45 
   1  -4  -1  131.28    8.44 
   1  -4  -1  144.07    8.44 
   1  -4  -1  138.67    8.40 
   1  -4  -1  138.46    8.38 
   1  -4  -1  142.11    8.38 
  -1  -4   1  130.90    8.38 
  -1  -4   1  144.46    8.45 
   1  -4  -1  142.56    8.37 
  -1  -4   1  143.96    8.37 
   1  -4  -1  137.57    8.44 
  -1  -4   1  142.33    8.38 
  -1  -4   1  138.08    8.47 
   1  -4  -1  150.32    8.49 
  -1  -4   1  140.59    8.45 
  -1  -4   1  135.25    8.46 
   1  -4  -1  139.06    8.39 
  -1  -4   1  141.14    8.37 
   1  -4  -1  145.76    8.39 
   1  -4  -1  142.74    8.37 
  -1  -4   1  138.37    8.38 
  -1  -4   1  140.71    8.39 
   1  -4  -1  140.16    8.38 
   1  -4  -1  140.66    8.53 
   1   4  -1  132.48    8.36 
   1   4  -1  130.37    8.38 
   1   4  -1  129.88    8.38 
  -1   4   1  121.78    8.53 
   1   4  -1  140.67    8.37 
   1   4  -1  137.56    8.38 
   1   4  -1  152.10    8.49 
   1   4  -1  135.02    8.37 
  -1   4   1  140.69    8.44 
  -1   4   1  140.97    8.40 
  -1   4   1  138.40    8.37 
   1   4  -1  143.41    8.39 
  -1   4   1  134.22    8.43 
   1   4  -1  140.78    8.43 
   1   4  -1  143.56    8.39 
  -1   4   1  139.19    8.40 
  -1   4   1  137.37    8.41 
  -1   4   1  138.54    8.38 
   1   4  -1  126.89    8.35 
   1   4  -1  140.40    8.38 
   1   4  -1  142.86    8.50 
   1   4  -1  143.17    8.45 
  -1   4   1  136.29    8.38 
   1   4  -1  136.03    8.36 
   1   4  -1  138.86    8.42 
   1   4  -1  130.93    8.42 
  -1   4   1  141.65    8.45 
   0  -4  -1   46.86    3.06 
   0  -4  -1   48.86    2.98 
   0  -4  -1   52.53    2.99 
   0  -4  -1   51.21    2.99 
   0  -4   1   51.12    3.04 
   0  -4   1   49.33    3.05 
   0  -4  -1   48.90    3.06 
   0  -4   1   49.14    2.99 
   0  -4   1   54.13    2.98 
   0  -4   1   50.60    3.07 
   0  -4  -1   48.25    3.01 
   0  -4  -1   49.24    3.00 
   0  -4   1   50.04    2.98 
   0  -4  -1   50.47    2.98 
   0  -4   1   49.13    3.03 
   0  -4  -1   48.55    2.99 
   0  -4  -1   46.33    3.00 
   0  -4   1   49.36    3.00 
   0  -4  -1   46.32    3.05 
   0  -4   1   48.49    2.99 
   0  -4   1   46.23    3.00 
   0  -4   1   47.98    2.98 
   0  -4   1   47.96    3.05 
   0  -4  -1   48.55    3.03 
   0  -4   1   49.06    3.00 
   0  -4   1   49.57    2.98 
   0  -4   1   48.98    3.00 
   0  -4  -1   51.62    3.00 
   0  -4   1   47.28    3.10 
   0   4   1   48.68    2.98 
   0   4   1   50.20    2.98 
   0   4   1   50.05    2.98 
   0   4   1   49.01    2.99 
   0   4   1   52.70    2.98 
   0   4  -1   48.75    2.99 
   0   4  -1   51.39    2.98 
   0   4  -1   45.27    2.99 
   0   4   1   48.63    3.00 
   0   4  -1   49.89    2.98 
   0   4  -1   47.74    3.03 
   0   4  -1   47.42    3.05 
   0   4  -1   45.03    3.01 
   0   4  -1   51.09    2.98 
   0   4   1   48.72    3.03 
   0   4  -1   48.31    3.00 
   0   4  -1   51.66    3.08 
   0   4   1   48.86    3.00 
   0   4   1   50.39    3.01 
   0   4  -1   48.60    3.04 
   0   4  -1   47.01    2.99 
   0   4   1   49.33    3.05 
   0   4   1   48.85    3.04 
   0   4  -1   46.80    3.05 
   0   4  -1   45.88    3.01 
   0   4   1   46.08    3.01 
   1  -4   1   92.40    5.62 
  -1  -4  -1   93.96    5.53 
   1  -4   1   85.14    5.64 
   1  -4   1   93.14    5.53 
  -1  -4  -1   89.34    5.67 
   1  -4   1   89.62    5.53 
  -1  -4  -1   89.88    5.53 
   1  -4   1   97.32    5.60 
  -1  -4  -1   96.28    5.59 
  -1  -4  -1   97.31    5.54 
  -1  -4  -1   97.39    5.54 
   1  -4   1   94.14    5.52 
  -1  -4  -1   88.54    5.58 
   1  -4   1   96.70    5.52 
   1  -4   1   92.57    5.62 
  -1  -4  -1   93.77    5.53 
   1   4   1   90.55    5.56 
  -1   4  -1   92.71    5.62 
  -1   4  -1   85.19    5.60 
   1   4   1   93.91    5.52 
  -1   4  -1   89.16    5.61 
   1   4   1   86.99    5.52 
  -1   4  -1   93.95    5.58 
   1   4   1   88.93    5.57 
   1   4   1   93.60    5.57 
  -1   4  -1   92.25    5.55 
  -1   4  -1   88.40    5.54 
   1   4   1   89.05    5.59 
   1   4   1   88.61    5.59 
   2  -4   1  140.15    8.75 
   2  -4   1  150.65    8.70 
  -2  -4  -1  142.16    8.67 
  -2  -4  -1  136.25    8.66 
  -2  -4  -1  144.46    8.63 
   2  -4   1  142.69    8.70 
  -2  -4  -1  141.14    8.62 
   2  -4   1  136.58    8.71 
   2   4   1  147.68    8.78 
  -2   4  -1  153.26    8.68 
   2   4   1  146.22    8.66 
  -2   4  -1  146.32    8.62 
  -2   4  -1  147.31    8.65 
   2   4   1  143.77    8.67 
  -2   4  -1  144.63    8.71 
  -2   4  -1  140.11    8.65 
  -2   4  -1  136.12    8.84 
   2   4   1  140.52    8.83 
  -2   4  -1  143.89    8.72 
   3  -4   1   25.87    1.79 
   3  -4   1   26.77    2.02 
   3   4   1   26.21    2.19 
  -3   4  -1   28.66    1.71 
  -3   4  -1   27.19    1.88 
   3   4   1   29.34    2.10 
  -3   4  -1   25.92    1.82 
   4  -4   1   15.55    1.24 
  -4  -4  -1   15.38    1.08 
  -4   4  -1   14.55    1.14 
   4   4   1   15.64    1.70 
   4   4   1   15.78    1.21 
   5  -4   1   15.31    1.14 
   5  -4   1   13.82    1.96 
   5  -4   1   13.91    0.89 
   5  -4   1   13.12    0.90 
  -5  -4  -1   12.65    1.12 
  -5   4  -1   14.71    1.15 
   6  -4   1   11.42    1.51 
   6  -4   1   13.80    0.86 
   6  -4   1   14.34    1.75 
   6  -4   1    9.73    1.57 
   6   4   1   12.32    0.82 
   6   4   1   12.79    1.44 
   6   4   1   12.61    0.86 
   6   4   1   13.02    1.81 
   7  -5  -1    1.22    0.59 
   7   5  -1    0.78    0.64 
   6  -5  -1    7.93    1.39 
   6  -5  -1   11.50    0.73 
   6  -5  -1   10.65    0.72 
   6  -5  -1   10.03    0.92 
   6  -5  -1    7.91    1.32 
   6  -5  -1    9.97    0.80 
   6   5  -1   10.70    1.27 
   6   5  -1   12.60    1.57 
   5  -5  -1   30.06    2.38 
   5  -5  -1   28.63    2.18 
   5  -5  -1   28.67    2.34 
  -5  -5   1   26.66    2.21 
  -5   5   1   29.55    2.11 
   5   5  -1   25.61    1.77 
   5   5  -1   28.07    2.17 
   4  -5  -1    5.43    1.15 
   4  -5  -1    5.70    1.41 
   4  -5  -1    7.43    0.74 
  -4  -5   1    8.01    0.89 
   4   5  -1    7.66    1.06 
   4   5  -1    9.28    1.07 
  -4   5   1    8.66    0.82 
   4   5  -1    7.54    1.37 
  -3  -5   1   65.26    3.92 
  -3  -5   1   59.03    3.92 
   3  -5  -1   57.82    3.99 
  -3  -5   1   59.29    3.78 
  -3  -5   1   58.23    3.88 
   3  -5  -1   59.55    3.87 
   3  -5  -1   55.99    3.89 
   3  -5  -1   58.73    3.85 
  -3   5   1   61.04    3.91 
   3   5  -1   63.90    3.99 
   3   5  -1   62.82    4.02 
   3   5  -1   56.48    3.86 
  -3   5   1   68.51    3.93 
  -3   5   1   63.88    3.76 
   3   5  -1   57.59    3.83 
  -3   5   1   62.26    3.88 
   2  -5  -1   88.04    6.03 
  -2  -5   1   99.67    6.05 
  -2  -5   1  100.74    6.03 
  -2  -5   1  100.64    6.03 
   2  -5  -1   98.12    6.02 
  -2  -5   1   92.84    5.92 
  -2  -5   1   94.90    5.93 
   2  -5  -1   98.74    6.10 
   2  -5  -1   98.07    6.07 
  -2   5   1   98.53    6.05 
  -2   5   1   92.20    6.12 
   2   5  -1   95.79    6.03 
   2   5  -1   97.48    6.05 
  -2   5   1  101.03    6.02 
   2   5  -1  100.51    6.05 
  -2   5   1   98.32    5.95 
   2   5  -1   97.24    6.07 
   2   5  -1   98.10    6.00 
  -2   5   1   98.20    5.92 
   2   5  -1   98.70    6.02 
  -1  -5   1   58.33    3.40 
   1  -5  -1   58.88    3.53 
  -1  -5   1   56.98    3.51 
   1  -5  -1   55.80    3.39 
   1  -5  -1   52.75    3.59 
  -1  -5   1   54.19    3.50 
   1  -5  -1   53.87    3.38 
   1  -5  -1   58.35    3.48 
   1  -5  -1   51.99    3.48 
   1  -5  -1   61.35    3.41 
  -1  -5   1   53.24    3.40 
  -1  -5   1   55.52    3.49 
  -1  -5   1   58.85    3.38 
   1  -5  -1   51.12    3.38 
   1  -5  -1   50.78    3.41 
   1  -5  -1   54.01    3.39 
   1  -5  -1   54.76    3.42 
  -1  -5   1   53.52    3.38 
   1  -5  -1   50.79    3.50 
  -1  -5   1   56.30    3.47 
   1  -5  -1   58.01    3.41 
  -1  -5   1   54.25    3.41 
   1  -5  -1   55.75    3.42 
  -1  -5   1   53.32    3.39 
   1  -5  -1   56.07    3.47 
   1  -5  -1   52.13    3.38 
   1  -5  -1   56.81    3.41 
   1   5  -1   52.54    3.45 
   1   5  -1   56.71    3.46 
   1   5  -1   59.90    3.39 
   1   5  -1   49.14    3.39 
   1   5  -1   61.31    3.40 
  -1   5   1   50.85    3.41 
   1   5  -1   55.06    3.41 
  -1   5   1   52.34    3.57 
  -1   5   1   56.75    3.48 
   1   5  -1   51.21    3.37 
  -1   5   1   53.51    3.38 
   1   5  -1   60.16    3.43 
  -1   5   1   57.24    3.38 
   1   5  -1   58.45    3.37 
   1   5  -1   57.34    3.56 
   1   5  -1   53.31    3.40 
  -1   5   1   56.07    3.41 
   1   5  -1   56.38    3.39 
  -1   5   1   55.91    3.39 
   1   5  -1   54.09    3.39 
  -1   5   1   52.70    3.45 
  -1   5   1   57.33    3.47 
   1   5  -1   57.42    3.41 
  -1   5   1   59.41    3.50 
   1   5  -1   61.31    3.54 
   1   5  -1   51.26    3.37 
   1   5  -1   52.49    3.48 
   1   5  -1   58.35    3.45 
   1   5  -1   54.78    3.38 
  -1   5   1   53.27    3.44 
   1   5  -1   53.77    3.49 
   0  -5  -1   14.18    0.99 
   0  -5   1   14.16    0.97 
   0  -5   1   13.55    1.09 
   0  -5   1   14.78    0.95 
   0  -5  -1   15.68    0.99 
   0  -5   1   13.99    1.01 
   0  -5  -1   13.33    1.11 
   0  -5   1   15.05    1.00 
   0  -5   1   14.03    1.05 
   0  -5   1   13.59    0.99 
   0  -5  -1   15.53    1.12 
   0  -5   1   13.55    1.21 
   0  -5   1   14.01    1.08 
   0  -5  -1   14.57    0.98 
   0  -5   1   16.03    0.97 
   0  -5   1   13.82    0.99 
   0  -5  -1   14.25    1.07 
   0  -5  -1   14.44    0.97 
   0  -5  -1   13.77    1.01 
   0  -5  -1   13.60    1.07 
   0  -5  -1   14.85    0.98 
   0  -5   1   14.50    0.97 
   0  -5   1   14.45    1.09 
   0  -5  -1   13.69    1.01 
   0  -5  -1   14.07    1.32 
   0  -5   1   14.39    1.02 
   0  -5  -1   16.12    1.02 
   0  -5  -1   12.39    1.11 
   0  -5   1   14.68    1.07 
   0  -5   1   14.17    0.99 
   0   5  -1   15.94    1.09 
   0   5  -1   15.24    0.97 
   0   5  -1   13.54    1.02 
   0   5   1   14.69    1.06 
   0   5  -1   14.94    0.97 
   0   5   1   14.19    0.99 
   0   5   1   13.33    1.02 
   0   5   1   16.62    0.96 
   0   5  -1   14.79    1.05 
   0   5  -1   14.09    0.98 
   0   5  -1   14.87    1.02 
   0   5   1   15.70    1.02 
   0   5   1   15.46    1.04 
   0   5  -1   13.68    1.05 
   0   5  -1   14.22    1.09 
   0   5   1   14.18    1.06 
   0   5  -1   15.56    1.11 
   0   5   1   15.50    1.10 
   0   5  -1   15.09    1.00 
   0   5   1   14.21    1.03 
   0   5  -1   15.49    0.97 
   0   5   1   14.98    0.97 
   0   5  -1   15.48    1.14 
   0   5   1   15.53    1.07 
   0   5  -1   13.30    1.02 
   0   5  -1   14.58    1.10 
   0   5   1   13.61    1.03 
   0   5   1   15.29    0.97 
   0   5   1   15.10    0.97 
   0   5  -1   14.81    1.01 
   1  -5   1   88.96    5.36 
  -1  -5  -1   89.39    5.36 
  -1  -5  -1   87.60    5.37 
  -1  -5  -1   88.44    5.36 
  -1  -5  -1   90.34    5.44 
  -1  -5  -1   90.76    5.46 
   1  -5   1   90.03    5.37 
  -1  -5  -1   87.94    5.37 
  -1  -5  -1   88.70    5.55 
  -1  -5  -1   92.44    5.44 
   1  -5   1   93.21    5.44 
   1  -5   1   90.65    5.35 
   1  -5   1   88.98    5.37 
   1  -5   1   92.83    5.37 
   1  -5   1   89.72    5.35 
   1  -5   1   98.10    5.48 
   1  -5   1   91.96    5.37 
  -1  -5  -1   87.94    5.38 
   1  -5   1   91.82    5.36 
   1  -5   1   86.64    5.35 
   1  -5   1   90.20    5.50 
   1  -5   1   92.66    5.48 
   1   5   1   88.17    5.35 
   1   5   1   90.58    5.44 
   1   5   1   83.54    5.46 
  -1   5  -1   85.94    5.37 
  -1   5  -1   86.56    5.55 
  -1   5  -1   93.19    5.38 
   1   5   1   88.43    5.41 
  -1   5  -1   82.82    5.47 
   1   5   1   89.53    5.41 
  -1   5  -1   89.52    5.45 
  -1   5  -1   90.20    5.39 
  -1   5  -1   85.42    5.46 
  -1   5  -1   84.35    5.42 
   1   5   1   82.36    5.35 
  -1   5  -1   88.95    5.37 
  -1   5  -1   89.86    5.40 
   1   5   1   85.50    5.42 
   1   5   1   79.43    5.44 
   1   5   1   86.98    5.45 
   2  -5   1  121.38    7.10 
   2  -5   1  118.81    7.14 
   2  -5   1  117.71    7.07 
  -2  -5  -1  118.38    7.06 
  -2  -5  -1  115.92    7.00 
  -2  -5  -1  127.96    7.09 
  -2  -5  -1  111.82    7.00 
   2  -5   1  121.22    7.09 
  -2   5  -1  110.15    7.24 
  -2   5  -1  111.12    6.99 
  -2   5  -1  117.88    7.06 
  -2   5  -1  118.10    7.03 
   2   5   1  108.31    7.20 
   2   5   1  116.95    7.06 
  -2   5  -1  114.63    7.13 
  -2   5  -1  115.33    7.10 
   2   5   1  116.53    7.05 
   2   5   1  113.26    7.15 
   2   5   1  107.17    7.15 
   3  -5   1   62.07    3.82 
  -3  -5  -1   65.67    3.84 
  -3  -5  -1   63.73    3.71 
  -3   5  -1   61.03    3.85 
  -3   5  -1   60.55    3.83 
   3   5   1   58.55    4.14 
   3   5   1   56.56    3.78 
   3   5   1   62.83    4.03 
   3   5   1   57.23    3.76 
  -3   5  -1   60.08    3.73 
   4  -5   1    7.23    1.02 
  -4  -5  -1    6.80    0.65 
   4  -5   1    6.38    0.82 
   4   5   1    6.22    1.33 
  -4   5  -1    5.96    0.69 
   4   5   1    7.19    0.85 
   4   5   1    5.16    0.96 
   5  -5   1   25.07    2.19 
   5  -5   1   20.26    1.27 
   5  -5   1   17.25    1.27 
   5  -5   1   22.10    1.53 
  -5  -5  -1   18.70    1.57 
  -5   5  -1   21.55    1.62 
   6  -5   1   13.47    1.45 
   6  -5   1   12.12    0.85 
   6   5   1   11.89    0.81 
   6   5   1   11.75    1.38 
   6   5   1   11.93    0.83 
   6   5   1   14.71    1.82 
   7  -6  -1    3.50    0.94 
   6  -6  -1    5.44    0.48 
   6  -6  -1    2.68    0.91 
   6  -6  -1    4.85    0.56 
   6  -6  -1    5.43    1.09 
   6  -6  -1    4.61    1.22 
   6  -6  -1    5.90    1.53 
   6  -6  -1    5.19    0.59 
   6  -6  -1    5.80    0.46 
   6   6  -1    7.45    1.47 
   6   6  -1    4.83    1.10 
   6   6  -1    5.37    0.58 
   5  -6  -1   29.05    2.34 
   5  -6  -1   23.83    2.23 
   5  -6  -1   26.38    2.08 
   5   6  -1   24.25    1.61 
   5   6  -1   23.41    2.02 
   5   6  -1   25.25    2.23 
   4  -6  -1   20.42    1.47 
   4  -6  -1   19.26    1.72 
   4  -6  -1   20.14    1.36 
   4  -6  -1   18.67    1.78 
  -4  -6   1   22.63    1.57 
  -4   6   1   23.89    1.56 
   4   6  -1   20.26    1.69 
   4   6  -1   21.73    2.05 
   4   6  -1   20.05    1.67 
   3  -6  -1   36.41    2.69 
   3  -6  -1   41.12    2.59 
   3  -6  -1   37.12    2.55 
  -3  -6   1   42.36    2.60 
   3  -6  -1   35.61    2.57 
  -3  -6   1   38.28    2.59 
  -3  -6   1   42.05    2.59 
  -3  -6   1   41.10    2.46 
   3   6  -1   37.93    2.71 
   3   6  -1   31.99    2.52 
  -3   6   1   36.89    2.59 
   3   6  -1   34.14    2.62 
  -3   6   1   37.51    2.42 
   3   6  -1   32.80    2.50 
  -3   6   1   36.79    2.53 
  -3   6   1   40.50    2.58 
   2  -6  -1   31.71    2.39 
   2  -6  -1   33.87    2.29 
  -2  -6   1   33.92    2.23 
  -2  -6   1   31.88    2.12 
  -2  -6   1   31.80    2.13 
  -2  -6   1   32.98    2.27 
   2  -6  -1   34.41    2.06 
  -2  -6   1   34.63    2.26 
   2  -6  -1   30.85    2.07 
   2  -6  -1   33.68    2.23 
  -2   6   1   34.12    2.12 
  -2   6   1   35.20    2.24 
   2   6  -1   34.98    2.27 
  -2   6   1   33.88    2.15 
  -2   6   1   32.39    2.40 
   2   6  -1   35.51    2.31 
   2   6  -1   32.23    2.28 
   2   6  -1   31.84    2.31 
   2   6  -1   28.66    2.30 
  -2   6   1   34.61    2.28 
   2   6  -1   33.10    2.24 
   1  -6  -1   28.67    2.24 
   1  -6  -1   28.21    1.84 
  -1  -6   1   26.18    1.82 
  -1  -6   1   27.65    1.84 
   1  -6  -1   24.13    1.93 
   1  -6  -1   25.77    2.12 
  -1  -6   1   29.68    2.01 
   1  -6  -1   30.48    1.84 
   1  -6  -1   26.79    1.96 
   1  -6  -1   28.06    1.86 
   1  -6  -1   26.69    1.83 
  -1  -6   1   28.11    1.92 
   1  -6  -1   27.18    2.00 
   1  -6  -1   27.49    1.88 
  -1  -6   1   26.62    1.83 
   1  -6  -1   30.48    1.89 
   1  -6  -1   28.41    1.89 
  -1  -6   1   30.04    1.98 
   1  -6  -1   28.88    1.87 
  -1  -6   1   28.81    1.95 
   1  -6  -1   28.77    1.87 
   1  -6  -1   29.27    2.02 
   1  -6  -1   31.55    1.95 
  -1  -6   1   30.49    1.86 
   1  -6  -1   30.43    2.08 
  -1   6   1   29.13    1.85 
  -1   6   1   27.24    1.93 
   1   6  -1   28.97    1.83 
  -1   6   1   29.21    1.96 
  -1   6   1   28.72    1.85 
  -1   6   1   29.85    1.97 
   1   6  -1   28.51    1.86 
   1   6  -1   27.70    1.97 
   1   6  -1   30.60    2.10 
   1   6  -1   28.93    1.82 
   1   6  -1   30.38    1.94 
   1   6  -1   29.75    1.84 
   1   6  -1   28.91    1.88 
   1   6  -1   26.87    1.86 
  -1   6   1   30.86    1.88 
  -1   6   1   30.90    1.95 
   1   6  -1   30.02    1.82 
   1   6  -1   29.40    1.97 
  -1   6   1   29.16    2.09 
   1   6  -1   30.66    2.01 
   1   6  -1   31.16    1.88 
  -1   6   1   28.15    1.83 
   1   6  -1   29.65    1.82 
   1   6  -1   30.34    1.94 
   1   6  -1   31.79    1.85 
   1   6  -1   31.05    1.85 
   0  -6  -1   25.25    1.69 
   0  -6   1   24.51    1.66 
   0  -6   1   23.90    1.76 
   0  -6  -1   25.95    1.79 
   0  -6  -1   25.84    1.64 
   0  -6   1   26.43    1.63 
   0  -6   1   26.77    1.66 
   0  -6  -1   23.80    1.78 
   0  -6   1   25.49    1.75 
   0  -6  -1   24.55    1.67 
   0  -6   1   24.36    1.76 
   0  -6  -1   24.95    1.63 
   0  -6  -1   25.11    1.78 
   0  -6   1   26.17    1.72 
   0  -6   1   24.36    1.62 
   0  -6   1   24.91    1.65 
   0  -6  -1   23.36    1.67 
   0  -6   1   24.84    1.66 
   0  -6   1   24.79    1.74 
   0  -6  -1   24.49    1.66 
   0  -6   1   26.41    1.64 
   0  -6  -1   25.02    1.71 
   0  -6  -1   25.07    1.66 
   0  -6  -1   24.52    1.98 
   0  -6  -1   26.54    1.65 
   0  -6  -1   25.93    1.86 
   0  -6   1   23.68    1.88 
   0  -6  -1   23.94    1.78 
   0  -6   1   25.28    1.68 
   0  -6  -1   23.34    1.69 
   0  -6   1   27.14    1.64 
   0  -6   1   24.80    1.69 
   0  -6  -1   25.23    1.65 
   0  -6   1   26.20    1.67 
   0   6  -1   26.94    1.68 
   0   6   1   25.00    1.72 
   0   6  -1   26.42    1.67 
   0   6  -1   26.64    1.72 
   0   6  -1   25.69    1.68 
   0   6  -1   27.89    1.69 
   0   6   1   25.34    1.66 
   0   6   1   26.15    1.63 
   0   6   1   25.79    1.71 
   0   6   1   24.35    1.80 
   0   6  -1   27.45    1.63 
   0   6  -1   26.05    1.65 
   0   6  -1   23.55    1.68 
   0   6  -1   25.35    1.72 
   0   6   1   21.79    1.70 
   0   6  -1   26.76    1.77 
   0   6  -1   27.61    1.64 
   0   6   1   28.19    1.63 
   0   6  -1   27.91    1.64 
   0   6   1   26.14    1.75 
   0   6   1   26.03    1.64 
   0   6  -1   26.73    1.74 
   0   6   1   27.01    1.69 
   0   6   1   27.95    1.75 
   0   6  -1   26.11    1.75 
   0   6   1   27.14    1.64 
   0   6  -1   27.42    1.79 
   0   6  -1   27.44    1.83 
   0   6   1   26.55    1.76 
   0   6   1   24.80    1.69 
   0   6   1   24.81    1.69 
  -1  -6  -1   44.22    2.78 
   1  -6   1   41.54    2.78 
   1  -6   1   39.25    2.80 
   1  -6   1   47.59    2.92 
   1  -6   1   44.11    2.97 
  -1  -6  -1   43.55    2.92 
   1  -6   1   49.04    2.97 
   1  -6   1   45.91    2.79 
  -1  -6  -1   43.60    2.80 
  -1  -6  -1   43.59    3.01 
   1  -6   1   43.80    2.80 
   1  -6   1   46.44    2.79 
   1  -6   1   48.07    2.88 
   1  -6   1   42.68    2.80 
   1  -6   1   42.81    2.76 
   1  -6   1   45.54    2.87 
  -1  -6  -1   42.10    2.78 
  -1  -6  -1   45.50    2.88 
   1  -6   1   47.59    2.79 
  -1  -6  -1   44.31    2.88 
  -1  -6  -1   43.24    2.80 
  -1  -6  -1   44.34    2.78 
  -1   6  -1   46.52    2.79 
  -1   6  -1   45.69    2.82 
   1   6   1   40.51    2.75 
   1   6   1   46.81    2.76 
  -1   6  -1   45.34    2.79 
  -1   6  -1   47.34    2.92 
   1   6   1   46.95    2.86 
   1   6   1   47.07    2.75 
   1   6   1   44.78    2.85 
   1   6   1   46.03    2.91 
   1   6   1   47.90    2.85 
   1   6   1   42.14    2.89 
  -1   6  -1   47.19    2.87 
  -1   6  -1   44.34    3.01 
  -1   6  -1   48.06    2.83 
  -1   6  -1   47.00    2.79 
  -1   6  -1   48.86    2.90 
  -1   6  -1   49.81    2.97 
   2  -6   1   42.48    2.69 
   2  -6   1   44.78    2.72 
  -2  -6  -1   43.57    2.67 
  -2  -6  -1   41.62    2.60 
  -2  -6  -1   40.81    2.57 
  -2  -6  -1   45.16    2.73 
   2  -6   1   42.29    2.72 
  -2   6  -1   38.49    2.58 
  -2   6  -1   39.69    2.90 
  -2   6  -1   39.28    2.68 
  -2   6  -1   43.16    2.63 
  -2   6  -1   41.56    2.73 
   2   6   1   40.71    2.88 
   2   6   1   41.81    2.79 
   2   6   1   40.83    2.66 
   2   6   1   40.01    2.69 
   2   6   1   41.20    2.78 
   2   6   1   43.77    2.68 
   3  -6   1   57.22    3.74 
  -3  -6  -1   56.72    3.76 
  -3  -6  -1   59.07    3.63 
   3   6   1   57.33    3.69 
  -3   6  -1   62.26    3.76 
   3   6   1   56.61    3.98 
   3   6   1   61.09    3.93 
  -3   6  -1   58.74    3.65 
  -3   6  -1   63.29    3.79 
   4  -6   1   27.95    1.98 
   4  -6   1   28.35    2.06 
  -4  -6  -1   31.65    1.91 
   4   6   1   28.17    2.09 
   4   6   1   29.07    2.39 
   4   6   1   29.29    2.01 
  -4   6  -1   26.31    1.92 
   5  -6   1   38.89    2.50 
   5  -6   1   37.42    2.34 
   6  -6   1    3.05    1.45 
   6  -6   1    5.10    0.46 
   6  -6   1    5.70    1.17 
   6   6   1    4.86    1.17 
   6   6   1    4.73    0.44 
   6   6   1    5.14    1.46 
   6   6   1    4.42    0.44 
   7  -7  -1    1.90    0.79 
   6  -7  -1    7.28    0.74 
   6  -7  -1    7.88    0.67 
   6  -7  -1    7.95    0.92 
   6  -7  -1    6.17    1.18 
   6  -7  -1    7.71    0.61 
   6  -7  -1    8.36    0.60 
   6  -7  -1    8.64    1.53 
   6   7  -1    7.69    0.68 
   6   7  -1    8.97    1.37 
   6   7  -1    9.82    1.72 
   5  -7  -1    6.59    1.41 
   5  -7  -1    7.64    1.19 
   5  -7  -1    7.91    1.41 
   5   7  -1    5.75    1.15 
   5   7  -1    4.63    1.18 
   5   7  -1    4.93    0.53 
   4  -7  -1   34.04    2.51 
  -4  -7   1   34.51    2.27 
   4  -7  -1   32.19    2.20 
   4  -7  -1   32.69    2.42 
   4  -7  -1   33.56    2.10 
   4   7  -1   31.73    2.38 
   4   7  -1   34.33    2.40 
  -4   7   1   32.86    2.26 
   3  -7  -1   66.48    4.06 
   3  -7  -1   55.94    4.01 
  -3  -7   1   64.25    3.92 
   3  -7  -1   59.93    3.94 
   3  -7  -1   64.85    4.14 
  -3  -7   1   67.95    4.05 
   3  -7  -1   61.38    4.07 
  -3  -7   1   66.67    4.06 
   3  -7  -1   63.07    4.00 
  -3   7   1   57.92    3.98 
   3   7  -1   67.84    4.15 
  -3   7   1   64.42    4.09 
   3   7  -1   54.17    3.98 
   3   7  -1   62.38    3.89 
   3   7  -1   62.85    3.85 
  -3   7   1   62.03    4.07 
   3   7  -1   55.17    3.97 
  -3   7   1   61.98    3.89 
   3   7  -1   64.73    4.11 
  -2  -7   1  134.00    7.90 
   2  -7  -1  130.73    7.74 
  -2  -7   1  126.48    7.81 
   2  -7  -1  139.51    7.78 
  -2  -7   1  135.31    7.92 
   2  -7  -1  131.67    8.02 
  -2  -7   1  125.58    7.94 
  -2  -7   1  125.72    7.80 
   2  -7  -1  139.75    7.76 
   2  -7  -1  130.01    7.95 
   2  -7  -1  130.96    7.74 
   2  -7  -1  126.56    7.88 
   2   7  -1  112.18    7.91 
   2   7  -1  122.56    7.91 
  -2   7   1  131.27    7.93 
  -2   7   1  130.60    8.05 
   2   7  -1  128.24    7.90 
  -2   7   1  112.72    7.78 
  -2   7   1  127.25    7.87 
   2   7  -1  129.97    7.89 
   2   7  -1  131.04    7.95 
  -2   7   1  118.88    7.84 
   2   7  -1  132.31    7.95 
  -2   7   1  124.78    7.82 
  -1  -7   1   47.49    2.92 
   1  -7  -1   44.85    2.93 
   1  -7  -1   45.67    3.04 
  -1  -7   1   44.30    3.09 
   1  -7  -1   46.55    2.95 
  -1  -7   1   49.97    2.94 
   1  -7  -1   45.97    3.03 
   1  -7  -1   48.83    2.96 
   1  -7  -1   47.40    3.29 
  -1  -7   1   49.82    3.06 
  -1  -7   1   48.23    3.05 
   1  -7  -1   47.54    2.97 
   1  -7  -1   49.40    3.18 
   1  -7  -1   44.54    2.96 
   1  -7  -1   44.69    2.95 
   1  -7  -1   53.19    3.11 
   1  -7  -1   48.31    3.08 
  -1  -7   1   49.56    2.96 
  -1   7   1   48.32    3.07 
  -1   7   1   45.11    3.01 
   1   7  -1   50.69    3.11 
   1   7  -1   48.09    2.94 
   1   7  -1   49.29    2.96 
   1   7  -1   43.64    2.91 
   1   7  -1   50.68    3.19 
  -1   7   1   48.49    2.98 
   1   7  -1   47.86    2.97 
   1   7  -1   50.21    3.08 
  -1   7   1   46.81    2.96 
  -1   7   1   48.73    3.18 
  -1   7   1   45.88    2.94 
  -1   7   1   44.88    3.04 
   1   7  -1   45.66    2.92 
   1   7  -1   45.16    2.93 
   1   7  -1   46.77    3.05 
   1   7  -1   47.19    3.02 
  -1   7   1   44.02    3.01 
   1   7  -1   45.08    2.95 
  -1   7   1   45.66    2.92 
   0  -7   1   99.63    5.89 
   0  -7  -1   99.58    6.02 
   0  -7   1   97.12    5.92 
   0  -7  -1  103.07    6.18 
   0  -7   1   99.72    6.10 
   0  -7   1   99.25    5.90 
   0  -7  -1   92.53    5.89 
   0  -7  -1   98.91    5.91 
   0  -7   1   97.91    5.88 
   0  -7  -1   94.25    5.91 
   0  -7   1   97.70    5.90 
   0  -7   1  105.05    5.91 
   0  -7   1  101.44    5.89 
   0  -7  -1   96.83    6.00 
   0  -7  -1   96.48    5.92 
   0  -7   1   96.05    5.99 
   0  -7   1   99.14    5.90 
   0  -7   1   99.33    5.92 
   0  -7  -1   99.41    5.88 
   0  -7  -1   98.19    5.92 
   0  -7  -1   94.74    5.98 
   0  -7  -1   98.48    6.10 
   0  -7   1   93.10    5.97 
   0  -7   1  101.87    6.03 
   0  -7  -1  102.20    5.90 
   0  -7   1   99.91    5.97 
   0  -7   1   93.98    5.98 
   0  -7   1   93.85    5.96 
   0  -7  -1   94.37    5.87 
   0  -7  -1   96.33    5.90 
   0  -7   1   91.49    5.90 
   0   7   1   90.66    5.89 
   0   7  -1  100.74    5.91 
   0   7  -1  102.17    6.01 
   0   7   1   97.04    5.92 
   0   7   1   88.41    5.95 
   0   7  -1  102.40    5.92 
   0   7   1   93.60    5.88 
   0   7   1   88.63    5.93 
   0   7  -1   94.55    5.90 
   0   7  -1   94.58    6.03 
   0   7   1   96.77    5.88 
   0   7  -1  100.32    6.05 
   0   7  -1   96.35    6.00 
   0   7  -1  100.61    5.99 
   0   7  -1   96.64    5.88 
   0   7  -1   95.85    5.90 
   0   7  -1  100.57    5.88 
   0   7  -1   99.29    5.90 
   0   7   1   99.14    6.00 
   0   7  -1   95.07    5.93 
   0   7   1   88.75    5.87 
   0   7   1   97.44    6.03 
   0   7   1   96.85    5.99 
   0   7   1   91.88    5.94 
   0   7   1   94.35    5.88 
   0   7   1   94.61    5.91 
   0   7   1   94.60    5.91 
   0   7   1  100.52    5.97 
   0   7  -1   92.74    5.93 
   0   7  -1   97.59    5.93 
   0   7   1   87.99    5.96 
   0   7  -1   95.03    5.96 
   0   7  -1   98.57    5.88 
   0   7   1  100.30    5.93 
   1  -7   1   25.09    1.66 
   1  -7   1   23.32    1.50 
  -1  -7  -1   25.02    1.69 
   1  -7   1   23.10    1.54 
   1  -7   1   25.60    1.56 
   1  -7   1   22.44    1.55 
   1  -7   1   23.24    1.70 
  -1  -7  -1   23.60    1.56 
   1  -7   1   21.42    1.78 
   1  -7   1   24.14    1.57 
  -1  -7  -1   23.46    1.67 
   1  -7   1   20.82    1.51 
  -1  -7  -1   26.19    1.76 
  -1  -7  -1   24.38    1.87 
  -1  -7  -1   22.92    1.53 
   1  -7   1   24.19    1.57 
  -1   7  -1   23.31    1.58 
  -1   7  -1   19.99    1.80 
  -1   7  -1   21.53    1.57 
   1   7   1   23.97    1.62 
  -1   7  -1   22.99    1.71 
  -1   7  -1   21.54    1.53 
   1   7   1   23.60    1.63 
   1   7   1   25.53    1.52 
   1   7   1   27.91    1.52 
   1   7   1   22.98    1.50 
   1   7   1   25.21    1.71 
   1   7   1   23.09    1.70 
   1   7   1   23.28    1.49 
  -1   7  -1   25.49    1.66 
   1   7   1   24.84    1.51 
   1   7   1   25.52    1.50 
  -2  -7  -1   78.86    4.72 
  -2  -7  -1   82.95    4.87 
   2  -7   1   74.75    4.85 
  -2  -7  -1   79.76    4.81 
   2  -7   1   80.26    4.89 
  -2  -7  -1   78.46    4.73 
   2  -7   1   79.40    4.83 
  -2   7  -1   81.65    4.72 
   2   7   1   73.01    4.80 
   2   7   1   81.82    4.88 
  -2   7  -1   70.16    4.99 
  -2   7  -1   75.99    4.86 
   2   7   1   81.43    4.90 
  -2   7  -1   70.56    4.75 
   2   7   1   74.41    4.81 
  -2   7  -1   80.17    4.80 
   2   7   1   74.96    4.95 
   2   7   1   70.54    4.73 
   3  -7   1   53.62    3.35 
   3  -7   1   50.53    3.41 
   3  -7   1   50.82    3.40 
   3  -7   1   51.56    3.28 
  -3  -7  -1   56.70    3.33 
  -3  -7  -1   53.17    3.47 
  -3  -7  -1   47.53    3.46 
   3  -7   1   52.10    3.44 
  -3   7  -1   59.98    3.33 
   3   7   1   53.65    3.74 
   3   7   1   58.35    3.63 
  -3   7  -1   55.57    3.49 
   3   7   1   47.82    3.38 
  -3   7  -1   56.23    3.45 
   4  -7   1   26.97    2.11 
   4  -7   1   29.68    2.18 
  -4  -7  -1   31.53    2.02 
   4   7   1   30.85    2.22 
   4   7   1   30.48    2.51 
   4   7   1   30.62    2.07 
  -4   7  -1   30.94    2.01 
   5  -7   1    3.61    1.12 
   5  -7   1    4.38    1.12 
   5  -7   1    5.83    0.90 
   5  -7   1    5.25    0.47 
   6  -7   1   11.33    1.35 
   6  -7   1   12.99    1.67 
   6  -7   1   11.46    0.80 
   6   7   1   11.55    0.76 
   6   7   1   11.68    1.84 
   6   7   1   11.17    1.34 
   6   7   1   11.22    0.78 
   6  -8  -1    4.79    0.81 
   6  -8  -1    3.44    1.22 
   6  -8  -1    2.48    0.87 
   6  -8  -1    4.76    0.55 
   6  -8  -1    4.73    0.62 
   6  -8  -1    4.20    0.44 
   6  -8  -1    4.34    0.44 
   6   8  -1    2.96    1.23 
   6   8  -1    2.74    1.05 
   5  -8  -1    4.94    1.20 
   5  -8  -1    4.49    1.08 
   5  -8  -1    2.95    1.33 
   5   8  -1    3.83    1.04 
   5   8  -1    3.31    0.98 
   5   8  -1    3.44    1.16 
   5   8  -1    3.88    0.44 
   4  -8  -1   78.33    4.77 
   4  -8  -1   78.42    5.04 
  -4  -8   1   79.12    4.84 
   4  -8  -1   77.33    4.93 
   4  -8  -1   79.89    4.69 
  -4   8   1   74.57    4.82 
   4   8  -1   72.36    4.90 
   4   8  -1   76.22    4.92 
   4   8  -1   72.03    5.20 
   3  -8  -1   20.38    1.75 
   3  -8  -1   21.25    1.70 
   3  -8  -1   21.69    1.67 
   3  -8  -1   21.63    1.56 
  -3  -8   1   22.90    1.59 
  -3  -8   1   20.32    1.81 
  -3  -8   1   19.18    1.72 
   3  -8  -1   20.52    1.69 
   3   8  -1   17.88    1.64 
   3   8  -1   17.69    1.67 
  -3   8   1   24.80    1.54 
  -3   8   1   23.62    1.77 
  -3   8   1   23.19    1.70 
   3   8  -1   21.43    1.56 
   3   8  -1   23.58    1.50 
   3   8  -1   25.84    1.86 
   3   8  -1   24.47    1.82 
   2  -8  -1  111.87    6.80 
  -2  -8   1  120.73    7.01 
   2  -8  -1  122.00    6.84 
   2  -8  -1  119.57    6.84 
  -2  -8   1  107.99    6.87 
   2  -8  -1  116.00    6.83 
   2  -8  -1  123.64    7.14 
  -2  -8   1  118.54    7.01 
  -2  -8   1  101.79    6.90 
   2  -8  -1  114.20    7.06 
  -2  -8   1  115.51    6.90 
   2  -8  -1  117.85    7.00 
  -2   8   1  105.68    6.85 
   2   8  -1  111.04    6.99 
   2   8  -1  115.21    7.04 
  -2   8   1  111.04    7.15 
  -2   8   1  105.22    6.93 
   2   8  -1  106.05    7.02 
   2   8  -1  101.96    7.01 
   2   8  -1  108.78    6.97 
  -2   8   1  117.00    7.03 
  -2   8   1  107.70    6.96 
   2   8  -1  111.28    7.06 
   1  -8  -1   25.74    1.85 
   1  -8  -1   26.07    1.81 
   1  -8  -1   29.21    2.30 
   1  -8  -1   25.50    1.98 
   1  -8  -1   28.26    1.85 
  -1  -8   1   26.87    1.84 
   1  -8  -1   27.07    1.86 
   1  -8  -1   25.48    2.34 
  -1  -8   1   26.36    1.96 
  -1  -8   1   26.30    1.96 
   1  -8  -1   26.47    2.27 
   1  -8  -1   27.50    2.02 
   1  -8  -1   26.58    1.85 
  -1  -8   1   28.28    1.84 
   1  -8  -1   26.49    2.14 
   1  -8  -1   27.75    1.86 
   1   8  -1   29.60    1.86 
  -1   8   1   29.14    1.81 
  -1   8   1   28.21    2.11 
  -1   8   1   29.64    1.97 
   1   8  -1   30.42    2.04 
  -1   8   1   28.99    1.95 
  -1   8   1   28.69    1.94 
   1   8  -1   29.71    1.87 
   1   8  -1   27.11    1.89 
   1   8  -1   27.27    1.85 
   1   8  -1   29.45    1.84 
   1   8  -1   29.44    1.99 
   1   8  -1   26.93    1.79 
   1   8  -1   28.46    1.82 
   1   8  -1   28.77    1.94 
  -1   8   1   33.48    2.10 
  -1   8   1   29.75    1.98 
   1   8  -1   30.13    2.14 
   1   8  -1   27.30    1.97 
   0  -8  -1   78.64    5.28 
   0  -8   1   88.45    5.15 
   0  -8  -1   82.16    5.14 
   0  -8   1   86.10    5.16 
   0  -8   1   84.84    5.37 
   0  -8   1   82.95    5.13 
   0  -8  -1   88.48    5.27 
   0  -8   1   85.75    5.12 
   0  -8   1   88.97    5.14 
   0  -8  -1   85.90    5.13 
   0  -8   1   85.23    5.13 
   0  -8  -1   83.62    5.24 
   0  -8   1   79.31    5.15 
   0  -8  -1   83.16    5.16 
   0  -8   1   85.13    5.15 
   0  -8   1   90.35    5.25 
   0  -8   1   86.31    5.18 
   0  -8  -1   81.01    5.12 
   0  -8  -1   82.40    5.16 
   0  -8  -1   82.30    5.38 
   0  -8   1   88.17    5.29 
   0  -8  -1   88.76    5.47 
   0   8   1   84.23    5.17 
   0   8   1   86.00    5.17 
   0   8   1   84.69    5.12 
   0   8  -1   74.56    5.18 
   0   8  -1   88.46    5.33 
   0   8   1   84.19    5.18 
   0   8  -1   76.03    5.18 
   0   8  -1   81.88    5.27 
   0   8   1   79.12    5.26 
   0   8  -1   83.79    5.30 
   0   8   1   84.09    5.26 
   0   8   1   88.21    5.24 
   0   8  -1   78.50    5.19 
   0   8  -1   84.72    5.22 
   0   8  -1   84.40    5.24 
   0   8  -1   83.22    5.13 
   0   8  -1   87.68    5.19 
   0   8  -1   80.71    5.12 
   0   8   1   85.42    5.13 
   0   8   1   79.38    5.18 
   0   8  -1   86.12    5.19 
   0   8  -1   86.22    5.13 
   0   8   1   82.64    5.12 
   0   8   1   83.43    5.17 
   0   8  -1   80.19    5.16 
   0   8   1   85.24    5.21 
   0   8   1   89.23    5.17 
   0   8   1   87.30    5.31 
  -1  -8  -1   27.45    1.96 
   1  -8   1   26.90    1.73 
   1  -8   1   27.34    1.87 
   1  -8   1   28.73    1.78 
  -1  -8  -1   28.77    1.90 
   1  -8   1   29.54    1.74 
   1  -8   1   25.21    1.75 
  -1  -8  -1   28.33    2.14 
  -1  -8  -1   28.37    1.90 
   1  -8   1   28.22    1.76 
   1  -8   1   27.21    2.03 
   1  -8   1   27.87    1.93 
  -1  -8  -1   28.05    1.78 
   1  -8   1   26.91    1.77 
   1   8   1   26.97    1.86 
  -1   8  -1   25.93    1.85 
  -1   8  -1   26.87    1.93 
   1   8   1   26.92    1.84 
  -1   8  -1   26.14    2.05 
   1   8   1   27.41    1.72 
  -1   8  -1   25.47    1.78 
   1   8   1   26.47    1.73 
   1   8   1   28.86    1.73 
   1   8   1   26.15    1.90 
   1   8   1   26.10    1.90 
   1   8   1   24.43    1.71 
   1   8   1   27.12    1.73 
   1   8   1   28.33    1.74 
   1   8   1   24.66    1.69 
   1   8   1   25.54    1.69 
  -2  -8  -1   98.74    6.47 
  -2  -8  -1  106.04    6.44 
  -2  -8  -1  103.04    6.42 
   2  -8   1  103.59    6.50 
   2  -8   1  101.27    6.43 
   2  -8   1  101.21    6.47 
  -2  -8  -1  100.16    6.33 
  -2   8  -1   98.35    6.39 
   2   8   1  106.45    6.44 
   2   8   1  108.09    6.47 
   2   8   1  108.49    6.50 
  -2   8  -1  107.46    6.32 
  -2   8  -1  109.59    6.41 
  -2   8  -1  106.03    6.48 
  -2   8  -1  100.86    6.36 
   2   8   1  101.39    6.54 
   2   8   1  107.66    6.41 
   2   8   1  101.76    6.42 
  -2   8  -1  102.24    6.62 
  -3  -8  -1   35.41    2.83 
   3  -8   1   41.10    2.68 
  -3  -8  -1   40.41    2.77 
   3  -8   1   39.64    2.58 
   3  -8   1   41.14    2.54 
   3  -8   1   40.99    2.69 
   3  -8   1   43.85    2.72 
  -3  -8  -1   43.30    2.60 
   3  -8   1   40.04    2.71 
  -3  -8  -1   42.25    2.73 
  -3   8  -1   40.18    2.59 
   3   8   1   39.74    2.99 
   3   8   1   38.81    2.88 
  -3   8  -1   40.87    2.77 
  -3   8  -1   40.47    2.71 
   4  -8   1   60.96    3.82 
  -4  -8  -1   59.62    3.75 
   4  -8   1   60.78    3.92 
   4   8   1   58.39    4.15 
   4   8   1   57.30    3.87 
   4   8   1   59.04    4.39 
   4   8   1   55.24    3.77 
  -4   8  -1   62.54    3.76 
   5  -8   1    3.42    0.45 
   5  -8   1    1.74    0.64 
   5  -8   1    2.14    0.86 
   5  -8   1    3.58    1.44 
   5   8   1    2.39    0.33 
   5   8   1    2.84    0.31 
   5   8   1    3.97    1.29 
   6  -8   1    2.73    1.25 
   6  -8   1    2.06    0.41 
   6  -8   1    0.84    0.91 
   6   8   1    3.78    1.06 
   6   8   1    2.02    0.68 
   6   8   1    3.23    1.47 
   6   8   1    1.73    0.33 
   6   8   1    2.32    0.31 
   6  -9  -1    3.25    1.21 
   6  -9  -1    2.52    0.53 
   6  -9  -1    3.13    0.40 
   6  -9  -1    4.12    0.64 
   6  -9  -1    2.33    1.24 
   6  -9  -1    1.52    0.78 
   6  -9  -1    4.05    0.66 
   6  -9  -1    1.86    0.44 
   6  -9  -1    3.64    0.75 
   6   9  -1    1.46    1.11 
   6   9  -1    2.81    1.02 
   5  -9  -1   18.21    2.01 
   5  -9  -1   19.87    2.01 
   5  -9  -1   20.68    1.71 
   5  -9  -1   19.43    1.42 
   5  -9  -1   17.65    1.44 
   5  -9  -1   20.76    1.78 
   5   9  -1   20.27    1.83 
   5   9  -1   23.28    1.76 
   5   9  -1   19.42    1.40 
   5   9  -1   20.46    1.41 
   5   9  -1   21.56    1.67 
   5   9  -1   22.83    1.33 
   4  -9  -1   13.14    1.18 
   4  -9  -1   13.13    1.04 
   4  -9  -1   13.19    1.46 
  -4  -9   1   13.34    1.24 
   4  -9  -1   14.02    1.38 
   4   9  -1   10.82    1.43 
   4   9  -1   14.49    1.32 
   4   9  -1   12.58    1.69 
  -4   9   1   14.35    1.17 
   3  -9  -1    6.04    1.00 
  -3  -9   1    7.13    0.95 
   3  -9  -1    5.46    0.96 
   3  -9  -1    5.29    0.79 
  -3  -9   1    6.48    0.83 
  -3  -9   1    5.18    1.15 
   3  -9  -1    5.49    0.98 
   3  -9  -1    6.04    0.99 
   3   9  -1    5.89    1.24 
  -3   9   1    5.99    1.01 
   3   9  -1    7.65    1.07 
  -3   9   1    6.41    0.70 
   3   9  -1    6.43    0.74 
  -3   9   1    6.58    0.97 
   3   9  -1    5.31    0.86 
   3   9  -1    6.28    1.06 
   3   9  -1    6.34    1.09 
   2  -9  -1   54.46    3.64 
   2  -9  -1   56.16    3.77 
   2  -9  -1   56.89    3.52 
  -2  -9   1   60.50    3.72 
  -2  -9   1   50.49    3.56 
   2  -9  -1   58.53    3.51 
   2  -9  -1   59.42    3.49 
  -2  -9   1   57.30    3.59 
  -2  -9   1   58.54    3.72 
   2  -9  -1   54.19    3.52 
  -2  -9   1   53.64    3.61 
   2  -9  -1   50.70    3.62 
   2  -9  -1   59.53    3.88 
   2   9  -1   54.98    3.78 
   2   9  -1   57.82    3.65 
   2   9  -1   54.90    3.74 
   2   9  -1   57.55    3.76 
   2   9  -1   59.85    3.81 
   2   9  -1   51.18    3.60 
  -2   9   1   61.41    3.68 
  -2   9   1   60.35    3.90 
  -2   9   1   50.59    3.53 
  -2   9   1   57.98    3.64 
  -2   9   1   60.68    3.75 
   2   9  -1   59.29    3.71 
  -1  -9   1   75.50    4.56 
   1  -9  -1   71.87    4.71 
  -1  -9   1   67.20    4.60 
   1  -9  -1   67.20    4.44 
   1  -9  -1   73.45    4.45 
   1  -9  -1   79.76    4.63 
  -1  -9   1   70.16    4.56 
   1  -9  -1   73.11    4.82 
   1  -9  -1   69.43    4.44 
   1  -9  -1   73.61    4.45 
   1  -9  -1   71.19    4.44 
  -1   9   1   64.50    4.55 
   1   9  -1   70.24    4.44 
   1   9  -1   75.60    4.56 
   1   9  -1   74.05    4.41 
   1   9  -1   70.76    4.42 
  -1   9   1   68.22    4.51 
  -1   9   1   71.10    4.42 
   1   9  -1   75.70    4.63 
   1   9  -1   72.48    4.56 
   1   9  -1   72.55    4.45 
   1   9  -1   72.13    4.69 
  -1   9   1   78.00    4.59 
   1   9  -1   74.67    4.46 
  -1   9   1   71.98    4.68 
  -1   9   1   60.89    4.43 
   1   9  -1   70.14    4.58 
   0  -9  -1   10.97    0.92 
   0  -9   1   10.74    1.13 
   0  -9  -1   12.14    0.88 
   0  -9   1   10.67    1.27 
   0  -9   1   11.01    0.89 
   0  -9  -1   12.59    1.21 
   0  -9  -1   10.37    1.45 
   0  -9   1   11.19    1.06 
   0  -9   1   11.31    0.87 
   0  -9   1   10.70    0.88 
   0  -9   1   11.36    0.86 
   0  -9  -1   10.83    1.11 
   0  -9   1   10.81    0.84 
   0  -9  -1   11.80    0.86 
   0  -9   1   10.12    0.89 
   0  -9  -1   10.72    1.08 
   0  -9  -1    9.96    0.84 
   0  -9   1   10.36    0.93 
   0  -9   1   11.31    1.07 
   0  -9  -1   10.63    1.40 
   0   9   1   11.60    0.94 
   0   9   1   11.62    1.05 
   0   9   1   10.43    1.03 
   0   9   1   10.16    0.84 
   0   9   1   10.54    1.03 
   0   9  -1   10.41    0.98 
   0   9   1   10.14    1.03 
   0   9   1   11.10    0.98 
   0   9  -1   10.90    0.84 
   0   9   1   11.26    1.16 
   0   9  -1   10.29    0.97 
   0   9  -1   10.74    0.91 
   0   9  -1   10.40    1.06 
   0   9  -1   11.36    1.09 
   0   9  -1    9.64    0.96 
   0   9  -1   10.44    0.98 
   0   9  -1   10.48    1.05 
   0   9  -1   10.46    1.13 
   0   9  -1   10.94    1.16 
   0   9   1   11.69    0.93 
   0   9  -1    9.98    0.82 
   0   9  -1   10.00    0.81 
   0   9   1   11.25    0.99 
   1  -9   1   43.29    2.91 
   1  -9   1   47.17    2.76 
  -1  -9  -1   45.37    3.10 
  -1  -9  -1   42.40    2.78 
  -1  -9  -1   44.30    2.87 
   1  -9   1   45.61    2.74 
   1  -9   1   41.70    2.73 
   1  -9   1   41.27    2.84 
  -1  -9  -1   42.28    2.74 
   1  -9   1   49.32    2.74 
   1  -9   1   41.22    3.00 
   1  -9   1   42.61    2.74 
  -1  -9  -1   45.66    2.87 
  -1   9  -1   40.63    2.88 
  -1   9  -1   45.86    2.84 
   1   9   1   42.02    2.92 
   1   9   1   37.54    2.67 
   1   9   1   43.46    2.71 
   1   9   1   40.99    2.82 
  -1   9  -1   40.27    2.99 
   1   9   1   44.27    2.72 
  -1   9  -1   42.40    2.77 
   1   9   1   42.58    2.86 
   1   9   1   46.83    2.72 
   1   9   1   44.76    2.71 
   1   9   1   41.94    2.68 
  -2  -9  -1   45.77    3.24 
   2  -9   1   51.91    3.26 
  -2  -9  -1   52.15    3.35 
   2  -9   1   45.73    3.29 
  -2  -9  -1   52.54    3.28 
  -2  -9  -1   49.91    3.16 
   2  -9   1   46.52    3.20 
   2  -9   1   50.14    3.37 
  -2   9  -1   50.56    3.51 
  -2   9  -1   44.12    3.16 
   2   9   1   54.81    3.28 
   2   9   1   50.74    3.28 
  -2   9  -1   50.13    3.14 
   2   9   1   51.32    3.32 
  -2   9  -1   45.70    3.22 
  -2   9  -1   52.81    3.34 
   2   9   1   46.77    3.21 
   2   9   1   51.34    3.41 
   2   9   1   49.46    3.26 
  -2   9  -1   52.27    3.25 
   2   9   1   52.99    3.35 
  -3  -9  -1    5.13    1.30 
   3  -9   1    3.10    0.59 
   3  -9   1    4.20    0.68 
  -3  -9  -1    4.91    0.86 
  -3  -9  -1    5.57    0.71 
   3  -9   1    4.44    0.80 
   3  -9   1    4.36    0.84 
  -3  -9  -1    3.41    0.83 
   3   9   1    3.63    1.28 
   3   9   1    3.84    1.07 
  -3   9  -1    3.85    0.63 
  -3   9  -1    4.38    1.07 
   3   9   1    3.09    0.56 
  -3   9  -1    3.68    1.17 
  -3   9  -1    2.84    0.82 
  -4  -9  -1   23.03    1.62 
   4  -9   1   23.12    1.92 
   4  -9   1   19.47    1.72 
  -4   9  -1   22.21    1.60 
   4   9   1   22.45    2.38 
   4   9   1   20.65    1.68 
   4   9   1   20.35    2.13 
   4   9   1   21.08    1.81 
   5  -9   1   11.98    1.21 
   5  -9   1   10.77    0.97 
   5  -9   1   11.09    1.39 
   5  -9   1   15.78    1.83 
   5  -9   1   13.24    1.22 
   5  -9   1   10.53    0.98 
   5   9   1   13.65    1.68 
   5   9   1   12.05    1.30 
   5   9   1   11.62    1.47 
   5   9   1   12.55    1.42 
   5   9   1   10.25    0.77 
   5   9   1   11.01    0.77 
   5   9   1   10.74    0.84 
   6  -9   1    4.21    1.36 
   6  -9   1    2.45    1.03 
   6  -9   1    4.25    0.47 
   6   9   1    3.97    0.36 
   6   9   1    4.40    0.41 
   6   9   1    4.41    1.06 
   6   9   1    2.80    0.71 
   6 -10  -1    1.74    0.41 
   6 -10  -1    0.83    0.73 
   6 -10  -1    2.44    0.64 
   6 -10  -1    2.45    0.37 
   6 -10  -1    1.96    0.55 
   6 -10  -1    0.60    0.96 
   6  10  -1    1.68    0.83 
   5 -10  -1    8.73    1.65 
   5 -10  -1    8.20    1.48 
   5 -10  -1    8.86    0.85 
   5 -10  -1    8.22    1.35 
   5 -10  -1    7.06    0.80 
   5 -10  -1    9.07    1.23 
   5  10  -1    8.69    1.08 
   5  10  -1    8.74    1.32 
   5  10  -1    6.09    0.90 
   5  10  -1    7.57    0.83 
   5  10  -1    9.62    1.08 
   5  10  -1    6.45    0.75 
   5  10  -1    8.54    1.17 
   5  10  -1    8.88    0.87 
   4 -10  -1   11.40    1.19 
   4 -10  -1   10.39    1.42 
  -4 -10   1    9.62    1.09 
   4 -10  -1    8.95    0.88 
   4 -10  -1    9.07    1.02 
   4  10  -1    8.21    1.31 
  -4  10   1    9.22    1.00 
   4  10  -1    7.71    1.23 
   4  10  -1    8.53    1.74 
   3 -10  -1    5.81    1.03 
  -3 -10   1    7.03    1.03 
   3 -10  -1    6.56    1.03 
   3 -10  -1    5.74    0.84 
   3 -10  -1    6.02    1.05 
  -3 -10   1    6.57    0.89 
   3 -10  -1    6.00    1.08 
  -3 -10   1    6.80    1.02 
  -3  10   1    6.77    1.03 
   3  10  -1    6.59    1.11 
   3  10  -1    6.37    0.76 
   3  10  -1    4.92    0.89 
   3  10  -1    7.28    1.04 
   3  10  -1    4.99    0.91 
   3  10  -1    6.18    1.00 
  -3  10   1    6.01    1.06 
  -3  10   1    6.61    0.77 
   3  10  -1    5.34    0.98 
   3  10  -1    7.01    1.13 
   2 -10  -1   16.04    1.13 
  -2 -10   1   19.12    1.47 
  -2 -10   1   18.37    1.54 
   2 -10  -1   16.28    1.47 
  -2 -10   1   19.19    1.40 
  -2 -10   1   17.98    1.53 
   2 -10  -1   17.77    1.27 
   2 -10  -1   17.06    1.29 
   2 -10  -1   17.26    1.60 
   2 -10  -1   16.64    1.28 
   2 -10  -1   17.16    1.51 
   2 -10  -1   16.74    1.73 
  -2  10   1   20.73    1.50 
   2  10  -1   18.25    1.49 
  -2  10   1   18.19    1.54 
   2  10  -1   18.44    1.54 
   2  10  -1   20.11    1.71 
  -2  10   1   17.15    1.74 
   2  10  -1   17.72    1.42 
   2  10  -1   17.96    1.59 
   2  10  -1   19.53    1.60 
   2  10  -1   21.21    1.73 
   1 -10  -1   69.17    4.43 
  -1 -10   1   71.95    4.55 
   1 -10  -1   70.10    4.43 
   1 -10  -1   67.75    4.43 
   1 -10  -1   71.81    4.73 
   1 -10  -1   74.16    4.44 
   1 -10  -1   62.61    4.59 
   1 -10  -1   65.37    4.79 
  -1 -10   1   70.33    4.48 
  -1 -10   1   75.99    4.57 
  -1  10   1   65.43    4.49 
   1  10  -1   73.40    4.71 
   1  10  -1   67.88    4.42 
  -1  10   1   67.71    4.67 
   1  10  -1   69.86    4.44 
   1  10  -1   73.70    4.38 
   1  10  -1   79.90    4.42 
  -1  10   1   78.21    4.51 
  -1  10   1   72.19    4.57 
   1  10  -1   72.79    4.63 
   1  10  -1   69.44    4.43 
   1  10  -1   71.45    4.54 
  -1  10   1   75.20    4.56 
   0 -10   1   10.36    1.08 
   0 -10  -1   10.72    0.87 
   0 -10   1   10.18    0.90 
   0 -10  -1   10.77    1.14 
   0 -10  -1   10.88    1.15 
   0 -10  -1    9.63    0.93 
   0 -10   1    9.36    0.99 
   0 -10   1   10.00    1.09 
   0 -10   1   10.78    1.17 
   0 -10   1    9.55    0.85 
   0 -10  -1   11.93    1.44 
   0 -10   1   11.30    1.31 
   0 -10   1   10.80    0.95 
   0 -10  -1   10.72    0.87 
   0  10  -1    9.40    1.02 
   0  10   1   10.69    1.07 
   0  10   1    9.68    1.02 
   0  10   1   11.38    1.06 
   0  10   1   12.04    0.99 
   0  10  -1   11.71    1.09 
   0  10   1    8.76    0.83 
   0  10  -1   11.50    1.22 
   0  10  -1   10.83    1.03 
   0  10   1   11.36    0.95 
   0  10   1   11.88    1.19 
   0  10   1   11.41    0.98 
   0  10  -1   11.27    1.14 
   0  10   1   11.76    1.06 
   0  10   1   10.71    1.06 
   0  10  -1    9.71    0.83 
   0  10  -1   10.18    1.07 
   0  10  -1   10.08    1.01 
   0  10  -1   11.35    1.20 
   0  10  -1   10.24    0.99 
   1 -10   1  131.00    7.91 
  -1 -10  -1  131.69    8.02 
  -1 -10  -1  118.12    7.94 
   1 -10   1  140.76    7.91 
   1 -10   1  114.03    7.88 
   1 -10   1  137.43    8.17 
   1 -10   1  126.33    7.88 
  -1 -10  -1  130.06    8.01 
   1 -10   1  130.93    8.08 
   1 -10   1  121.73    7.88 
  -1 -10  -1  137.58    8.24 
  -1 -10  -1  120.40    7.91 
   1  10   1  136.54    8.01 
  -1  10  -1  126.74    7.98 
   1  10   1  136.09    7.88 
  -1  10  -1  140.66    8.17 
  -1  10  -1  118.07    7.96 
   1  10   1  126.13    7.87 
  -1  10  -1  142.90    8.06 
   1  10   1  130.90    8.05 
   1  10   1  120.06    7.85 
   1  10   1  137.69    8.10 
   1  10   1  131.18    7.87 
   2 -10   1   34.07    2.24 
  -2 -10  -1   34.25    2.19 
   2 -10   1   34.52    2.35 
  -2 -10  -1   33.25    2.25 
   2 -10   1   32.66    2.23 
  -2 -10  -1   34.73    2.33 
  -2 -10  -1   32.31    2.28 
   2 -10   1   36.25    2.44 
   2 -10   1   31.87    2.27 
   2  10   1   32.93    2.36 
   2  10   1   32.80    2.49 
  -2  10  -1   34.28    2.59 
   2  10   1   32.73    2.31 
  -2  10  -1   29.50    2.26 
  -2  10  -1   32.19    2.36 
   2  10   1   31.25    2.33 
  -2  10  -1   29.76    2.26 
   2  10   1   28.15    2.22 
   2  10   1   32.82    2.36 
   2  10   1   30.24    2.30 
   3 -10   1   10.95    0.91 
  -3 -10  -1   11.54    1.02 
   3 -10   1   10.07    1.10 
   3 -10   1    9.99    1.04 
   3 -10   1   11.05    0.99 
  -3 -10  -1   10.82    1.16 
  -3  10  -1   11.05    1.52 
   3  10   1   10.16    0.91 
   3  10   1   11.66    1.65 
   3  10   1   10.70    1.46 
   3  10   1   11.03    0.79 
  -3  10  -1   10.36    1.14 
   3  10   1   10.21    1.12 
  -3  10  -1   10.65    0.95 
  -3  10  -1    9.06    1.16 
   3  10   1   10.33    1.14 
   4 -10   1   17.61    1.45 
  -4 -10  -1   15.36    1.33 
   4 -10   1   16.44    1.61 
   4  10   1   14.40    1.96 
   4  10   1   15.61    1.44 
   4  10   1   14.90    1.51 
  -4  10  -1   14.52    1.30 
   4  10   1   17.79    2.12 
   5 -10   1    7.13    1.50 
   5 -10   1    9.06    1.11 
   5 -10   1    8.29    1.33 
   5 -10   1    7.87    0.86 
   5 -10   1    8.63    0.87 
   5 -10   1    6.96    0.83 
   5 -10   1    9.45    1.34 
   5  10   1    9.14    1.37 
   5  10   1    8.48    1.30 
   5  10   1    8.71    1.77 
   5  10   1    8.06    0.60 
   5  10   1    7.95    0.61 
   5  10   1    8.39    1.01 
   5  10   1    8.45    1.02 
   6 -10   1    0.15    0.69 
   6 -10   1    0.09    0.87 
   6 -10   1    1.68    0.39 
   6  10   1    1.12    0.27 
   6  10   1   -0.03    0.67 
   6 -11  -1    5.07    0.69 
   6 -11  -1    5.33    0.46 
   6 -11  -1    3.49    1.11 
   6 -11  -1    6.71    1.38 
   6 -11  -1    4.82    0.57 
   6 -11  -1    4.54    0.60 
   6  11  -1    4.35    1.21 
   5 -11  -1    7.34    1.29 
   5 -11  -1    8.35    1.28 
   5 -11  -1    7.39    0.81 
   5 -11  -1    7.49    1.39 
   5 -11  -1    5.56    1.51 
   5 -11  -1    7.61    0.86 
   5  11  -1    7.16    0.91 
   5  11  -1    6.33    0.77 
   5  11  -1    7.96    1.15 
   5  11  -1    5.65    1.08 
   5  11  -1    9.82    1.16 
   5  11  -1    7.19    0.75 
   5  11  -1    9.89    1.45 
   5  11  -1    7.21    0.74 
   4 -11  -1    8.99    1.55 
   4 -11  -1    8.11    0.83 
   4 -11  -1    7.73    0.98 
  -4 -11   1    6.67    1.05 
   4 -11  -1    7.21    1.21 
   4 -11  -1    9.07    1.27 
   4  11  -1    6.76    1.30 
   4  11  -1    6.66    1.18 
   4  11  -1    6.31    1.40 
   4  11  -1    7.59    1.65 
   3 -11  -1   13.65    1.31 
  -3 -11   1   13.81    1.23 
  -3 -11   1   12.80    1.36 
   3 -11  -1   13.29    1.26 
  -3 -11   1   12.38    1.34 
   3 -11  -1   13.67    1.41 
   3 -11  -1   12.48    1.25 
   3 -11  -1   14.88    1.32 
   3 -11  -1   13.44    1.35 
   3  11  -1   16.00    1.40 
   3  11  -1   14.26    1.34 
   3  11  -1   10.98    1.24 
   3  11  -1   12.53    1.30 
   3  11  -1   11.58    1.27 
  -3  11   1   13.25    1.35 
   3  11  -1   12.69    1.12 
  -3  11   1   12.68    1.40 
  -3  11   1   10.74    1.57 
   3  11  -1   10.53    1.43 
   2 -11  -1   35.43    2.34 
  -2 -11   1   37.40    2.44 
  -2 -11   1   37.89    2.60 
  -2 -11   1   36.22    2.49 
   2 -11  -1   35.02    2.50 
   2 -11  -1   34.24    2.21 
   2 -11  -1   33.45    2.63 
   2 -11  -1   36.06    2.80 
   2 -11  -1   34.41    2.50 
  -2 -11   1   36.15    2.58 
   2 -11  -1   36.19    2.34 
   2 -11  -1   34.40    2.36 
   2 -11  -1   32.76    2.61 
  -2  11   1   39.94    2.83 
   2  11  -1   37.21    2.55 
   2  11  -1   37.13    2.60 
   2  11  -1   36.00    2.47 
   2  11  -1   30.72    2.60 
   2  11  -1   37.91    2.48 
  -2  11   1   38.61    2.57 
  -2  11   1   37.13    2.61 
  -2  11   1   40.01    2.53 
   2  11  -1   37.28    2.73 
   2  11  -1   38.04    2.73 
   1 -11  -1  148.34    9.56 
  -1 -11   1  159.01    9.68 
   1 -11  -1  144.86    9.54 
  -1 -11   1  140.73    9.58 
   1 -11  -1  156.36    9.56 
   1 -11  -1  139.57    9.54 
   1 -11  -1  162.87    9.76 
   1 -11  -1  168.61    9.95 
   1 -11  -1  159.76    9.85 
  -1  11   1  159.22    9.62 
  -1  11   1  158.99    9.82 
   1  11  -1  158.31    9.54 
   1  11  -1  160.73    9.50 
   1  11  -1  153.29    9.53 
   1  11  -1  166.51    9.57 
  -1  11   1  148.82    9.61 
   1  11  -1  156.07    9.82 
   1  11  -1  158.41    9.76 
   1  11  -1  163.10    9.66 
  -1  11   1  168.42    9.73 
   1  11  -1  163.70    9.56 
   0 -11  -1   74.48    4.80 
   0 -11   1   77.34    4.98 
   0 -11  -1   68.49    4.66 
   0 -11   1   77.48    4.66 
   0 -11  -1   65.22    4.63 
   0 -11   1   74.91    4.82 
   0 -11   1   72.76    4.79 
   0 -11  -1   76.58    4.83 
   0 -11  -1   81.33    5.07 
   0 -11  -1   75.56    4.78 
   0  11  -1   79.03    4.88 
   0  11  -1   75.50    4.76 
   0  11  -1   75.25    4.81 
   0  11  -1   69.47    4.78 
   0  11   1   80.19    4.88 
   0  11  -1   72.09    4.71 
   0  11  -1   73.23    4.70 
   0  11   1   73.47    4.69 
   0  11   1   75.52    4.68 
   0  11   1   77.41    4.92 
   0  11   1   79.12    4.68 
   0  11   1   75.91    4.71 
   1 -11   1   81.56    4.94 
   1 -11   1   88.73    4.98 
  -1 -11  -1   78.20    4.98 
  -1 -11  -1   81.93    5.03 
   1 -11   1   88.48    4.96 
   1 -11   1   79.13    5.16 
   1 -11   1   82.67    4.96 
   1 -11   1   67.58    4.94 
   1 -11   1   83.14    5.27 
  -1 -11  -1   84.79    5.36 
  -1 -11  -1   82.39    5.10 
  -1 -11  -1   82.55    5.11 
  -1  11  -1   74.78    5.11 
  -1  11  -1   80.38    5.07 
   1  11   1   79.45    4.92 
   1  11   1   77.84    5.16 
  -1  11  -1   76.08    5.23 
   1  11   1   78.50    4.92 
  -1  11  -1   73.94    5.03 
   1  11   1   75.57    5.05 
   1  11   1   83.82    4.93 
   1  11   1   79.44    4.90 
   2 -11   1   32.80    2.43 
   2 -11   1   34.79    2.42 
   2 -11   1   33.13    2.49 
  -2 -11  -1   36.35    2.48 
  -2 -11  -1   35.28    2.40 
  -2 -11  -1   38.24    2.52 
   2 -11   1   35.98    2.60 
  -2 -11  -1   34.98    2.32 
   2 -11   1   36.64    2.39 
   2  11   1   29.40    2.45 
   2  11   1   29.34    2.43 
   2  11   1   39.42    2.68 
   2  11   1   37.26    2.53 
  -2  11  -1   35.24    2.42 
  -2  11  -1   32.27    2.27 
  -2  11  -1   36.09    2.75 
   2  11   1   33.25    2.39 
  -2  11  -1   36.97    2.54 
   2  11   1   35.22    2.47 
  -2  11  -1   32.00    2.40 
   2  11   1   34.88    2.50 
   3 -11   1    6.90    0.87 
   3 -11   1    6.45    0.77 
  -3 -11  -1    7.16    0.88 
   3 -11   1    5.51    0.87 
  -3 -11  -1    7.20    1.04 
   3 -11   1    6.93    0.99 
   3  11   1    6.60    0.78 
  -3  11  -1    5.05    1.32 
   3  11   1    6.81    1.22 
   3  11   1    7.40    1.03 
  -3  11  -1    6.32    1.01 
   3  11   1    7.82    0.67 
   3  11   1    5.83    1.02 
   3  11   1    5.81    1.00 
  -3  11  -1    3.93    0.99 
   3  11   1    6.80    1.59 
  -3  11  -1    7.76    0.79 
   4 -11   1    6.35    1.28 
  -4 -11  -1    6.20    0.93 
   4 -11   1    6.85    1.11 
   4  11   1    4.92    1.77 
  -4  11  -1    7.56    0.87 
   4  11   1    5.00    1.26 
   4  11   1    6.56    1.16 
   5 -11   1   12.81    1.43 
   5 -11   1   13.51    1.11 
   5 -11   1   13.50    1.46 
   5 -11   1   12.37    1.32 
   5 -11   1   13.95    1.75 
   5 -11   1   12.16    1.10 
   5 -11   1   11.97    1.07 
   5  11   1   13.07    1.35 
   5  11   1   14.26    0.88 
   5  11   1   11.94    1.06 
   5  11   1   15.44    1.68 
   5  11   1   13.50    0.88 
   5  11   1   13.43    1.40 
   5  11   1   13.61    1.19 
   6 -11   1    2.08    0.39 
   6 -11   1    1.36    0.64 
   6 -11   1    2.54    0.94 
   6  11   1    1.89    0.66 
   6 -12  -1    0.58    0.24 
   6 -12  -1    0.45    0.38 
   6 -12  -1    0.70    0.37 
   6 -12  -1    0.15    0.86 
   6 -12  -1   -0.20    0.68 
   6 -12  -1    0.35    0.29 
   6  12  -1   -0.44    0.72 
   5 -12  -1   13.69    1.40 
   5 -12  -1   14.97    1.51 
   5 -12  -1   13.73    1.14 
   5 -12  -1   16.75    1.73 
   5 -12  -1   14.28    1.09 
   5 -12  -1   15.44    1.79 
   5  12  -1   13.58    1.14 
   5  12  -1   14.78    1.36 
   5  12  -1   12.51    1.46 
   5  12  -1   13.58    1.13 
   5  12  -1   15.49    1.70 
   5  12  -1   14.14    1.07 
   5  12  -1   13.89    1.12 
   4 -12  -1   37.20    2.62 
   4 -12  -1   37.00    2.82 
  -4 -12   1   39.46    2.72 
   4 -12  -1   37.00    2.94 
   4 -12  -1   40.44    2.75 
   4 -12  -1   32.77    3.18 
   4 -12  -1   39.13    2.51 
  -4  12   1   36.59    3.02 
   4  12  -1   42.25    2.68 
   4  12  -1   40.33    2.82 
   4  12  -1   43.69    2.77 
   3 -12  -1   22.72    1.76 
  -3 -12   1   22.27    1.77 
   3 -12  -1   21.21    1.89 
   3 -12  -1   20.55    1.70 
   3 -12  -1   18.53    1.85 
   3 -12  -1   20.17    1.65 
  -3 -12   1   20.46    1.63 
   3 -12  -1   20.30    1.75 
   3  12  -1   21.56    1.71 
  -3  12   1   21.81    1.86 
  -3  12   1   20.34    1.84 
   3  12  -1   20.00    1.66 
   3  12  -1   21.96    1.74 
  -3  12   1   15.57    1.97 
   3  12  -1   20.50    1.54 
   3  12  -1   20.14    1.65 
   3  12  -1   19.77    1.81 
  -3  12   1   20.83    1.78 
   3  12  -1   20.91    1.87 
   3  12  -1   19.19    1.68 
   2 -12  -1   21.08    1.61 
  -2 -12   1   20.70    1.66 
   2 -12  -1   19.62    1.73 
  -2 -12   1   19.29    1.52 
   2 -12  -1   17.22    1.59 
  -2 -12   1   20.47    1.59 
   2 -12  -1   19.59    1.41 
   2 -12  -1   19.01    1.70 
  -2 -12   1   19.36    1.66 
   2 -12  -1   20.50    1.38 
   2 -12  -1   20.07    1.41 
   2 -12  -1   19.66    1.21 
   2 -12  -1   20.44    1.92 
   2  12  -1   16.51    1.54 
  -2  12   1   18.67    1.60 
   2  12  -1   19.58    1.89 
   2  12  -1   18.40    1.65 
   2  12  -1   17.16    1.81 
   2  12  -1   16.59    1.65 
  -2  12   1   18.70    1.60 
  -2  12   1   16.85    1.65 
  -2  12   1   17.71    1.88 
   2  12  -1   19.39    1.56 
   2  12  -1   17.49    1.73 
   1 -12  -1   23.75    1.84 
   1 -12  -1   22.39    1.81 
  -1 -12   1   26.39    1.92 
   1 -12  -1   26.62    2.15 
   1 -12  -1   25.58    1.70 
  -1 -12   1   24.35    1.78 
   1 -12  -1   26.40    1.70 
   1 -12  -1   22.31    2.01 
   1 -12  -1   27.22    1.72 
   1 -12  -1   21.77    1.89 
   1 -12  -1   23.04    1.68 
   1  12  -1   23.82    1.66 
   1  12  -1   22.79    1.69 
   1  12  -1   23.80    1.72 
   1  12  -1   23.10    1.67 
  -1  12   1   20.69    1.83 
   1  12  -1   22.31    1.65 
   1  12  -1   22.13    1.92 
  -1  12   1   21.06    1.80 
   1  12  -1   23.50    1.60 
  -1  12   1   22.64    2.01 
  -1  12   1   24.08    1.81 
   1  12  -1   21.34    1.73 
   1  12  -1   20.02    1.75 
   1  12  -1   22.23    1.83 
   0 -12   1   48.09    3.24 
   0 -12  -1   47.88    3.21 
   0 -12  -1   49.58    3.11 
   0 -12  -1   49.96    3.29 
   0 -12  -1   48.14    3.26 
   0 -12  -1   46.54    3.53 
   0 -12   1   45.18    3.19 
   0 -12   1   48.70    3.08 
   0 -12   1   45.80    3.26 
   0  12  -1   46.83    3.21 
   0  12   1   49.11    3.16 
   0  12  -1   47.00    3.19 
   0  12   1   48.63    3.12 
   0  12   1   51.32    3.34 
   0  12  -1   44.85    3.18 
   0  12  -1   50.38    3.34 
   0  12  -1   46.30    3.33 
   0  12  -1   48.50    3.14 
   0  12  -1   46.98    3.25 
   0  12   1   50.12    3.11 
   0  12   1   50.06    3.14 
  -1 -12  -1   36.30    2.89 
   1 -12   1   33.61    2.48 
   1 -12   1   31.79    2.39 
  -1 -12  -1   35.64    2.57 
  -1 -12  -1   37.48    2.61 
   1 -12   1   39.93    2.79 
  -1 -12  -1   33.52    2.51 
   1 -12   1   31.79    2.59 
   1 -12   1   37.55    2.40 
   1 -12   1   30.59    2.36 
   1 -12   1   32.69    2.48 
   1 -12   1   33.29    2.39 
   1  12   1   37.89    2.50 
   1  12   1   40.02    2.69 
  -1  12  -1   35.44    2.52 
   1  12   1   37.91    2.34 
   1  12   1   33.94    2.43 
   1  12   1   38.82    2.37 
  -1  12  -1   39.95    2.58 
   1  12   1   39.36    2.38 
  -1  12  -1   41.21    2.81 
   1  12   1   38.63    2.36 
  -1  12  -1   38.84    2.63 
   1  12   1   36.92    2.52 
   1  12   1   37.68    2.51 
   2 -12   1    7.72    1.16 
  -2 -12  -1    9.16    1.14 
  -2 -12  -1    9.18    1.13 
   2 -12   1    8.32    1.09 
   2 -12   1    8.46    1.12 
  -2 -12  -1   11.31    1.00 
   2 -12   1    9.71    1.10 
   2 -12   1    9.53    1.29 
  -2 -12  -1    9.21    1.23 
  -2  12  -1    9.97    1.21 
   2  12   1    6.58    1.10 
  -2  12  -1    9.19    1.42 
   2  12   1    8.37    1.09 
  -2  12  -1    8.33    1.14 
   2  12   1    9.31    1.25 
   2  12   1   12.74    1.51 
  -2  12  -1   10.41    1.11 
   2  12   1    9.82    1.09 
   2  12   1    8.87    1.17 
   2  12   1    6.70    1.11 
   3 -12   1   36.60    2.52 
   3 -12   1   36.76    2.57 
   3 -12   1   34.77    2.51 
   3 -12   1   37.33    2.44 
   3 -12   1   37.29    2.38 
  -3 -12  -1   31.38    2.60 
   3 -12   1   38.15    2.44 
  -3 -12  -1   35.95    2.47 
   3 -12   1   34.25    2.62 
   3  12   1   37.16    2.59 
   3  12   1   36.99    2.53 
  -3  12  -1   42.50    3.16 
   3  12   1   41.28    3.01 
  -3  12  -1   38.01    2.58 
   3  12   1   36.16    2.32 
  -3  12  -1   34.72    2.41 
   3  12   1   35.53    2.82 
   3  12   1   36.23    2.53 
  -3  12  -1   32.60    2.66 
   3  12   1   36.91    2.62 
  -3  12  -1   33.82    2.93 
   3  12   1   34.92    2.49 
   4 -12   1   26.37    2.61 
   4 -12   1   29.62    2.32 
   4 -12   1   29.28    1.93 
   4 -12   1   29.47    2.12 
  -4 -12  -1   28.02    2.09 
   4  12   1   28.65    2.26 
   4  12   1   27.35    2.81 
   4  12   1   28.14    2.20 
  -4  12  -1   29.09    2.05 
   5 -12   1   13.20    1.43 
   5 -12   1   12.08    1.04 
   5 -12   1   11.75    1.00 
   5 -12   1    9.70    1.64 
   5 -12   1   13.31    1.28 
   5 -12   1   12.52    1.19 
   5 -12   1   12.16    1.02 
   5  12   1   10.66    0.97 
   5  12   1   11.39    1.28 
   5  12   1   10.29    0.80 
   5  12   1   10.75    0.79 
   5  12   1   12.25    0.97 
   5  12   1   12.80    1.16 
   5  12   1   11.97    1.37 
   5  12   1   14.04    1.65 
   6 -12   1    0.20    0.81 
   6 -12   1    0.41    0.24 
   6 -12   1    0.34    0.33 
   6 -12   1    0.24    0.58 
   6  12   1   -0.17    0.57 
   6  12   1    0.39    0.23 
   6 -13  -1    1.66    0.66 
   6 -13  -1    0.72    0.76 
   6 -13  -1    3.25    0.55 
   6 -13  -1    2.87    0.44 
   6 -13  -1    2.75    0.50 
   6 -13  -1    2.40    0.36 
   6  13  -1    1.12    0.57 
   5 -13  -1    2.07    1.02 
   5 -13  -1    2.30    0.65 
   5 -13  -1    1.72    0.53 
   5 -13  -1    1.57    0.87 
   5 -13  -1    1.79    0.80 
   5 -13  -1    1.27    0.93 
   5  13  -1    1.51    0.87 
   5  13  -1    1.49    0.47 
   5  13  -1    2.15    0.56 
   5  13  -1    1.31    0.66 
   5  13  -1    1.14    1.06 
   5  13  -1    1.76    0.62 
   5  13  -1    2.00    0.63 
   4 -13  -1    3.10    1.16 
   4 -13  -1    3.04    0.87 
   4 -13  -1    3.41    1.11 
   4 -13  -1    2.48    1.23 
   4 -13  -1    3.17    1.06 
  -4 -13   1    2.53    0.99 
   4 -13  -1    3.09    0.74 
   4  13  -1    3.83    1.12 
  -4  13   1    2.69    1.22 
   4  13  -1    3.72    1.25 
   4  13  -1    3.92    1.05 
  -4  13   1    4.09    1.67 
   3 -13  -1    5.57    1.42 
   3 -13  -1    6.76    1.17 
  -3 -13   1    7.42    1.13 
  -3 -13   1    6.51    1.03 
   3 -13  -1    6.92    1.13 
   3 -13  -1    7.17    1.24 
   3 -13  -1    6.74    1.10 
   3 -13  -1    7.52    1.16 
   3  13  -1    6.82    1.25 
  -3  13   1    3.08    1.35 
   3  13  -1    7.86    1.06 
  -3  13   1    5.89    1.19 
  -3  13   1    3.82    1.27 
   3  13  -1    6.51    1.09 
   3  13  -1    6.71    0.96 
   3  13  -1    6.87    1.30 
  -3  13   1    7.42    1.85 
   3  13  -1    7.33    0.95 
   3  13  -1    6.44    1.09 
   2 -13  -1    4.55    0.99 
   2 -13  -1    5.94    1.28 
   2 -13  -1    3.90    0.71 
   2 -13  -1    3.88    1.08 
  -2 -13   1    4.23    0.95 
   2 -13  -1    3.78    1.17 
   2 -13  -1    3.76    1.02 
   2 -13  -1    4.38    0.46 
   2 -13  -1    4.27    0.71 
   2 -13  -1    4.29    0.71 
   2 -13  -1    4.84    1.02 
   2 -13  -1    4.06    0.91 
  -2  13   1    4.87    1.03 
   2  13  -1    5.04    1.28 
   2  13  -1    5.80    1.10 
   2  13  -1    4.91    0.98 
   2  13  -1    4.64    1.01 
  -2  13   1    4.02    0.98 
  -2  13   1    5.33    1.27 
  -2  13   1    2.82    0.83 
   2  13  -1    4.78    0.93 
   1 -13  -1   28.45    2.10 
   1 -13  -1   28.63    2.10 
  -1 -13   1   32.16    2.22 
   1 -13  -1   30.70    2.10 
   1 -13  -1   27.99    2.18 
   1 -13  -1   28.74    2.23 
  -1 -13   1   32.97    2.36 
  -1 -13   1   33.12    2.32 
   1 -13  -1   30.59    2.56 
   1  13  -1   32.38    2.10 
   1  13  -1   28.99    2.07 
  -1  13   1   30.63    2.30 
   1  13  -1   32.46    2.24 
  -1  13   1   30.13    2.23 
   1  13  -1   29.65    2.24 
   1  13  -1   30.63    2.50 
   1  13  -1   29.05    2.20 
   1  13  -1   29.93    2.38 
   1  13  -1   28.04    2.34 
  -1  13   1   30.21    2.22 
   1  13  -1   28.23    2.06 
  -1  13   1   28.08    2.27 
  -1  13   1   34.68    2.50 
   1  13  -1   32.67    2.13 
   1  13  -1   31.79    2.01 
   1  13  -1   31.39    2.13 
   0 -13   1   62.99    3.95 
   0 -13   1   57.46    4.03 
   0 -13  -1   64.55    3.99 
   0 -13  -1   64.55    4.43 
   0 -13   1   59.98    4.13 
   0 -13  -1   65.88    4.18 
   0 -13  -1   65.50    4.15 
   0 -13   1   59.48    4.05 
   0 -13  -1   62.98    4.07 
   0  13  -1   59.88    3.94 
   0  13   1   62.49    4.07 
   0  13   1   63.03    4.00 
   0  13  -1   63.14    4.07 
   0  13  -1   65.02    4.20 
   0  13   1   60.37    4.04 
   0  13   1   58.29    4.01 
   0  13  -1   60.01    4.21 
   0  13  -1   65.73    4.21 
   0  13  -1   66.12    4.02 
   0  13   1   68.83    4.23 
   0  13  -1   52.87    4.02 
   0  13   1   62.83    4.00 
   0  13   1   65.87    3.97 
   1 -13   1   16.08    1.64 
   1 -13   1   17.44    1.36 
   1 -13   1   18.83    1.62 
   1 -13   1   16.39    1.36 
   1 -13   1   18.66    1.53 
   1 -13   1   18.61    1.36 
  -1 -13  -1   19.70    1.64 
   1 -13   1   19.01    1.34 
  -1 -13  -1   18.15    1.96 
   1 -13   1   16.78    1.50 
  -1 -13  -1   19.77    1.60 
   1 -13   1   19.38    1.15 
  -1 -13  -1   18.65    1.54 
   1 -13   1   17.69    1.78 
   1  13   1   16.53    1.33 
  -1  13  -1   17.44    1.54 
   1  13   1   18.08    1.38 
   1  13   1   15.87    1.42 
   1  13   1   16.21    1.66 
  -1  13  -1   17.23    1.75 
   1  13   1   17.30    1.67 
   1  13   1   16.33    1.45 
   1  13   1   17.69    1.30 
   1  13   1   18.33    1.29 
  -1  13  -1   16.12    1.52 
  -1  13  -1   16.78    1.61 
   1  13   1   16.02    1.53 
  -2 -13  -1    3.29    0.84 
  -2 -13  -1    4.06    1.01 
   2 -13   1    3.90    0.66 
   2 -13   1    4.36    0.79 
  -2 -13  -1    3.20    0.97 
   2 -13   1    6.70    1.62 
   2 -13   1    3.99    1.00 
   2 -13   1    3.50    1.03 
   2 -13   1    4.06    1.10 
   2 -13   1    3.76    0.89 
   2 -13   1    4.74    0.95 
  -2  13  -1    4.80    1.06 
  -2  13  -1    4.03    0.98 
   2  13   1    5.95    1.44 
  -2  13  -1    5.52    1.26 
   2  13   1    3.81    1.02 
   2  13   1    5.30    1.12 
   2  13   1    3.76    0.98 
   2  13   1    3.63    1.04 
   3 -13   1    4.78    1.24 
  -3 -13  -1    5.19    0.90 
   3 -13   1    5.51    0.80 
   3 -13   1    4.65    0.91 
   3 -13   1    4.18    0.97 
   3 -13   1    4.63    1.05 
   3 -13   1    5.46    1.56 
   3 -13   1    5.78    0.86 
   3  13   1    4.49    1.20 
   3  13   1    5.02    0.75 
   3  13   1    3.80    1.30 
   3  13   1    7.56    1.69 
   3  13   1    5.13    1.04 
   3  13   1    3.74    0.97 
  -3  13  -1    3.70    1.21 
  -3  13  -1    5.62    1.07 
   3  13   1    4.72    0.95 
  -3  13  -1    2.61    1.32 
   3  13   1    4.26    1.04 
   4 -13   1    6.22    0.82 
   4 -13   1    4.63    1.24 
  -4 -13  -1    5.35    1.00 
   4 -13   1    7.28    1.17 
   4 -13   1    6.08    1.25 
   4 -13   1    4.22    0.54 
   4 -13   1    6.42    0.52 
   4  13   1    6.42    1.27 
  -4  13  -1    3.43    0.96 
   4  13   1    4.56    1.87 
   4  13   1    4.76    1.25 
   5 -13   1    2.29    0.97 
   5 -13   1    3.18    0.95 
   5 -13   1    2.38    0.65 
   5 -13   1    2.60    0.68 
   5 -13   1    3.51    0.99 
   5 -13   1    2.15    0.71 
   5 -13   1    1.52    0.96 
   5  13   1    2.00    0.41 
   5  13   1    1.78    0.63 
   5  13   1    1.73    0.47 
   5  13   1    3.29    0.90 
   5  13   1    2.57    1.09 
   5  13   1    2.06    0.37 
   5  13   1    2.79    0.69 
   6 -13   1    1.98    0.48 
   6 -13   1    1.79    0.82 
   6 -13   1    2.13    0.81 
   6 -13   1    2.10    0.37 
   6  13   1    2.61    0.32 
   6  13   1    1.94    0.58 
   6 -14  -1    9.08    0.71 
   6 -14  -1    7.75    0.66 
   6 -14  -1    6.71    0.98 
   6 -14  -1    8.50    0.67 
   6  14  -1    5.14    0.94 
   5 -14  -1    3.48    0.73 
   5 -14  -1    3.97    1.11 
   5 -14  -1    4.75    1.31 
   5 -14  -1    3.46    1.21 
   5 -14  -1    3.24    0.69 
   5 -14  -1    0.93    1.00 
   5  14  -1    3.76    0.60 
   5  14  -1    3.57    0.68 
   5  14  -1    3.54    0.74 
   5  14  -1    3.85    0.94 
   5  14  -1    3.51    0.66 
   5  14  -1    4.05    1.04 
   5  14  -1    2.35    0.88 
   4 -14  -1    9.51    0.98 
   4 -14  -1    9.95    1.57 
   4 -14  -1    7.90    1.30 
   4 -14  -1    9.94    1.12 
   4 -14  -1    9.88    1.67 
   4 -14  -1    9.06    1.44 
  -4 -14   1    6.40    1.19 
  -4  14   1    8.54    2.01 
  -4  14   1   10.23    1.41 
   4  14  -1    9.33    1.25 
   4  14  -1   11.01    1.49 
   4  14  -1   10.20    1.39 
   3 -14  -1    0.99    1.00 
   3 -14  -1    2.73    1.04 
   3 -14  -1    1.51    0.84 
   3 -14  -1    1.58    0.86 
   3 -14  -1    2.17    0.94 
  -3  14   1    0.40    1.19 
   3  14  -1    2.03    0.64 
   3  14  -1    2.37    0.78 
  -3  14   1    1.60    0.89 
   3  14  -1    2.93    1.04 
   3  14  -1    2.06    0.99 
   3  14  -1    2.42    0.95 
  -3  14   1    2.89    1.03 
  -3  14   1    0.97    1.21 
   3  14  -1    2.05    0.81 
   3  14  -1    1.12    0.88 
   2 -14  -1   13.34    0.96 
  -2 -14   1   15.31    1.49 
   2 -14  -1   11.50    1.41 
  -2 -14   1   17.40    1.70 
   2 -14  -1   15.09    1.48 
   2 -14  -1   14.15    1.72 
   2 -14  -1   14.93    1.19 
   2 -14  -1   11.27    1.17 
   2 -14  -1   13.94    1.43 
   2 -14  -1   14.58    1.51 
   2 -14  -1   13.24    1.33 
   2 -14  -1   14.12    1.60 
  -2  14   1   14.49    1.74 
   2  14  -1   15.52    1.31 
   2  14  -1   15.56    1.50 
  -2  14   1   12.93    1.59 
   2  14  -1   14.82    1.31 
   2  14  -1   15.13    1.53 
  -2  14   1   15.96    1.46 
  -2  14   1   15.01    1.53 
   2  14  -1   15.57    1.40 
   2  14  -1   13.65    1.73 
   2  14  -1   14.16    1.40 
   1 -14  -1   72.59    4.82 
  -1 -14   1   79.15    5.01 
   1 -14  -1   75.84    4.78 
   1 -14  -1   75.61    4.97 
  -1 -14   1   61.22    4.90 
   1 -14  -1   73.53    4.80 
   1 -14  -1   77.28    5.20 
   1 -14  -1   76.21    4.87 
   1 -14  -1   71.75    4.76 
   1  14  -1   78.63    4.75 
   1  14  -1   72.08    4.73 
   1  14  -1   73.39    4.71 
   1  14  -1   72.79    5.04 
   1  14  -1   81.13    4.76 
  -1  14   1   77.92    4.87 
   1  14  -1   79.54    4.88 
  -1  14   1   72.97    4.90 
  -1  14   1   77.73    4.97 
   1  14  -1   74.72    4.93 
   1  14  -1   74.99    4.85 
   1  14  -1   78.62    5.18 
   1  14  -1   81.27    4.68 
   1  14  -1   79.06    4.78 
  -1  14   1   78.64    5.12 
  -1  14   1   70.76    5.16 
   0 -14   1   92.12    6.06 
   0 -14   1   97.73    6.09 
   0 -14  -1   91.56    6.08 
   0 -14  -1   95.49    6.08 
   0 -14   1  104.82    6.00 
   0 -14  -1   99.39    6.22 
   0 -14  -1   98.33    6.49 
   0 -14  -1   98.17    6.10 
   0 -14  -1   92.46    6.18 
   0 -14   1   93.70    6.03 
   0 -14   1  111.98    6.37 
   0  14   1   96.06    6.71 
   0  14  -1   94.15    6.08 
   0  14   1   94.59    6.05 
   0  14   1   98.55    6.05 
   0  14  -1  103.62    6.26 
   0  14   1   89.13    6.16 
   0  14   1  102.72    6.00 
   0  14  -1   96.77    5.96 
   0  14   1   87.72    5.94 
   0  14   1   98.12    6.24 
   0  14   1   92.07    6.08 
   0  14   1   95.23    6.02 
   0  14  -1   91.81    6.10 
   0  14  -1  100.72    6.05 
   0  14  -1   92.74    5.97 
   1 -14   1   49.63    3.28 
  -1 -14  -1   51.72    3.40 
  -1 -14  -1   53.12    3.48 
   1 -14   1   50.93    3.70 
   1 -14   1   46.68    3.12 
   1 -14   1   54.65    3.37 
   1 -14   1   50.67    3.27 
   1 -14   1   53.73    3.26 
   1 -14   1   48.33    3.44 
  -1 -14  -1   52.76    3.51 
   1 -14   1   51.20    3.41 
   1 -14   1   47.33    3.51 
   1  14   1   54.77    3.21 
   1  14   1   42.83    3.53 
   1  14   1   51.59    3.23 
   1  14   1   50.81    3.37 
   1  14   1   47.88    3.29 
   1  14   1   50.02    3.23 
   1  14   1   46.60    3.22 
   1  14   1   50.63    3.39 
   1  14   1   50.08    3.46 
  -1  14  -1   52.94    3.44 
  -1  14  -1   51.83    3.40 
  -1  14  -1   51.31    3.65 
  -1  14  -1   51.38    3.53 
   2 -14   1    7.93    1.08 
   2 -14   1    7.46    1.24 
   2 -14   1    7.80    1.32 
  -2 -14  -1    7.69    1.15 
  -2 -14  -1    8.91    1.06 
  -2 -14  -1    7.21    1.20 
   2 -14   1    7.29    0.80 
   2 -14   1    6.60    0.91 
   2 -14   1    7.54    1.16 
   2 -14   1    9.18    1.14 
   2 -14   1    8.37    1.03 
   2  14   1    6.95    0.95 
  -2  14  -1    7.06    1.26 
   2  14   1    9.73    1.52 
   2  14   1    7.48    1.30 
   2  14   1    6.91    1.02 
   2  14   1    7.62    1.28 
  -2  14  -1    6.60    1.42 
   2  14   1    7.35    1.08 
  -2  14  -1    6.94    1.26 
  -2  14  -1    7.68    1.14 
   2  14   1    6.88    1.18 
   3 -14   1    4.41    0.95 
  -3 -14  -1    4.46    0.89 
   3 -14   1    3.34    1.21 
   3 -14   1    4.59    0.82 
   3 -14   1    3.88    0.97 
   3 -14   1    4.15    1.10 
   3 -14   1    3.23    0.99 
   3 -14   1    4.24    0.84 
   3  14   1    3.00    0.93 
  -3  14  -1    3.56    1.23 
   3  14   1    3.88    1.09 
  -3  14  -1    2.82    1.36 
   3  14   1    4.16    1.59 
   3  14   1    3.16    0.86 
  -3  14  -1    3.65    1.10 
   3  14   1    3.34    0.82 
   3  14   1    3.51    1.25 
   3  14   1    4.44    1.25 
   4 -14   1    8.12    1.47 
   4 -14   1    8.82    1.34 
   4 -14   1    9.87    1.04 
   4 -14   1    9.11    0.77 
  -4 -14  -1    9.20    1.16 
   4 -14   1    9.71    1.59 
   4  14   1   10.33    2.13 
   4  14   1    8.15    1.45 
   4  14   1   11.24    1.58 
   5 -14   1    1.86    0.64 
   5 -14   1    0.54    0.85 
   5 -14   1    2.86    0.89 
   5 -14   1    2.36    0.68 
   5 -14   1    2.79    0.97 
   5 -14   1    1.67    1.01 
   5 -14   1    1.73    0.44 
   5  14   1    2.36    1.11 
   5  14   1    1.46    0.41 
   5  14   1    1.79    0.37 
   5  14   1    1.51    0.64 
   5  14   1    2.68    0.94 
   5  14   1    2.70    0.64 
   6 -14   1    9.45    0.97 
   6 -14   1    9.16    0.73 
   6 -14   1    9.39    0.67 
   6 -14   1    6.55    1.24 
   6  14   1    9.44    0.99 
   6  14   1    9.75    0.64 
   6 -15  -1    1.94    0.40 
   6 -15  -1    1.69    0.79 
   6 -15  -1    2.12    0.42 
   6 -15  -1    2.36    0.48 
   6 -15  -1    0.94    0.66 
   6  15  -1    1.24    0.45 
   5 -15  -1    5.17    1.15 
   5 -15  -1    4.93    0.77 
   5 -15  -1    5.23    1.19 
   5 -15  -1    5.94    0.75 
   5 -15  -1    5.31    1.22 
   5  15  -1    6.87    1.07 
   5  15  -1    6.84    1.22 
   5  15  -1    6.40    0.75 
   5  15  -1    6.95    0.73 
   5  15  -1    5.51    0.79 
   5  15  -1    6.22    0.69 
   5  15  -1    6.28    1.16 
   4 -15  -1    2.50    1.10 
   4 -15  -1    2.27    0.93 
   4 -15  -1    2.46    0.75 
   4 -15  -1    3.77    1.29 
   4 -15  -1    2.94    0.94 
   4 -15  -1    1.65    1.17 
   4  15  -1    1.66    0.92 
   4  15  -1    4.52    1.35 
  -4  15   1    1.29    1.48 
  -4  15   1    1.93    1.00 
   4  15  -1    3.22    1.06 
   3 -15  -1   10.72    1.57 
   3 -15  -1   11.30    1.41 
   3 -15  -1   12.31    1.43 
   3 -15  -1   11.16    1.36 
   3 -15  -1   10.59    1.36 
   3  15  -1   10.85    1.56 
  -3  15   1    7.27    1.86 
  -3  15   1    6.70    1.64 
  -3  15   1    9.47    1.45 
   3  15  -1   11.13    1.36 
   3  15  -1   10.79    1.24 
   3  15  -1    9.41    1.28 
   3  15  -1   12.60    1.22 
  -3  15   1   12.17    1.68 
   3  15  -1    9.13    1.47 
   3  15  -1   12.50    1.36 
   2 -15  -1    7.23    0.91 
   2 -15  -1    8.55    0.65 
  -2 -15   1    9.20    1.39 
   2 -15  -1    7.14    1.47 
   2 -15  -1    8.27    1.22 
   2 -15  -1    7.87    1.45 
   2 -15  -1    9.03    1.24 
   2 -15  -1    8.29    1.42 
   2 -15  -1    9.52    1.28 
   2 -15  -1    8.79    1.14 
   2  15  -1    7.89    0.99 
   2  15  -1    8.42    1.19 
   2  15  -1    5.72    1.47 
   2  15  -1    9.11    1.13 
  -2  15   1    5.99    1.39 
  -2  15   1    7.12    1.39 
   2  15  -1    7.73    1.17 
  -2  15   1    8.75    1.24 
   2  15  -1    8.56    1.23 
   2  15  -1    9.51    1.36 
   1 -15  -1   33.63    2.20 
   1 -15  -1   31.81    2.37 
  -1 -15   1   29.91    2.40 
   1 -15  -1   33.42    2.21 
  -1 -15   1   30.43    2.45 
  -1 -15   1   33.31    2.35 
   1 -15  -1   31.12    2.49 
   1 -15  -1   32.69    2.28 
   1 -15  -1   28.79    2.27 
  -1  15   1   31.35    2.31 
   1  15  -1   33.63    2.18 
  -1  15   1   28.54    2.37 
   1  15  -1   32.57    2.45 
  -1  15   1   29.28    2.28 
   1  15  -1   33.75    2.36 
   1  15  -1   30.70    2.17 
  -1  15   1   28.92    2.53 
   1  15  -1   31.61    2.05 
   1  15  -1   29.87    2.29 
   1  15  -1   25.00    2.43 
   1  15  -1   28.00    2.12 
   1  15  -1   32.10    2.67 
   1  15  -1   32.20    2.14 
  -1  15   1   28.84    2.41 
   1  15  -1   30.11    2.21 
   1  15  -1   30.94    2.17 
   0 -15   1   53.75    3.71 
   0 -15   1   43.52    3.24 
   0 -15  -1   47.72    3.74 
   0 -15  -1   47.54    3.40 
   0 -15  -1   48.11    3.27 
   0 -15   1   47.95    3.13 
   0 -15  -1   44.49    3.27 
   0 -15   1   46.40    3.27 
   0  15   1   47.15    3.25 
   0  15   1   46.11    3.27 
   0  15   1   45.22    3.14 
   0  15   1   50.76    3.40 
   0  15  -1   47.93    3.30 
   0  15   1   49.19    3.43 
   0  15  -1   47.51    3.11 
   0  15   1   47.46    3.17 
   0  15  -1   49.24    3.44 
   0  15  -1   50.19    3.42 
   0  15  -1   44.67    3.25 
   0  15  -1   50.03    3.22 
   0  15   1   51.81    3.16 
   0  15   1   50.26    3.24 
  -1 -15  -1   35.17    2.57 
  -1 -15  -1   33.74    2.47 
   1 -15   1   35.72    2.46 
   1 -15   1   36.36    2.54 
   1 -15   1   31.95    2.14 
   1 -15   1   32.14    2.74 
   1 -15   1   33.21    2.30 
   1 -15   1   32.72    2.35 
   1 -15   1   31.35    2.27 
   1 -15   1   35.91    2.42 
   1 -15   1   34.21    2.28 
   1 -15   1   34.94    2.26 
  -1 -15  -1   35.27    2.62 
   1  15   1   32.67    2.24 
   1  15   1   31.79    2.23 
   1  15   1   33.18    2.45 
  -1  15  -1   33.28    2.57 
   1  15   1   34.67    2.51 
  -1  15  -1   35.73    2.48 
  -1  15  -1   35.75    2.46 
   1  15   1   29.17    2.25 
   1  15   1   32.59    2.34 
   1  15   1   30.59    2.23 
  -1  15  -1   33.94    2.72 
   1  15   1   28.04    2.59 
   1  15   1   32.46    2.31 
   1  15   1   33.45    2.41 
   1  15   1   35.47    2.22 
   2 -15   1   18.06    1.68 
   2 -15   1   17.93    1.53 
   2 -15   1   16.80    1.61 
  -2 -15  -1   19.20    1.67 
   2 -15   1   19.07    1.62 
   2 -15   1   15.66    1.42 
   2 -15   1   17.15    1.68 
   2 -15   1   16.88    1.87 
  -2 -15  -1   16.74    1.73 
   2  15   1   18.37    1.50 
   2  15   1   18.28    1.56 
  -2  15  -1   19.84    1.76 
  -2  15  -1   21.35    1.69 
   2  15   1   17.51    2.01 
  -2  15  -1   20.17    2.03 
  -2  15  -1   16.93    1.72 
   2  15   1   18.54    1.49 
   2  15   1   16.42    1.83 
   2  15   1   17.99    1.67 
   2  15   1   17.21    1.59 
   2  15   1   19.58    1.52 
   2  15   1   18.50    2.01 
  -3 -15  -1   20.39    1.75 
   3 -15   1   21.91    1.79 
   3 -15   1   20.50    1.94 
   3 -15   1   19.22    1.77 
   3 -15   1   20.67    1.71 
   3 -15   1   21.01    1.62 
   3 -15   1   21.87    1.74 
   3 -15   1   17.41    1.77 
   3  15   1   23.30    1.96 
  -3  15  -1   22.80    2.01 
   3  15   1   20.59    2.34 
   3  15   1   21.41    1.76 
   3  15   1   21.18    1.77 
   3  15   1   22.12    2.05 
  -3  15  -1   23.89    2.38 
  -3  15  -1   22.69    1.90 
   3  15   1   20.31    1.64 
   3  15   1   23.06    1.84 
   4 -15   1    5.65    1.48 
   4 -15   1    4.70    0.59 
   4 -15   1    5.34    1.23 
   4 -15   1    3.97    1.37 
   4 -15   1    5.06    0.90 
   4  15   1    5.03    1.38 
   4  15   1    3.65    1.56 
   4  15   1    4.27    1.15 
   5 -15   1    6.49    0.99 
   5 -15   1    5.27    0.73 
   5 -15   1    4.86    1.35 
   5 -15   1    5.40    0.83 
   5 -15   1    5.31    0.98 
   5 -15   1    5.30    1.29 
   5 -15   1    4.89    0.72 
   5  15   1    4.33    0.45 
   5  15   1    3.80    0.65 
   5  15   1    4.93    0.68 
   5  15   1    3.18    1.19 
   5  15   1    4.68    0.98 
   5  15   1    4.44    1.02 
   6 -15   1    2.26    0.44 
   6 -15   1    2.76    0.37 
   6 -15   1    2.34    0.69 
   6 -15   1    1.72    0.72 
   6  15   1    2.57    0.72 
   6  15   1    2.99    0.31 
   6 -16  -1   -0.02    0.45 
   6 -16  -1    0.79    0.30 
   6 -16  -1    0.83    0.27 
   6 -16  -1    0.90    0.32 
   6  16  -1    0.65    0.40 
   5 -16  -1    0.20    0.89 
   5 -16  -1    1.01    0.77 
   5 -16  -1    0.79    0.47 
   5 -16  -1    1.27    0.49 
   5 -16  -1    1.20    0.72 
   5 -16  -1    0.55    0.91 
   5  16  -1    2.78    1.03 
   5  16  -1    1.61    0.48 
   5  16  -1    1.64    0.58 
   5  16  -1    0.95    0.91 
   5  16  -1    0.90    0.61 
   5  16  -1    1.40    0.51 
   5  16  -1    1.05    0.47 
   4 -16  -1   19.07    1.30 
   4 -16  -1   17.42    1.41 
   4 -16  -1   18.46    1.38 
   4 -16  -1   14.34    1.67 
   4 -16  -1   18.89    1.83 
   4 -16  -1   17.92    1.33 
   4 -16  -1   16.32    1.99 
   4 -16  -1   17.66    2.03 
   4 -16  -1   18.47    1.66 
   4 -16  -1   18.06    1.58 
   4 -16  -1   17.68    1.80 
   4  16  -1   18.09    1.63 
  -4  16   1   16.12    2.40 
   4  16  -1   18.27    1.37 
   4  16  -1   20.57    1.88 
   4  16  -1   16.91    1.42 
  -4  16   1   17.38    1.85 
   4  16  -1   15.06    1.37 
   4  16  -1   20.12    1.92 
   4  16  -1   16.55    1.46 
  -3 -16   1   10.52    1.67 
   3 -16  -1   10.80    1.41 
   3 -16  -1   12.06    1.48 
   3 -16  -1   10.27    1.56 
   3 -16  -1   12.07    1.42 
   3 -16  -1   11.91    1.45 
  -3  16   1   11.20    1.55 
   3  16  -1   11.21    1.44 
  -3  16   1   10.20    1.75 
   3  16  -1   10.83    2.17 
   3  16  -1   11.95    1.29 
   3  16  -1   11.41    1.35 
   3  16  -1   12.78    1.44 
   3  16  -1   11.69    1.65 
   3  16  -1   12.58    1.26 
  -3  16   1   12.00    1.67 
   2 -16  -1   25.09    2.02 
   2 -16  -1   21.52    1.98 
   2 -16  -1   22.59    1.83 
  -2 -16   1   26.27    2.16 
   2 -16  -1   23.75    1.47 
   2 -16  -1   19.86    1.69 
   2 -16  -1   23.87    2.61 
  -2 -16   1   18.73    2.37 
   2 -16  -1   24.86    1.99 
   2 -16  -1   22.93    2.19 
   2  16  -1   23.89    1.77 
  -2  16   1   21.06    2.25 
   2  16  -1   24.47    1.86 
   2  16  -1   23.57    1.89 
   2  16  -1   23.40    2.03 
  -2  16   1   21.49    2.30 
   2  16  -1   23.03    2.25 
  -2  16   1   25.12    2.02 
   2  16  -1   26.53    1.90 
   2  16  -1   23.72    2.02 
  -2  16   1   20.83    2.00 
  -2  16   1   21.61    2.10 
   1 -16  -1   42.23    2.74 
   1 -16  -1   43.73    2.85 
   1 -16  -1   42.99    2.79 
   1 -16  -1   45.16    2.71 
   1 -16  -1   42.12    2.68 
   1 -16  -1   40.17    3.01 
  -1 -16   1   42.90    2.84 
   1  16  -1   37.10    2.67 
  -1  16   1   35.64    2.88 
  -1  16   1   34.90    2.70 
   1  16  -1   37.33    2.83 
  -1  16   1   36.39    3.03 
   1  16  -1   40.32    2.61 
   1  16  -1   39.70    2.68 
   1  16  -1   36.00    3.15 
   1  16  -1   40.16    2.53 
   1  16  -1   38.93    2.95 
  -1  16   1   37.12    2.86 
   1  16  -1   37.56    2.78 
   1  16  -1   41.98    2.67 
   1  16  -1   34.92    2.64 
  -1  16   1   35.67    2.77 
   1  16  -1   35.53    2.72 
   0 -16  -1    9.89    1.31 
   0 -16   1   10.42    1.37 
   0 -16  -1    9.83    1.76 
   0 -16   1   11.60    1.09 
   0 -16  -1   11.16    1.33 
   0 -16   1   11.28    1.44 
   0 -16  -1   10.96    1.42 
   0 -16   1   10.16    1.31 
   0  16  -1   10.89    1.52 
   0  16  -1   11.38    1.08 
   0  16   1   12.58    1.53 
   0  16  -1    9.77    1.31 
   0  16   1   11.65    1.17 
   0  16  -1    8.17    1.33 
   0  16   1   10.02    1.36 
   0  16  -1   11.13    1.48 
   0  16   1   10.22    1.10 
   0  16  -1   10.28    1.20 
   0  16   1   10.20    1.58 
   0  16   1   10.54    1.41 
   0  16   1   11.37    1.03 
   0  16   1   10.99    1.32 
   0  16  -1   11.45    1.31 
   0  16   1    9.49    1.24 
   1 -16   1   57.07    4.60 
   1 -16   1   53.30    4.40 
   1 -16   1   70.14    4.22 
  -1 -16  -1   69.82    4.36 
   1 -16   1   70.14    4.44 
   1 -16   1   64.25    4.15 
   1 -16   1   69.17    4.19 
  -1 -16  -1   65.43    4.46 
   1 -16   1   57.06    4.19 
   1 -16   1   63.77    4.21 
   1 -16   1   67.09    4.29 
   1 -16   1   67.93    4.35 
   1  16   1   71.08    4.19 
   1  16   1   67.37    4.15 
   1  16   1   71.41    4.12 
   1  16   1   62.84    4.52 
  -1  16  -1   68.20    4.19 
   1  16   1   69.41    4.32 
  -1  16  -1   62.57    4.48 
   1  16   1   60.56    4.13 
  -1  16  -1   62.18    4.58 
   1  16   1   67.73    4.29 
   1  16   1   63.27    4.23 
   1  16   1   69.20    4.19 
  -1  16  -1   70.80    4.36 
   1  16   1   63.92    4.15 
   1  16   1   65.59    4.39 
   1  16   1   64.67    4.14 
  -1  16  -1   64.56    4.44 
   1  16   1   66.71    4.15 
   2 -16   1   35.52    2.77 
   2 -16   1   40.12    2.76 
   2 -16   1   40.48    2.79 
  -2 -16  -1   37.59    2.75 
   2 -16   1   34.89    2.51 
   2 -16   1   39.23    2.64 
   2 -16   1   39.71    2.72 
   2 -16   1   38.56    2.67 
  -2  16  -1   35.94    2.77 
   2  16   1   35.22    2.57 
  -2  16  -1   30.87    2.94 
   2  16   1   35.57    2.67 
   2  16   1   36.64    2.83 
   2  16   1   41.68    2.66 
   2  16   1   39.51    2.54 
  -2  16  -1   33.14    3.07 
   2  16   1   38.50    2.73 
  -2  16  -1   40.57    2.79 
   2  16   1   39.18    2.62 
   2  16   1   37.05    3.05 
   2  16   1   38.31    3.07 
   3 -16   1    8.20    1.20 
   3 -16   1    9.45    1.18 
   3 -16   1    8.43    1.26 
   3 -16   1    8.15    1.44 
   3 -16   1    6.43    1.25 
   3 -16   1    7.15    1.00 
   3  16   1    6.34    1.05 
   3  16   1    7.23    2.01 
   3  16   1    5.41    1.55 
   3  16   1    6.59    1.28 
  -3  16  -1    6.89    1.41 
   3  16   1    6.63    1.43 
  -3  16  -1    8.32    1.33 
   3  16   1    6.55    1.22 
   3  16   1    7.60    1.19 
  -3  16  -1    7.11    1.82 
   4 -16   1   21.83    2.03 
   4 -16   1   23.59    1.52 
   4 -16   1   19.87    1.38 
   4 -16   1   18.28    1.83 
   4 -16   1   18.60    1.42 
   4 -16   1   18.16    2.01 
   4 -16   1   19.16    1.50 
   4 -16   1   20.44    1.47 
   4 -16   1   19.95    1.59 
   4  16   1   19.84    1.85 
   4  16   1   20.50    1.48 
   4  16   1   19.14    1.96 
   4  16   1   19.49    1.45 
   4  16   1   20.43    1.94 
   4  16   1   19.01    1.61 
   4  16   1   19.90    1.53 
   5 -16   1    3.33    0.90 
   5 -16   1    1.96    0.60 
   5 -16   1    1.47    0.75 
   5 -16   1    0.76    0.91 
   5 -16   1    0.81    0.70 
   5 -16   1    1.43    0.48 
   5  16   1    1.62    0.69 
   5  16   1    0.78    0.47 
   5  16   1    0.83    0.39 
   5  16   1    1.52    0.64 
   5  16   1    0.56    0.99 
   5  16   1    1.71    0.36 
   5  16   1    1.12    0.55 
   6 -16   1    0.50    0.59 
   6 -16   1    1.64    0.31 
   6 -16   1    1.16    0.35 
   6  16   1    0.89    0.24 
   6  16   1    1.12    0.47 
   6 -17  -1    0.81    0.26 
   6 -17  -1    0.09    0.40 
   6 -17  -1    1.11    0.36 
   6 -17  -1    0.58    0.24 
   6  17  -1    0.99    0.40 
   5 -17  -1    5.26    0.72 
   5 -17  -1    5.08    1.47 
   5 -17  -1    5.34    0.69 
   5 -17  -1    4.15    1.06 
   5 -17  -1    3.64    1.25 
   5 -17  -1    6.48    1.10 
   5  17  -1    5.29    0.69 
   5  17  -1    5.41    0.76 
   5  17  -1    7.18    1.41 
   5  17  -1    4.19    1.08 
   5  17  -1    5.75    0.70 
   5  17  -1    5.74    0.65 
   5  17  -1    6.78    0.88 
   4 -17  -1    1.65    0.90 
   4 -17  -1    1.96    0.61 
   4 -17  -1    2.24    0.59 
   4 -17  -1    1.92    0.55 
   4 -17  -1    3.16    1.09 
   4 -17  -1    3.37    1.23 
   4 -17  -1    2.61    0.94 
   4 -17  -1    2.39    0.95 
   4 -17  -1    3.09    0.78 
   4 -17  -1    2.70    1.19 
   4 -17  -1    3.48    1.05 
  -4  17   1    1.71    1.55 
   4  17  -1    2.48    0.77 
   4  17  -1    2.05    0.76 
   4  17  -1    2.73    0.89 
   4  17  -1    2.83    0.70 
   4  17  -1    3.40    1.16 
   4  17  -1    3.39    0.98 
   4  17  -1    2.87    1.04 
   3 -17  -1    5.23    0.75 
  -3 -17   1    6.56    1.45 
   3 -17  -1    4.86    1.31 
   3 -17  -1    4.20    1.29 
   3 -17  -1    6.41    1.26 
   3 -17  -1    6.35    1.61 
   3 -17  -1    4.85    1.42 
   3 -17  -1    5.65    1.29 
   3  17  -1    4.96    1.07 
   3  17  -1    5.07    1.08 
  -3  17   1    4.84    1.42 
  -3  17   1    5.34    1.50 
   3  17  -1    7.05    1.30 
   3  17  -1    5.73    1.09 
   3  17  -1    4.19    1.13 
   3  17  -1    6.45    1.29 
  -3  17   1    6.71    1.36 
   2 -17  -1   13.02    1.54 
   2 -17  -1   13.13    0.91 
   2 -17  -1   14.30    1.58 
   2 -17  -1   10.93    1.72 
   2 -17  -1   12.94    1.51 
   2 -17  -1   12.50    1.38 
   2 -17  -1   11.36    1.19 
  -2 -17   1   14.06    1.62 
  -2  17   1   12.06    1.68 
   2  17  -1   13.85    1.56 
   2  17  -1   13.52    1.31 
   2  17  -1   13.43    1.78 
  -2  17   1   11.81    1.79 
   2  17  -1   14.69    1.92 
   2  17  -1   14.53    1.44 
   2  17  -1   12.05    1.35 
   2  17  -1   14.14    1.37 
  -2  17   1   13.46    1.57 
  -2  17   1   11.91    1.80 
   2  17  -1   14.58    1.64 
   1 -17  -1   23.44    1.97 
   1 -17  -1   27.08    2.40 
   1 -17  -1   25.75    2.11 
  -1 -17   1   29.83    2.27 
  -1 -17   1   21.09    2.17 
   1 -17  -1   25.77    2.15 
   1 -17  -1   24.76    2.05 
   1 -17  -1   23.92    2.10 
  -1  17   1   23.56    2.20 
   1  17  -1   28.80    1.94 
   1  17  -1   25.33    2.54 
   1  17  -1   26.83    1.98 
  -1  17   1   29.71    2.12 
  -1  17   1   26.58    2.13 
  -1  17   1   26.64    2.23 
   1  17  -1   26.23    1.97 
   1  17  -1   30.04    2.31 
   1  17  -1   24.73    2.04 
  -1  17   1   26.37    2.37 
   1  17  -1   26.93    2.15 
   1  17  -1   26.86    1.91 
   1  17  -1   27.54    2.10 
   1  17  -1   26.35    1.90 
   0 -17   1   37.31    2.58 
   0 -17   1   36.92    2.73 
   0 -17  -1   37.44    2.73 
   0 -17   1   38.16    2.72 
   0 -17  -1   37.53    2.73 
   0 -17   1   35.86    2.51 
   0  17   1   37.11    2.70 
   0  17  -1   37.00    2.58 
   0  17   1   34.56    2.71 
   0  17   1   36.22    2.67 
   0  17   1   36.06    2.57 
   0  17  -1   36.65    2.74 
   0  17  -1   43.74    3.15 
   0  17  -1   35.85    2.84 
   0  17   1   31.77    2.84 
   0  17  -1   38.95    2.71 
   0  17   1   36.38    2.61 
   0  17   1   35.23    2.91 
   0  17  -1   39.84    2.55 
   0  17   1   35.80    2.60 
   0  17  -1   35.99    2.66 
   0  17   1   37.50    2.51 
   0  17   1   37.23    2.83 
   1 -17   1   14.48    1.21 
   1 -17   1   15.86    1.43 
  -1 -17  -1   12.01    1.54 
   1 -17   1   12.16    1.74 
  -1 -17  -1   15.09    1.53 
   1 -17   1   12.79    1.49 
   1 -17   1   12.56    1.39 
   1 -17   1   14.22    1.33 
   1 -17   1   12.68    1.66 
   1  17   1   11.14    1.01 
   1  17   1   11.84    1.15 
   1  17   1   12.78    1.79 
   1  17   1   11.50    1.18 
   1  17   1   10.85    1.59 
   1  17   1   11.97    1.35 
  -1  17  -1   13.43    1.30 
  -1  17  -1   12.24    1.71 
   1  17   1   14.01    1.35 
   1  17   1   13.67    1.48 
  -1  17  -1   12.63    1.55 
  -1  17  -1   12.05    1.51 
  -1  17  -1   12.40    1.45 
   1  17   1   11.15    1.24 
   1  17   1   10.88    1.21 
   1  17   1   12.00    1.43 
   2 -17   1   15.98    1.37 
   2 -17   1   14.72    1.52 
   2 -17   1   15.65    1.61 
   2 -17   1   15.23    1.60 
   2 -17   1   15.97    1.71 
   2 -17   1   15.82    1.65 
  -2 -17  -1   16.79    1.71 
   2 -17   1   15.00    2.28 
   2  17   1   16.51    2.02 
  -2  17  -1   17.01    1.67 
  -2  17  -1   16.53    1.77 
   2  17   1   12.34    1.62 
   2  17   1   16.54    1.48 
   2  17   1   17.28    1.51 
   2  17   1   16.03    1.45 
  -2  17  -1   10.12    1.85 
   2  17   1   13.76    2.06 
   2  17   1   15.50    1.63 
   2  17   1   16.69    1.85 
   3 -17   1    4.78    1.89 
   3 -17   1    4.21    1.61 
   3 -17   1    7.70    1.26 
   3 -17   1    6.14    1.13 
  -3 -17  -1    4.02    1.67 
   3 -17   1    6.17    1.16 
  -3  17  -1    7.49    1.45 
   3  17   1    4.34    1.04 
   3  17   1    3.08    1.75 
   3  17   1    6.27    1.64 
   3  17   1    5.10    1.17 
  -3  17  -1    5.53    1.30 
   3  17   1    5.29    1.24 
   3  17   1    4.53    1.41 
   3  17   1    5.55    1.05 
   4 -17   1    2.35    0.57 
   4 -17   1    2.18    0.73 
   4 -17   1    2.31    0.70 
   4 -17   1    2.34    0.57 
   4 -17   1    1.95    1.07 
   4 -17   1    1.41    0.42 
   4 -17   1    2.52    1.07 
   4 -17   1    2.35    0.84 
   4 -17   1    1.52    0.58 
   4  17   1    0.96    1.20 
   4  17   1    1.55    0.53 
   4  17   1    1.89    0.68 
   4  17   1    2.27    0.65 
   4  17   1    1.63    1.00 
   4  17   1    1.62    0.61 
   4  17   1    0.61    1.02 
   5 -17   1    3.02    0.66 
   5 -17   1    2.51    0.64 
   5 -17   1    2.25    0.91 
   5 -17   1    1.75    0.74 
   5 -17   1    3.78    0.91 
   5  17   1    2.71    0.84 
   5  17   1    3.07    1.41 
   5  17   1    2.09    0.58 
   5  17   1    2.83    0.56 
   5  17   1    3.09    0.66 
   5  17   1    2.38    0.39 
   5  17   1    1.86    0.69 
   5  17   1    2.35    0.69 
   6 -17   1    2.09    0.29 
   6 -17   1    1.50    0.35 
   6  17   1    1.90    0.59 
   6  17   1    1.92    0.26 
   6  17   1    2.29    0.27 
   5 -18  -1    7.66    1.46 
   5 -18  -1    7.85    0.86 
   5 -18  -1    7.85    1.11 
   5 -18  -1    8.94    1.24 
   5 -18  -1    8.83    0.83 
   5  18  -1    7.96    0.89 
   5  18  -1    9.27    0.80 
   5  18  -1    8.73    0.80 
   5  18  -1   10.10    0.95 
   5  18  -1    8.12    0.85 
   5  18  -1    9.07    1.22 
   4 -18  -1   28.62    2.05 
   4 -18  -1   25.24    1.75 
   4 -18  -1   25.02    2.07 
   4 -18  -1   25.96    1.81 
   4 -18  -1   25.43    2.39 
   4 -18  -1   23.69    1.78 
   4 -18  -1   26.15    1.87 
   4 -18  -1   28.85    2.09 
   4  18  -1   27.01    1.87 
   4  18  -1   28.51    1.92 
  -4  18   1   24.21    2.85 
   4  18  -1   25.85    2.19 
   4  18  -1   26.47    2.04 
   4  18  -1   28.36    2.29 
   4  18  -1   26.50    1.86 
   4  18  -1   26.50    1.80 
   3 -18  -1   16.95    1.32 
   3 -18  -1   18.07    1.83 
   3 -18  -1   18.33    2.02 
   3 -18  -1   19.44    1.92 
   3 -18  -1   15.75    1.84 
   3 -18  -1   19.57    1.79 
  -3 -18   1   17.69    2.04 
   3 -18  -1   18.38    1.82 
   3  18  -1   19.34    1.73 
   3  18  -1   19.83    2.02 
  -3  18   1   16.09    2.32 
   3  18  -1   17.92    1.63 
   3  18  -1   16.86    1.78 
   3  18  -1   20.18    1.81 
  -3  18   1   19.72    2.03 
  -3  18   1   18.70    1.93 
   3  18  -1   14.60    1.67 
   2 -18  -1   10.10    1.41 
   2 -18  -1    9.81    0.74 
   2 -18  -1   10.78    1.48 
   2 -18  -1   10.62    1.27 
   2 -18  -1   10.28    1.44 
  -2 -18   1   11.86    1.65 
   2 -18  -1    9.90    1.65 
   2  18  -1    9.79    1.31 
   2  18  -1   10.12    1.56 
  -2  18   1    9.17    1.44 
  -2  18   1    9.01    1.92 
   2  18  -1    9.64    1.19 
   2  18  -1    8.09    1.40 
   2  18  -1    7.23    1.92 
   2  18  -1    8.43    1.85 
  -2  18   1   10.21    1.61 
   2  18  -1    9.85    1.35 
  -2  18   1    7.90    1.65 
   2  18  -1    9.72    1.35 
   1 -18  -1   19.68    1.76 
   1 -18  -1   19.14    2.03 
  -1 -18   1   19.15    1.84 
   1 -18  -1   18.11    1.82 
   1 -18  -1   17.74    1.67 
   1 -18  -1   18.24    1.63 
  -1 -18   1   16.70    2.03 
   1 -18  -1   17.83    1.58 
   1  18  -1   19.99    1.84 
   1  18  -1   20.64    2.46 
   1  18  -1   16.62    1.68 
   1  18  -1   18.66    1.55 
   1  18  -1   17.19    1.42 
   1  18  -1   18.10    1.58 
  -1  18   1   16.63    1.96 
  -1  18   1   18.15    1.77 
   1  18  -1   20.07    1.51 
   1  18  -1   20.28    1.60 
   1  18  -1   18.04    2.00 
  -1  18   1   17.03    1.84 
  -1  18   1   19.28    2.16 
  -1  18   1   17.17    1.87 
   0 -18  -1   12.75    1.54 
   0 -18   1   13.31    1.47 
   0 -18   1   13.05    1.53 
   0 -18  -1   12.91    1.58 
   0 -18   1   12.01    1.35 
   0  18   1   13.88    1.57 
   0  18   1   12.53    1.42 
   0  18   1   12.74    1.71 
   0  18  -1   12.42    1.41 
   0  18   1   13.54    1.98 
   0  18   1   12.38    1.33 
   0  18  -1   14.33    1.34 
   0  18   1   12.73    1.30 
   0  18  -1   12.95    1.76 
   0  18  -1   12.76    1.70 
   0  18   1   13.23    1.75 
   0  18  -1   10.30    1.37 
   0  18   1   12.39    1.53 
   0  18   1   11.46    1.40 
   0  18  -1   13.72    1.58 
   0  18  -1   15.41    1.97 
   1 -18   1   23.53    2.12 
   1 -18   1   24.73    1.90 
   1 -18   1   25.80    2.08 
  -1 -18  -1   24.44    2.06 
  -1 -18  -1   32.01    2.65 
   1 -18   1   24.99    1.61 
   1 -18   1   25.25    1.80 
   1 -18   1   23.94    1.99 
   1 -18   1   24.41    1.95 
  -1  18  -1   22.98    1.87 
   1  18   1   22.38    1.93 
   1  18   1   23.76    1.89 
  -1  18  -1   23.19    2.33 
   1  18   1   22.75    2.33 
  -1  18  -1   25.33    2.08 
   1  18   1   23.51    2.05 
  -1  18  -1   25.22    2.27 
   1  18   1   23.14    2.03 
   1  18   1   21.54    2.13 
  -1  18  -1   23.54    2.06 
   1  18   1   20.43    1.63 
   1  18   1   24.25    2.48 
   1  18   1   21.71    1.91 
   1  18   1   23.03    1.79 
   1  18   1   22.19    1.76 
   1  18   1   23.77    1.82 
   2 -18   1    5.54    1.23 
   2 -18   1    7.23    1.43 
   2 -18   1    8.21    1.37 
   2 -18   1    7.39    1.06 
   2 -18   1    7.48    1.28 
  -2 -18  -1    7.14    1.41 
   2 -18   1    6.51    1.26 
   2  18   1    6.13    1.20 
   2  18   1    8.07    1.82 
  -2  18  -1    6.71    1.29 
  -2  18  -1    8.65    1.44 
   2  18   1    6.38    1.15 
   2  18   1    6.12    1.16 
   2  18   1    4.33    1.27 
   2  18   1    7.37    1.60 
  -2  18  -1    5.95    1.62 
   2  18   1    7.22    1.40 
  -3 -18  -1    9.03    1.51 
   3 -18   1    8.47    1.85 
   3 -18   1    9.50    1.58 
   3 -18   1    9.70    1.39 
   3 -18   1    9.31    1.37 
   3 -18   1    9.50    1.31 
   3  18   1    7.60    1.86 
   3  18   1    7.41    1.34 
   3  18   1    9.07    2.19 
   3  18   1    8.56    1.39 
   3  18   1   10.71    1.49 
  -3  18  -1    8.90    1.48 
  -3  18  -1   10.05    1.82 
   3  18   1   10.01    1.32 
   3  18   1    8.65    1.19 
   4 -18   1   14.73    1.85 
   4 -18   1   16.72    1.78 
   4 -18   1   13.50    1.05 
   4 -18   1   14.03    1.30 
   4 -18   1   16.57    1.17 
   4 -18   1   14.98    1.10 
   4 -18   1   15.76    1.19 
   4 -18   1   12.16    1.53 
   4  18   1   13.80    1.27 
   4  18   1   13.47    1.16 
   4  18   1   13.60    1.27 
   4  18   1   11.47    1.51 
   4  18   1   16.83    1.87 
   4  18   1   13.95    1.26 
   4  18   1   12.67    1.69 
   5 -18   1    4.33    1.21 
   5 -18   1    4.16    0.63 
   5 -18   1    4.01    0.95 
   5 -18   1    4.06    0.60 
   5 -18   1    3.95    1.11 
   5  18   1    4.57    0.72 
   5  18   1    4.40    0.59 
   5  18   1    3.77    0.54 
   5  18   1    4.09    0.62 
   5  18   1    4.03    0.82 
   5  18   1    4.17    0.46 
   5 -19  -1    5.01    0.65 
   5 -19  -1    5.75    1.23 
   5 -19  -1    2.89    1.12 
   5 -19  -1    5.19    0.93 
   5 -19  -1    4.72    0.61 
   5  19  -1    5.05    0.83 
   5  19  -1    4.04    0.62 
   5  19  -1    4.95    0.69 
   5  19  -1    3.75    0.62 
   5  19  -1    5.11    0.70 
   4 -19  -1   20.00    1.75 
   4 -19  -1   20.28    1.42 
   4 -19  -1   20.92    2.21 
   4 -19  -1   22.11    2.12 
   4 -19  -1   25.59    2.03 
   4 -19  -1   19.19    1.76 
   4 -19  -1   21.79    1.52 
   4 -19  -1   19.25    1.55 
   4 -19  -1   19.78    1.73 
   4  19  -1   20.65    1.61 
   4  19  -1   20.86    1.79 
  -4  19   1   17.68    2.52 
   4  19  -1   21.55    1.94 
   4  19  -1   21.18    1.51 
   4  19  -1   20.58    1.50 
   4  19  -1   19.62    1.53 
   4  19  -1   23.58    2.01 
   3 -19  -1   10.16    1.50 
   3 -19  -1   10.26    0.92 
  -3 -19   1   10.39    1.75 
   3 -19  -1    8.93    1.54 
   3 -19  -1    9.20    1.47 
   3 -19  -1    8.06    1.32 
   3 -19  -1   10.88    1.71 
   3  19  -1    6.99    2.13 
   3  19  -1    8.56    1.40 
  -3  19   1   11.81    1.62 
   3  19  -1    9.74    1.52 
   3  19  -1    8.90    1.29 
  -3  19   1   11.17    2.08 
  -3  19   1   10.18    1.77 
   3  19  -1    9.44    1.38 
  -2 -19   1    3.40    1.39 
   2 -19  -1    2.18    1.12 
   2 -19  -1    2.71    1.08 
   2 -19  -1    3.00    1.14 
   2 -19  -1    3.52    1.48 
   2 -19  -1    2.70    0.44 
   2 -19  -1    2.22    1.10 
  -2  19   1    2.99    1.23 
   2  19  -1    1.74    1.45 
   2  19  -1    2.58    0.91 
  -2  19   1    1.46    0.92 
   2  19  -1    3.55    1.13 
  -2  19   1    4.35    1.59 
   2  19  -1    3.14    1.29 
   2  19  -1    2.52    1.09 
   2  19  -1    1.79    1.28 
   2  19  -1    3.44    1.12 
   2  19  -1    2.01    0.95 
   1 -19  -1   11.07    1.50 
   1 -19  -1   11.64    1.73 
   1 -19  -1    8.45    1.58 
  -1 -19   1   10.16    1.49 
   1 -19  -1    9.61    1.23 
   1 -19  -1    9.78    1.41 
   1 -19  -1   10.76    1.36 
   1  19  -1   11.70    1.18 
   1  19  -1    9.98    1.15 
   1  19  -1   13.64    1.35 
   1  19  -1    8.32    1.37 
   1  19  -1   10.70    1.18 
   1  19  -1   11.46    1.30 
  -1  19   1    8.83    1.65 
   1  19  -1    9.15    1.74 
  -1  19   1   10.58    1.56 
  -1  19   1    9.53    1.43 
   1  19  -1   11.46    1.58 
  -1  19   1   10.89    1.76 
  -1  19   1   13.72    1.66 
   0 -19   1    7.00    1.24 
   0 -19   1    6.99    1.42 
   0 -19  -1    4.64    1.27 
   0 -19   1    3.38    1.07 
   0 -19  -1    5.94    1.40 
   0  19   1    4.60    1.28 
   0  19  -1    5.28    1.71 
   0  19  -1    4.80    1.08 
   0  19   1    4.87    1.28 
   0  19   1    6.26    1.75 
   0  19   1    5.19    1.16 
   0  19   1    5.35    1.08 
   0  19   1    5.41    1.58 
   0  19  -1    6.38    1.24 
   0  19   1    4.93    1.32 
   0  19   1    5.83    1.04 
   0  19  -1    4.78    1.55 
   0  19  -1    6.45    1.39 
   0  19  -1    6.62    1.26 
   1 -19   1    8.27    0.78 
  -1 -19  -1    8.83    1.38 
   1 -19   1    7.18    1.27 
   1 -19   1    9.73    1.07 
   1 -19   1    7.75    1.24 
   1 -19   1    7.75    1.30 
   1 -19   1    9.17    1.51 
   1 -19   1    7.78    1.46 
  -1  19  -1    8.79    1.39 
   1  19   1    7.22    1.12 
   1  19   1    9.61    1.55 
   1  19   1    8.28    1.71 
   1  19   1    7.45    0.80 
   1  19   1    8.85    1.43 
   1  19   1    7.87    1.04 
  -1  19  -1    8.82    1.11 
  -1  19  -1    6.68    1.54 
   1  19   1    8.23    1.28 
   1  19   1    9.83    1.25 
  -1  19  -1    9.60    1.37 
  -1  19  -1    9.51    1.81 
   1  19   1    8.02    1.25 
   2 -19   1    2.79    1.02 
  -2 -19  -1    2.27    1.08 
   2 -19   1    1.58    1.12 
   2 -19   1    2.98    1.31 
   2 -19   1    3.15    0.98 
   2 -19   1    2.02    1.10 
   2 -19   1    3.63    1.12 
  -2  19  -1    1.14    0.90 
   2  19   1    2.60    0.99 
   2  19   1    1.20    0.91 
   2  19   1    3.09    1.20 
   2  19   1    4.16    1.16 
  -2  19  -1    3.03    1.15 
   2  19   1    2.24    0.92 
  -2  19  -1    3.64    1.28 
   2  19   1    2.32    1.56 
   3 -19   1   10.59    1.41 
   3 -19   1    9.43    1.56 
   3 -19   1    9.56    1.43 
   3 -19   1    7.63    1.63 
  -3 -19  -1    9.13    1.60 
   3 -19   1    8.19    1.29 
  -3  19  -1   10.15    1.94 
   3  19   1    8.11    1.38 
   3  19   1   11.18    3.43 
   3  19   1    8.88    1.59 
   3  19   1    7.90    1.85 
   3  19   1    6.09    1.50 
   3  19   1    8.44    1.27 
   3  19   1    9.04    1.18 
  -3  19  -1    8.81    1.50 
   4 -19   1   30.93    2.02 
   4 -19   1   28.68    2.03 
   4 -19   1   28.76    1.94 
   4 -19   1   27.58    2.25 
   4 -19   1   31.44    2.39 
   4 -19   1   27.36    1.94 
   4 -19   1   29.37    1.89 
   4 -19   1   26.10    2.67 
   4 -19   1   27.08    1.86 
   4  19   1   29.48    2.02 
   4  19   1   29.78    1.96 
   4  19   1   28.84    2.02 
   4  19   1   31.23    2.29 
   4  19   1   26.87    2.40 
   4  19   1   30.94    2.02 
   4  19   1   31.52    2.38 
   5 -19   1    5.72    0.64 
   5 -19   1    5.21    0.67 
   5 -19   1    3.94    1.13 
   5  19   1    5.48    0.63 
   5  19   1    5.67    0.72 
   5  19   1    4.71    0.80 
   5  19   1    5.40    0.55 
   5  19   1    5.43    0.71 
   5  19   1    5.41    0.48 
   5 -20  -1   11.15    0.86 
   5 -20  -1   10.56    1.15 
   5 -20  -1   10.14    1.27 
   5 -20  -1   11.56    0.86 
   5 -20  -1    8.34    1.01 
   5  20  -1   10.48    0.83 
   5  20  -1    9.45    0.80 
   5  20  -1   10.73    0.88 
   5  20  -1   10.63    0.95 
   5  20  -1   10.34    0.88 
   4 -20  -1   21.20    1.76 
   4 -20  -1   19.90    1.49 
   4 -20  -1   21.28    2.03 
   4 -20  -1   19.20    1.52 
   4 -20  -1   21.37    1.49 
   4 -20  -1   20.49    1.39 
   4 -20  -1   21.70    1.69 
   4 -20  -1   18.92    2.12 
   4 -20  -1   23.79    1.76 
   4 -20  -1   20.72    1.72 
   4  20  -1   18.89    1.55 
   4  20  -1   20.75    1.44 
   4  20  -1   20.86    1.48 
   4  20  -1   20.80    1.59 
   4  20  -1   17.56    1.96 
   4  20  -1   19.28    1.94 
   4  20  -1   17.79    1.68 
   3 -20  -1    2.09    0.93 
   3 -20  -1    1.01    1.13 
   3 -20  -1    1.78    1.01 
   3 -20  -1    0.21    0.97 
   3 -20  -1    2.17    0.93 
   3 -20  -1    0.53    0.58 
   3 -20  -1    2.47    0.62 
  -3 -20   1    2.30    1.26 
   3 -20  -1    2.31    1.07 
   3 -20  -1    1.35    1.06 
   3 -20  -1    1.01    0.72 
   3  20  -1    2.11    0.58 
   3  20  -1    1.93    0.65 
   3  20  -1    2.58    0.98 
   3  20  -1    1.67    0.57 
  -3  20   1    1.72    1.24 
   3  20  -1    1.19    1.08 
   3  20  -1    1.96    0.65 
   3  20  -1    1.64    0.75 
   3  20  -1    1.93    0.50 
  -3  20   1    2.16    1.43 
  -3  20   1    1.79    1.24 
   3  20  -1    2.38    0.64 
   3  20  -1    2.75    1.05 
   2 -20  -1    7.37    1.28 
   2 -20  -1    8.69    1.68 
   2 -20  -1    8.18    1.54 
   2 -20  -1    7.86    1.45 
   2 -20  -1    8.23    0.63 
  -2 -20   1    6.13    1.54 
   2 -20  -1    7.85    1.48 
   2 -20  -1    5.54    1.22 
   2  20  -1    8.10    1.32 
   2  20  -1   10.38    1.84 
   2  20  -1    8.07    1.48 
  -2  20   1    8.36    1.45 
   2  20  -1    8.86    1.32 
  -2  20   1    7.85    1.68 
   2  20  -1    8.34    1.22 
  -2  20   1   11.20    1.99 
   2  20  -1    8.82    1.55 
   1 -20  -1   17.46    1.97 
   1 -20  -1   19.02    2.21 
   1 -20  -1   17.42    1.78 
   1 -20  -1   17.30    1.92 
   1 -20  -1   15.86    1.92 
  -1 -20   1   19.03    1.99 
   1  20  -1   21.47    1.63 
   1  20  -1   23.05    2.23 
   1  20  -1   21.86    1.80 
  -1  20   1   21.02    1.95 
  -1  20   1   18.80    1.90 
  -1  20   1   20.21    1.70 
  -1  20   1   22.35    2.12 
  -1  20   1   18.16    2.00 
   1  20  -1   21.62    1.99 
  -1  20   1   16.54    2.17 
   1  20  -1   20.00    1.82 
   1  20  -1   20.70    1.67 
  -1  20   1   21.33    2.35 
   1  20  -1   20.02    1.61 
   0 -20   1    8.70    1.24 
   0 -20   1    8.03    1.46 
   0 -20  -1    5.89    1.39 
   0 -20   1    7.53    1.33 
   0 -20  -1    7.17    1.49 
   0  20   1    7.39    1.31 
   0  20   1    6.71    1.16 
   0  20  -1    8.95    1.39 
   0  20   1    6.88    1.40 
   0  20  -1    8.19    1.67 
   0  20  -1    7.84    1.25 
   0  20  -1    7.77    1.50 
   0  20   1    7.16    1.40 
   0  20   1    4.73    1.75 
   0  20   1    7.49    1.67 
   0  20  -1    7.59    1.82 
   0  20  -1    7.71    1.18 
   0  20   1    7.72    1.48 
   1 -20   1   13.19    1.68 
   1 -20   1   12.41    1.51 
   1 -20   1   14.50    0.92 
  -1 -20  -1   13.20    1.65 
   1 -20   1   12.81    1.52 
   1 -20   1   13.41    1.46 
   1 -20   1   14.79    1.76 
  -1  20  -1   13.40    2.01 
  -1  20  -1   11.49    1.58 
  -1  20  -1   13.29    1.61 
   1  20   1    9.96    1.73 
   1  20   1   13.72    1.65 
  -1  20  -1   12.44    1.31 
   1  20   1   11.73    1.20 
   1  20   1   11.62    1.50 
   1  20   1   10.12    1.86 
   1  20   1   10.19    1.29 
   1  20   1   10.91    1.30 
  -1  20  -1   10.85    1.85 
   1  20   1   13.20    1.43 
   2 -20   1    3.94    1.47 
   2 -20   1    5.10    0.92 
   2 -20   1    5.16    1.38 
   2 -20   1    5.94    1.78 
   2 -20   1    5.51    1.26 
   2 -20   1    4.56    1.42 
  -2 -20  -1    5.05    1.40 
   2 -20   1    4.34    1.47 
   2 -20   1    4.67    1.39 
   2  20   1    2.98    0.97 
  -2  20  -1    4.88    1.56 
   2  20   1    5.57    1.33 
   2  20   1    5.86    1.87 
  -2  20  -1    6.71    2.74 
   2  20   1    4.72    1.73 
  -2  20  -1    4.40    1.17 
   2  20   1    4.20    1.18 
  -2  20  -1    5.33    1.35 
   2  20   1    3.62    1.03 
   3 -20   1    1.72    0.87 
   3 -20   1    0.94    1.03 
   3 -20   1    2.52    1.05 
   3 -20   1    2.00    0.96 
   3 -20   1    1.82    0.59 
  -3 -20  -1   -0.01    1.26 
   3 -20   1    0.71    0.99 
   3 -20   1    1.24    0.80 
   3  20   1    1.35    0.33 
   3  20   1    2.11    1.21 
   3  20   1    0.97    0.45 
   3  20   1    0.68    0.65 
   3  20   1    0.13    0.86 
   3  20   1    0.36    0.64 
  -3  20  -1    1.27    1.24 
   3  20   1    1.77    0.95 
   3  20   1    1.23    0.60 
   3  20   1    0.67    0.98 
  -3  20  -1    0.37    1.06 
   3  20   1    1.16    0.58 
   3  20   1    2.33    1.07 
   3  20   1    1.74    0.62 
   4 -20   1   28.97    1.90 
   4 -20   1   25.22    2.24 
   4 -20   1   33.38    2.49 
   4 -20   1   31.30    2.20 
   4 -20   1   30.70    1.97 
   4 -20   1   30.13    2.11 
   4 -20   1   30.50    1.88 
   4 -20   1   28.62    1.98 
   4 -20   1   30.74    2.42 
   4 -20   1   30.72    1.99 
   4  20   1   27.40    2.24 
   4  20   1   30.32    1.95 
   4  20   1   28.54    2.02 
   4  20   1   27.93    2.03 
   4  20   1   31.39    2.40 
   4  20   1   28.97    2.00 
   4  20   1   30.34    2.25 
   5 -20   1   17.19    1.20 
   5 -20   1   15.99    1.47 
   5 -20   1   16.78    1.19 
   5  20   1   15.74    1.17 
   5  20   1   16.99    1.13 
   5  20   1   17.26    1.14 
   5  20   1   17.46    1.22 
   5  20   1   17.58    1.22 
   5  20   1   16.15    1.07 
   5  20   1   16.87    1.29 
   5 -21  -1    6.82    0.87 
   5 -21  -1    6.13    0.61 
   5 -21  -1    3.85    0.92 
   5 -21  -1    4.73    0.77 
   5 -21  -1    6.16    0.60 
   5  21  -1    5.58    0.66 
   5  21  -1    5.05    0.60 
   5  21  -1    5.48    0.57 
   5  21  -1    4.74    0.70 
   5  21  -1    5.08    0.55 
   4 -21  -1    5.05    1.35 
   4 -21  -1    6.61    1.00 
   4 -21  -1    5.26    1.01 
   4 -21  -1    5.77    1.11 
   4 -21  -1    5.63    0.74 
   4 -21  -1    4.87    0.60 
   4 -21  -1    5.11    1.43 
   4 -21  -1    6.80    0.98 
   4  21  -1    4.74    0.91 
   4  21  -1    3.79    1.22 
   4  21  -1    4.55    0.81 
   4  21  -1    4.74    1.12 
   4  21  -1    4.87    0.78 
   4  21  -1    5.16    1.28 
   4  21  -1    5.63    0.73 
   3 -21  -1   13.67    1.58 
   3 -21  -1   13.77    1.73 
   3 -21  -1   13.34    1.63 
   3 -21  -1   11.82    1.42 
   3 -21  -1   14.09    0.94 
   3 -21  -1   15.10    1.44 
   3 -21  -1   13.60    1.11 
   3 -21  -1   13.05    1.28 
   3 -21  -1    9.12    1.56 
   3 -21  -1   14.10    1.55 
   3  21  -1   11.37    1.20 
  -3  21   1   13.57    2.13 
   3  21  -1   11.05    1.59 
   3  21  -1   11.05    0.91 
   3  21  -1   11.70    1.09 
  -3  21   1   12.64    1.86 
   3  21  -1   11.60    1.21 
   3  21  -1   12.47    1.63 
   3  21  -1   14.39    1.37 
   3  21  -1   14.72    1.57 
   3  21  -1   11.52    1.05 
   3  21  -1   11.36    1.09 
   2 -21  -1    5.67    1.70 
  -2 -21   1    6.53    1.54 
   2 -21  -1    5.04    1.10 
   2 -21  -1    5.96    1.47 
   2 -21  -1    4.89    1.35 
   2 -21  -1    5.58    0.98 
   2 -21  -1    6.25    1.50 
   2  21  -1    7.60    1.47 
  -2  21   1    5.83    1.44 
   2  21  -1    5.90    1.18 
  -2  21   1    7.38    1.94 
   2  21  -1    6.82    1.86 
  -2  21   1    5.82    1.62 
   2  21  -1    5.38    1.35 
   2  21  -1    7.57    1.47 
   2  21  -1    6.03    1.36 
  -1 -21   1   20.96    2.11 
   1 -21  -1   19.38    2.04 
   1 -21  -1   18.46    1.81 
   1 -21  -1   17.56    1.95 
   1 -21  -1   18.85    2.22 
  -1  21   1   21.00    1.94 
  -1  21   1   19.10    1.98 
   1  21  -1   19.48    2.00 
   1  21  -1   18.93    1.59 
  -1  21   1   19.25    1.75 
   1  21  -1   19.18    1.67 
   1  21  -1   21.50    1.98 
   1  21  -1   20.99    2.26 
   1  21  -1   19.04    1.77 
  -1  21   1   18.43    2.40 
  -1  21   1   18.59    2.00 
   1  21  -1   18.24    1.79 
  -1  21   1   17.60    2.19 
   0 -21  -1   10.55    1.70 
   0 -21   1   12.10    1.49 
   0 -21   1   10.93    1.63 
   0 -21   1   11.95    1.72 
   0 -21  -1   12.19    1.67 
   0  21   1   11.84    1.33 
   0  21   1   11.14    1.82 
   0  21  -1   11.17    1.53 
   0  21   1   10.72    1.60 
   0  21   1   11.68    1.70 
   0  21  -1   13.43    2.08 
   0  21  -1   12.66    1.59 
   0  21  -1   12.70    1.78 
   0  21   1   13.46    2.02 
   0  21   1   11.13    1.48 
   0  21  -1   11.53    1.87 
   0  21  -1   12.36    1.36 
   1 -21   1   34.25    2.67 
   1 -21   1   31.56    2.49 
   1 -21   1   29.87    2.02 
   1 -21   1   28.44    2.50 
   1 -21   1   34.91    2.79 
   1 -21   1   31.34    2.40 
  -1 -21  -1   29.17    2.66 
  -1  21  -1   34.57    2.90 
  -1  21  -1   33.54    2.63 
  -1  21  -1   31.12    3.69 
   1  21   1   32.15    2.59 
   1  21   1   31.50    2.39 
   1  21   1   32.54    2.38 
  -1  21  -1   35.65    2.70 
   1  21   1   27.77    2.69 
   1  21   1   30.59    2.23 
  -1  21  -1   33.32    2.40 
   1  21   1   33.61    2.51 
   1  21   1   33.21    2.30 
   2 -21   1    3.78    1.24 
  -2 -21  -1    4.15    1.40 
   2 -21   1    2.18    1.11 
   2 -21   1    2.24    1.05 
   2 -21   1    4.21    0.84 
   2 -21   1    3.75    1.28 
   2 -21   1    3.01    1.20 
   2  21   1    2.46    1.06 
  -2  21  -1    3.35    1.36 
   2  21   1    2.29    0.94 
   2  21   1    3.70    1.31 
  -2  21  -1    3.98    1.08 
   2  21   1    2.14    1.63 
   2  21   1    1.80    0.98 
  -2  21  -1    3.25    1.23 
   2  21   1    4.18    1.27 
   3 -21   1   17.87    1.89 
   3 -21   1   20.35    2.19 
   3 -21   1   16.48    1.53 
   3 -21   1   16.26    1.75 
   3 -21   1   18.39    1.85 
   3 -21   1   19.81    1.79 
   3 -21   1   17.65    1.43 
   3  21   1   18.27    1.48 
   3  21   1   16.69    1.44 
   3  21   1   23.38    2.18 
   3  21   1   18.12    1.17 
   3  21   1   17.31    1.39 
   3  21   1   18.89    1.62 
   3  21   1   15.60    1.25 
   3  21   1   17.04    1.42 
   3  21   1   22.39    1.98 
   3  21   1   19.48    1.69 
   3  21   1   16.43    1.48 
  -3  21  -1   20.01    2.33 
   3  21   1   20.26    1.81 
   4 -21   1    9.88    0.88 
   4 -21   1    9.22    0.89 
   4 -21   1    9.07    0.73 
   4 -21   1    9.61    1.51 
   4 -21   1    9.70    1.36 
   4 -21   1    8.51    0.85 
   4 -21   1    8.75    1.52 
   4 -21   1    9.46    1.23 
   4  21   1    8.07    0.98 
   4  21   1    8.46    0.96 
   4  21   1    7.92    1.20 
   4  21   1   10.07    0.90 
   4  21   1    8.24    1.32 
   4  21   1    9.35    1.00 
   4  21   1   11.09    1.45 
   5 -21   1    5.75    0.96 
   5 -21   1    7.56    0.70 
   5 -21   1    7.11    0.67 
   5  21   1    8.31    0.80 
   5  21   1    7.53    0.70 
   5  21   1    7.88    0.73 
   5  21   1    7.07    0.64 
   5  21   1    7.67    0.64 
   5 -22  -1    2.97    0.48 
   5 -22  -1    3.62    0.50 
   5 -22  -1    2.67    0.59 
   5 -22  -1    3.07    0.68 
   5  22  -1    3.01    0.55 
   5  22  -1    3.03    0.43 
   5  22  -1    2.67    0.45 
   5  22  -1    2.66    0.50 
   5  22  -1    2.43    0.57 
   4 -22  -1   13.41    1.07 
   4 -22  -1   11.56    1.17 
   4 -22  -1   10.85    0.98 
   4 -22  -1   11.16    1.22 
   4 -22  -1   11.96    0.89 
   4 -22  -1   13.96    1.52 
   4 -22  -1   12.32    1.19 
   4  22  -1   11.81    1.02 
   4  22  -1   11.46    1.09 
   4  22  -1   11.07    1.01 
   4  22  -1   10.84    1.47 
   4  22  -1   11.27    1.00 
   3 -22  -1    4.14    1.36 
   3 -22  -1    5.90    1.31 
   3 -22  -1    3.64    0.80 
   3 -22  -1    3.26    1.08 
   3 -22  -1    5.58    1.51 
   3 -22  -1    4.73    1.25 
   3 -22  -1    5.13    0.97 
   3 -22  -1    4.91    1.28 
  -3  22   1    5.98    1.71 
   3  22  -1    4.39    0.59 
   3  22  -1    3.35    0.51 
   3  22  -1    2.43    0.64 
   3  22  -1    3.05    0.98 
   3  22  -1    3.64    1.08 
   3  22  -1    2.90    0.98 
  -3  22   1    2.37    1.38 
   3  22  -1    3.86    1.05 
   3  22  -1    4.31    0.87 
   3  22  -1    3.77    0.76 
   2 -22  -1   36.35    2.98 
   2 -22  -1   38.37    2.58 
   2 -22  -1   38.18    3.13 
   2 -22  -1   41.12    2.92 
   2 -22  -1   39.18    2.61 
   2  22  -1   34.55    2.89 
  -2  22   1   37.53    2.77 
  -2  22   1   38.89    3.08 
  -2  22   1   44.22    3.43 
  -2  22   1   31.87    2.95 
   2  22  -1   41.29    2.89 
   2  22  -1   38.84    2.88 
   1 -22  -1   55.92    4.08 
   1 -22  -1   54.87    3.86 
   1 -22  -1   51.95    3.78 
  -1 -22   1   47.24    3.91 
   1 -22  -1   49.77    3.65 
   1  22  -1   61.46    3.98 
  -1  22   1   54.06    3.89 
   1  22  -1   52.36    3.74 
  -1  22   1   50.42    4.02 
  -1  22   1   54.51    3.76 
   1  22  -1   48.37    3.66 
  -1  22   1   54.75    3.61 
   1  22  -1   48.32    3.97 
  -1  22   1   58.45    4.27 
   1  22  -1   52.28    3.54 
   1  22  -1   63.75    3.81 
   0 -22   1   15.25    1.61 
   0 -22   1   15.21    1.84 
   0 -22  -1   16.61    1.85 
   0  22   1   14.34    1.87 
   0  22   1   13.77    1.46 
   0  22   1   12.74    2.16 
   0  22   1   14.26    1.59 
   0  22   1   13.36    1.92 
   0  22  -1   15.64    1.68 
   0  22  -1   14.64    1.74 
   0  22  -1   14.76    1.93 
   0  22   1   15.09    1.46 
   0  22  -1   11.12    2.02 
   0  22   1   14.90    1.78 
   0  22  -1   15.06    2.21 
   0  22  -1   15.36    1.50 
   1 -22   1   26.03    1.98 
   1 -22   1   26.67    2.41 
  -1 -22  -1   19.66    2.29 
   1 -22   1   21.57    2.12 
   1 -22   1   28.02    2.32 
   1 -22   1   28.37    2.25 
   1 -22   1   24.37    1.55 
  -1  22  -1   20.91    2.57 
   1  22   1   23.97    2.13 
   1  22   1   23.07    2.30 
  -1  22  -1   23.77    2.02 
   1  22   1   24.35    2.18 
   1  22   1   23.95    2.00 
   1  22   1   23.22    1.89 
  -1  22  -1   22.20    2.25 
   1  22   1   20.89    1.98 
  -1  22  -1   25.37    2.39 
   1  22   1   24.05    1.80 
   2 -22   1   23.09    2.07 
   2 -22   1   23.26    2.12 
   2 -22   1   23.41    1.63 
   2 -22   1   24.62    2.13 
   2 -22   1   23.71    2.10 
  -2 -22  -1   25.05    2.28 
   2 -22   1   20.70    2.05 
   2  22   1   19.16    2.13 
  -2  22  -1   20.94    2.16 
   2  22   1   20.11    2.27 
   2  22   1   22.56    1.96 
  -2  22  -1   20.70    2.27 
   2  22   1   20.19    1.86 
   2  22   1   20.50    1.95 
  -2  22  -1   21.74    1.92 
   3 -22   1    6.78    1.51 
   3 -22   1    8.68    0.88 
   3 -22   1    7.61    1.29 
   3 -22   1    7.57    1.07 
   3 -22   1    8.71    1.46 
   3  22   1    8.42    0.89 
   3  22   1    7.76    0.75 
   3  22   1    7.70    0.63 
   3  22   1    7.90    0.99 
  -3  22  -1    8.41    1.80 
   3  22   1    8.34    1.00 
   3  22   1    7.25    0.95 
   3  22   1    9.80    1.17 
   3  22   1    7.92    1.24 
   3  22   1    9.97    1.61 
   4 -22   1    8.11    1.04 
   4 -22   1    7.85    0.79 
   4 -22   1    6.95    0.79 
   4 -22   1    4.64    1.38 
   4 -22   1    8.43    0.73 
   4 -22   1    7.18    0.60 
   4 -22   1    8.33    1.29 
   4  22   1    5.82    0.90 
   4  22   1    6.97    0.79 
   4  22   1    6.73    0.80 
   4  22   1    6.27    0.80 
   4  22   1    9.07    1.29 
   5 -22   1    2.08    0.46 
   5 -22   1    2.47    0.45 
   5  22   1    1.97    0.41 
   5  22   1    2.29    0.47 
   5  22   1    2.34    0.56 
   5  22   1    2.36    0.46 
   5  22   1    2.43    0.41 
   5 -23  -1    1.89    0.82 
   5 -23  -1    2.72    0.40 
   5 -23  -1    2.88    0.41 
   5  23  -1    2.48    0.36 
   5  23  -1    2.47    0.48 
   5  23  -1    3.27    0.49 
   5  23  -1    2.00    0.37 
   5  23  -1    3.09    0.43 
   4 -23  -1    3.00    0.59 
   4 -23  -1    2.86    0.86 
   4 -23  -1    2.61    0.83 
   4 -23  -1    3.05    1.11 
   4 -23  -1    2.13    0.83 
   4 -23  -1    2.56    0.45 
   4 -23  -1    2.77    0.59 
   4  23  -1    2.59    0.65 
   4  23  -1    2.80    0.79 
   4  23  -1    2.15    0.66 
   4  23  -1    1.81    0.64 
   3 -23  -1    1.82    1.01 
   3 -23  -1    2.11    1.04 
   3 -23  -1    1.80    0.74 
   3 -23  -1    1.70    0.67 
   3 -23  -1    0.87    0.52 
   3 -23  -1    1.63    0.99 
   3  23  -1    1.72    0.53 
   3  23  -1    0.68    0.90 
  -3  23   1    1.09    1.12 
   3  23  -1    3.02    0.87 
   3  23  -1    1.15    0.35 
   3  23  -1    1.30    0.54 
   3  23  -1    2.39    0.91 
   3  23  -1    1.35    0.45 
  -3  23   1    1.67    0.79 
  -3  23   1    1.49    1.44 
   3  23  -1    0.88    0.59 
   2 -23  -1    9.35    1.63 
   2 -23  -1    9.19    1.69 
   2 -23  -1   10.58    0.99 
   2 -23  -1   11.07    1.50 
   2 -23  -1   10.10    1.10 
   2 -23  -1    9.97    1.18 
   2 -23  -1    9.72    1.27 
   2 -23  -1    9.42    1.62 
   2 -23  -1    9.03    1.76 
  -2  23   1   10.10    1.76 
  -2  23   1    8.85    1.14 
   2  23  -1   10.75    1.60 
   2  23  -1    8.06    1.35 
   2  23  -1   10.19    0.97 
  -2  23   1   10.20    1.04 
   2  23  -1    7.19    1.41 
  -2  23   1   11.71    2.10 
   2  23  -1   10.08    1.51 
  -2  23   1   10.27    1.37 
  -2  23   1    9.95    1.71 
   1 -23  -1   21.74    2.03 
   1 -23  -1   23.02    1.89 
   1 -23  -1   20.10    2.12 
  -1 -23   1   15.59    2.07 
   1 -23  -1   18.67    2.24 
   1  23  -1   17.10    1.91 
  -1  23   1   21.97    1.97 
   1  23  -1   15.66    2.16 
  -1  23   1   18.88    2.04 
   1  23  -1   18.77    1.64 
  -1  23   1   19.32    2.46 
  -1  23   1   17.80    1.74 
  -1  23   1   18.15    2.25 
   1  23  -1   15.95    2.11 
   1  23  -1   21.45    2.49 
   0 -23  -1   33.26    2.79 
   0 -23   1   34.74    2.62 
   0 -23  -1   34.29    2.83 
   0 -23   1   31.69    2.79 
   0  23   1   35.16    2.98 
   0  23  -1   32.88    3.10 
   0  23  -1   33.78    2.61 
   0  23   1   33.77    3.09 
   0  23  -1   34.89    2.51 
   0  23   1   33.20    2.79 
   0  23   1   32.64    2.48 
   0  23   1   35.12    2.52 
   0  23  -1   39.05    2.84 
   0  23  -1   30.57    2.78 
   0  23   1   35.36    2.55 
   0  23   1   34.05    2.74 
   1 -23   1   36.38    3.05 
  -1 -23  -1   31.13    2.96 
   1 -23   1   36.29    2.32 
   1 -23   1   37.56    2.98 
   1 -23   1   36.61    2.89 
   1 -23   1   37.47    2.68 
  -1  23  -1   41.32    3.02 
   1  23   1   41.58    2.87 
  -1  23  -1   42.45    3.24 
   1  23   1   37.18    2.74 
   1  23   1   31.28    2.72 
   1  23   1   42.91    2.74 
  -1  23  -1   39.89    2.74 
  -1  23  -1   32.59    2.93 
  -1  23  -1   35.65    3.02 
   1  23   1   38.27    2.61 
  -1  23  -1   33.46    3.23 
   1  23   1   39.63    3.04 
   1  23   1   39.13    2.89 
   2 -23   1   16.18    1.34 
   2 -23   1   15.31    1.51 
   2 -23   1   19.23    1.91 
   2 -23   1   16.83    1.91 
   2 -23   1   17.30    1.81 
   2 -23   1   16.88    1.80 
   2 -23   1   15.21    1.81 
   2 -23   1   17.68    1.29 
   2  23   1   14.86    1.42 
  -2  23  -1   17.67    2.16 
   2  23   1   17.16    1.78 
  -2  23  -1   16.95    1.70 
   2  23   1   17.67    1.60 
  -2  23  -1   18.01    1.61 
   2  23   1   15.98    1.71 
   2  23   1   16.60    1.37 
   2  23   1   16.39    1.18 
   2  23   1   17.54    1.25 
  -2  23  -1   18.17    1.51 
   3 -23   1    0.88    0.55 
   3 -23   1   -0.31    0.98 
   3 -23   1    0.81    0.65 
   3 -23   1    0.48    0.94 
   3 -23   1    1.85    0.98 
   3  23   1    0.85    0.59 
   3  23   1    1.00    0.86 
   3  23   1    0.88    0.59 
   3  23   1    1.13    0.41 
   3  23   1    1.32    0.60 
   3  23   1    0.24    0.51 
   3  23   1    1.55    1.19 
  -3  23  -1    1.09    1.12 
   3  23   1    0.77    0.73 
   3  23   1    1.07    0.28 
   4 -23   1    4.02    0.54 
   4 -23   1    4.75    0.48 
   4 -23   1    5.05    0.94 
   4 -23   1    4.18    0.65 
   4 -23   1    5.11    0.65 
   4 -23   1    4.61    1.02 
   4  23   1    4.45    0.64 
   4  23   1    4.31    0.69 
   4  23   1    3.63    0.71 
   4  23   1    5.68    0.77 
   5 -23   1    5.79    0.50 
   5 -23   1    5.66    0.52 
   5  23   1    5.27    0.46 
   5  23   1    5.52    0.60 
   5  23   1    5.26    0.47 
   5  23   1    5.33    0.53 
   4 -24  -1    3.03    0.57 
   4 -24  -1    2.60    1.03 
   4 -24  -1    2.70    0.42 
   4 -24  -1    3.48    0.54 
   4 -24  -1    2.25    0.96 
   4 -24  -1    3.14    0.79 
   4  24  -1    3.54    0.65 
   4  24  -1    3.66    0.68 
   4  24  -1    3.88    0.63 
   4  24  -1    4.70    0.72 
   3 -24  -1    4.09    1.30 
   3 -24  -1    3.16    1.04 
   3 -24  -1    4.46    0.84 
   3 -24  -1    3.46    1.03 
   3 -24  -1    3.88    0.69 
   3  24  -1    3.97    0.62 
  -3  24   1    4.54    0.96 
   3  24  -1    4.79    0.74 
  -3  24   1    5.32    1.51 
   3  24  -1    4.33    0.83 
   3  24  -1    3.92    0.49 
  -3  24   1    3.11    1.41 
   3  24  -1    6.18    1.07 
   3  24  -1    3.51    0.76 
   2 -24  -1    5.69    0.95 
   2 -24  -1    6.57    1.14 
   2 -24  -1    6.86    1.43 
   2 -24  -1    6.68    0.81 
   2 -24  -1    5.71    1.60 
   2 -24  -1    5.67    1.46 
   2  24  -1    6.55    1.34 
  -2  24   1    7.45    1.06 
   2  24  -1    6.06    1.29 
  -2  24   1    6.24    1.11 
   2  24  -1    7.14    0.93 
   2  24  -1    7.19    1.25 
  -2  24   1    6.15    0.68 
  -2  24   1    6.26    1.57 
   2  24  -1    5.97    0.76 
  -2  24   1    7.99    1.94 
  -1 -24   1   20.50    1.75 
   1 -24  -1   23.39    1.83 
   1 -24  -1   24.43    1.99 
   1 -24  -1   19.39    1.66 
   1 -24  -1   20.36    1.69 
   1 -24  -1   23.85    2.18 
   1 -24  -1   21.64    2.50 
   1 -24  -1   20.83    1.53 
   1 -24  -1   22.94    2.29 
  -1  24   1   21.37    2.56 
   1  24  -1   23.58    1.76 
  -1  24   1   24.19    2.04 
   1  24  -1   20.21    1.68 
  -1  24   1   20.53    1.44 
  -1  24   1   23.72    1.85 
  -1  24   1   22.80    1.69 
  -1  24   1   22.77    2.19 
   1  24  -1   23.73    1.96 
   1  24  -1   28.87    2.31 
   1  24  -1   18.44    2.25 
   1  24  -1   27.21    2.34 
  -1  24   1   23.64    2.41 
  -1  24   1   21.15    1.73 
   0 -24  -1   18.59    2.09 
   0 -24   1   16.80    1.22 
   0 -24   1   16.88    1.66 
   0 -24  -1   16.22    1.74 
   0 -24   1   17.21    2.04 
   0 -24   1   18.32    1.79 
   0 -24  -1   15.17    1.29 
   0  24   1   18.87    1.97 
   0  24   1   16.61    1.65 
   0  24  -1   17.09    1.61 
   0  24   1   16.99    1.97 
   0  24   1   17.30    2.23 
   0  24   1   15.40    1.62 
   0  24   1   16.25    1.50 
   0  24   1   19.08    2.04 
   0  24  -1   22.73    2.21 
   0  24  -1   17.17    2.18 
   0  24  -1   16.39    1.90 
   0  24  -1   15.85    1.51 
   0  24   1   17.28    2.14 
   0  24  -1   17.66    1.61 
   0  24   1   14.74    1.42 
   0  24  -1   17.30    1.75 
   0  24   1   19.91    1.70 
   0  24  -1   15.69    1.68 
   1 -24   1   16.40    1.98 
   1 -24   1   16.85    1.41 
   1 -24   1   14.39    1.33 
   1 -24   1   14.85    1.78 
   1 -24   1   15.93    1.00 
   1 -24   1   15.32    1.52 
   1 -24   1   13.76    1.86 
   1 -24   1   16.11    1.12 
   1  24   1   13.32    1.13 
  -1  24  -1   13.35    1.07 
  -1  24  -1   14.29    2.15 
  -1  24  -1   13.24    1.69 
   1  24   1   13.28    1.78 
  -1  24  -1   13.80    1.32 
   1  24   1   12.96    1.18 
   1  24   1   14.22    1.93 
  -1  24  -1   16.35    2.09 
   1  24   1   15.97    1.54 
   1  24   1   12.95    1.39 
  -1  24  -1   14.62    1.77 
   1  24   1   15.40    1.83 
   1  24   1   13.93    1.56 
  -1  24  -1   13.22    1.55 
  -1  24  -1   16.47    2.03 
   2 -24   1    7.19    1.40 
   2 -24   1    8.36    1.49 
   2 -24   1    8.31    0.93 
   2 -24   1    8.28    1.11 
   2 -24   1    7.63    1.39 
   2 -24   1    7.32    0.77 
   2  24   1    7.68    0.90 
   2  24   1    7.05    0.99 
  -2  24  -1    7.80    1.16 
   2  24   1    8.56    1.33 
  -2  24  -1    8.34    1.09 
   2  24   1    6.85    0.89 
  -2  24  -1    6.51    1.64 
   2  24   1    7.26    1.35 
   2  24   1    7.27    0.70 
   3 -24   1    3.93    0.85 
   3 -24   1    2.72    1.31 
   3 -24   1    3.40    1.31 
   3  24   1    3.69    0.40 
   3  24   1    3.37    0.78 
   3  24   1    2.50    0.90 
   3  24   1    4.22    0.76 
   3  24   1    3.56    0.70 
   3  24   1    3.70    0.50 
  -3  24  -1    3.60    1.25 
   4 -24   1    2.56    0.84 
   4 -24   1    2.79    0.40 
   4 -24   1    2.60    0.79 
   4 -24   1    2.79    0.62 
   4 -24   1    1.80    0.56 
   4  24   1    1.67    0.61 
   4  24   1    2.32    0.65 
   4  24   1    2.58    0.60 
   4  24   1    2.10    0.62 
   4 -25  -1    7.74    0.72 
   4 -25  -1    7.78    0.64 
   4 -25  -1    6.74    1.01 
   4 -25  -1    7.95    0.88 
   4 -25  -1    7.45    0.57 
   4  25  -1    9.93    0.76 
   4  25  -1    8.45    0.76 
   4  25  -1    8.12    0.74 
   4  25  -1    7.66    0.80 
  -4  25   1    8.87    0.65 
   3 -25  -1    2.49    1.18 
   3 -25  -1    2.67    0.81 
   3 -25  -1    1.19    0.64 
   3 -25  -1    2.19    0.59 
   3  25  -1    2.04    0.53 
   3  25  -1    2.59    0.43 
   3  25  -1    1.82    0.50 
  -3  25   1    0.77    1.16 
  -3  25   1    2.98    0.83 
  -3  25   1    2.52    0.53 
  -3  25   1    1.58    1.13 
   3  25  -1    2.04    0.79 
   3  25  -1    2.60    0.62 
   2 -25  -1    7.57    0.87 
   2 -25  -1    8.97    1.16 
   2 -25  -1    7.98    1.51 
   2 -25  -1    9.09    0.88 
   2 -25  -1    8.68    1.00 
   2 -25  -1    7.85    1.56 
  -2  25   1    8.94    1.08 
   2  25  -1    9.28    0.77 
  -2  25   1    9.42    0.75 
  -2  25   1    9.26    1.12 
   2  25  -1    7.92    1.25 
   2  25  -1    8.34    1.50 
   2  25  -1    9.84    0.89 
  -2  25   1    8.50    1.87 
  -2  25   1    9.13    1.55 
   1 -25  -1    4.71    1.08 
   1 -25  -1    4.48    0.96 
   1 -25  -1    6.20    1.27 
   1 -25  -1    6.16    0.77 
   1 -25  -1    7.10    1.45 
  -1 -25   1    5.08    0.77 
   1 -25  -1    6.93    2.68 
   1 -25  -1    6.37    1.73 
   1  25  -1    5.35    1.50 
  -1  25   1    5.33    0.97 
   1  25  -1    5.64    0.86 
  -1  25   1    5.33    1.36 
  -1  25   1    5.72    0.97 
  -1  25   1    4.01    1.26 
   1  25  -1    5.33    1.32 
   1  25  -1    5.58    1.51 
   1  25  -1    4.72    1.06 
  -1  25   1    5.24    0.49 
  -1  25   1    5.15    1.20 
  -1  25   1    5.22    1.86 
   1  25  -1   10.32    2.00 
  -1  25   1    6.73    1.45 
   0 -25   1   19.23    1.96 
   0 -25   1   21.06    1.39 
   0 -25  -1   20.26    2.27 
   0 -25  -1   20.89    1.45 
   0 -25  -1   18.16    1.67 
   0  25   1   19.06    1.76 
   0  25  -1   22.44    1.77 
   0  25   1   22.04    2.21 
   0  25  -1   19.25    2.09 
   0  25  -1   21.62    1.77 
   0  25  -1   22.12    1.60 
   0  25  -1   22.93    1.61 
   0  25  -1   21.43    1.86 
   0  25   1   21.05    1.56 
   0  25   1   19.66    2.48 
   0  25   1   18.41    1.56 
   0  25   1   19.46    2.31 
   0  25   1   21.65    1.83 
   0  25  -1   21.12    2.39 
   0  25  -1   23.12    2.31 
   0  25   1   20.81    1.86 
   0  25   1   22.07    2.18 
   0  25  -1   23.53    1.93 
   0  25   1   20.37    1.77 
   1 -25   1    7.36    1.18 
   1 -25   1    7.42    1.09 
   1 -25   1    6.18    1.50 
   1 -25   1    7.47    0.66 
   1 -25   1    9.13    1.71 
   1 -25   1    8.05    0.96 
   1 -25   1   11.50    2.18 
  -1  25  -1    8.64    1.10 
   1  25   1    7.86    1.56 
  -1  25  -1    6.92    1.05 
  -1  25  -1    7.04    1.20 
  -1  25  -1    6.52    1.48 
   1  25   1    5.79    1.56 
  -1  25  -1    8.11    1.59 
  -1  25  -1   13.00    2.27 
   1  25   1    7.06    1.27 
   1  25   1    5.68    1.54 
   1  25   1    6.69    0.74 
  -1  25  -1   10.33    2.09 
   1  25   1    5.88    1.14 
  -1  25  -1    7.02    0.66 
   2 -25   1    6.19    0.81 
   2 -25   1    6.81    1.29 
   2 -25   1    7.15    1.05 
   2 -25   1    5.49    1.65 
   2  25   1    6.32    0.63 
  -2  25  -1    6.10    0.98 
  -2  25  -1    5.31    1.02 
   2  25   1    5.69    1.03 
   2  25   1    4.78    1.24 
  -2  25  -1    5.14    1.61 
   2  25   1    7.25    1.20 
  -2  25  -1    6.64    0.70 
   2  25   1    5.77    1.24 
   2  25   1    6.66    0.78 
   3 -25   1    2.27    1.21 
   3 -25   1    1.58    0.46 
   3 -25   1    0.51    0.64 
   3 -25   1    2.29    0.75 
   3  25   1    1.90    0.70 
   3  25   1    2.54    0.35 
  -3  25  -1   -0.04    1.05 
   3  25   1    1.84    0.53 
   3  25   1    2.19    0.39 
   3  25   1    1.97    0.54 
  -3  25  -1    2.06    0.76 
   4 -25   1    6.22    0.82 
   4 -25   1    5.73    0.94 
   4 -25   1    6.56    0.82 
   4 -25   1    6.51    0.63 
   4  25   1    6.27    0.68 
   4  25   1    6.31    0.67 
   4  25   1    5.59    0.67 
   4  25   1    5.86    0.67 
   4 -26  -1    2.74    0.66 
   4 -26  -1    3.19    0.35 
   4 -26  -1    2.19    0.46 
   4  26  -1    2.28    0.54 
   4  26  -1    2.29    0.47 
   4  26  -1    1.89    0.48 
  -4  26   1    2.51    0.59 
  -4  26   1    3.34    0.37 
   4  26  -1    2.73    0.47 
   3 -26  -1    2.84    0.57 
   3 -26  -1    2.02    0.85 
   3 -26  -1    3.06    1.08 
   3 -26  -1    3.42    0.69 
  -3  26   1    1.92    0.44 
   3  26  -1    3.08    0.54 
   3  26  -1    1.88    0.62 
  -3  26   1    2.39    0.72 
   3  26  -1    3.25    0.39 
   3  26  -1    2.27    0.60 
   3  26  -1    2.61    0.64 
   2 -26  -1    8.57    0.84 
   2 -26  -1    9.55    1.14 
   2 -26  -1    9.12    0.99 
   2 -26  -1    8.63    1.52 
   2 -26  -1    9.17    0.82 
   2 -26  -1    8.66    1.52 
  -2  26   1    8.99    0.72 
  -2  26   1    9.03    1.11 
  -2  26   1    8.77    1.51 
  -2  26   1    8.50    1.09 
   2  26  -1    8.82    0.76 
   2  26  -1    9.72    0.88 
   2  26  -1    8.78    1.19 
   2  26  -1    8.12    1.39 
  -2  26   1   13.54    2.53 
  -2  26   1    9.83    1.11 
   1 -26  -1   18.05    1.81 
   1 -26  -1   16.46    1.20 
   1 -26  -1   17.60    1.65 
   1 -26  -1   17.77    1.50 
   1 -26  -1   15.96    1.34 
  -1 -26   1   16.01    1.21 
   1  26  -1   15.48    1.83 
  -1  26   1   15.15    1.63 
  -1  26   1   16.86    1.86 
  -1  26   1   17.93    1.72 
  -1  26   1   15.68    1.44 
  -1  26   1   16.08    1.37 
  -1  26   1   15.05    1.35 
  -1  26   1   14.94    2.21 
   1  26  -1   15.44    1.21 
   1  26  -1   16.28    1.50 
   1  26  -1   16.73    2.33 
   1  26  -1   15.66    1.27 
   0 -26  -1   15.52    1.63 
   0 -26   1   12.47    1.04 
   0 -26  -1   13.15    1.03 
   0 -26   1   14.35    1.61 
   0 -26   1   14.31    1.25 
   0 -26  -1   14.60    1.31 
   0  26  -1   13.28    1.24 
   0  26  -1   15.30    1.39 
   0  26   1   17.28    1.49 
   0  26  -1   15.19    1.87 
   0  26  -1   13.05    1.59 
   0  26   1   13.99    1.21 
   0  26  -1   13.93    2.16 
   0  26   1   11.66    1.98 
   0  26  -1   14.83    1.55 
   0  26   1   14.52    1.45 
   0  26   1   12.57    1.52 
   0  26  -1   14.25    1.25 
   0  26   1   15.17    1.93 
   1 -26   1   18.86    1.56 
   1 -26   1   15.73    1.86 
   1 -26   1   18.26    1.49 
   1 -26   1   15.68    1.34 
  -1 -26  -1   16.81    1.24 
   1  26   1   14.02    1.58 
   1  26   1   16.25    1.51 
  -1  26  -1   15.56    1.36 
  -1  26  -1   17.10    1.73 
  -1  26  -1   15.92    1.08 
  -1  26  -1   16.39    1.51 
  -1  26  -1   18.86    2.11 
  -1  26  -1   15.68    2.12 
   1  26   1   13.01    1.78 
   1  26   1   16.36    1.09 
  -1  26  -1   16.40    1.42 
   2 -26   1    5.80    0.74 
   2 -26   1    5.17    1.04 
   2 -26   1    6.60    1.25 
   2  26   1    3.79    1.38 
   2  26   1    5.93    0.58 
  -2  26  -1    5.50    0.97 
  -2  26  -1    5.35    1.64 
   2  26   1    6.32    1.08 
   2  26   1    5.42    0.67 
  -2  26  -1    5.67    0.60 
  -2  26  -1    5.08    1.02 
   3 -26   1    3.25    1.13 
   3 -26   1    2.84    0.85 
   3 -26   1    3.24    0.55 
   3 -26   1    3.87    0.75 
   3  26   1    3.96    0.63 
   3  26   1    3.29    0.39 
  -3  26  -1    3.62    0.53 
   3  26   1    3.11    0.66 
  -3  26  -1    4.14    0.81 
   3  26   1    3.85    0.67 
   4 -26   1    3.92    0.62 
   4  26   1    3.88    0.49 
   4  26   1    3.25    0.53 
  -4  26  -1    4.28    0.47 
   4  26   1    3.94    0.51 
   3 -27  -1    5.40    0.70 
   3 -27  -1    4.90    0.58 
   3 -27  -1    4.37    0.80 
   3 -27  -1    4.73    1.05 
   3  27  -1    3.51    0.62 
  -3  27   1    5.05    0.47 
   3  27  -1    4.04    0.75 
  -3  27   1    4.72    0.74 
   3  27  -1    4.28    0.48 
   2 -27  -1    3.02    0.64 
  -2 -27   1    2.97    0.62 
   2 -27  -1    2.83    0.94 
   2 -27  -1    2.59    0.90 
   2 -27  -1    2.03    0.92 
  -2  27   1    2.13    1.18 
  -2  27   1    2.93    0.81 
   2  27  -1    2.62    0.49 
   2  27  -1    2.30    0.59 
  -2  27   1    2.76    0.37 
  -2  27   1    3.12    0.76 
   1 -27  -1    4.33    1.33 
  -1 -27   1    6.76    1.18 
   1 -27  -1    3.67    0.47 
   1 -27  -1    5.32    0.98 
   1 -27  -1    5.52    0.80 
  -1 -27   1    4.87    0.61 
   1  27  -1    3.69    0.93 
  -1  27   1    4.52    0.93 
  -1  27   1    4.80    0.82 
   1  27  -1    2.77    1.22 
  -1  27   1    3.94    1.89 
   1  27  -1    4.27    0.57 
  -1  27   1    3.61    0.85 
  -1  27   1    4.48    1.40 
   0 -27  -1   31.57    1.98 
   0 -27   1   32.45    2.14 
   0 -27   1   30.81    2.18 
   0 -27  -1   30.59    2.16 
   0  27   1   31.00    2.24 
   0  27  -1   30.80    2.14 
   0  27  -1   35.25    2.38 
   0  27   1   32.59    2.10 
   0  27   1   32.80    2.24 
   0  27  -1   31.71    2.12 
   0  27  -1   28.18    2.26 
   0  27   1   35.94    2.68 
   0  27   1   33.45    2.39 
   0  27  -1   26.56    2.69 
  -1 -27  -1    7.38    0.83 
   1 -27   1    8.96    1.54 
   1 -27   1    7.85    0.90 
   1 -27   1    8.56    1.06 
   1 -27   1    8.12    1.11 
  -1  27  -1    8.86    1.03 
   1  27   1    7.47    1.42 
  -1  27  -1    8.35    0.67 
  -1  27  -1    9.44    0.98 
   1  27   1   10.36    0.89 
  -1  27  -1    8.81    1.75 
  -1  27  -1    8.18    1.21 
   2 -27   1    4.62    0.54 
   2 -27   1    4.03    0.97 
  -2  27  -1    4.82    0.87 
  -2  27  -1    4.44    0.92 
  -2  27  -1    5.23    0.52 
   2  27   1    4.85    0.52 
   2  27   1    5.05    0.64 
   3 -27   1    4.74    0.68 
   3 -27   1    5.34    0.84 
   3 -27   1    4.79    0.57 
   3  27   1    3.99    0.64 
   3  27   1    4.85    0.69 
  -3  27  -1    5.09    0.76 
  -3  27  -1    5.64    0.51 
   3  27   1    4.82    0.68 
   3 -28  -1    1.06    0.76 
  -3 -28   1    2.54    0.56 
   3 -28  -1    3.08    0.66 
   3 -28  -1    2.98    0.60 
   3 -28  -1    2.89    0.48 
   3  28  -1    2.47    0.53 
  -3  28   1    2.89    0.82 
  -3  28   1    3.89    0.60 
  -3  28   1    3.88    0.42 
   2 -28  -1    3.42    0.79 
  -2 -28   1    3.12    0.60 
   2 -28  -1    2.67    1.00 
   2 -28  -1    4.17    0.84 
   2 -28  -1    3.34    0.51 
   2  28  -1    3.39    0.47 
  -2  28   1    2.36    0.74 
   2  28  -1    2.70    0.58 
  -2  28   1    2.53    0.74 
  -1 -28   1   20.18    1.32 
   1 -28  -1   19.99    1.60 
   1 -28  -1   20.39    1.45 
  -1  28   1   21.09    2.25 
  -1  28   1   20.68    1.56 
  -1  28   1   18.74    1.45 
   1  28  -1   19.25    1.50 
  -1  28   1   19.74    1.45 
   1  28  -1   19.93    2.13 
   0 -28   1   47.55    2.76 
   0 -28  -1   35.40    2.79 
   0 -28   1   42.33    2.83 
   0 -28  -1   42.15    2.82 
   0  28   1   44.61    2.74 
   0  28  -1   45.54    3.34 
   0  28  -1   42.92    2.95 
   0  28  -1   45.38    2.78 
   0  28  -1   44.21    2.78 
   1 -28   1   12.87    1.07 
   1 -28   1   14.30    1.16 
   1 -28   1   14.49    1.28 
  -1 -28  -1   14.23    1.03 
   1 -28   1   11.89    1.39 
   1  28   1   13.34    1.84 
  -1  28  -1   12.33    1.20 
  -1  28  -1   13.81    1.17 
   1  28   1   13.63    1.04 
  -1  28  -1   11.20    1.24 
   2 -28   1    1.48    0.63 
  -2 -28  -1    1.03    0.39 
  -2  28  -1    1.23    0.54 
  -2  28  -1    0.66    0.60 
   2  28   1    1.71    0.49 
  -2  28  -1    0.99    0.59 
  -2  28  -1    1.14    0.27 
   2  28   1    1.52    0.37 
   3 -28   1    1.16    0.38 
   3 -28   1    2.01    0.54 
   3 -28   1    1.86    0.66 
   3  28   1    1.51    0.48 
  -3  28  -1    1.02    0.50 
  -3  28  -1    1.17    0.33 
   3  28   1    1.80    0.56 
   3  28   1    1.98    0.51 
   3 -29  -1    1.34    0.54 
   3 -29  -1    0.49    0.25 
  -3 -29   1    1.32    0.40 
   3 -29  -1    1.38    0.57 
  -3  29   1    1.40    0.51 
   3  29  -1    1.40    0.48 
  -3  29   1    0.88    0.40 
   2 -29  -1    1.79    0.69 
  -2 -29   1    0.92    0.33 
   2 -29  -1    0.74    0.44 
   2 -29  -1    1.94    0.72 
   2 -29  -1    0.57    0.66 
  -2  29   1    0.72    0.48 
  -2  29   1    1.45    0.60 
   2  29  -1    0.54    0.37 
   2  29  -1    0.93    0.30 
   1 -29  -1   13.83    1.17 
   1 -29  -1   12.66    1.00 
   1 -29  -1   11.68    1.16 
  -1 -29   1   12.47    1.15 
   1 -29  -1   13.57    1.47 
  -1  29   1   11.67    1.02 
  -1  29   1   11.91    1.05 
   0 -29   1    1.50    0.45 
   0 -29  -1    2.00    0.73 
   0 -29   1    3.16    0.70 
   0 -29  -1    1.21    0.41 
   0  29   1    2.17    0.55 
   0  29   1    2.03    0.55 
   0  29  -1    2.02    0.82 
   0  29  -1    1.97    0.61 
   1 -29   1   16.09    1.42 
   1 -29   1   15.93    1.25 
   1 -29   1   16.85    1.32 
  -1 -29  -1   17.31    1.43 
   1 -29   1   18.07    1.27 
  -1 -29  -1   17.36    1.20 
  -1  29  -1   18.90    1.36 
  -1  29  -1   19.53    1.46 
  -1  29  -1   18.86    1.34 
   1  29   1   17.92    1.25 
   2 -29   1   -0.02    0.54 
   2 -29   1    1.49    0.69 
  -2 -29  -1    1.22    0.38 
  -2  29  -1    0.91    0.54 
  -2  29  -1    1.29    0.53 
  -2  29  -1    0.26    0.47 
   2  29   1    2.20    0.42 
   2  29   1    1.61    0.33 
   3 -29   1    2.23    0.59 
   3 -29   1    2.00    0.32 
   3 -29   1    2.49    0.42 
  -3 -29  -1    1.87    0.45 
   3 -29   1    2.37    0.49 
   3  29   1    1.78    0.42 
  -3  29  -1    2.41    0.53 
   3  29   1    2.02    0.49 
   2 -30  -1    6.91    0.71 
  -2 -30   1    8.25    0.59 
   2 -30  -1    6.04    0.75 
   2 -30  -1    7.28    0.64 
   2  30  -1    6.29    0.55 
  -2  30   1    6.56    0.71 
   2  30  -1    6.47    0.51 
  -2  30   1    5.51    0.68 
  -1 -30   1    3.05    0.56 
   1 -30  -1    3.95    0.76 
   1 -30  -1    3.30    0.99 
   1 -30  -1    3.37    0.55 
   1 -30  -1    3.46    0.60 
   1 -30  -1    3.82    0.70 
  -1 -30   1    3.88    0.76 
   1  30  -1    3.35    0.60 
  -1  30   1    3.20    0.59 
  -1  30   1    3.34    0.59 
   0 -30   1   18.19    1.28 
   0 -30  -1   17.22    1.29 
   0 -30  -1   16.18    1.17 
   0  30  -1   17.98    1.35 
   0  30  -1   16.80    1.24 
   0  30  -1   18.58    1.22 
   1 -30   1    7.26    0.91 
   1 -30   1    7.36    0.76 
  -1 -30  -1    7.28    0.82 
   1  30   1    8.01    0.63 
  -1  30  -1    8.75    0.82 
   1  30   1    7.87    0.69 
  -1  30  -1    7.71    0.90 
  -1  30  -1    7.74    0.78 
   2 -30   1   10.09    0.91 
   2 -30   1    9.53    0.78 
  -2 -30  -1   10.47    0.76 
   2 -30   1   10.14    0.97 
   2  30   1   10.40    0.68 
  -2  30  -1   10.21    0.84 
  -2  30  -1   10.09    0.87 
   2  30   1   10.30    0.72 
   2 -31  -1    3.40    0.62 
   2 -31  -1    3.47    0.53 
   2  31  -1    3.36    0.35 
   2  31  -1    3.55    0.32 
  -2  31   1    3.19    0.55 
  -2  31   1    3.45    0.47 
   1 -31  -1    3.07    0.58 
  -1 -31   1    2.44    0.43 
   1 -31  -1    3.14    0.71 
  -1 -31   1    2.97    0.64 
   1 -31  -1    3.09    0.65 
  -1  31   1    3.15    0.52 
   1  31  -1    3.34    0.46 
  -1  31   1    3.30    0.48 
   1  31  -1    3.13    0.49 
   0 -31  -1    4.39    0.67 
   0 -31   1    5.46    0.65 
   1 -31   1    3.30    0.65 
  -1 -31  -1    2.99    0.51 
  -1 -31  -1    3.55    0.62 
   1 -31   1    2.30    0.65 
  -1  31  -1    2.86    0.50 
  -1  31  -1    3.23    0.52 
   1  31   1    3.66    0.47 
   1  31   1    3.48    0.40 
   2 -31   1    1.89    0.53 
   2 -31   1    1.91    0.50 
   2 -31   1    1.36    0.41 
   2  31   1    1.85    0.36 
  -2  31  -1    2.02    0.58 
  -2  31  -1    2.18    0.48 
  -1 -32   1    7.28    0.70 
   1  32  -1    6.78    0.74 
   0 -32   1    1.26    0.47 
   0 -32   1    0.66    0.33 
   0 -32   1    0.56    0.29 
   0 -32  -1    0.55    0.33 
  -1 -32  -1    6.81    0.71 
  -1  32  -1    7.79    0.61 
  -1  32  -1    7.09    0.70 
   1  32   1    6.69    0.53 
   1  32   1    7.10    0.57 
   7   0  -2    3.05    0.31 
   7   0  -2    2.70    0.75 
   7   0  -2    2.87    1.14 
   6   0  -2    0.71    0.70 
   6   0  -2    2.48    0.64 
   6   0  -2    2.15    0.93 
   6   0  -2    1.22    0.34 
   6   0  -2    1.84    0.80 
   6   0  -2    1.13    0.97 
   5   0  -2    1.16    0.88 
  -5   0   2    1.99    0.75 
   4   0  -2    8.69    1.14 
  -4   0   2    9.22    1.05 
   4   0  -2    9.19    1.47 
   4   0  -2    9.98    0.74 
  -4   0   2    8.73    0.92 
   4   0  -2    8.15    0.89 
  -3   0   2   46.33    2.89 
   3   0  -2   41.88    2.89 
  -3   0   2   38.99    2.88 
  -3   0   2   44.80    2.76 
   3   0  -2   43.75    2.87 
  -3   0   2   41.03    2.82 
   3   0  -2   43.08    3.00 
   3   0  -2   43.60    2.87 
   2   0  -2   39.73    2.74 
  -2   0   2   43.46    2.68 
  -2   0   2   43.23    2.71 
   2   0  -2   42.68    2.64 
   2   0  -2   41.22    2.78 
   2   0  -2   41.19    2.70 
   2   0  -2   41.16    2.53 
   2   0  -2   40.93    2.79 
   2   0  -2   39.80    2.54 
  -2   0   2   39.59    2.59 
   2   0  -2   44.34    2.75 
  -2   0   2   38.55    2.59 
  -1   0   2  120.92    7.05 
   1   0  -2  113.89    7.04 
  -1   0   2  115.56    7.05 
   1   0  -2  120.93    7.03 
  -1   0   2  117.66    7.11 
  -1   0   2  116.57    7.03 
   1   0  -2  118.51    7.06 
  -1   0   2  116.53    7.13 
   1   0  -2  102.11    7.27 
   1   0  -2  117.17    7.04 
   1   0  -2  110.05    7.05 
   1   0  -2  117.74    7.04 
   1   0  -2  113.69    7.04 
  -1   0   2  116.74    7.09 
   1   0  -2  119.87    7.02 
  -1   0   2  121.94    7.03 
   1   0  -2  123.24    7.15 
   1   0  -2  121.98    7.02 
   1   0  -2  112.28    7.05 
   1   0  -2  117.11    7.10 
   1   0  -2  119.53    7.03 
   1   0  -2  112.05    7.17 
  -1   0   2  116.98    7.04 
  -1   0   2  116.27    7.02 
   1   0  -2  118.29    7.10 
  -1   0   2  115.18    7.09 
   1   0  -2  110.50    7.10 
   0   0  -2    1.01    0.30 
   0   0  -2    1.29    0.39 
   0   0  -2    1.52    0.28 
   0   0   2    0.94    0.29 
   0   0   2    1.33    0.27 
   0   0  -2    0.90    0.21 
   0   0  -2    1.07    0.20 
   0   0   2    1.30    0.31 
   0   0   2    0.56    0.18 
   0   0  -2    1.23    0.27 
   0   0  -2    1.09    0.24 
   0   0   2    1.27    0.26 
   0   0   2    1.09    0.20 
   0   0   2    1.21    0.22 
   0   0   2    1.19    0.28 
   0   0  -2    0.57    0.17 
   0   0   2    1.18    0.27 
   0   0   2    1.19    0.27 
   0   0   2    0.87    0.19 
   0   0  -2    1.15    0.36 
   0   0   2    0.83    0.28 
   0   0  -2    0.77    0.27 
   0   0   2    1.27    0.32 
   0   0   2    1.49    0.26 
  -1   0  -2   97.18    5.76 
   1   0   2   93.35    5.79 
   1   0   2  100.46    5.80 
   1   0   2   98.67    5.80 
  -1   0  -2   96.39    5.76 
  -1   0  -2   87.78    5.78 
   1   0   2   96.51    5.79 
  -1   0  -2   97.18    5.78 
  -1   0  -2   95.44    5.81 
   2   0   2   26.55    1.88 
   3   0   2   49.40    3.30 
   4   0   2    5.10    1.21 
  -5   0  -2    1.78    0.44 
   5   0   2    4.61    1.55 
   6   0   2    1.50    0.89 
   6   0   2    0.74    1.12 
   6   0   2    1.25    0.89 
   7  -1  -2    2.04    0.72 
   7  -1  -2    3.52    1.14 
   7  -1  -2    3.25    0.38 
   7   1  -2    3.08    0.77 
   7   1  -2    4.37    1.18 
   6  -1  -2    2.82    0.45 
   6  -1  -2    3.24    0.86 
   6  -1  -2    3.06    0.90 
   6  -1  -2    1.79    0.61 
   6  -1  -2    2.40    0.49 
   6  -1  -2    3.44    1.20 
   6  -1  -2    2.97    1.19 
   6   1  -2    2.66    0.92 
   6   1  -2    2.20    0.79 
   6   1  -2    2.10    0.62 
   6   1  -2    2.30    1.01 
   6   1  -2    2.65    0.44 
   6   1  -2    3.65    1.19 
  -5  -1   2   10.54    1.17 
   5  -1  -2   11.98    1.54 
   5   1  -2   11.66    1.37 
  -5   1   2   12.52    1.13 
  -4  -1   2    8.16    0.84 
  -4  -1   2    5.23    0.93 
   4  -1  -2    6.79    1.01 
   4  -1  -2    6.47    1.36 
   4  -1  -2    6.24    0.79 
   4  -1  -2    7.36    0.67 
  -4   1   2    8.63    1.32 
   4   1  -2    5.67    1.40 
   4   1  -2    7.11    1.06 
  -4   1   2    5.43    0.81 
   4   1  -2    7.22    0.63 
   4   1  -2    6.85    0.78 
   3  -1  -2   86.20    6.05 
  -3  -1   2   99.22    6.02 
  -3  -1   2   95.89    5.95 
  -3  -1   2   99.41    6.07 
   3  -1  -2   93.72    6.05 
   3  -1  -2   94.72    6.04 
  -3  -1   2  101.39    6.09 
   3  -1  -2   93.50    6.16 
  -3   1   2  101.88    5.95 
   3   1  -2   95.00    6.02 
   3   1  -2   95.46    6.16 
   3   1  -2   94.15    6.04 
  -3   1   2   99.98    6.06 
  -3   1   2  101.28    6.09 
   3   1  -2   92.33    6.05 
  -3   1   2  103.01    6.06 
   2  -1  -2   24.63    1.62 
   2  -1  -2   25.51    1.61 
   2  -1  -2   26.32    1.73 
   2  -1  -2   25.24    1.78 
  -2  -1   2   27.71    1.79 
  -2  -1   2   25.81    1.77 
   2  -1  -2   25.82    1.89 
   2  -1  -2   25.79    1.84 
   2  -1  -2   25.10    1.86 
  -2  -1   2   24.38    1.67 
  -2  -1   2   25.44    1.81 
  -2  -1   2   23.66    1.66 
  -2   1   2   26.84    1.78 
   2   1  -2   25.71    1.79 
  -2   1   2   22.93    1.67 
  -2   1   2   24.87    1.67 
   2   1  -2   24.76    1.59 
   2   1  -2   25.69    1.91 
   2   1  -2   26.16    1.72 
   2   1  -2   26.43    1.82 
  -2   1   2   25.74    1.81 
   2   1  -2   26.41    1.60 
   2   1  -2   24.82    1.76 
   2   1  -2   26.22    1.82 
   1  -1  -2   75.31    4.79 
  -1  -1   2   80.44    4.78 
   1  -1  -2   81.71    4.95 
   1  -1  -2   77.40    4.80 
   1  -1  -2   77.71    4.87 
  -1  -1   2   80.74    4.78 
   1  -1  -2   74.62    4.80 
   1  -1  -2   81.66    4.86 
  -1  -1   2   79.14    4.80 
  -1  -1   2   75.79    4.81 
   1  -1  -2   81.24    4.78 
   1  -1  -2   79.35    4.78 
   1  -1  -2   68.04    4.80 
  -1  -1   2   76.97    4.86 
  -1  -1   2   82.58    4.78 
  -1  -1   2   72.44    4.80 
   1  -1  -2   78.71    4.81 
   1  -1  -2   79.26    4.86 
   1  -1  -2   80.56    4.90 
  -1  -1   2   78.68    4.89 
   1  -1  -2   80.13    4.78 
   1  -1  -2   77.17    4.80 
  -1  -1   2   77.02    4.85 
  -1  -1   2   80.22    4.85 
  -1  -1   2   80.22    4.80 
   1  -1  -2   74.01    4.88 
   1  -1  -2   80.24    4.78 
   1  -1  -2   76.98    4.80 
  -1   1   2   83.79    4.85 
  -1   1   2   79.20    4.89 
   1   1  -2   77.41    4.80 
  -1   1   2   79.92    4.79 
   1   1  -2   84.04    4.88 
   1   1  -2   79.24    4.77 
   1   1  -2   76.89    4.81 
   1   1  -2   80.23    4.80 
  -1   1   2   80.35    4.78 
   1   1  -2   79.18    4.80 
   1   1  -2   79.78    4.80 
  -1   1   2   78.96    4.78 
   1   1  -2   80.31    4.86 
  -1   1   2   80.09    4.87 
  -1   1   2   82.73    4.80 
   1   1  -2   65.91    5.02 
  -1   1   2   76.41    4.82 
   1   1  -2   77.82    4.81 
  -1   1   2   81.39    4.81 
   1   1  -2   80.93    4.80 
   1   1  -2   79.46    4.77 
  -1   1   2   75.39    4.80 
   1   1  -2   81.67    4.85 
   1   1  -2   83.15    4.91 
   1   1  -2   72.86    4.94 
  -1   1   2   81.17    4.85 
   1   1  -2   81.65    4.85 
   1   1  -2   82.37    4.78 
   1   1  -2   83.22    4.78 
   0  -1  -2  211.43   13.19 
   0  -1   2  222.66   13.18 
   0  -1   2  221.25   13.18 
   0  -1   2  212.07   13.22 
   0  -1  -2  205.03   13.22 
   0  -1   2  218.19   13.22 
   0  -1   2  212.11   13.20 
   0  -1  -2  210.88   13.18 
   0  -1  -2  223.05   13.18 
   0  -1  -2  215.48   13.24 
   0  -1   2  236.34   13.18 
   0  -1   2  217.93   13.19 
   0  -1   2  221.07   13.19 
   0  -1   2  217.08   13.19 
   0  -1  -2  226.89   13.18 
   0  -1   2  212.43   13.19 
   0  -1  -2  220.34   13.19 
   0  -1  -2  218.74   13.23 
   0  -1  -2  219.96   13.25 
   0  -1  -2  215.83   13.20 
   0  -1   2  208.48   13.24 
   0  -1  -2  215.59   13.18 
   0  -1   2  223.81   13.18 
   0  -1   2  214.76   13.18 
   0   1  -2  218.01   13.19 
   0   1   2  214.50   13.23 
   0   1  -2  227.80   13.22 
   0   1  -2  218.79   13.20 
   0   1  -2  207.75   13.19 
   0   1   2  222.76   13.22 
   0   1  -2  230.81   13.18 
   0   1  -2  211.02   13.22 
   0   1   2  222.94   13.19 
   0   1   2  220.65   13.19 
   0   1   2  225.79   13.22 
   0   1   2  218.18   13.18 
   0   1   2  234.36   13.18 
   0   1   2  220.06   13.25 
   0   1   2  227.56   13.18 
   0   1   2  224.44   13.18 
   0   1  -2  223.21   13.18 
   0   1   2  227.96   13.19 
   0   1   2  219.20   13.18 
   0   1  -2  222.50   13.26 
   0   1  -2  215.92   13.23 
   0   1   2  230.57   13.18 
   0   1  -2  217.70   13.18 
   0   1  -2  220.96   13.24 
   0   1  -2  213.87   13.18 
   0   1   2  223.00   13.19 
  -1  -1  -2   62.04    3.61 
   1  -1   2   57.46    3.62 
   1  -1   2   61.70    3.64 
   1  -1   2   60.90    3.61 
  -1  -1  -2   61.25    3.58 
  -1  -1  -2   59.04    3.63 
  -1  -1  -2   58.73    3.60 
  -1  -1  -2   58.97    3.58 
  -1  -1  -2   56.89    3.70 
   1  -1   2   61.50    3.62 
   1  -1   2   61.18    3.63 
  -1   1  -2   55.47    3.61 
  -1   1  -2   56.92    3.63 
  -1   1  -2   57.34    3.58 
  -1   1  -2   57.77    3.62 
   1   1   2   58.39    3.61 
  -1   1  -2   60.32    3.59 
   1   1   2   58.83    3.62 
  -1   1  -2   58.86    3.58 
  -1   1  -2   62.49    3.59 
  -1   1  -2   60.44    3.61 
   1   1   2   59.44    3.63 
   2  -1   2   18.66    1.40 
   2   1   2   18.32    1.43 
   2   1   2   16.87    1.61 
   3  -1   2  116.20    7.09 
   3   1   2  111.10    7.11 
   4  -1   2    3.61    1.19 
   4   1   2    5.80    1.28 
   5  -1   2    8.29    1.17 
  -5  -1  -2    6.58    0.66 
  -5   1  -2    7.99    0.72 
   5   1   2   11.12    1.76 
   6  -1   2    1.64    0.90 
   6  -1   2    1.67    1.18 
   6  -1   2    3.83    1.32 
   6   1   2    3.12    1.43 
   6   1   2    2.70    1.02 
   6   1   2    4.19    1.28 
   7  -2  -2    2.42    0.91 
   7  -2  -2    3.23    0.34 
   7  -2  -2    2.86    0.35 
   7  -2  -2    2.25    0.71 
   7   2  -2    3.25    1.11 
   7   2  -2    2.39    0.74 
   6  -2  -2    3.03    0.90 
   6  -2  -2    4.66    1.17 
   6  -2  -2    2.69    0.97 
   6  -2  -2    3.92    1.19 
   6  -2  -2    2.95    0.48 
   6  -2  -2    4.25    0.48 
   6  -2  -2    4.35    1.28 
   6  -2  -2    3.56    0.74 
   6   2  -2    4.63    1.38 
   6   2  -2    4.53    0.47 
   6   2  -2    5.49    0.95 
   6   2  -2    3.50    1.13 
   6   2  -2    4.77    1.01 
  -5  -2   2   17.86    1.44 
   5  -2  -2   13.12    1.75 
   5   2  -2   17.95    1.60 
  -5   2   2   17.14    1.46 
  -4  -2   2    4.73    0.77 
  -4  -2   2    3.85    0.88 
   4  -2  -2    4.66    1.28 
   4  -2  -2    4.34    1.02 
   4  -2  -2    4.21    0.60 
   4  -2  -2    4.02    0.72 
   4   2  -2    4.68    0.93 
   4   2  -2    5.25    0.67 
   4   2  -2    4.10    1.32 
  -4   2   2    4.70    0.73 
   4   2  -2    3.33    0.57 
   3  -2  -2   66.11    4.18 
  -3  -2   2   66.18    4.04 
   3  -2  -2   67.08    4.29 
  -3  -2   2   65.61    4.16 
   3  -2  -2   64.45    4.18 
   3  -2  -2   61.64    4.16 
  -3  -2   2   63.17    4.17 
  -3  -2   2   56.58    4.15 
   3   2  -2   62.96    4.14 
   3   2  -2   65.50    4.29 
  -3   2   2   70.75    4.04 
   3   2  -2   58.54    4.14 
   3   2  -2   64.54    4.13 
  -3   2   2   66.62    4.19 
  -3   2   2   70.24    4.18 
  -3   2   2   65.84    4.12 
   2  -2  -2   27.46    1.74 
  -2  -2   2   30.11    1.91 
   2  -2  -2   25.54    1.72 
   2  -2  -2   29.32    1.97 
   2  -2  -2   26.14    1.89 
   2  -2  -2   26.19    1.73 
  -2  -2   2   28.07    1.78 
   2  -2  -2   27.42    1.74 
  -2  -2   2   29.82    1.94 
   2  -2  -2   27.56    1.75 
   2  -2  -2   28.55    2.04 
  -2  -2   2   27.88    1.80 
  -2  -2   2   29.09    1.90 
   2   2  -2   26.46    1.72 
   2   2  -2   26.91    1.71 
  -2   2   2   28.83    1.92 
   2   2  -2   28.56    1.96 
   2   2  -2   29.16    1.93 
  -2   2   2   27.41    1.87 
   2   2  -2   25.45    1.88 
  -2   2   2   25.22    1.79 
   2   2  -2   27.59    2.00 
   2   2  -2   26.18    1.95 
   2   2  -2   27.60    1.89 
  -2   2   2   26.17    1.79 
   1  -2  -2   28.70    1.94 
  -1  -2   2   27.42    2.03 
   1  -2  -2   29.75    1.91 
   1  -2  -2   26.67    1.90 
   1  -2  -2   26.91    1.94 
   1  -2  -2   28.38    1.93 
   1  -2  -2   28.80    2.01 
   1  -2  -2   27.88    2.05 
  -1  -2   2   27.15    2.00 
  -1  -2   2   29.42    1.93 
   1  -2  -2   29.45    1.91 
  -1  -2   2   28.11    2.07 
   1  -2  -2   29.71    2.00 
   1  -2  -2   28.71    1.95 
   1  -2  -2   29.33    1.95 
   1  -2  -2   28.42    2.05 
   1  -2  -2   29.74    1.95 
   1  -2  -2   29.44    2.09 
  -1  -2   2   28.08    1.94 
  -1  -2   2   30.14    1.92 
   1  -2  -2   26.83    2.13 
  -1  -2   2   28.66    1.92 
  -1  -2   2   29.10    1.91 
   1  -2  -2   28.14    1.90 
  -1  -2   2   27.40    1.95 
   1  -2  -2   28.92    1.95 
  -1  -2   2   28.68    2.02 
  -1  -2   2   30.61    1.90 
   1   2  -2   30.87    2.01 
   1   2  -2   32.03    1.98 
  -1   2   2   28.88    1.95 
   1   2  -2   33.77    2.15 
  -1   2   2   31.60    1.91 
  -1   2   2   33.55    1.92 
   1   2  -2   33.52    1.94 
  -1   2   2   33.09    2.04 
   1   2  -2   31.83    1.91 
   1   2  -2   34.21    2.03 
   1   2  -2   34.97    1.91 
  -1   2   2   32.25    1.95 
   1   2  -2   31.29    1.94 
   1   2  -2   31.65    1.93 
   1   2  -2   35.25    2.09 
  -1   2   2   31.16    1.94 
  -1   2   2   33.51    1.94 
   1   2  -2   33.11    2.00 
   1   2  -2   31.66    1.96 
   1   2  -2   30.30    1.95 
   1   2  -2   31.90    1.90 
   1   2  -2   33.01    1.95 
   1   2  -2   30.61    2.04 
  -1   2   2   34.36    2.01 
  -1   2   2   31.91    2.05 
   1   2  -2   32.13    1.95 
  -1   2   2   31.83    1.90 
   1   2  -2   31.79    1.91 
  -1   2   2   31.49    2.00 
   0  -2   2  305.84   18.00 
   0  -2   2  327.05   18.02 
   0  -2   2  303.51   18.00 
   0  -2   2  315.49   18.00 
   0  -2  -2  302.85   18.08 
   0  -2   2  295.46   18.01 
   0  -2   2  289.61   18.01 
   0  -2   2  280.08   18.01 
   0  -2  -2  295.36   18.01 
   0  -2   2  284.91   18.01 
   0  -2  -2  302.42   18.02 
   0  -2   2  306.27   18.05 
   0  -2  -2  294.29   18.04 
   0  -2   2  281.28   18.04 
   0  -2  -2  293.00   18.06 
   0  -2  -2  297.07   18.00 
   0  -2  -2  310.43   18.01 
   0  -2  -2  312.02   18.00 
   0  -2  -2  309.61   18.00 
   0  -2   2  290.33   18.01 
   0  -2   2  296.64   18.00 
   0  -2  -2  301.10   18.14 
   0  -2  -2  289.50   18.01 
   0  -2   2  290.46   18.07 
   0  -2  -2  284.19   18.05 
   0   2  -2  298.44   18.02 
   0   2  -2  302.67   18.02 
   0   2   2  301.97   18.01 
   0   2  -2  286.47   18.05 
   0   2   2  294.85   18.01 
   0   2   2  313.45   18.05 
   0   2   2  306.13   18.00 
   0   2   2  327.44   18.00 
   0   2   2  304.65   18.01 
   0   2  -2  318.74   18.00 
   0   2   2  295.50   18.01 
   0   2   2  310.25   18.00 
   0   2  -2  268.46   18.02 
   0   2  -2  318.08   18.05 
   0   2   2  306.40   18.00 
   0   2  -2  307.87   18.00 
   0   2   2  293.55   18.05 
   0   2  -2  303.86   18.01 
   0   2  -2  314.79   18.00 
   0   2  -2  304.31   18.09 
   0   2   2  294.79   18.04 
   0   2  -2  297.48   18.04 
   0   2   2  279.49   18.07 
   0   2   2  304.59   18.02 
   0   2   2  306.59   18.01 
   0   2  -2  287.91   18.00 
  -1  -2  -2   42.77    2.43 
   1  -2   2   42.08    2.47 
  -1  -2  -2   41.45    2.48 
   1  -2   2   44.07    2.50 
   1  -2   2   41.52    2.49 
  -1  -2  -2   38.70    2.45 
  -1  -2  -2   42.56    2.55 
  -1  -2  -2   41.37    2.42 
   1  -2   2   38.90    2.42 
   1  -2   2   42.04    2.48 
  -1  -2  -2   41.03    2.42 
  -1  -2  -2   40.48    2.42 
  -1  -2  -2   42.20    2.47 
   1  -2   2   41.58    2.42 
  -1   2  -2   36.17    2.47 
  -1   2  -2   34.75    2.42 
  -1   2  -2   37.30    2.48 
   1   2   2   38.99    2.48 
  -1   2  -2   39.12    2.43 
  -1   2  -2   40.83    2.44 
   1   2   2   36.22    2.45 
   1   2   2   37.56    2.46 
  -1   2  -2   40.11    2.44 
   1   2   2   39.54    2.61 
  -1   2  -2   36.85    2.49 
   1   2   2   39.31    2.47 
  -1   2  -2   39.05    2.43 
   2  -2   2   35.24    2.16 
   2  -2   2   33.08    2.33 
   2  -2   2   37.44    2.19 
   2   2   2   34.84    2.37 
   2   2   2   33.42    2.47 
   3  -2   2   80.86    5.07 
   3   2   2   78.05    5.09 
   4   2   2    8.55    1.33 
  -4   2  -2    8.12    0.63 
   5  -2   2   19.26    1.75 
   5   2   2   21.63    1.95 
  -5   2  -2   20.30    1.42 
   6  -2   2    4.20    1.24 
   6  -2   2    4.08    1.47 
   6  -2   2    3.66    0.35 
   6  -2   2    4.38    1.61 
   6   2   2    4.64    1.09 
   6   2   2    4.24    1.47 
   7  -3  -2    0.13    0.21 
   7  -3  -2    0.03    0.67 
   7  -3  -2    0.54    0.74 
   7   3  -2    0.33    0.59 
   7   3  -2    1.31    0.93 
   6  -3  -2    7.41    1.40 
   6  -3  -2    6.87    0.67 
   6  -3  -2    6.87    0.99 
   6  -3  -2    5.74    0.86 
   6  -3  -2    6.84    0.60 
   6  -3  -2    5.14    1.21 
   6  -3  -2    7.78    1.29 
   6  -3  -2    6.69    1.04 
   6   3  -2    8.78    1.08 
   6   3  -2    7.71    0.58 
   6   3  -2    7.37    1.38 
   5  -3  -2    9.77    1.57 
  -5  -3   2    9.86    1.15 
  -5   3   2   12.25    1.18 
   5   3  -2   12.25    1.34 
  -4  -3   2   27.12    2.37 
   4  -3  -2   29.44    2.08 
   4  -3  -2   28.52    1.82 
  -4  -3   2   30.99    1.99 
   4  -3  -2   25.36    2.35 
   4  -3  -2   26.18    1.93 
   4   3  -2   25.78    2.03 
   4   3  -2   30.42    1.77 
   4   3  -2   25.35    2.38 
   4   3  -2   29.73    1.81 
  -4   3   2   26.81    1.95 
   4   3  -2   28.29    1.90 
   4   3  -2   25.48    2.03 
  -3  -3   2   13.60    1.29 
   3  -3  -2   14.27    1.41 
   3  -3  -2   12.90    1.26 
   3  -3  -2   10.56    1.15 
  -3  -3   2   13.40    1.15 
  -3  -3   2   13.53    1.05 
  -3  -3   2   13.97    1.21 
   3  -3  -2   11.11    1.17 
   3   3  -2   12.21    1.16 
  -3   3   2   13.72    1.18 
   3   3  -2    9.85    1.15 
  -3   3   2   12.76    1.22 
   3   3  -2   12.41    1.40 
  -3   3   2   15.32    1.25 
  -3   3   2   13.65    1.03 
   3   3  -2   13.37    1.18 
   2  -3  -2   17.91    1.42 
   2  -3  -2   16.47    1.16 
   2  -3  -2   16.27    1.18 
  -2  -3   2   18.59    1.35 
   2  -3  -2   16.70    1.51 
  -2  -3   2   19.58    1.33 
  -2  -3   2   17.42    1.22 
   2  -3  -2   16.96    1.33 
   2  -3  -2   17.14    1.16 
  -2  -3   2   19.63    1.39 
   2  -3  -2   18.06    1.17 
  -2  -3   2   19.05    1.20 
  -2   3   2   18.51    1.33 
   2   3  -2   15.73    1.12 
   2   3  -2   17.78    1.39 
  -2   3   2   17.37    1.22 
   2   3  -2   16.10    1.13 
  -2   3   2   16.18    1.20 
   2   3  -2   16.48    1.40 
   2   3  -2   17.78    1.48 
   2   3  -2   18.08    1.37 
   2   3  -2   17.16    1.34 
  -2   3   2   12.87    1.51 
  -2   3   2   17.04    1.36 
   1  -3  -2  167.35   10.63 
  -1  -3   2  169.24   10.61 
   1  -3  -2  179.38   10.55 
  -1  -3   2  173.75   10.56 
  -1  -3   2  163.64   10.56 
   1  -3  -2  165.65   10.62 
   1  -3  -2  174.67   10.58 
   1  -3  -2  168.76   10.64 
   1  -3  -2  173.56   10.55 
   1  -3  -2  178.90   10.57 
   1  -3  -2  178.99   10.76 
  -1  -3   2  179.55   10.55 
   1  -3  -2  182.58   10.68 
  -1  -3   2  186.57   10.54 
  -1  -3   2  176.78   10.54 
   1  -3  -2  174.79   10.57 
   1  -3  -2  168.14   10.57 
   1  -3  -2  166.11   10.62 
   1  -3  -2  167.79   10.54 
  -1  -3   2  170.70   10.64 
  -1  -3   2  179.82   10.57 
   1  -3  -2  183.02   10.57 
  -1  -3   2  179.56   10.56 
   1  -3  -2  176.33   10.56 
   1  -3  -2  170.16   10.58 
  -1  -3   2  170.79   10.64 
  -1  -3   2  172.02   10.62 
   1  -3  -2  185.61   10.54 
   1  -3  -2  177.16   10.70 
   1   3  -2  172.87   10.55 
   1   3  -2  171.11   10.56 
  -1   3   2  175.69   10.56 
   1   3  -2  170.02   10.61 
   1   3  -2  180.04   10.71 
   1   3  -2  165.47   10.57 
  -1   3   2  167.12   10.61 
   1   3  -2  187.74   10.63 
   1   3  -2  183.70   10.54 
   1   3  -2  177.54   10.55 
   1   3  -2  178.08   10.54 
  -1   3   2  180.78   10.54 
   1   3  -2  179.56   10.58 
  -1   3   2  180.74   10.58 
   1   3  -2  176.33   10.56 
   1   3  -2  188.48   10.67 
   1   3  -2  174.77   10.60 
   1   3  -2  164.66   10.62 
   1   3  -2  177.51   10.56 
  -1   3   2  179.62   10.56 
  -1   3   2  173.01   10.61 
   1   3  -2  176.70   10.54 
  -1   3   2  167.13   10.57 
  -1   3   2  177.50   10.63 
   1   3  -2  176.26   10.61 
  -1   3   2  171.90   10.54 
   1   3  -2  183.99   10.54 
  -1   3   2  162.80   10.57 
   0  -3  -2   80.08    5.08 
   0  -3  -2   83.76    5.04 
   0  -3   2   80.85    5.07 
   0  -3  -2   83.93    5.19 
   0  -3   2   85.73    5.01 
   0  -3  -2   84.49    5.02 
   0  -3   2   83.36    5.06 
   0  -3   2   86.50    5.03 
   0  -3   2   84.72    5.09 
   0  -3   2   80.56    5.01 
   0  -3   2   79.02    5.08 
   0  -3   2   78.98    5.03 
   0  -3   2   81.90    5.01 
   0  -3  -2   84.38    5.03 
   0  -3  -2   84.32    5.01 
   0  -3   2   83.11    5.01 
   0  -3  -2   85.26    5.01 
   0  -3   2   78.74    5.03 
   0  -3   2   82.36    5.02 
   0  -3  -2   82.93    5.03 
   0  -3  -2   76.74    5.06 
   0  -3  -2   80.22    5.09 
   0  -3  -2   83.97    5.11 
   0  -3   2   84.92    5.07 
   0  -3  -2   87.69    5.04 
   0  -3   2   82.64    5.02 
   0  -3  -2   78.71    5.01 
   0  -3   2   84.15    5.02 
   0   3   2   83.74    5.01 
   0   3  -2   84.44    5.12 
   0   3   2   83.48    5.01 
   0   3  -2   84.73    5.01 
   0   3   2   80.19    5.06 
   0   3   2   88.89    5.08 
   0   3  -2   77.98    5.04 
   0   3   2   78.02    5.02 
   0   3  -2   88.03    5.02 
   0   3  -2   78.62    5.02 
   0   3  -2   81.16    5.03 
   0   3  -2   81.94    5.02 
   0   3  -2   86.94    5.01 
   0   3   2   85.94    5.02 
   0   3   2   85.94    5.01 
   0   3   2   82.80    5.08 
   0   3  -2   86.23    5.07 
   0   3   2   78.13    5.01 
   0   3  -2   79.42    5.08 
   0   3  -2   83.72    5.07 
   0   3  -2   82.86    5.03 
   0   3   2   83.55    5.03 
   0   3   2   81.61    5.03 
   0   3   2   84.27    5.01 
   0   3   2   85.82    5.07 
   1  -3   2  149.02    9.16 
   1  -3   2  155.26    9.20 
  -1  -3  -2  150.99    9.17 
   1  -3   2  157.26    9.18 
   1  -3   2  146.48    9.12 
  -1  -3  -2  153.12    9.12 
  -1  -3  -2  161.98    9.14 
  -1  -3  -2  155.14    9.13 
  -1  -3  -2  153.09    9.13 
   1  -3   2  150.62    9.20 
  -1  -3  -2  149.31    9.23 
   1  -3   2  152.06    9.17 
   1  -3   2  141.39    9.13 
  -1  -3  -2  151.19    9.18 
  -1  -3  -2  156.56    9.13 
   1   3   2  153.69    9.18 
  -1   3  -2  150.90    9.13 
  -1   3  -2  153.72    9.19 
  -1   3  -2  145.44    9.19 
   1   3   2  161.14    9.19 
   1   3   2  150.41    9.29 
  -1   3  -2  148.06    9.17 
   1   3   2  156.90    9.11 
  -1   3  -2  152.38    9.13 
   1   3   2  156.13    9.17 
  -1   3  -2  153.43    9.15 
  -1   3  -2  152.27    9.15 
  -1   3  -2  138.03    9.13 
   1   3   2  152.11    9.14 
  -1   3  -2  152.72    9.19 
   1   3   2  149.21    9.22 
   2  -3   2   30.63    1.91 
   2  -3   2   32.40    1.94 
   2  -3   2   27.17    2.03 
  -2   3  -2   31.07    1.87 
   2   3   2   27.39    2.21 
  -2   3  -2   30.73    1.96 
  -2   3  -2   30.72    1.91 
   2   3   2   29.12    2.10 
   3  -3   2   26.49    2.01 
   3   3   2   23.67    1.96 
   4  -3   2   29.75    1.86 
  -4   3  -2   27.92    1.80 
   4   3   2   25.58    2.37 
   5  -3   2   11.79    1.60 
  -5  -3  -2    8.21    0.79 
  -5   3  -2   10.17    0.90 
   6  -3   2    4.51    0.40 
   6  -3   2    7.61    1.51 
   6  -3   2    3.46    1.39 
   6  -3   2    4.39    0.41 
   6  -3   2    5.45    1.31 
   6   3   2    5.63    1.48 
   6   3   2    5.21    1.15 
   7  -4  -2    7.59    0.55 
   7  -4  -2    4.89    1.01 
   7   4  -2    7.94    1.25 
   7   4  -2    6.98    0.86 
   6  -4  -2   18.62    1.60 
   6  -4  -2   20.80    1.68 
   6  -4  -2   20.56    1.80 
   6  -4  -2   22.03    1.84 
   6  -4  -2   19.38    1.46 
   6  -4  -2   22.27    1.41 
   6  -4  -2   22.85    1.37 
   6  -4  -2   17.62    1.95 
   6   4  -2   21.95    1.84 
   6   4  -2   19.89    1.68 
   6   4  -2   23.78    2.11 
   6   4  -2   21.88    1.47 
   6   4  -2   22.78    1.34 
   5  -4  -2   43.16    3.14 
   5  -4  -2   37.87    3.02 
   5   4  -2   40.21    2.91 
  -4  -4   2   28.53    1.95 
  -4  -4   2   31.01    2.33 
   4  -4  -2   25.84    1.77 
   4  -4  -2   23.54    2.16 
   4  -4  -2   23.10    2.30 
   4  -4  -2   25.99    1.89 
   4   4  -2   30.18    1.74 
   4   4  -2   30.83    2.45 
   4   4  -2   28.24    1.88 
   4   4  -2   25.51    2.01 
  -4   4   2   24.83    1.89 
   4   4  -2   25.86    2.01 
   4   4  -2   27.47    1.70 
  -3  -4   2   21.43    1.54 
   3  -4  -2   20.31    1.67 
  -3  -4   2   21.64    1.70 
  -3  -4   2   21.76    1.62 
  -3  -4   2   23.97    1.72 
   3  -4  -2   19.52    1.69 
   3  -4  -2   15.91    1.90 
   3  -4  -2   19.55    1.68 
   3  -4  -2   22.54    1.84 
  -3   4   2   22.91    1.73 
   3   4  -2   21.58    1.68 
   3   4  -2   21.65    1.64 
  -3   4   2   22.73    1.52 
   3   4  -2   21.82    1.68 
   3   4  -2   24.36    1.89 
  -3   4   2   25.28    1.73 
  -3   4   2   24.00    1.67 
   2  -4  -2   50.86    3.14 
   2  -4  -2   49.47    3.29 
   2  -4  -2   50.06    3.34 
  -2  -4   2   50.30    3.17 
   2  -4  -2   49.48    3.14 
  -2  -4   2   49.04    3.31 
   2  -4  -2   45.55    3.16 
  -2  -4   2   50.99    3.29 
  -2  -4   2   47.44    3.18 
   2  -4  -2   49.66    3.14 
   2  -4  -2   50.39    3.12 
   2  -4  -2   47.80    3.40 
  -2  -4   2   51.91    3.30 
  -2   4   2   50.52    3.19 
   2   4  -2   54.59    3.12 
  -2   4   2   56.47    3.31 
  -2   4   2   50.25    3.35 
   2   4  -2   50.77    3.37 
  -2   4   2   53.61    3.31 
   2   4  -2   54.68    3.29 
  -2   4   2   49.52    3.17 
   2   4  -2   52.41    3.32 
   2   4  -2   50.31    3.29 
   2   4  -2   51.51    3.11 
   2   4  -2   56.43    3.34 
  -1  -4   2  419.10   25.67 
   1  -4  -2  445.46   25.79 
  -1  -4   2  416.77   25.72 
  -1  -4   2  422.85   25.75 
   1  -4  -2  466.18   25.69 
  -1  -4   2  456.13   25.68 
  -1  -4   2  443.76   25.66 
   1  -4  -2  440.67   25.66 
   1  -4  -2  425.19   25.65 
   1  -4  -2  426.56   25.67 
   1  -4  -2  421.69   25.65 
   1  -4  -2  431.66   25.73 
   1  -4  -2  413.76   25.66 
   1  -4  -2  418.28   25.73 
  -1  -4   2  422.38   25.66 
   1  -4  -2  429.53   25.65 
  -1  -4   2  440.46   25.65 
   1  -4  -2  417.72   25.85 
   1  -4  -2  395.66   25.68 
  -1  -4   2  430.75   25.73 
   1  -4  -2  444.67   25.69 
   1  -4  -2  400.26   25.72 
  -1  -4   2  414.35   25.67 
  -1  -4   2  419.35   25.76 
   1  -4  -2  424.02   25.75 
  -1  -4   2  416.87   25.64 
   1  -4  -2  428.51   25.65 
   1  -4  -2  405.30   25.81 
  -1   4   2  425.07   25.78 
   1   4  -2  433.81   25.72 
   1   4  -2  433.12   25.65 
   1   4  -2  431.73   25.72 
  -1   4   2  424.73   25.71 
   1   4  -2  435.82   25.67 
   1   4  -2  404.37   25.72 
  -1   4   2  420.04   25.68 
  -1   4   2  416.30   25.70 
   1   4  -2  410.60   25.72 
   1   4  -2  433.04   25.66 
  -1   4   2  410.25   25.67 
   1   4  -2  430.06   25.81 
   1   4  -2  433.90   25.64 
  -1   4   2  434.39   25.64 
  -1   4   2  424.46   25.68 
  -1   4   2  434.24   25.65 
   1   4  -2  405.31   25.71 
  -1   4   2  434.07   25.72 
  -1   4   2  422.35   25.66 
   1   4  -2  447.86   25.78 
   1   4  -2  427.00   25.66 
   1   4  -2  431.53   25.74 
   1   4  -2  441.14   25.69 
  -1   4   2  431.66   25.74 
   1   4  -2  444.10   25.64 
  -1   4   2  452.25   25.66 
   1   4  -2  445.45   25.66 
   1   4  -2  411.00   25.68 
   0  -4   2   28.21    1.89 
   0  -4   2   29.38    1.82 
   0  -4  -2   27.83    1.92 
   0  -4   2   26.83    1.89 
   0  -4  -2   27.15    1.83 
   0  -4   2   30.28    1.79 
   0  -4   2   29.74    1.84 
   0  -4   2   26.99    1.83 
   0  -4   2   29.46    1.80 
   0  -4   2   29.76    1.81 
   0  -4   2   31.03    1.84 
   0  -4   2   28.52    1.93 
   0  -4   2   29.25    1.80 
   0  -4  -2   28.94    1.92 
   0  -4  -2   30.30    1.80 
   0  -4  -2   30.09    1.95 
   0  -4  -2   28.71    1.81 
   0  -4   2   28.81    1.82 
   0  -4  -2   30.11    1.83 
   0  -4   2   28.50    1.87 
   0  -4   2   30.05    1.88 
   0  -4  -2   29.08    1.80 
   0  -4  -2   29.18    1.83 
   0  -4  -2   28.28    2.05 
   0  -4   2   29.17    1.82 
   0  -4  -2   27.52    1.88 
   0  -4  -2   29.18    1.81 
   0  -4  -2   29.13    1.85 
   0   4   2   27.19    1.80 
   0   4   2   27.73    1.79 
   0   4   2   28.21    1.90 
   0   4  -2   29.30    1.85 
   0   4   2   29.37    1.82 
   0   4  -2   27.30    1.79 
   0   4  -2   27.05    1.81 
   0   4  -2   27.42    1.79 
   0   4   2   27.65    1.89 
   0   4   2   28.55    1.78 
   0   4  -2   27.17    1.86 
   0   4   2   30.13    1.81 
   0   4   2   29.04    1.81 
   0   4   2   29.31    1.89 
   0   4   2   29.49    1.83 
   0   4  -2   28.13    1.94 
   0   4  -2   28.76    1.89 
   0   4  -2   26.76    1.91 
   0   4   2   28.15    1.83 
   0   4  -2   25.34    1.86 
   0   4  -2   26.51    1.82 
   0   4  -2   29.54    1.90 
   0   4  -2   31.25    1.81 
   0   4  -2   29.86    1.82 
   0   4   2   28.54    1.87 
   0   4  -2   30.09    1.97 
   0   4   2   29.25    1.80 
   1  -4   2  449.43   26.92 
  -1  -4  -2  483.35   26.99 
   1  -4   2  431.25   26.97 
   1  -4   2  466.58   27.01 
  -1  -4  -2  460.72   26.94 
  -1  -4  -2  444.05   26.97 
   1  -4   2  451.98   27.01 
   1  -4   2  487.57   26.99 
  -1  -4  -2  448.99   26.92 
   1  -4   2  438.85   26.97 
  -1  -4  -2  456.30   26.92 
  -1  -4  -2  459.38   26.93 
  -1  -4  -2  449.27   26.98 
  -1  -4  -2  429.96   26.92 
  -1  -4  -2  439.66   27.05 
  -1   4  -2  448.86   27.00 
   1   4   2  447.16   26.90 
  -1   4  -2  449.00   26.93 
  -1   4  -2  456.87   26.93 
  -1   4  -2  391.80   26.92 
  -1   4  -2  451.94   26.94 
   1   4   2  469.90   26.98 
  -1   4  -2  440.90   26.97 
   1   4   2  463.00   26.92 
  -1   4  -2  446.53   26.94 
  -1   4  -2  425.82   26.98 
   1   4   2  456.37   26.97 
   1   4   2  423.57   27.01 
   1   4   2  460.55   26.95 
  -1   4  -2  443.82   27.00 
   1   4   2  451.40   26.99 
   2  -4   2   49.99    2.95 
   2  -4   2   51.90    2.92 
   2  -4   2   50.37    2.91 
  -2   4  -2   45.33    2.94 
  -2   4  -2   43.15    2.82 
  -2   4  -2   46.34    2.94 
  -2   4  -2   44.30    3.13 
   2   4   2   40.58    3.14 
  -2   4  -2   45.90    2.91 
   2   4   2   48.94    2.87 
   2   4   2   44.86    3.06 
  -2   4  -2   46.05    2.87 
   3  -4   2   14.96    1.09 
   3   4   2   17.81    1.71 
  -3   4  -2   16.31    1.02 
  -3   4  -2   14.33    1.25 
   3   4   2   16.61    1.51 
   4  -4   2   14.70    1.21 
   4   4   2   16.20    1.73 
  -4   4  -2   16.52    1.12 
   5  -4   2   27.43    2.46 
   6  -4   2   22.50    2.13 
   6  -4   2   19.99    1.91 
   6  -4   2   21.08    1.29 
   6  -4   2   19.60    1.29 
   6   4   2   20.86    1.79 
   6   4   2   20.67    2.20 
   7  -5  -2   10.20    0.68 
   7   5  -2   10.60    1.40 
   7   5  -2    8.81    0.94 
   6  -5  -2    5.81    0.61 
   6  -5  -2    3.72    1.09 
   6  -5  -2    9.03    0.80 
   6  -5  -2    6.31    0.70 
   6  -5  -2    6.69    1.04 
   6  -5  -2    6.04    0.58 
   6  -5  -2    4.56    1.13 
   6  -5  -2    6.72    1.40 
   6   5  -2    6.61    1.44 
   6   5  -2    6.21    1.03 
   5  -5  -2   29.36    2.64 
   5  -5  -2   28.93    2.42 
   5  -5  -2   33.06    2.42 
   5   5  -2   28.21    2.68 
   5   5  -2   24.46    2.27 
   4  -5  -2    6.53    0.91 
   4  -5  -2    6.34    1.37 
  -4  -5   2    7.29    0.92 
   4  -5  -2    6.69    0.75 
   4  -5  -2    6.75    1.22 
   4   5  -2    7.42    0.59 
   4   5  -2    6.94    1.12 
   4   5  -2    6.98    1.10 
   4   5  -2    7.31    1.47 
  -4   5   2    6.88    0.86 
   4   5  -2    7.17    0.83 
   4   5  -2    6.08    0.59 
   3  -5  -2   75.68    4.64 
   3  -5  -2   72.19    4.74 
  -3  -5   2   74.23    4.52 
  -3  -5   2   82.34    4.70 
  -3  -5   2   78.20    4.61 
  -3  -5   2   68.97    4.70 
   3  -5  -2   76.65    4.74 
   3  -5  -2   67.39    4.68 
   3  -5  -2   69.20    4.58 
   3  -5  -2   69.26    4.72 
  -3   5   2   75.91    4.51 
   3   5  -2   70.29    4.61 
   3   5  -2   83.77    4.85 
   3   5  -2   69.84    4.63 
  -3   5   2   72.28    4.68 
  -3   5   2   73.67    4.69 
   3   5  -2   59.74    4.61 
   3   5  -2   73.24    4.73 
  -3   5   2   73.59    4.62 
   3   5  -2   65.81    4.62 
   2  -5  -2   67.16    4.22 
   2  -5  -2   69.73    4.13 
   2  -5  -2   64.55    3.90 
  -2  -5   2   61.99    3.95 
   2  -5  -2   68.70    3.90 
   2  -5  -2   67.56    3.91 
   2  -5  -2   66.70    3.91 
  -2  -5   2   67.27    4.06 
   2  -5  -2   68.02    4.05 
  -2  -5   2   67.70    4.06 
  -2  -5   2   61.86    3.93 
   2   5  -2   60.21    4.05 
   2   5  -2   62.47    3.87 
  -2   5   2   58.91    3.92 
  -2   5   2   65.06    4.04 
  -2   5   2   59.97    3.94 
   2   5  -2   63.76    3.87 
  -2   5   2   59.77    4.12 
   2   5  -2   59.69    4.05 
   2   5  -2   62.46    4.07 
   2   5  -2   63.77    4.13 
   2   5  -2   60.42    4.04 
  -2   5   2   62.99    4.06 
  -2   5   2   53.58    3.99 
   1  -5  -2  370.17   24.92 
  -1  -5   2  423.31   25.02 
   1  -5  -2  410.76   24.88 
   1  -5  -2  427.97   24.87 
   1  -5  -2  411.82   24.85 
   1  -5  -2  408.47   24.86 
   1  -5  -2  421.35   24.88 
  -1  -5   2  429.74   24.95 
  -1  -5   2  408.82   24.85 
   1  -5  -2  408.92   25.09 
  -1  -5   2  435.39   24.96 
   1  -5  -2  419.86   24.85 
  -1  -5   2  388.03   24.87 
   1  -5  -2  443.98   25.00 
   1  -5  -2  392.94   24.94 
   1  -5  -2  407.55   25.03 
  -1  -5   2  407.34   24.86 
   1  -5  -2  411.66   24.89 
   1  -5  -2  409.41   24.87 
  -1  -5   2  452.21   25.07 
   1  -5  -2  423.22   24.97 
  -1  -5   2  418.26   24.85 
  -1  -5   2  436.24   24.87 
   1  -5  -2  415.34   24.94 
  -1   5   2  421.60   24.85 
  -1   5   2  403.64   24.85 
  -1   5   2  424.34   24.86 
   1   5  -2  391.19   24.87 
   1   5  -2  414.46   24.84 
   1   5  -2  414.58   24.86 
  -1   5   2  416.73   24.89 
  -1   5   2  425.26   24.96 
   1   5  -2  408.99   24.87 
   1   5  -2  407.06   24.95 
  -1   5   2  418.62   24.94 
   1   5  -2  422.39   24.89 
   1   5  -2  413.09   25.03 
  -1   5   2  401.04   24.92 
   1   5  -2  395.22   24.93 
   1   5  -2  425.80   24.99 
  -1   5   2  424.33   25.01 
   1   5  -2  418.82   24.93 
   1   5  -2  393.31   24.93 
   1   5  -2  398.58   24.86 
  -1   5   2  407.28   24.87 
   1   5  -2  416.55   24.87 
   1   5  -2  420.11   24.84 
   1   5  -2  410.67   24.92 
   0  -5   2  371.77   21.92 
   0  -5  -2  351.84   22.01 
   0  -5   2  371.62   22.02 
   0  -5   2  374.61   21.99 
   0  -5   2  371.99   21.91 
   0  -5   2  365.99   21.91 
   0  -5   2  378.39   21.93 
   0  -5   2  355.97   21.91 
   0  -5   2  367.79   21.93 
   0  -5   2  357.88   21.97 
   0  -5  -2  358.04   22.09 
   0  -5  -2  360.42   21.99 
   0  -5  -2  367.18   21.99 
   0  -5  -2  365.90   21.92 
   0  -5   2  333.39   21.92 
   0  -5   2  378.85   21.91 
   0  -5   2  363.87   21.93 
   0  -5  -2  374.05   21.91 
   0  -5  -2  377.83   21.93 
   0  -5  -2  363.68   21.93 
   0  -5  -2  377.55   21.91 
   0  -5  -2  362.13   21.90 
   0  -5   2  358.44   21.98 
   0  -5   2  363.78   21.98 
   0  -5   2  333.68   22.04 
   0  -5  -2  368.35   21.92 
   0  -5   2  363.51   21.90 
   0   5  -2  366.95   21.99 
   0   5  -2  359.68   21.99 
   0   5   2  365.02   21.93 
   0   5  -2  342.00   22.06 
   0   5  -2  345.39   21.90 
   0   5   2  362.58   21.99 
   0   5   2  366.79   21.90 
   0   5   2  371.39   21.94 
   0   5  -2  361.67   21.91 
   0   5  -2  345.00   21.92 
   0   5   2  379.39   21.95 
   0   5  -2  382.99   21.98 
   0   5   2  392.79   21.93 
   0   5  -2  353.94   21.96 
   0   5  -2  352.00   21.94 
   0   5   2  374.14   21.90 
   0   5   2  367.75   21.99 
   0   5  -2  360.70   21.93 
   0   5  -2  371.13   21.91 
   0   5   2  365.84   21.95 
   0   5   2  375.53   21.97 
   0   5  -2  378.27   21.93 
   0   5  -2  362.22   21.94 
   0   5   2  365.72   21.91 
   0   5  -2  382.58   22.03 
   0   5  -2  341.27   21.94 
   0   5   2  354.95   22.04 
   0   5  -2  361.44   21.91 
   0   5   2  384.44   21.93 
   0   5   2  376.96   21.91 
  -1  -5  -2  360.70   22.19 
   1  -5   2  371.27   22.28 
   1  -5   2  366.56   22.27 
  -1  -5  -2  375.06   22.24 
   1  -5   2  354.68   22.15 
   1  -5   2  369.07   22.16 
  -1  -5  -2  382.37   22.26 
   1  -5   2  392.83   22.16 
  -1  -5  -2  366.54   22.33 
   1  -5   2  381.90   22.25 
   1  -5   2  376.65   22.24 
  -1  -5  -2  366.02   22.18 
   1  -5   2  336.03   22.15 
  -1  -5  -2  361.39   22.17 
   1  -5   2  393.15   22.16 
   1  -5   2  354.80   22.29 
  -1  -5  -2  372.61   22.24 
  -1   5  -2  363.65   22.28 
  -1   5  -2  362.85   22.18 
  -1   5  -2  361.96   22.20 
   1   5   2  346.76   22.22 
   1   5   2  374.98   22.28 
  -1   5  -2  377.88   22.20 
   1   5   2  355.97   22.16 
   1   5   2  381.52   22.21 
  -1   5  -2  373.98   22.27 
   1   5   2  381.24   22.25 
  -1   5  -2  375.18   22.23 
   1   5   2  382.57   22.22 
  -2  -5  -2   41.30    2.67 
   2  -5   2   45.69    2.77 
  -2  -5  -2   42.17    2.68 
   2  -5   2   42.84    2.77 
  -2  -5  -2   41.51    2.74 
  -2  -5  -2   44.13    2.75 
   2   5   2   42.38    3.01 
  -2   5  -2   42.90    2.71 
  -2   5  -2   44.47    2.83 
   2   5   2   45.42    2.92 
   2   5   2   46.32    2.72 
  -2   5  -2   42.63    2.66 
  -2   5  -2   42.41    3.01 
  -2   5  -2   42.93    2.80 
  -2   5  -2   46.26    2.77 
   3  -5   2   83.91    5.37 
  -3   5  -2   88.45    5.31 
  -3   5  -2   82.37    5.47 
   3   5   2   90.60    5.77 
   3   5   2   92.39    5.61 
  -4  -5  -2    7.06    0.63 
   4  -5   2    7.34    0.86 
   4   5   2    7.36    1.41 
  -4   5  -2    7.80    0.69 
   5  -5   2   32.61    2.45 
   6  -5   2    4.66    1.59 
   6  -5   2    6.06    0.47 
   6  -5   2    5.56    1.30 
   6  -5   2    5.80    0.47 
   6   5   2    5.30    1.69 
   6   5   2    7.58    1.18 
   6  -6  -2    5.49    0.70 
   6  -6  -2    3.70    1.02 
   6  -6  -2    3.90    1.41 
   6  -6  -2    5.00    0.60 
   6  -6  -2    4.87    0.96 
   6  -6  -2    6.52    0.60 
   6  -6  -2    4.79    0.51 
   6  -6  -2    3.81    1.46 
   6   6  -2    5.07    0.48 
   6   6  -2    5.45    1.32 
   6   6  -2    4.98    1.00 
   5  -6  -2   29.32    2.29 
   5  -6  -2   22.38    2.13 
   5  -6  -2   25.24    2.45 
   5   6  -2   24.76    2.11 
   5   6  -2   24.90    2.16 
   4  -6  -2   20.35    2.04 
  -4  -6   2   22.97    1.59 
   4  -6  -2   20.54    1.60 
   4  -6  -2   18.41    1.77 
   4  -6  -2   21.45    1.43 
   4   6  -2   19.23    1.61 
   4   6  -2   17.00    1.40 
   4   6  -2   20.61    2.05 
   4   6  -2   19.94    1.32 
   4   6  -2   20.53    1.49 
  -4   6   2   22.65    1.57 
   4   6  -2   20.25    1.76 
  -3  -6   2   80.45    4.76 
   3  -6  -2   67.54    4.90 
   3  -6  -2   80.74    4.98 
   3  -6  -2   75.55    4.79 
  -3  -6   2   82.42    4.83 
  -3  -6   2   78.50    5.03 
   3  -6  -2   75.55    4.97 
   3  -6  -2   70.29    4.87 
   3  -6  -2   78.68    4.81 
  -3  -6   2   85.45    4.95 
   3   6  -2   78.32    4.88 
   3   6  -2   73.19    4.87 
  -3   6   2   73.88    4.73 
   3   6  -2   79.73    4.97 
   3   6  -2   73.04    4.93 
   3   6  -2   67.69    4.87 
   3   6  -2   75.10    4.91 
  -3   6   2   78.52    4.86 
  -3   6   2   75.14    4.95 
  -3   6   2   76.44    4.92 
   3   6  -2   73.26    4.74 
   2  -6  -2  259.60   14.61 
   2  -6  -2  262.30   14.74 
   2  -6  -2  259.77   14.60 
   2  -6  -2  245.93   14.59 
  -2  -6   2  242.52   14.64 
  -2  -6   2  237.30   14.77 
  -2  -6   2  221.25   14.65 
   2  -6  -2  247.79   14.89 
  -2  -6   2  256.29   14.75 
   2  -6  -2  246.02   14.60 
   2  -6  -2  244.47   14.81 
  -2  -6   2  251.60   14.64 
  -2   6   2  241.03   14.72 
  -2   6   2  213.80   14.67 
   2   6  -2  240.37   14.72 
   2   6  -2  249.71   14.58 
   2   6  -2  237.58   14.57 
   2   6  -2  235.83   14.77 
   2   6  -2  231.80   14.72 
  -2   6   2  244.98   14.82 
   2   6  -2  233.28   14.74 
  -2   6   2  222.78   14.61 
   2   6  -2  246.10   14.79 
  -2   6   2  246.28   14.76 
   1  -6  -2  178.87   10.96 
   1  -6  -2  190.25   10.97 
  -1  -6   2  175.10   11.00 
   1  -6  -2  180.11   10.96 
  -1  -6   2  190.02   11.06 
   1  -6  -2  183.96   10.98 
   1  -6  -2  165.41   11.02 
  -1  -6   2  189.91   10.94 
   1  -6  -2  191.79   11.11 
  -1  -6   2  185.73   10.96 
   1  -6  -2  178.19   11.22 
  -1  -6   2  178.24   11.05 
   1  -6  -2  184.51   11.18 
   1  -6  -2  167.29   11.04 
   1  -6  -2  181.86   10.98 
   1  -6  -2  168.84   11.03 
   1  -6  -2  185.32   11.07 
  -1  -6   2  186.96   10.96 
   1  -6  -2  188.63   10.96 
   1  -6  -2  181.74   10.97 
   1   6  -2  182.91   10.98 
   1   6  -2  188.78   11.04 
   1   6  -2  190.07   11.16 
   1   6  -2  187.49   11.06 
   1   6  -2  171.34   11.03 
   1   6  -2  171.24   10.93 
  -1   6   2  176.29   10.99 
  -1   6   2  176.91   10.94 
  -1   6   2  182.58   11.04 
   1   6  -2  173.75   10.97 
   1   6  -2  185.76   10.97 
  -1   6   2  177.15   11.06 
   1   6  -2  178.64   10.96 
  -1   6   2  179.85   10.94 
  -1   6   2  169.50   10.96 
   1   6  -2  187.46   11.06 
  -1   6   2  177.08   11.02 
  -1   6   2  184.65   10.95 
   1   6  -2  184.77   11.03 
   1   6  -2  193.98   11.11 
  -1   6   2  193.39   11.13 
   1   6  -2  175.96   10.95 
   0  -6  -2  671.99   39.32 
   0  -6  -2  665.95   39.30 
   0  -6   2  655.25   39.30 
   0  -6   2  660.38   39.38 
   0  -6   2  695.95   39.32 
   0  -6   2  661.35   39.29 
   0  -6   2  652.97   39.31 
   0  -6   2  648.11   39.37 
   0  -6  -2  674.73   39.52 
   0  -6   2  629.71   39.32 
   0  -6  -2  646.43   39.32 
   0  -6  -2  639.20   39.47 
   0  -6   2  652.65   39.39 
   0  -6   2  656.23   39.30 
   0  -6   2  639.97   39.32 
   0  -6  -2  685.04   39.40 
   0  -6  -2  641.28   39.42 
   0  -6  -2  648.90   39.34 
   0  -6  -2  655.01   39.32 
   0  -6  -2  639.73   39.31 
   0  -6   2  616.78   39.45 
   0  -6   2  664.02   39.39 
   0  -6   2  657.99   39.32 
   0  -6   2  604.62   39.32 
   0  -6   2  687.53   39.44 
   0  -6  -2  610.92   39.29 
   0  -6  -2  678.04   39.41 
   0  -6   2  686.68   39.30 
   0  -6  -2  675.58   39.31 
   0   6   2  664.56   39.32 
   0   6  -2  664.42   39.32 
   0   6   2  679.13   39.44 
   0   6  -2  607.84   39.35 
   0   6   2  650.25   39.30 
   0   6  -2  642.64   39.34 
   0   6  -2  711.54   39.37 
   0   6  -2  666.76   39.38 
   0   6   2  624.73   39.34 
   0   6   2  668.10   39.29 
   0   6   2  678.60   39.42 
   0   6  -2  651.65   39.30 
   0   6   2  666.92   39.33 
   0   6  -2  602.31   39.34 
   0   6  -2  680.27   39.40 
   0   6  -2  624.92   39.31 
   0   6   2  592.82   39.37 
   0   6   2  644.53   39.29 
   0   6   2  635.95   39.29 
   0   6  -2  663.01   39.33 
   0   6  -2  672.30   39.30 
   0   6  -2  674.92   39.30 
   0   6   2  668.42   39.39 
   0   6  -2  686.33   39.43 
   0   6  -2  698.23   39.34 
   0   6   2  645.36   39.29 
   0   6   2  663.82   39.37 
   0   6   2  611.60   39.32 
   0   6   2  679.65   39.31 
   1  -6   2  142.13    9.01 
  -1  -6  -2  152.73    9.09 
   1  -6   2  136.87    9.10 
  -1  -6  -2  155.58    9.15 
  -1  -6  -2  149.85    9.12 
   1  -6   2  138.48    9.01 
   1  -6   2  145.23    9.03 
  -1  -6  -2  144.74    9.06 
   1  -6   2  161.55    9.03 
   1  -6   2  153.16    9.03 
   1  -6   2  147.15    9.19 
   1  -6   2  164.73    9.04 
  -1  -6  -2  149.42    9.25 
  -1  -6  -2  164.94    9.06 
   1  -6   2  153.82    9.12 
  -1  -6  -2  154.85    9.12 
   1  -6   2  148.73    9.03 
   1  -6   2  152.94    9.16 
   1  -6   2  128.29    9.01 
   1   6   2  150.13    9.10 
   1   6   2  152.45    9.08 
   1   6   2  140.10    9.22 
   1   6   2  153.23    9.10 
   1   6   2  154.04    9.12 
  -1   6  -2  141.55    9.22 
  -1   6  -2  150.89    9.04 
  -1   6  -2  151.39    9.14 
  -1   6  -2  151.12    9.07 
  -1   6  -2  157.44    9.11 
  -2  -6  -2  216.05   13.12 
  -2  -6  -2  225.26   13.09 
  -2  -6  -2  221.84   13.10 
  -2  -6  -2  215.43   13.10 
  -2  -6  -2  195.35   13.00 
   2  -6   2  221.02   13.12 
   2  -6   2  213.24   13.13 
  -2   6  -2  214.96   13.14 
   2   6   2  211.78   13.25 
   2   6   2  224.45   13.21 
  -2   6  -2  230.90   13.33 
   2   6   2  205.37   13.08 
  -2   6  -2  218.35   13.10 
  -2   6  -2  219.98   13.03 
  -2   6  -2  215.82   13.07 
   3  -6   2   76.11    4.89 
   3  -6   2   78.86    4.88 
  -3  -6  -2   76.56    4.76 
   3   6   2   83.15    5.19 
  -3   6  -2   78.22    4.80 
  -3   6  -2   77.77    4.90 
   3   6   2   86.67    5.12 
  -3   6  -2   73.57    4.93 
  -4  -6  -2   17.22    1.29 
   4  -6   2   17.33    1.62 
   4  -6   2   18.17    1.40 
   4   6   2   19.31    1.69 
  -4   6  -2   19.77    1.33 
   4   6   2   19.41    1.42 
   4   6   2   21.20    1.99 
   5  -6   2   18.71    1.21 
   5  -6   2   19.86    2.07 
   5  -6   2   19.89    1.21 
   6  -6   2    5.72    1.46 
   6  -6   2    5.02    1.26 
   6  -6   2    5.35    0.44 
   6   6   2    3.69    1.07 
   6  -7  -2    5.55    1.36 
   6  -7  -2    9.84    0.72 
   6  -7  -2    8.77    1.40 
   6  -7  -2   10.61    1.38 
   6  -7  -2    9.65    0.80 
   6  -7  -2   10.40    0.86 
   6  -7  -2    8.49    0.79 
   6  -7  -2    8.50    1.09 
   6   7  -2    9.67    1.18 
   6   7  -2    9.53    0.83 
   6   7  -2    9.26    1.64 
   6   7  -2   10.64    0.67 
   5  -7  -2   50.68    3.58 
   5  -7  -2   50.20    3.49 
   5  -7  -2   47.68    3.47 
   5   7  -2   45.26    3.40 
   5   7  -2   51.64    3.39 
  -4  -7   2   26.72    1.99 
   4  -7  -2   27.89    2.62 
   4  -7  -2   26.68    1.84 
   4  -7  -2   26.01    1.99 
   4  -7  -2   23.27    2.29 
   4  -7  -2   30.93    2.31 
   4  -7  -2   23.96    2.18 
  -4   7   2   29.78    1.95 
   4   7  -2   26.64    1.86 
   4   7  -2   28.20    2.06 
   4   7  -2   28.44    1.74 
   4   7  -2   28.45    2.17 
   4   7  -2   25.50    2.38 
   3  -7  -2    9.60    1.20 
  -3  -7   2    9.14    0.94 
   3  -7  -2    7.39    1.14 
  -3  -7   2    9.40    1.06 
   3  -7  -2    8.63    1.21 
  -3  -7   2    8.53    1.01 
   3  -7  -2    7.86    1.04 
  -3  -7   2   11.58    1.68 
   3   7  -2    8.96    1.07 
  -3   7   2    9.02    0.89 
   3   7  -2    9.22    0.98 
  -3   7   2    8.54    1.10 
   3   7  -2    9.04    0.90 
   3   7  -2    9.12    1.08 
   3   7  -2    9.34    1.19 
  -3   7   2    8.43    1.07 
   3   7  -2   10.19    1.23 
  -2  -7   2   19.69    1.60 
   2  -7  -2   21.78    1.44 
   2  -7  -2   21.61    1.72 
   2  -7  -2   21.28    1.44 
   2  -7  -2   21.14    1.83 
  -2  -7   2   21.06    1.49 
  -2  -7   2   21.11    1.64 
  -2  -7   2   20.32    1.47 
  -2  -7   2   20.70    1.53 
   2  -7  -2   21.35    1.42 
   2  -7  -2   21.76    1.45 
   2   7  -2   20.71    1.68 
   2   7  -2   20.07    1.65 
   2   7  -2   16.85    1.47 
   2   7  -2   22.40    1.40 
   2   7  -2   21.88    1.66 
  -2   7   2   18.04    1.58 
  -2   7   2   20.88    1.74 
  -2   7   2   22.03    1.62 
  -2   7   2   20.26    1.45 
   2   7  -2   20.41    1.63 
  -2   7   2   22.24    1.67 
   2   7  -2   21.76    1.79 
   1  -7  -2  191.47   11.24 
   1  -7  -2  171.84   11.12 
  -1  -7   2  181.36   11.05 
   1  -7  -2  187.76   10.99 
   1  -7  -2  172.82   10.98 
  -1  -7   2  183.30   10.95 
   1  -7  -2  174.87   10.98 
  -1  -7   2  182.93   10.97 
  -1  -7   2  181.89   11.07 
   1  -7  -2  177.52   11.25 
   1  -7  -2  184.14   11.10 
   1  -7  -2  178.09   11.07 
  -1  -7   2  182.46   10.96 
   1  -7  -2  181.37   10.97 
   1  -7  -2  163.79   10.95 
   1  -7  -2  178.75   10.97 
   1   7  -2  175.86   11.05 
   1   7  -2  187.15   11.05 
  -1   7   2  174.73   11.00 
   1   7  -2  181.30   10.94 
   1   7  -2  186.01   10.99 
   1   7  -2  198.43   11.15 
   1   7  -2  183.59   10.99 
  -1   7   2  185.56   11.14 
  -1   7   2  164.76   10.95 
  -1   7   2  185.17   11.09 
  -1   7   2  190.22   11.04 
  -1   7   2  183.67   10.95 
   1   7  -2  174.94   11.06 
   1   7  -2  177.02   10.99 
  -1   7   2  180.06   11.06 
   1   7  -2  186.56   11.18 
   1   7  -2  186.47   10.96 
   1   7  -2  191.78   10.97 
   0  -7   2   53.58    3.34 
   0  -7   2   52.36    3.27 
   0  -7  -2   49.75    3.21 
   0  -7   2   50.37    3.16 
   0  -7  -2   50.20    3.49 
   0  -7   2   54.11    3.20 
   0  -7  -2   48.93    3.34 
   0  -7   2   55.55    3.17 
   0  -7   2   49.99    3.30 
   0  -7  -2   53.72    3.33 
   0  -7   2   52.73    3.18 
   0  -7  -2   45.92    3.17 
   0  -7  -2   52.18    3.18 
   0  -7   2   47.41    3.16 
   0  -7   2   52.51    3.21 
   0  -7   2   49.15    3.27 
   0  -7   2   51.08    3.21 
   0  -7  -2   53.21    3.22 
   0  -7   2   51.97    3.19 
   0  -7   2   52.18    3.42 
   0  -7   2   51.07    3.30 
   0  -7  -2   52.39    3.20 
   0  -7  -2   51.88    3.51 
   0  -7  -2   51.55    3.34 
   0  -7   2   48.25    3.19 
   0   7   2   54.17    3.23 
   0   7  -2   48.75    3.25 
   0   7  -2   52.13    3.17 
   0   7  -2   51.67    3.32 
   0   7   2   47.22    3.16 
   0   7   2   51.33    3.20 
   0   7  -2   49.50    3.24 
   0   7   2   49.85    3.27 
   0   7   2   52.78    3.21 
   0   7   2   50.54    3.29 
   0   7  -2   52.37    3.36 
   0   7   2   54.67    3.37 
   0   7  -2   53.23    3.30 
   0   7   2   53.53    3.21 
   0   7   2   46.16    3.21 
   0   7  -2   49.75    3.35 
   0   7  -2   51.35    3.17 
   0   7   2   51.70    3.31 
   0   7  -2   53.06    3.29 
   0   7  -2   49.76    3.17 
   0   7   2   55.36    3.25 
   0   7   2   52.27    3.28 
   0   7   2   50.25    3.16 
   0   7  -2   53.08    3.20 
   1  -7   2  185.62   10.46 
  -1  -7  -2  176.80   10.69 
   1  -7   2  178.80   10.55 
   1  -7   2  164.28   10.43 
   1  -7   2  178.79   10.45 
   1  -7   2  178.34   10.44 
  -1  -7  -2  176.51   10.55 
   1  -7   2  174.23   10.63 
  -1  -7  -2  161.56   10.47 
   1  -7   2  168.79   10.42 
  -1  -7  -2  176.23   10.60 
   1  -7   2  183.11   10.45 
  -1  -7  -2  173.20   10.54 
   1  -7   2  182.32   10.59 
   1   7   2  166.25   10.53 
  -1   7  -2  171.14   10.52 
  -1   7  -2  171.47   10.56 
   1   7   2  169.51   10.50 
   1   7   2  166.36   10.40 
   1   7   2  168.09   10.57 
  -1   7  -2  170.72   10.66 
  -1   7  -2  175.72   10.48 
   1   7   2  166.03   10.51 
   2  -7   2   30.98    1.99 
  -2  -7  -2   29.66    2.00 
   2  -7   2   29.71    2.01 
  -2  -7  -2   28.76    2.01 
  -2  -7  -2   30.15    2.04 
  -2  -7  -2   26.79    1.86 
   2   7   2   31.67    2.26 
  -2   7  -2   28.63    1.96 
   2   7   2   29.60    1.97 
  -2   7  -2   30.12    2.28 
   2   7   2   29.82    2.16 
  -2   7  -2   27.04    2.00 
  -2   7  -2   30.43    2.06 
  -2   7  -2   30.07    1.99 
  -2   7  -2   27.16    1.88 
   2   7   2   29.73    2.01 
   3  -7   2    6.16    0.67 
   3  -7   2    5.09    0.78 
  -3  -7  -2    6.75    0.62 
   3  -7   2    5.61    0.48 
  -3  -7  -2    5.46    0.71 
   3   7   2    5.77    1.30 
   3   7   2    5.56    1.15 
  -3   7  -2    4.47    0.76 
  -3   7  -2    6.18    0.60 
  -3   7  -2    5.92    0.80 
   4  -7   2   28.91    2.14 
  -4  -7  -2   33.36    2.07 
   4  -7   2   33.03    2.30 
   4   7   2   29.50    2.60 
  -4   7  -2   30.33    2.11 
   4   7   2   31.24    2.10 
   4   7   2   34.86    2.34 
   5  -7   2   48.50    2.86 
   5  -7   2   48.57    2.86 
   5  -7   2   47.08    2.98 
   5  -7   2   53.11    3.47 
   5   7   2   43.05    3.41 
   5   7   2   39.36    3.43 
   6  -7   2    6.22    0.53 
   6  -7   2    5.65    1.23 
   6  -7   2    9.39    1.56 
   6  -8  -2   16.33    1.14 
   6  -8  -2   16.16    1.00 
   6  -8  -2   12.26    1.27 
   6  -8  -2   14.62    1.64 
   6  -8  -2   13.93    1.45 
   6  -8  -2   12.97    1.05 
   6  -8  -2   14.70    1.07 
   6   8  -2   14.14    1.80 
   6   8  -2   14.80    1.06 
   6   8  -2   15.77    1.40 
   5  -8  -2   16.41    1.63 
   5  -8  -2   16.38    1.21 
   5  -8  -2   16.10    1.44 
   5  -8  -2   15.97    1.17 
   5  -8  -2   12.39    1.65 
   5  -8  -2   18.19    1.90 
   5   8  -2   11.19    1.54 
   5   8  -2   14.80    1.57 
   5   8  -2   14.17    1.34 
   5   8  -2   14.13    1.15 
   5   8  -2   14.08    1.16 
   4  -8  -2   60.30    3.98 
  -4  -8   2   59.15    3.86 
   4  -8  -2   59.76    3.73 
   4  -8  -2   54.71    4.04 
   4  -8  -2   61.39    3.94 
   4  -8  -2   59.16    3.85 
   4   8  -2   61.21    3.75 
   4   8  -2   59.84    3.64 
   4   8  -2   55.15    3.96 
  -4   8   2   56.54    3.83 
   4   8  -2   64.89    3.92 
   3  -8  -2   11.15    1.37 
   3  -8  -2   11.43    1.19 
   3  -8  -2   11.04    1.39 
  -3  -8   2   12.02    1.11 
  -3  -8   2   12.28    1.29 
   3  -8  -2   12.75    1.19 
  -3  -8   2   10.37    1.17 
   3  -8  -2   11.02    1.31 
   3   8  -2    8.59    1.17 
  -3   8   2   12.05    1.02 
   3   8  -2   12.32    1.27 
  -3   8   2   10.83    1.18 
   3   8  -2   11.91    1.32 
   3   8  -2   10.45    1.11 
   3   8  -2   11.12    1.02 
   3   8  -2   13.46    1.48 
  -3   8   2   13.64    1.29 
   2  -8  -2   35.21    2.16 
   2  -8  -2   35.09    2.16 
  -2  -8   2   33.64    2.21 
   2  -8  -2   35.50    2.15 
   2  -8  -2   34.60    2.16 
   2  -8  -2   33.83    2.52 
  -2  -8   2   35.85    2.33 
   2  -8  -2   30.24    2.28 
  -2  -8   2   37.62    2.38 
  -2  -8   2   33.84    2.28 
   2  -8  -2   35.39    2.44 
   2   8  -2   31.46    2.33 
   2   8  -2   30.12    2.35 
   2   8  -2   31.32    2.07 
   2   8  -2   31.71    2.07 
   2   8  -2   32.00    2.38 
   2   8  -2   30.33    2.29 
  -2   8   2   33.87    2.46 
   2   8  -2   29.08    2.21 
  -2   8   2   29.78    2.28 
   2   8  -2   31.47    2.44 
   2   8  -2   34.12    2.12 
  -2   8   2   32.43    2.32 
  -2   8   2   34.57    2.38 
   1  -8  -2   69.07    4.35 
   1  -8  -2   65.53    4.36 
   1  -8  -2   64.52    4.34 
   1  -8  -2   75.84    4.37 
   1  -8  -2   67.70    4.62 
   1  -8  -2   69.69    4.52 
   1  -8  -2   67.83    4.36 
  -1  -8   2   66.12    4.45 
   1  -8  -2   66.73    4.69 
  -1  -8   2   67.85    4.44 
   1  -8  -2   68.42    4.49 
   1  -8  -2   65.78    4.49 
   1   8  -2   71.36    4.36 
   1   8  -2   77.87    4.44 
   1   8  -2   69.38    4.42 
  -1   8   2   69.30    4.44 
  -1   8   2   64.84    4.32 
   1   8  -2   73.09    4.60 
  -1   8   2   75.64    4.56 
   1   8  -2   69.67    4.33 
  -1   8   2   66.99    4.30 
   1   8  -2   76.92    4.55 
   1   8  -2   74.66    4.37 
  -1   8   2   66.73    4.38 
  -1   8   2   71.38    4.47 
  -1   8   2   71.74    4.41 
   1   8  -2   71.93    4.33 
   1   8  -2   73.32    4.37 
   0  -8  -2   53.16    3.34 
   0  -8  -2   52.27    3.55 
   0  -8  -2   52.70    3.23 
   0  -8   2   51.10    3.21 
   0  -8   2   53.32    3.19 
   0  -8   2   49.64    3.44 
   0  -8   2   51.20    3.16 
   0  -8  -2   49.81    3.19 
   0  -8   2   52.38    3.20 
   0  -8  -2   48.88    3.17 
   0  -8   2   53.52    3.22 
   0  -8   2   51.65    3.35 
   0  -8   2   50.77    3.31 
   0  -8   2   50.37    3.20 
   0  -8   2   50.92    3.32 
   0  -8   2   51.83    3.18 
   0  -8  -2   48.35    3.21 
   0  -8  -2   50.33    3.35 
   0   8  -2   51.89    3.29 
   0   8   2   48.57    3.22 
   0   8   2   50.91    3.23 
   0   8  -2   51.33    3.32 
   0   8  -2   52.28    3.39 
   0   8   2   47.55    3.25 
   0   8  -2   49.44    3.25 
   0   8  -2   50.58    3.17 
   0   8   2   51.63    3.21 
   0   8  -2   49.63    3.17 
   0   8   2   53.57    3.38 
   0   8  -2   49.58    3.24 
   0   8  -2   53.38    3.17 
   0   8   2   53.22    3.36 
   0   8   2   51.27    3.30 
   0   8  -2   52.29    3.37 
   0   8   2   52.61    3.20 
   0   8   2   53.98    3.21 
   0   8   2   46.77    3.16 
   0   8   2   49.88    3.30 
   0   8  -2   50.71    3.29 
  -1  -8  -2   40.61    2.58 
   1  -8   2   40.48    2.53 
   1  -8   2   39.97    2.80 
   1  -8   2   39.75    2.54 
   1  -8   2   45.34    2.56 
  -1  -8  -2   39.83    2.58 
  -1  -8  -2   42.57    2.93 
   1  -8   2   36.61    2.50 
  -1  -8  -2   41.95    2.69 
  -1  -8  -2   40.92    2.69 
  -1  -8  -2   41.45    2.75 
   1  -8   2   41.69    2.71 
   1  -8   2   43.40    2.57 
   1  -8   2   41.31    2.65 
  -1   8  -2   35.70    2.57 
   1   8   2   41.60    2.49 
   1   8   2   44.51    2.68 
  -1   8  -2   38.29    2.65 
  -1   8  -2   36.76    2.80 
   1   8   2   38.51    2.69 
   1   8   2   43.64    2.50 
   1   8   2   34.00    2.61 
  -1   8  -2   39.11    2.70 
   2  -8   2   18.23    1.56 
  -2  -8  -2   20.85    1.66 
   2  -8   2   19.69    1.58 
  -2  -8  -2   20.34    1.60 
  -2  -8  -2   20.38    1.47 
   2  -8   2   20.33    1.55 
  -2  -8  -2   19.20    1.58 
   2   8   2   23.04    1.49 
  -2   8  -2   22.27    1.65 
   2   8   2   23.47    1.76 
   2   8   2   24.62    1.88 
   2   8   2   21.89    1.61 
  -2   8  -2   21.78    1.88 
  -2   8  -2   20.50    1.61 
   2   8   2   21.32    1.58 
  -2   8  -2   23.29    1.45 
  -2   8  -2   24.40    1.59 
   3  -8   2    7.12    0.85 
   3  -8   2    6.50    0.78 
   3  -8   2    6.71    0.59 
  -3  -8  -2    7.55    0.96 
  -3  -8  -2    7.65    0.74 
   3  -8   2    6.32    0.76 
  -3   8  -2    5.27    0.85 
   3   8   2    6.90    1.21 
   3   8   2    5.05    0.86 
  -3   8  -2    7.06    0.70 
   3   8   2    6.48    1.43 
  -3   8  -2    4.66    1.48 
  -4  -8  -2   53.84    3.41 
   4  -8   2   54.31    3.47 
   4  -8   2   53.84    3.60 
   4   8   2   50.93    3.41 
  -4   8  -2   58.54    3.44 
   4   8   2   52.26    3.58 
   4   8   2   52.43    3.89 
   5  -8   2   13.61    1.06 
   5  -8   2   12.58    1.03 
   5  -8   2   11.24    0.94 
   5  -8   2   12.89    0.90 
   5  -8   2   13.26    1.15 
   5  -8   2   17.19    1.86 
   5  -8   2   13.78    1.48 
   5   8   2   15.62    1.52 
   5   8   2   13.80    1.25 
   5   8   2   16.04    1.59 
   5   8   2   13.30    0.90 
   5   8   2   14.08    0.93 
   6  -8   2    5.66    1.64 
   6  -8   2   10.63    0.69 
   6  -8   2   10.06    1.28 
   6   8   2   10.08    1.17 
   6  -9  -2    1.85    0.55 
   6  -9  -2    1.45    0.65 
   6  -9  -2    2.12    0.56 
   6  -9  -2    1.54    0.48 
   6  -9  -2    1.64    0.85 
   6  -9  -2    1.06    0.83 
   6  -9  -2    1.11    0.77 
   6  -9  -2    1.45    0.39 
   6   9  -2    1.35    0.81 
   6   9  -2    1.88    0.53 
   5  -9  -2    7.34    1.49 
   5  -9  -2    9.98    0.95 
   5  -9  -2   10.98    1.63 
   5  -9  -2   10.04    1.45 
   5  -9  -2   10.76    1.40 
   5  -9  -2    9.71    0.93 
   5   9  -2   10.89    1.33 
   5   9  -2   10.23    0.88 
   5   9  -2   10.72    0.95 
   5   9  -2   10.32    0.95 
   5   9  -2   10.36    0.90 
   5   9  -2   11.23    1.15 
   5   9  -2   11.61    1.40 
   4  -9  -2   23.00    1.72 
   4  -9  -2   26.59    2.14 
  -4  -9   2   22.73    1.88 
   4  -9  -2   23.38    1.92 
   4  -9  -2   24.45    2.00 
   4  -9  -2   23.54    2.08 
   4   9  -2   23.88    2.25 
  -4   9   2   24.61    2.06 
   4   9  -2   24.60    1.62 
   4   9  -2   25.54    1.80 
   4   9  -2   24.76    1.95 
   4   9  -2   27.22    2.08 
  -3  -9   2   35.51    2.75 
   3  -9  -2   42.24    2.72 
   3  -9  -2   39.15    2.88 
  -3  -9   2   41.38    2.64 
   3  -9  -2   39.39    2.72 
   3  -9  -2   39.57    2.74 
  -3  -9   2   36.31    2.82 
   3   9  -2   35.21    2.63 
   3   9  -2   40.78    2.83 
   3   9  -2   40.22    2.78 
   3   9  -2   47.04    2.99 
   3   9  -2   36.04    2.59 
  -3   9   2   39.61    2.82 
   3   9  -2   36.30    2.53 
  -3   9   2   39.46    2.71 
   3   9  -2   37.08    2.61 
   3   9  -2   38.80    2.66 
   2  -9  -2   46.34    3.08 
   2  -9  -2   38.25    2.86 
   2  -9  -2   37.55    2.70 
  -2  -9   2   40.34    2.72 
   2  -9  -2   40.78    2.61 
  -2  -9   2   42.78    2.68 
   2  -9  -2   43.52    2.62 
   2  -9  -2   41.30    2.63 
   2  -9  -2   37.62    2.48 
  -2  -9   2   42.48    2.81 
   2  -9  -2   38.99    2.72 
  -2  -9   2   39.95    2.81 
  -2   9   2   40.03    2.74 
   2   9  -2   39.07    2.54 
   2   9  -2   40.96    2.53 
   2   9  -2   37.72    2.85 
  -2   9   2   42.97    2.78 
  -2   9   2   41.19    2.84 
   2   9  -2   38.38    2.70 
  -2   9   2   39.00    2.92 
   2   9  -2   42.83    2.97 
   2   9  -2   40.20    2.68 
   2   9  -2   42.58    2.86 
   1  -9  -2   13.21    1.30 
   1  -9  -2   13.58    1.13 
   1  -9  -2   13.44    1.48 
   1  -9  -2   12.07    1.62 
  -1  -9   2   13.38    1.23 
   1  -9  -2   14.25    1.08 
  -1  -9   2   13.56    1.23 
   1  -9  -2   13.92    1.13 
   1  -9  -2   14.70    1.35 
   1  -9  -2   13.79    1.13 
  -1  -9   2   13.92    1.18 
   1   9  -2   15.04    1.09 
  -1   9   2   11.45    1.22 
   1   9  -2   13.46    1.34 
  -1   9   2   12.12    1.18 
   1   9  -2   14.09    1.13 
   1   9  -2   14.24    1.49 
  -1   9   2   14.30    1.22 
   1   9  -2   12.68    1.21 
   1   9  -2   12.28    1.11 
   1   9  -2   13.32    1.12 
   1   9  -2   13.14    1.08 
  -1   9   2   11.06    1.07 
  -1   9   2   13.40    1.36 
   0  -9  -2    2.50    0.64 
   0  -9   2    3.10    0.60 
   0  -9   2    2.14    0.49 
   0  -9  -2    2.97    0.87 
   0  -9   2    3.48    0.55 
   0  -9  -2    2.68    1.16 
   0  -9   2    3.35    0.76 
   0  -9  -2    2.22    0.52 
   0  -9   2    2.84    0.54 
   0  -9   2    2.70    0.75 
   0  -9   2    3.06    1.02 
   0  -9   2    3.21    0.52 
   0  -9  -2    2.51    0.85 
   0  -9  -2    2.77    0.52 
   0  -9   2    3.47    0.74 
   0   9   2    2.33    0.59 
   0   9   2    2.76    0.65 
   0   9  -2    3.04    0.72 
   0   9   2    2.77    0.64 
   0   9  -2    2.68    0.45 
   0   9  -2    3.32    0.78 
   0   9  -2    2.45    0.64 
   0   9   2    3.39    0.85 
   0   9  -2    3.31    0.48 
   0   9  -2    2.47    0.75 
   0   9   2    2.39    0.57 
   0   9  -2    3.11    0.85 
   0   9   2    2.08    0.47 
   0   9   2    3.13    0.64 
   0   9   2    2.19    0.67 
   0   9  -2    2.17    0.72 
   0   9  -2    2.90    0.95 
   0   9   2    3.28    0.72 
   1  -9   2   18.00    1.38 
  -1  -9  -2   19.37    1.46 
   1  -9   2   21.66    1.38 
   1  -9   2   20.45    1.40 
  -1  -9  -2   21.30    1.89 
   1  -9   2   21.23    1.58 
   1  -9   2   19.52    1.50 
   1  -9   2   19.89    1.42 
   1  -9   2   20.82    1.31 
  -1  -9  -2   18.77    1.43 
   1  -9   2   20.93    1.73 
  -1  -9  -2   20.43    1.59 
  -1  -9  -2   19.83    1.58 
   1   9   2   22.29    1.58 
   1   9   2   19.61    1.51 
  -1   9  -2   20.45    1.47 
  -1   9  -2   21.89    1.75 
   1   9   2   19.47    1.35 
   1   9   2   22.30    1.79 
  -1   9  -2   19.97    1.55 
   1   9   2   17.10    1.29 
  -1   9  -2   21.54    1.59 
   1   9   2   19.70    1.30 
   1   9   2   19.25    1.33 
   1   9   2   21.23    1.34 
   1   9   2   16.79    1.33 
  -1   9  -2   21.91    1.63 
   2  -9   2   54.81    3.67 
  -2  -9  -2   58.36    3.63 
   2  -9   2   55.86    3.72 
  -2  -9  -2   53.34    3.80 
  -2  -9  -2   58.57    3.75 
  -2  -9  -2   59.67    3.74 
   2  -9   2   61.20    3.78 
  -2  -9  -2   54.99    3.68 
   2  -9   2   62.84    3.82 
   2   9   2   57.89    3.65 
  -2   9  -2   57.18    3.73 
   2   9   2   57.70    3.81 
  -2   9  -2   59.31    3.79 
   2   9   2   59.52    3.92 
   2   9   2   59.96    3.68 
   2   9   2   58.52    3.69 
   2   9   2   56.44    3.69 
   2   9   2   56.87    3.75 
  -2   9  -2   57.42    3.73 
  -2   9  -2   54.71    3.61 
   2   9   2   60.54    3.77 
  -2   9  -2   58.91    4.00 
   3  -9   2   27.46    2.07 
   3  -9   2   24.22    1.78 
  -3  -9  -2   24.59    1.91 
  -3  -9  -2   27.29    1.74 
   3  -9   2   24.51    1.62 
   3  -9   2   23.73    1.72 
  -3   9  -2   26.07    1.71 
   3   9   2   23.07    1.82 
   3   9   2   26.67    2.23 
   3   9   2   26.34    2.30 
   3   9   2   22.01    1.81 
  -3   9  -2   22.41    2.21 
  -4  -9  -2   15.84    1.28 
   4  -9   2   16.02    1.56 
   4  -9   2   17.80    1.44 
   4   9   2   13.97    2.14 
   4   9   2   17.83    1.58 
  -4   9  -2   17.74    1.29 
   4   9   2   15.20    1.86 
   4   9   2   14.64    1.37 
   5  -9   2    9.85    0.96 
   5  -9   2   11.54    1.26 
   5  -9   2   10.11    1.43 
   5  -9   2    8.88    1.53 
   5  -9   2   12.61    1.09 
   5  -9   2   11.77    0.96 
   5  -9   2   11.45    0.78 
   5   9   2   10.42    1.37 
   5   9   2   11.61    0.79 
   5   9   2   11.66    1.51 
   5   9   2   11.64    1.54 
   5   9   2   10.69    0.81 
   5   9   2   12.17    1.20 
   6  -9   2    2.95    1.38 
   6  -9   2    2.63    0.35 
   6  -9   2    1.53    0.74 
   6   9   2    1.14    0.67 
   6 -10  -2    9.94    0.76 
   6 -10  -2    9.56    1.51 
   6 -10  -2    9.76    0.82 
   6 -10  -2    8.75    0.86 
   6 -10  -2    8.15    0.73 
   6  10  -2   10.74    0.81 
   6  10  -2   12.46    1.20 
   5 -10  -2   17.97    1.33 
   5 -10  -2   14.96    1.35 
   5 -10  -2   17.64    1.67 
   5 -10  -2   18.61    1.61 
   5 -10  -2   22.33    2.01 
   5 -10  -2   20.70    2.12 
   5  10  -2   17.03    1.30 
   5  10  -2   18.09    1.78 
   5  10  -2   19.20    1.49 
   5  10  -2   16.91    1.36 
   5  10  -2   18.88    1.71 
   5  10  -2   16.56    1.30 
   5  10  -2   19.53    1.35 
   4 -10  -2   21.46    1.93 
   4 -10  -2   19.81    1.88 
  -4 -10   2   21.16    1.75 
   4 -10  -2   21.92    1.57 
   4 -10  -2   20.23    1.76 
   4 -10  -2   20.46    1.86 
  -4  10   2   22.17    1.86 
   4  10  -2   20.04    1.82 
   4  10  -2   21.68    1.67 
   4  10  -2   20.82    1.94 
   4  10  -2   22.06    1.48 
   4  10  -2   24.66    2.74 
   4  10  -2   20.42    1.66 
  -3 -10   2    4.87    1.03 
   3 -10  -2    7.50    1.13 
   3 -10  -2    9.23    1.27 
   3 -10  -2    6.51    1.18 
   3 -10  -2    7.92    1.02 
   3 -10  -2    6.02    1.32 
  -3 -10   2    7.40    1.06 
  -3 -10   2    8.38    0.99 
   3 -10  -2    6.02    1.20 
   3  10  -2    7.64    1.01 
   3  10  -2    5.96    1.14 
   3  10  -2    6.66    1.03 
   3  10  -2    7.50    1.15 
  -3  10   2    6.00    1.09 
  -3  10   2    6.47    1.11 
   3  10  -2    7.65    1.08 
   3  10  -2    6.83    1.08 
   3  10  -2    6.19    1.13 
   3  10  -2    7.88    0.87 
   2 -10  -2   16.80    1.74 
   2 -10  -2   20.96    1.43 
  -2 -10   2   19.47    1.64 
  -2 -10   2   18.99    1.55 
   2 -10  -2   18.49    1.23 
   2 -10  -2   18.82    1.59 
   2 -10  -2   18.72    1.40 
   2 -10  -2   15.11    1.64 
   2 -10  -2   18.35    1.90 
   2 -10  -2   16.91    1.69 
  -2 -10   2   21.18    1.67 
   2 -10  -2   20.28    1.43 
  -2 -10   2   18.34    1.49 
   2  10  -2   19.29    1.56 
   2  10  -2   19.69    1.31 
   2  10  -2   19.96    1.83 
  -2  10   2   18.59    1.77 
   2  10  -2   20.20    1.31 
   2  10  -2   18.21    1.68 
   2  10  -2   21.01    1.65 
   2  10  -2   20.02    1.70 
  -2  10   2   19.91    1.67 
   2  10  -2   18.37    1.54 
  -2  10   2   18.88    1.58 
  -2  10   2   21.19    1.60 
   1 -10  -2  166.87   10.34 
   1 -10  -2  174.03   10.24 
   1 -10  -2  172.71   10.06 
  -1 -10   2  182.21   10.22 
   1 -10  -2  181.55   10.06 
  -1 -10   2  167.83   10.18 
   1 -10  -2  174.72   10.05 
  -1 -10   2  166.47   10.09 
   1 -10  -2  164.19   10.42 
   1 -10  -2  168.78   10.07 
   1  10  -2  157.43   10.05 
   1  10  -2  161.69   10.06 
  -1  10   2  168.37   10.26 
   1  10  -2  157.35   10.30 
  -1  10   2  153.20   10.07 
   1  10  -2  163.62   10.25 
   1  10  -2  164.41   10.05 
   1  10  -2  164.97   10.13 
   1  10  -2  160.09   10.02 
  -1  10   2  151.49   10.08 
  -1  10   2  161.97   10.12 
  -1  10   2  167.88   10.19 
  -1  10   2  147.36   10.08 
   1  10  -2  161.35   10.03 
   0 -10   2   66.89    4.34 
   0 -10  -2   69.95    4.48 
   0 -10   2   72.34    4.35 
   0 -10   2   68.25    4.51 
   0 -10   2   67.18    4.46 
   0 -10  -2   72.29    4.75 
   0 -10   2   71.04    4.34 
   0 -10  -2   63.47    4.34 
   0 -10  -2   71.42    4.51 
   0 -10   2   69.61    4.62 
   0  10  -2   64.37    4.46 
   0  10  -2   70.91    4.53 
   0  10  -2   71.96    4.46 
   0  10   2   72.67    4.33 
   0  10   2   71.17    4.35 
   0  10  -2   63.72    4.30 
   0  10  -2   71.19    4.50 
   0  10   2   73.14    4.55 
   0  10  -2   68.77    4.39 
   0  10  -2   71.36    4.38 
   0  10   2   70.34    4.36 
   0  10   2   71.89    4.37 
   0  10   2   68.22    4.35 
   1 -10   2  177.20   11.25 
   1 -10   2  164.80   11.06 
   1 -10   2  167.70   11.07 
  -1 -10  -2  173.57   11.12 
   1 -10   2  186.12   11.08 
   1 -10   2  190.42   11.34 
  -1 -10  -2  193.89   11.22 
  -1 -10  -2  187.14   11.41 
  -1 -10  -2  183.05   11.22 
   1 -10   2  172.53   11.10 
  -1 -10  -2  172.34   11.11 
  -1 -10  -2  170.27   11.14 
   1  10   2  193.16   11.04 
  -1  10  -2  182.67   11.17 
   1  10   2  185.62   11.04 
  -1  10  -2  202.07   11.27 
   1  10   2  184.78   11.04 
  -1  10  -2  194.51   11.19 
  -1  10  -2  197.55   11.37 
   2 -10   2   24.42    1.74 
   2 -10   2   24.62    1.80 
   2 -10   2   22.80    1.75 
  -2 -10  -2   22.99    1.73 
  -2 -10  -2   25.07    1.82 
  -2 -10  -2   24.99    1.68 
   2 -10   2   23.79    1.80 
  -2 -10  -2   19.14    1.89 
  -2 -10  -2   23.53    1.79 
   2 -10   2   25.80    1.92 
   2 -10   2   22.83    1.73 
   2  10   2   22.23    1.73 
  -2  10  -2   24.72    2.11 
   2  10   2   22.95    1.79 
   2  10   2   23.97    2.02 
  -2  10  -2   24.00    1.80 
   2  10   2   22.09    1.73 
  -2  10  -2   22.79    1.61 
   2  10   2   22.48    1.90 
  -2  10  -2   23.86    1.84 
   2  10   2   22.85    1.77 
   2  10   2   23.01    1.80 
   2  10   2   24.89    1.70 
  -2  10  -2   23.36    1.79 
   3 -10   2    6.65    1.00 
  -3 -10  -2    4.01    0.98 
  -3 -10  -2    7.37    0.84 
   3 -10   2    6.56    0.65 
   3 -10   2    4.76    0.82 
   3 -10   2    6.81    0.91 
  -3  10  -2    7.44    0.75 
   3  10   2    6.38    1.25 
   3  10   2    5.44    1.47 
   3  10   2    6.60    1.01 
   3  10   2    4.55    1.07 
  -3  10  -2    5.64    0.96 
  -3  10  -2    6.95    1.39 
   3  10   2    6.78    1.02 
   4 -10   2   22.96    1.79 
   4 -10   2   22.43    1.87 
  -4 -10  -2   21.70    1.63 
   4  10   2   21.40    1.41 
   4  10   2   23.70    1.90 
   4  10   2   22.73    2.53 
  -4  10  -2   22.92    1.64 
   4  10   2   19.48    2.31 
   4  10   2   21.74    1.72 
   5 -10   2   13.53    1.16 
   5 -10   2   14.79    1.29 
   5 -10   2   14.63    1.58 
   5 -10   2   15.17    1.54 
   5 -10   2   16.32    1.78 
   5 -10   2   13.91    1.15 
   5 -10   2   15.46    1.01 
   5  10   2   14.71    0.99 
   5  10   2   15.91    1.04 
   5  10   2   14.04    1.77 
   5  10   2   15.84    1.77 
   5  10   2   15.02    1.33 
   5  10   2   14.92    1.36 
   6 -10   2   13.74    1.39 
   6 -10   2   11.92    1.63 
   6 -10   2   14.25    0.95 
   6  10   2   16.70    1.38 
   6  10   2   14.82    0.90 
   6  10   2   13.70    0.89 
   6 -11  -2    0.15    0.28 
   6 -11  -2    0.04    0.65 
   6 -11  -2    0.75    0.41 
   6 -11  -2    0.62    0.40 
   6 -11  -2   -0.03    0.81 
   6 -11  -2    0.37    0.30 
   6  11  -2    0.39    0.27 
   6  11  -2    0.65    0.47 
   6  11  -2    0.59    0.76 
   5 -11  -2    3.19    0.99 
   5 -11  -2    2.64    0.90 
   5 -11  -2    3.81    0.74 
   5 -11  -2    3.64    0.67 
   5 -11  -2    1.81    1.07 
   5 -11  -2    0.87    0.98 
   5  11  -2    3.08    0.74 
   5  11  -2    2.93    0.68 
   5  11  -2    3.26    0.68 
   5  11  -2    2.37    0.68 
   5  11  -2    1.91    0.96 
   5  11  -2    5.02    1.19 
   4 -11  -2    5.31    1.38 
   4 -11  -2    2.97    0.77 
   4 -11  -2    2.95    1.08 
   4 -11  -2    4.11    1.20 
  -4 -11   2    2.70    0.96 
   4 -11  -2    2.74    0.89 
   4  11  -2    4.03    0.92 
   4  11  -2    2.72    1.00 
   4  11  -2    3.94    1.16 
  -4  11   2    1.37    0.84 
   4  11  -2    3.09    0.90 
   4  11  -2    2.50    0.71 
   3 -11  -2    8.20    1.08 
  -3 -11   2    8.32    1.04 
   3 -11  -2    7.60    1.15 
   3 -11  -2    7.67    1.24 
   3 -11  -2    8.80    1.33 
   3 -11  -2    7.44    1.27 
  -3 -11   2    7.54    1.14 
   3 -11  -2    7.78    1.39 
   3 -11  -2    7.38    1.18 
  -3 -11   2    8.37    1.16 
   3  11  -2    5.94    0.95 
   3  11  -2    6.99    1.11 
   3  11  -2    7.14    1.10 
   3  11  -2    6.06    1.00 
   3  11  -2    7.05    1.06 
   3  11  -2   10.26    1.25 
   3  11  -2    7.91    1.22 
  -3  11   2    7.29    1.17 
   3  11  -2    7.34    0.92 
  -3  11   2    7.06    1.18 
   2 -11  -2   77.86    4.74 
  -2 -11   2   85.14    5.04 
  -2 -11   2   77.62    5.09 
   2 -11  -2   83.31    4.91 
   2 -11  -2   87.42    5.10 
   2 -11  -2   78.03    5.28 
   2 -11  -2   78.79    5.01 
   2 -11  -2   74.73    5.16 
   2 -11  -2   77.71    4.88 
   2 -11  -2   81.07    5.02 
   2 -11  -2   78.63    4.91 
  -2 -11   2   68.20    5.06 
   2  11  -2   72.20    4.95 
   2  11  -2   76.89    4.80 
  -2  11   2   77.97    4.99 
   2  11  -2   83.39    5.03 
   2  11  -2   82.70    5.26 
   2  11  -2   78.60    5.11 
  -2  11   2   79.09    5.23 
  -2  11   2   80.02    5.05 
   2  11  -2   69.02    5.12 
  -2  11   2   75.20    5.11 
   2  11  -2   77.82    4.79 
   2  11  -2   79.04    4.94 
  -1 -11   2  128.96    7.61 
   1 -11  -2  115.12    7.75 
   1 -11  -2  109.90    7.50 
   1 -11  -2  106.89    7.41 
   1 -11  -2  122.60    7.44 
   1 -11  -2  115.62    7.50 
   1 -11  -2  119.91    7.42 
   1 -11  -2  122.95    7.77 
   1 -11  -2  116.11    7.85 
  -1 -11   2  124.71    7.58 
  -1 -11   2  118.80    7.48 
   1  11  -2  116.39    7.40 
   1  11  -2  127.02    7.68 
   1  11  -2  114.46    7.38 
   1  11  -2  120.19    7.43 
   1  11  -2  112.63    7.48 
   1  11  -2  120.57    7.74 
   1  11  -2  126.47    7.40 
   1  11  -2  126.52    7.42 
  -1  11   2  132.50    7.70 
   1  11  -2  131.91    7.54 
  -1  11   2  120.81    7.47 
  -1  11   2  123.32    7.46 
   1  11  -2  127.53    7.46 
  -1  11   2  120.26    7.58 
  -1  11   2  122.98    7.51 
   0 -11   2   16.97    1.33 
   0 -11   2   19.59    1.97 
   0 -11   2   17.09    1.54 
   0 -11  -2   18.70    1.93 
   0 -11   2   19.30    1.45 
   0 -11   2   18.75    1.32 
   0 -11   2   17.71    1.75 
   0 -11  -2   19.64    1.59 
   0 -11  -2   16.62    1.54 
   0 -11  -2   17.11    1.56 
   0 -11   2   15.77    1.58 
   0  11  -2   15.72    1.48 
   0  11   2   19.77    1.62 
   0  11   2   18.13    1.37 
   0  11   2   18.62    1.33 
   0  11   2   17.84    1.40 
   0  11  -2   17.48    1.41 
   0  11  -2   16.89    1.50 
   0  11  -2   18.14    1.61 
   0  11  -2   16.38    1.55 
   0  11   2   18.29    1.38 
   0  11  -2   17.96    1.44 
   1 -11   2   96.71    6.41 
   1 -11   2   98.91    6.49 
  -1 -11  -2  109.20    6.52 
  -1 -11  -2  116.78    6.82 
  -1 -11  -2  112.16    6.60 
   1 -11   2  112.67    6.74 
   1 -11   2  106.31    6.48 
   1 -11   2  107.17    6.42 
  -1 -11  -2  104.59    6.47 
   1 -11   2  106.43    6.63 
  -1 -11  -2  112.29    6.59 
   1 -11   2  104.23    6.42 
   1 -11   2  106.92    6.45 
  -1  11  -2  108.75    6.51 
   1  11   2   98.33    6.44 
  -1  11  -2  102.40    6.61 
   1  11   2  100.86    6.38 
   1  11   2  101.38    6.38 
  -1  11  -2  108.30    6.75 
  -1  11  -2   99.29    6.53 
   1  11   2   99.77    6.48 
   1  11   2  103.84    6.37 
   1  11   2   93.83    6.61 
  -2 -11  -2  106.00    6.61 
   2 -11   2  100.04    6.57 
  -2 -11  -2  105.41    6.69 
  -2 -11  -2  104.94    6.68 
  -2 -11  -2  107.14    6.57 
   2 -11   2  107.12    6.59 
   2 -11   2  113.75    6.80 
   2 -11   2  109.17    6.74 
   2 -11   2  104.57    6.59 
  -2  11  -2  106.43    6.67 
  -2  11  -2  104.18    6.63 
   2  11   2   98.32    6.69 
   2  11   2  113.33    6.61 
   2  11   2  105.89    6.59 
  -2  11  -2  111.56    6.96 
   2  11   2  102.04    6.71 
   2  11   2  104.81    6.59 
   2  11   2  107.87    6.69 
  -2  11  -2  104.87    6.53 
   2  11   2  109.93    6.83 
  -2  11  -2  107.51    6.73 
  -3 -11  -2   11.20    1.54 
   3 -11   2   12.06    1.00 
   3 -11   2   13.72    1.38 
  -3 -11  -2   12.81    1.13 
   3 -11   2   13.07    1.27 
   3 -11   2   12.43    1.15 
   3 -11   2   13.93    1.29 
   3 -11   2   13.18    1.21 
   3  11   2   13.43    1.30 
   3  11   2   15.06    1.84 
   3  11   2   11.04    1.34 
   3  11   2   14.05    1.46 
  -3  11  -2    9.65    1.31 
   3  11   2   14.37    1.64 
  -3  11  -2   13.93    1.74 
   3  11   2   11.71    1.53 
  -3  11  -2   12.82    1.08 
  -3  11  -2   12.58    1.33 
   3  11   2   13.58    1.30 
   4 -11   2    5.86    1.21 
   4 -11   2    6.97    1.05 
  -4 -11  -2    5.65    0.86 
   4  11   2    5.14    1.21 
  -4  11  -2    5.77    0.85 
   4  11   2    5.43    0.54 
   4  11   2    8.12    1.88 
   4  11   2    3.98    1.05 
   5 -11   2    2.81    0.83 
   5 -11   2    1.49    1.00 
   5 -11   2    2.21    0.66 
   5 -11   2    2.66    0.44 
   5 -11   2    1.71    0.77 
   5 -11   2    2.84    1.14 
   5 -11   2    1.97    0.63 
   5  11   2    1.80    0.48 
   5  11   2    2.13    0.84 
   5  11   2    2.39    0.75 
   5  11   2    2.47    0.49 
   5  11   2    1.93    1.12 
   6 -11   2    0.61    0.61 
   6 -11   2    0.30    0.81 
   6 -11   2    0.92    0.26 
   6  11   2    0.41    0.58 
   6  11   2    0.97    0.23 
   6  11   2    0.85    0.22 
   6 -12  -2    5.65    0.56 
   6 -12  -2    4.41    0.62 
   6 -12  -2    4.64    0.67 
   6 -12  -2    3.81    0.53 
   6 -12  -2    3.17    1.05 
   6 -12  -2    6.25    1.22 
   6  12  -2    5.19    0.67 
   5 -12  -2    6.18    0.73 
   5 -12  -2    4.85    0.78 
   5 -12  -2    5.32    1.39 
   5 -12  -2    6.57    1.23 
   5 -12  -2    6.34    1.64 
   5 -12  -2    4.70    1.23 
   5  12  -2    5.76    0.75 
   5  12  -2    6.23    1.25 
   5  12  -2    6.66    1.12 
   5  12  -2    4.82    0.70 
   5  12  -2    5.85    0.83 
   5  12  -2    6.65    1.23 
  -5  12   2    6.25    2.17 
   5  12  -2    5.52    0.75 
   4 -12  -2    4.02    1.46 
   4 -12  -2    3.78    1.22 
   4 -12  -2    2.88    1.07 
  -4 -12   2    3.78    1.19 
   4 -12  -2    3.60    1.14 
   4 -12  -2    4.10    1.17 
   4 -12  -2    3.88    0.78 
   4  12  -2    3.64    1.01 
  -4  12   2    3.79    1.15 
   4  12  -2    2.78    0.99 
   4  12  -2    4.05    0.77 
   4  12  -2    4.06    1.01 
   4  12  -2    5.10    1.19 
   3 -12  -2   46.66    3.52 
   3 -12  -2   50.08    3.44 
   3 -12  -2   52.40    3.53 
   3 -12  -2   50.65    3.54 
   3 -12  -2   54.19    3.50 
   3 -12  -2   52.28    3.49 
  -3 -12   2   53.48    3.61 
   3  12  -2   49.57    3.39 
   3  12  -2   52.05    3.34 
   3  12  -2   51.64    3.44 
   3  12  -2   51.65    3.38 
   3  12  -2   52.41    3.55 
   3  12  -2   49.02    3.35 
   3  12  -2   54.05    3.43 
   3  12  -2   55.21    3.65 
  -3  12   2   50.72    3.85 
  -3  12   2   52.37    3.54 
  -2 -12   2    2.87    0.93 
   2 -12  -2    2.40    0.63 
  -2 -12   2    2.08    0.88 
   2 -12  -2    1.76    0.41 
   2 -12  -2    2.58    0.96 
   2 -12  -2    3.12    0.98 
   2 -12  -2    2.74    0.97 
  -2 -12   2    2.15    0.75 
   2 -12  -2    2.50    0.72 
   2 -12  -2    3.37    0.85 
   2 -12  -2    3.29    1.26 
   2 -12  -2    2.74    0.68 
   2 -12  -2    2.44    0.86 
   2  12  -2    2.73    1.05 
   2  12  -2    1.87    0.51 
   2  12  -2    2.51    0.85 
   2  12  -2    3.74    0.89 
  -2  12   2    1.52    0.68 
   2  12  -2    0.78    0.75 
   2  12  -2    3.26    1.02 
  -2  12   2    2.57    1.10 
   2  12  -2    2.44    0.82 
  -2  12   2    2.25    0.89 
  -2  12   2    3.04    0.89 
   2  12  -2    2.51    0.97 
   2  12  -2    2.27    0.55 
   1 -12  -2   78.65    5.39 
   1 -12  -2   85.40    5.42 
   1 -12  -2   87.63    5.70 
   1 -12  -2   95.16    5.69 
   1 -12  -2   89.96    5.34 
  -1 -12   2   93.51    5.52 
  -1 -12   2   91.27    5.40 
   1 -12  -2   94.28    5.91 
   1 -12  -2   88.35    5.32 
   1 -12  -2   83.86    5.36 
  -1 -12   2   91.72    5.50 
   1  12  -2   86.71    5.28 
  -1  12   2   83.22    5.36 
   1  12  -2   78.31    5.37 
   1  12  -2   84.08    5.67 
  -1  12   2   78.07    5.46 
  -1  12   2   85.70    5.36 
   1  12  -2   77.71    5.26 
   1  12  -2   88.77    5.33 
  -1  12   2   84.88    5.58 
   1  12  -2   77.31    5.28 
   1  12  -2   86.66    5.34 
   1  12  -2   84.24    5.29 
   1  12  -2   79.24    5.55 
  -1  12   2   83.35    5.40 
   1  12  -2   85.94    5.44 
  -1  12   2   77.46    5.41 
   0 -12   2   91.26    5.53 
   0 -12  -2   94.07    5.71 
   0 -12  -2   84.56    5.63 
   0 -12  -2   93.98    5.73 
   0 -12  -2   96.99    6.05 
   0 -12   2   87.67    5.62 
   0 -12   2   76.77    5.60 
   0 -12   2   80.71    5.96 
   0 -12   2   87.16    6.17 
   0  12   2   87.53    5.57 
   0  12  -2   84.93    5.62 
   0  12  -2   94.14    5.60 
   0  12   2   91.88    5.55 
   0  12   2   93.26    5.57 
   0  12   2   80.60    5.61 
   0  12   2   89.15    5.54 
   0  12  -2   84.61    5.50 
   0  12  -2   93.40    5.73 
   0  12   2   94.84    5.52 
   0  12  -2   83.42    5.64 
   0  12  -2   91.80    5.59 
   0  12  -2   92.77    5.76 
   0  12   2   96.67    5.79 
   1 -12   2   82.28    5.15 
   1 -12   2   83.62    5.27 
  -1 -12  -2   90.48    5.47 
   1 -12   2   85.10    5.35 
   1 -12   2   85.04    5.28 
   1 -12   2   83.05    5.36 
   1 -12   2   85.06    5.61 
  -1 -12  -2   87.93    5.43 
   1 -12   2   83.23    5.30 
   1 -12   2   88.17    5.28 
  -1 -12  -2   91.16    5.49 
  -1 -12  -2   85.24    5.72 
   1 -12   2   84.27    5.51 
  -1 -12  -2   86.66    5.37 
   1  12   2   86.00    5.24 
  -1  12  -2   71.76    5.27 
   1  12   2   83.17    5.34 
   1  12   2   82.12    5.22 
  -1  12  -2   92.82    5.52 
   1  12   2   85.06    5.32 
  -1  12  -2   85.33    5.39 
   1  12   2   84.20    5.34 
  -1  12  -2   90.00    5.65 
  -1  12  -2   89.49    5.43 
   2 -12   2    2.07    0.73 
   2 -12   2    1.18    0.66 
  -2 -12  -2    0.86    0.63 
   2 -12   2    2.86    0.86 
   2 -12   2    2.24    0.71 
   2 -12   2    2.43    0.90 
   2 -12   2    2.86    0.71 
  -2 -12  -2    2.08    0.90 
  -2 -12  -2    3.11    0.92 
  -2 -12  -2    2.80    0.80 
   2 -12   2    2.44    0.68 
  -2  12  -2    3.02    0.82 
  -2  12  -2    2.28    0.74 
  -2  12  -2    2.08    0.92 
   2  12   2    1.95    0.73 
   2  12   2    1.70    0.77 
   2  12   2    3.30    0.87 
   2  12   2    2.18    0.97 
   2  12   2    1.73    0.70 
   2  12   2    3.32    1.25 
   2  12   2    1.02    0.92 
   2  12   2    1.72    1.07 
   2  12   2    2.86    0.75 
  -2  12  -2    2.03    1.14 
  -2  12  -2    0.62    0.63 
   3 -12   2   46.60    3.04 
   3 -12   2   46.08    2.90 
  -3 -12  -2   49.39    3.02 
   3 -12   2   46.42    3.00 
   3 -12   2   45.25    3.03 
   3 -12   2   46.72    3.05 
  -3 -12  -2   42.19    3.15 
   3 -12   2   48.68    3.16 
   3  12   2   45.52    2.82 
   3  12   2   41.34    3.08 
  -3  12  -2   45.84    3.12 
  -3  12  -2   44.10    3.52 
   3  12   2   43.40    2.99 
  -3  12  -2   41.36    3.26 
   3  12   2   47.29    3.07 
  -3  12  -2   44.44    3.38 
   3  12   2   45.46    3.02 
   3  12   2   50.20    3.57 
  -3  12  -2   45.41    2.97 
   4 -12   2    2.80    1.00 
   4 -12   2    2.97    0.89 
   4 -12   2    4.11    1.21 
  -4 -12  -2    2.57    0.86 
   4  12   2    2.45    0.50 
   4  12   2    4.14    1.06 
   4  12   2    0.77    1.73 
   4  12   2    3.80    1.26 
  -4  12  -2    3.33    0.80 
   5 -12   2    5.03    0.60 
   5 -12   2    5.85    1.12 
   5 -12   2    5.26    0.93 
   5 -12   2    4.37    0.67 
   5 -12   2    6.73    1.44 
   5 -12   2    5.52    0.74 
   5 -12   2    5.16    0.74 
   5  12   2    4.85    1.42 
   5  12   2    4.28    0.57 
   5  12   2    4.80    1.09 
   6 -12   2    3.02    0.87 
   6 -12   2    2.48    1.14 
   6  12   2    3.07    0.28 
   6  12   2    1.37    0.62 
   6  12   2    2.65    0.28 
   6 -13  -2    5.55    1.03 
   6 -13  -2    8.43    0.73 
   6 -13  -2    6.58    0.67 
   6 -13  -2    7.38    1.17 
   6 -13  -2    7.45    0.74 
   5 -13  -2    1.42    0.96 
   5 -13  -2    5.28    0.70 
   5 -13  -2    2.68    1.01 
   5 -13  -2    3.28    1.15 
   5 -13  -2    4.03    0.75 
   5 -13  -2    4.42    1.52 
   5  13  -2    4.78    0.80 
  -5  13   2    2.68    1.64 
   5  13  -2    3.90    0.71 
   5  13  -2    4.08    1.21 
   5  13  -2    3.83    1.17 
   5  13  -2    4.55    0.74 
   5  13  -2    3.98    0.97 
   4 -13  -2    6.09    1.59 
   4 -13  -2    7.10    1.59 
   4 -13  -2    5.43    1.31 
   4 -13  -2    5.88    1.24 
   4 -13  -2    6.62    1.19 
   4 -13  -2    5.76    0.90 
  -4  13   2    5.30    1.71 
   4  13  -2    7.30    1.13 
   4  13  -2    7.19    0.89 
  -4  13   2    7.09    1.29 
   4  13  -2    7.60    1.14 
   4  13  -2    7.36    1.51 
   4  13  -2    7.60    1.25 
   3 -13  -2   24.40    2.02 
  -3 -13   2   25.51    2.05 
   3 -13  -2   22.83    1.82 
   3 -13  -2   22.68    1.86 
   3 -13  -2   22.49    1.90 
   3 -13  -2   27.04    2.06 
   3 -13  -2   23.79    2.06 
  -3  13   2   24.19    1.97 
   3  13  -2   20.55    1.83 
   3  13  -2   22.89    1.72 
   3  13  -2   21.64    1.78 
   3  13  -2   22.31    2.00 
  -3  13   2   17.62    2.13 
   3  13  -2   22.03    1.77 
   3  13  -2   21.76    1.99 
   3  13  -2   20.63    1.88 
   3  13  -2   19.75    1.74 
  -3  13   2   20.77    1.97 
   2 -13  -2   20.12    1.60 
   2 -13  -2   19.08    1.55 
   2 -13  -2   20.71    1.79 
  -2 -13   2   17.25    1.76 
   2 -13  -2   21.58    1.75 
   2 -13  -2   25.16    2.52 
   2 -13  -2   20.34    1.50 
   2 -13  -2   20.38    1.30 
   2 -13  -2   20.87    2.05 
   2 -13  -2   19.84    1.56 
  -2 -13   2   22.11    1.80 
   2 -13  -2   21.30    1.88 
   2  13  -2   18.90    1.48 
  -2  13   2   18.79    1.95 
   2  13  -2   21.41    1.81 
   2  13  -2   18.97    2.02 
   2  13  -2   18.70    1.77 
   2  13  -2   17.95    1.89 
  -2  13   2   21.25    1.71 
   2  13  -2   20.82    1.63 
   2  13  -2   19.72    1.38 
   2  13  -2   18.29    1.38 
   2  13  -2   20.28    1.66 
  -2  13   2   22.30    1.83 
   1 -13  -2   12.63    1.58 
   1 -13  -2   12.72    1.41 
   1 -13  -2   11.99    1.37 
  -1 -13   2   12.62    1.27 
   1 -13  -2   13.30    2.05 
   1 -13  -2   13.20    1.34 
  -1 -13   2   12.08    1.32 
   1 -13  -2   12.96    1.15 
   1 -13  -2   14.37    1.19 
   1  13  -2   11.76    1.17 
  -1  13   2   10.50    1.20 
   1  13  -2   11.24    1.52 
   1  13  -2   13.71    1.33 
  -1  13   2   10.20    1.37 
  -1  13   2   11.89    1.25 
   1  13  -2   11.80    1.14 
   1  13  -2   12.06    1.09 
   1  13  -2   10.63    1.15 
  -1  13   2   10.47    1.29 
   1  13  -2   10.64    1.09 
   1  13  -2   11.68    1.12 
   1  13  -2   10.89    1.27 
   1  13  -2    9.55    1.40 
  -1  13   2   10.92    1.46 
   1  13  -2   11.49    1.62 
   0 -13  -2    5.35    1.10 
   0 -13  -2    4.72    1.06 
   0 -13  -2    4.37    1.09 
   0 -13   2    5.69    0.73 
   0 -13   2    3.81    0.99 
   0 -13   2    4.99    0.98 
   0 -13  -2    4.96    1.38 
   0  13   2    4.36    0.82 
   0  13   2    5.35    0.80 
   0  13  -2    5.02    1.02 
   0  13  -2    4.82    0.90 
   0  13  -2    4.53    0.81 
   0  13   2    4.36    1.00 
   0  13   2    4.42    1.08 
   0  13   2    5.19    0.77 
   0  13  -2    4.24    1.10 
   0  13  -2    4.90    0.90 
   0  13   2    5.93    1.10 
   0  13   2    6.37    0.82 
   0  13  -2    6.05    0.98 
   0  13   2    4.90    0.88 
   0  13  -2    4.99    1.14 
  -1 -13  -2   23.78    1.82 
   1 -13   2   20.21    1.43 
   1 -13   2   21.38    1.77 
   1 -13   2   20.72    1.61 
   1 -13   2   20.28    1.76 
  -1 -13  -2   23.21    1.87 
   1 -13   2   21.35    1.65 
   1 -13   2   25.19    1.63 
   1 -13   2   22.37    1.84 
   1 -13   2   21.34    1.88 
  -1 -13  -2   22.15    1.90 
   1 -13   2   23.54    2.08 
  -1 -13  -2   24.50    2.23 
   1  13   2   22.69    1.51 
   1  13   2   23.29    1.93 
   1  13   2   23.25    1.59 
   1  13   2   26.18    1.81 
  -1  13  -2   24.05    1.91 
   1  13   2   22.52    1.77 
   1  13   2   23.62    1.75 
   1  13   2   23.10    1.56 
  -1  13  -2   24.82    1.85 
   1  13   2   23.60    1.96 
  -1  13  -2   21.17    1.64 
  -1  13  -2   22.84    1.83 
   1  13   2   24.30    1.79 
  -1  13  -2   26.82    2.12 
   2 -13   2   16.73    1.43 
   2 -13   2   16.20    1.33 
   2 -13   2   16.55    1.49 
   2 -13   2   16.80    1.73 
  -2 -13  -2   18.01    1.45 
   2 -13   2   16.15    1.52 
   2 -13   2   17.88    1.49 
  -2 -13  -2   16.23    1.59 
  -2 -13  -2   18.64    1.55 
   2  13   2   19.73    1.93 
  -2  13  -2   17.55    1.56 
   2  13   2   17.48    1.51 
  -2  13  -2   17.00    1.90 
   2  13   2   18.37    1.52 
   2  13   2   15.96    1.50 
  -2  13  -2   18.85    1.67 
   2  13   2   16.72    1.66 
   2  13   2   16.48    1.43 
   2  13   2   17.05    1.66 
   2  13   2   11.93    1.53 
   3 -13   2   36.03    2.70 
   3 -13   2   38.82    2.72 
   3 -13   2   37.63    2.68 
   3 -13   2   37.76    2.70 
   3 -13   2   39.33    2.56 
   3 -13   2   40.75    2.86 
  -3 -13  -2   39.65    2.71 
   3  13   2   38.80    2.74 
  -3  13  -2   39.21    2.66 
   3  13   2   41.17    3.23 
   3  13   2   40.84    2.50 
   3  13   2   38.20    2.82 
  -3  13  -2   40.72    3.01 
  -3  13  -2   41.58    2.81 
   3  13   2   39.88    2.72 
   3  13   2   42.06    2.73 
  -3  13  -2   41.08    3.27 
  -4 -13  -2    4.82    0.99 
   4 -13   2    6.84    1.12 
   4 -13   2    5.45    1.51 
   4 -13   2    7.73    1.40 
   4  13   2    5.90    1.38 
   4  13   2    5.75    1.92 
  -4  13  -2    4.95    0.93 
   4  13   2    5.51    1.20 
   5 -13   2    6.01    0.75 
   5 -13   2    5.04    0.70 
   5 -13   2    5.63    0.93 
   5 -13   2    5.54    1.33 
   5 -13   2    5.90    1.14 
   5 -13   2    5.47    0.72 
   5  13   2    5.52    1.29 
   5  13   2    4.10    0.80 
   5  13   2    4.96    0.40 
   5  13   2    5.20    0.59 
   5  13   2    5.04    0.41 
   6 -13   2    4.95    1.10 
   6 -13   2    5.92    0.47 
   6  13   2    6.07    0.44 
   6  13   2    3.88    1.00 
   6  13   2    5.98    0.43 
   6 -14  -2    3.60    0.93 
   6 -14  -2    6.17    0.62 
   6 -14  -2    5.57    0.64 
   6 -14  -2    3.63    1.02 
   6 -14  -2    5.31    0.56 
   5 -14  -2    0.70    0.47 
   5 -14  -2    0.98    0.92 
   5 -14  -2    0.78    0.81 
   5 -14  -2    0.54    0.48 
   5 -14  -2   -0.30    0.87 
   5 -14  -2    0.75    0.81 
   5  14  -2    0.68    0.47 
   5  14  -2    2.21    0.78 
   5  14  -2    1.37    0.89 
   5  14  -2    0.66    0.65 
   5  14  -2    2.39    0.96 
   5  14  -2    0.42    0.51 
   4 -14  -2    3.58    1.26 
   4 -14  -2    6.79    1.19 
   4 -14  -2    4.87    1.36 
   4 -14  -2    4.37    1.52 
   4 -14  -2    5.98    0.91 
   4 -14  -2    5.50    1.18 
  -4  14   2    5.83    1.28 
   4  14  -2    6.93    1.12 
  -4  14   2    4.95    1.99 
   4  14  -2    6.90    0.89 
   4  14  -2    7.00    1.14 
   4  14  -2    5.21    1.49 
   4  14  -2    7.05    1.25 
   3 -14  -2   37.63    2.84 
   3 -14  -2   33.41    2.92 
   3 -14  -2   40.31    2.79 
   3 -14  -2   39.87    2.82 
   3 -14  -2   37.86    2.73 
  -3 -14   2   42.23    2.99 
   3 -14  -2   41.28    2.78 
   3  14  -2   39.09    2.67 
  -3  14   2   36.84    3.12 
  -3  14   2   41.46    2.87 
   3  14  -2   38.96    2.74 
   3  14  -2   34.83    2.60 
   3  14  -2   32.72    2.86 
   3  14  -2   35.51    2.73 
  -3  14   2   35.64    2.92 
   3  14  -2   39.41    2.82 
  -3  14   2   38.82    2.88 
   3  14  -2   36.91    2.64 
   3  14  -2   37.92    2.66 
  -2 -14   2   37.70    2.81 
   2 -14  -2   38.50    2.72 
   2 -14  -2   38.04    2.73 
   2 -14  -2   38.13    2.32 
   2 -14  -2   39.79    2.76 
   2 -14  -2   38.83    2.97 
   2 -14  -2   39.13    2.59 
   2 -14  -2   40.27    2.90 
   2 -14  -2   37.23    2.65 
   2 -14  -2   37.93    3.07 
  -2 -14   2   39.96    2.79 
   2 -14  -2   37.06    2.59 
  -2  14   2   37.50    2.99 
   2  14  -2   36.16    2.46 
   2  14  -2   34.67    2.53 
   2  14  -2   40.74    2.80 
   2  14  -2   39.73    2.62 
  -2  14   2   37.92    2.84 
  -2  14   2   34.01    2.71 
   2  14  -2   36.16    2.75 
   2  14  -2   35.84    2.63 
   2  14  -2   36.91    2.69 
  -2  14   2   39.01    2.70 
   2  14  -2   33.60    2.99 
   2  14  -2   34.64    2.39 
  -1 -14   2   32.06    2.40 
  -1 -14   2   30.85    2.58 
  -1 -14   2   25.93    2.41 
   1 -14  -2   30.84    2.59 
   1 -14  -2   34.79    2.49 
   1 -14  -2   36.92    2.53 
   1 -14  -2   32.52    2.38 
   1 -14  -2   31.74    2.45 
   1 -14  -2   29.83    2.27 
  -1  14   2   33.33    2.36 
  -1  14   2   35.53    2.66 
   1  14  -2   30.89    2.24 
   1  14  -2   33.98    2.43 
   1  14  -2   31.43    2.75 
  -1  14   2   32.80    2.47 
   1  14  -2   33.40    2.26 
   1  14  -2   30.93    2.30 
  -1  14   2   34.41    2.40 
   1  14  -2   34.91    2.23 
   1  14  -2   36.70    2.60 
   1  14  -2   32.35    2.38 
   1  14  -2   33.95    2.28 
  -1  14   2   33.15    2.50 
   1  14  -2   33.32    2.30 
   1  14  -2   31.56    2.24 
   0 -14  -2   43.17    3.04 
   0 -14  -2   46.82    3.47 
   0 -14   2   43.35    2.91 
   0 -14   2   40.61    2.92 
   0 -14  -2   42.13    2.97 
   0 -14   2   42.92    2.79 
   0 -14   2   40.36    2.94 
   0 -14   2   34.66    3.22 
   0 -14  -2   41.06    3.06 
   0  14  -2   41.75    2.78 
   0  14   2   45.15    3.07 
   0  14   2   39.76    2.88 
   0  14   2   38.84    2.76 
   0  14  -2   42.34    2.97 
   0  14   2   38.31    2.94 
   0  14   2   44.71    2.85 
   0  14   2   44.97    2.85 
   0  14   2   38.43    2.82 
   0  14  -2   42.37    2.94 
   0  14  -2   47.32    3.15 
   0  14  -2   46.02    2.88 
   0  14   2   46.06    3.13 
   0  14  -2   42.27    2.87 
   0  14   2   46.99    2.80 
  -1 -14  -2   25.77    2.38 
   1 -14   2   27.27    2.30 
   1 -14   2   25.40    1.87 
   1 -14   2   27.03    1.96 
  -1 -14  -2   26.44    2.11 
   1 -14   2   24.99    1.97 
   1 -14   2   28.83    1.81 
   1 -14   2   20.65    2.02 
   1 -14   2   25.57    1.79 
   1 -14   2   23.16    1.81 
   1 -14   2   28.25    1.60 
  -1 -14  -2   26.23    1.98 
   1 -14   2   28.79    1.76 
   1 -14   2   24.87    2.08 
  -1 -14  -2   27.81    2.08 
   1  14   2   27.55    1.98 
   1  14   2   23.43    1.73 
  -1  14  -2   25.24    1.87 
   1  14   2   24.07    1.66 
  -1  14  -2   24.85    2.08 
  -1  14  -2   24.11    2.27 
   1  14   2   24.33    1.86 
  -1  14  -2   27.43    2.04 
  -1  14  -2   25.58    2.00 
   1  14   2   25.68    1.95 
   1  14   2   22.55    1.72 
   1  14   2   26.74    1.95 
   1  14   2   21.68    2.09 
   1  14   2   25.22    2.11 
   2 -14   2   33.23    2.46 
   2 -14   2   31.98    2.68 
   2 -14   2   34.37    2.31 
  -2 -14  -2   29.30    2.54 
  -2 -14  -2   33.54    2.46 
   2 -14   2   33.83    2.41 
   2 -14   2   32.58    2.44 
  -2 -14  -2   36.09    2.40 
   2 -14   2   34.08    2.42 
   2 -14   2   32.34    2.41 
   2  14   2   35.92    2.40 
  -2  14  -2   38.41    2.54 
   2  14   2   32.39    2.85 
   2  14   2   33.78    2.63 
  -2  14  -2   29.61    2.59 
  -2  14  -2   35.07    2.63 
   2  14   2   32.05    2.47 
   2  14   2   34.54    2.32 
   2  14   2   36.46    2.46 
  -2  14  -2   35.66    2.89 
   2  14   2   40.71    2.84 
   2  14   2   33.62    2.35 
   2  14   2   34.15    2.41 
   2  14   2   35.33    2.39 
   2  14   2   34.29    2.37 
   3 -14   2   30.08    2.23 
   3 -14   2   29.26    2.27 
   3 -14   2   31.13    2.15 
  -3 -14  -2   29.39    2.20 
   3 -14   2   30.69    2.41 
   3 -14   2   30.07    2.21 
   3 -14   2   32.08    2.05 
   3  14   2   29.44    2.21 
   3  14   2   32.18    2.01 
  -3  14  -2   27.28    2.52 
  -3  14  -2   24.75    2.72 
   3  14   2   33.25    2.87 
   3  14   2   29.26    2.34 
   3  14   2   31.92    2.27 
  -3  14  -2   32.00    2.32 
   3  14   2   30.01    2.35 
   3  14   2   28.74    2.25 
   4 -14   2   10.03    1.59 
   4 -14   2   10.64    1.30 
   4 -14   2   10.95    1.53 
  -4 -14  -2    8.97    1.56 
   4  14   2    6.63    2.17 
   4  14   2   11.05    1.37 
   4  14   2    8.80    1.62 
   5 -14   2    1.03    0.63 
   5 -14   2    0.11    0.71 
   5 -14   2    0.71    0.40 
   5 -14   2    0.39    0.88 
   5 -14   2    1.02    0.46 
   5 -14   2   -0.16    0.44 
   5  14   2    0.66    0.66 
   5  14   2    0.41    0.21 
   5  14   2    1.29    0.97 
   5  14   2    0.50    0.20 
   5  14   2    0.14    0.35 
   5  14   2    0.99    0.49 
   6 -14   2    3.00    1.00 
   6 -14   2    2.91    0.34 
   6  14   2    3.56    0.31 
   6  14   2    3.31    0.29 
   6  14   2    2.99    0.75 
   6 -15  -2    3.32    1.02 
   6 -15  -2    4.39    0.50 
   6 -15  -2    3.51    0.49 
   6 -15  -2    2.68    0.81 
   6 -15  -2    3.74    0.51 
   6  15  -2    3.51    0.65 
   5 -15  -2    0.82    0.46 
   5 -15  -2    0.03    0.72 
   5 -15  -2   -0.02    0.96 
   5 -15  -2    0.20    0.78 
   5 -15  -2    0.49    0.47 
   5 -15  -2    1.41    0.85 
   5 -15  -2    0.32    0.89 
   5  15  -2    0.95    0.99 
   5  15  -2    1.61    0.54 
   5  15  -2    1.61    0.90 
   5  15  -2    0.61    0.63 
   5  15  -2    1.14    0.49 
   5  15  -2    1.28    0.50 
  -5  15   2    1.01    1.93 
   4 -15  -2    3.69    0.85 
   4 -15  -2    3.24    1.26 
   4 -15  -2    2.86    1.46 
   4 -15  -2    1.74    1.09 
   4 -15  -2    1.61    0.96 
   4 -15  -2    3.88    1.03 
  -4  15   2    4.51    1.96 
  -4  15   2    3.98    1.27 
   4  15  -2    4.89    1.18 
   4  15  -2    5.37    1.11 
   4  15  -2    4.19    1.12 
   4  15  -2    4.06    0.83 
   4  15  -2    2.99    1.12 
   3 -15  -2   21.61    1.83 
  -3 -15   2   24.06    2.08 
   3 -15  -2   18.71    2.09 
   3 -15  -2   22.03    2.02 
   3 -15  -2   19.30    1.85 
   3 -15  -2   19.18    1.96 
   3 -15  -2   19.85    1.98 
   3  15  -2   23.36    1.98 
  -3  15   2   21.15    2.00 
   3  15  -2   20.72    1.89 
   3  15  -2   21.60    1.71 
   3  15  -2   20.67    1.74 
  -3  15   2   17.39    2.30 
  -3  15   2   14.33    2.09 
   3  15  -2   18.23    1.81 
  -3  15   2   24.52    1.98 
   3  15  -2   22.67    1.72 
   3  15  -2   17.82    1.73 
   3  15  -2   16.17    1.91 
   2 -15  -2   22.39    1.90 
   2 -15  -2   22.75    1.51 
  -2 -15   2   22.83    2.50 
   2 -15  -2   22.21    2.34 
   2 -15  -2   22.30    1.80 
   2 -15  -2   22.46    1.86 
  -2 -15   2   21.80    2.08 
   2 -15  -2   24.39    2.22 
   2 -15  -2   23.89    2.04 
   2 -15  -2   25.16    2.05 
  -2  15   2   26.23    2.00 
  -2  15   2   18.89    2.20 
   2  15  -2   25.64    1.96 
   2  15  -2   25.86    2.08 
   2  15  -2   26.07    1.91 
  -2  15   2   23.58    2.08 
   2  15  -2   23.85    1.81 
  -2  15   2   21.68    2.18 
   2  15  -2   23.91    1.69 
   2  15  -2   26.90    2.05 
   2  15  -2   25.03    1.95 
  -2  15   2   23.13    2.10 
   2  15  -2   21.49    2.30 
   1 -15  -2    1.39    0.78 
  -1 -15   2    0.78    0.99 
  -1 -15   2    0.12    0.66 
   1 -15  -2    0.80    0.71 
   1 -15  -2    1.34    0.93 
   1 -15  -2    0.99    0.75 
  -1 -15   2    1.13    0.78 
   1 -15  -2    1.67    1.02 
   1 -15  -2    1.53    1.07 
   1  15  -2    1.45    0.76 
   1  15  -2    0.68    0.59 
   1  15  -2    1.26    0.69 
  -1  15   2   -0.41    0.78 
   1  15  -2    2.10    0.96 
  -1  15   2    1.44    0.75 
   1  15  -2    1.49    0.83 
   1  15  -2    1.54    0.65 
  -1  15   2    1.29    0.98 
   1  15  -2    0.97    1.01 
   1  15  -2    0.92    0.51 
   1  15  -2    0.75    0.61 
   1  15  -2    2.27    0.83 
   1  15  -2    1.12    0.86 
  -1  15   2    0.49    1.02 
   0 -15  -2   58.72    4.36 
   0 -15   2   57.32    3.88 
   0 -15   2   56.32    3.83 
   0 -15  -2   59.46    3.91 
   0 -15  -2   58.68    4.02 
   0 -15   2   54.84    3.87 
   0 -15   2   63.29    3.75 
   0 -15   2   54.14    3.94 
   0  15  -2   59.91    3.90 
   0  15   2   55.45    4.03 
   0  15   2   58.28    3.95 
   0  15  -2   62.84    3.94 
   0  15  -2   58.55    3.74 
   0  15   2   58.59    3.78 
   0  15   2   51.72    3.77 
   0  15  -2   62.79    4.08 
   0  15   2   56.93    3.82 
   0  15   2   60.94    3.72 
   0  15   2   62.04    3.78 
   0  15  -2   56.84    3.80 
   0  15   2   59.02    3.90 
   0  15   2   54.24    3.70 
   1 -15   2    1.06    0.84 
   1 -15   2    0.75    0.80 
  -1 -15  -2    1.45    1.07 
   1 -15   2    0.87    0.73 
   1 -15   2    1.38    0.72 
   1 -15   2    1.93    0.61 
   1 -15   2    1.55    0.68 
  -1 -15  -2    0.66    0.78 
  -1 -15  -2    1.25    0.94 
   1 -15   2    1.60    0.60 
   1 -15   2    1.67    0.65 
   1 -15   2    1.22    0.57 
   1 -15   2    1.40    0.29 
   1 -15   2    0.46    0.72 
  -1  15  -2    1.36    0.89 
   1  15   2    1.01    0.40 
   1  15   2    0.79    0.46 
   1  15   2    1.35    0.66 
   1  15   2    1.55    0.83 
   1  15   2    1.68    0.76 
  -1  15  -2    1.03    0.70 
   1  15   2    0.82    0.57 
  -1  15  -2    1.50    1.17 
  -1  15  -2    0.51    0.71 
   1  15   2    1.29    0.94 
   1  15   2    0.98    0.65 
  -1  15  -2    1.26    0.79 
  -2 -15  -2   20.94    2.03 
   2 -15   2   24.77    1.93 
   2 -15   2   24.37    1.86 
   2 -15   2   22.72    2.20 
   2 -15   2   24.46    1.93 
   2 -15   2   23.04    1.83 
   2 -15   2   24.95    1.90 
   2 -15   2   25.52    1.70 
  -2 -15  -2   26.07    1.95 
  -2  15  -2   24.94    2.01 
  -2  15  -2   21.91    2.06 
   2  15   2   21.79    1.93 
   2  15   2   24.56    2.30 
   2  15   2   22.97    2.34 
   2  15   2   22.01    1.82 
   2  15   2   24.85    1.89 
   2  15   2   21.45    2.09 
  -2  15  -2   26.52    2.39 
   2  15   2   22.49    1.81 
  -2  15  -2   21.97    2.02 
   2  15   2   21.99    1.96 
   2  15   2   23.02    1.88 
   2  15   2   22.92    1.84 
   2  15   2   24.83    1.90 
   3 -15   2   22.01    1.61 
  -3 -15  -2   20.32    1.76 
   3 -15   2   21.40    1.83 
   3 -15   2   22.43    1.81 
   3 -15   2   22.37    2.07 
   3 -15   2   23.04    1.82 
   3 -15   2   24.99    1.71 
   3  15   2   21.90    1.97 
   3  15   2   22.89    1.86 
  -3  15  -2   19.74    2.38 
   3  15   2   20.78    1.72 
   3  15   2   22.70    2.00 
  -3  15  -2   20.13    2.12 
   3  15   2   23.73    2.46 
   3  15   2   20.47    1.59 
   3  15   2   18.51    1.88 
  -3  15  -2   22.25    1.90 
   4 -15   2    2.57    1.05 
   4 -15   2    3.16    1.08 
   4 -15   2    2.73    1.30 
   4  15   2    2.65    0.94 
   4  15   2    2.61    1.22 
   5 -15   2    2.64    0.63 
   5 -15   2    2.35    0.55 
   5 -15   2    1.04    0.88 
   5 -15   2    2.49    0.82 
   5 -15   2    1.88    0.79 
   5 -15   2    1.84    0.63 
   5  15   2    2.27    1.00 
   5  15   2    1.48    0.68 
   5  15   2    3.47    0.66 
   5  15   2    1.69    0.34 
   5  15   2    1.63    0.54 
   5  15   2    2.29    0.32 
   6 -15   2    4.51    0.38 
   6  15   2    4.64    0.35 
   6  15   2    5.21    0.72 
   6  15   2    5.01    0.37 
   6 -16  -2    0.07    0.29 
   6 -16  -2   -0.12    0.44 
   6 -16  -2   -0.03    0.30 
   6 -16  -2    0.12    0.25 
   6  16  -2   -0.01    0.42 
   6  16  -2    0.35    0.39 
   6  16  -2    0.18    0.25 
   5 -16  -2    0.16    0.85 
   5 -16  -2    1.15    0.46 
   5 -16  -2    1.05    0.47 
   5 -16  -2    0.78    0.74 
   5 -16  -2    0.80    0.74 
   5 -16  -2    0.60    0.75 
   5 -16  -2    1.00    0.87 
   5  16  -2    0.76    0.53 
   5  16  -2    0.67    0.59 
   5  16  -2    1.18    0.90 
   5  16  -2    0.42    0.46 
  -5  16   2   -0.11    1.60 
   5  16  -2    1.05    0.49 
   5  16  -2    0.75    0.94 
   4 -16  -2   11.89    1.82 
   4 -16  -2   15.11    1.21 
   4 -16  -2   15.57    1.50 
   4 -16  -2   16.44    1.71 
   4 -16  -2   15.36    1.23 
   4 -16  -2   15.21    1.29 
   4 -16  -2   18.69    1.16 
   4 -16  -2   15.00    1.50 
   4 -16  -2    9.65    1.61 
   4 -16  -2   14.70    2.00 
   4 -16  -2   17.19    1.53 
   4  16  -2   13.67    1.24 
   4  16  -2   16.46    1.25 
   4  16  -2   12.90    1.05 
   4  16  -2   13.78    1.46 
   4  16  -2   15.42    1.72 
   4  16  -2   15.20    0.99 
   4  16  -2   16.11    1.49 
   4  16  -2   15.32    1.25 
   4  16  -2   13.39    1.22 
   4  16  -2   13.50    1.79 
  -4  16   2   13.64    2.43 
   4  16  -2   14.80    1.31 
   3 -16  -2    2.58    1.09 
   3 -16  -2    3.21    1.34 
   3 -16  -2    3.77    1.13 
   3 -16  -2    2.80    1.11 
   3 -16  -2    3.77    1.07 
   3 -16  -2    2.68    1.05 
   3  16  -2    2.52    0.96 
   3  16  -2    2.77    0.88 
  -3  16   2    3.38    1.26 
   3  16  -2    1.77    0.96 
   3  16  -2    2.18    1.04 
  -3  16   2    1.93    1.04 
   3  16  -2    3.11    1.17 
   3  16  -2    1.50    1.08 
  -3  16   2    0.55    1.43 
   3  16  -2    2.13    0.87 
   2 -16  -2   26.31    2.33 
   2 -16  -2   23.08    1.96 
   2 -16  -2   28.02    2.23 
   2 -16  -2   24.56    2.15 
  -2 -16   2   30.04    2.29 
   2 -16  -2   24.77    1.68 
   2 -16  -2   24.44    2.04 
   2 -16  -2   26.52    2.21 
   2  16  -2   27.21    2.09 
  -2  16   2   25.73    2.50 
  -2  16   2   27.37    2.18 
   2  16  -2   28.50    2.25 
   2  16  -2   27.22    2.06 
   2  16  -2   27.64    2.27 
   2  16  -2   26.53    1.97 
  -2  16   2   25.09    2.24 
   2  16  -2   27.48    2.17 
  -2  16   2   24.82    2.54 
   2  16  -2   27.04    1.85 
   1 -16  -2    4.08    1.09 
  -1 -16   2    2.91    1.18 
   1 -16  -2    4.28    1.41 
   1 -16  -2    5.71    2.02 
   1 -16  -2    3.97    1.21 
   1 -16  -2    4.11    1.11 
   1 -16  -2    2.63    1.02
[truncated: 1,000,326 more chars]
